# Supplementary material for: [Fe<sup>III</sup>Cl(TMPPH<sub>2</sub>)][Fe<sup>III</sup>Cl<sub>4</sub>]<sub>2</sub>: A Stand-Alone Molecular Nanomedicine that Induces High Cytotoxicity by Ferroptosis
Source: Preprints.org preprint supplement (doi:10.20944/preprints202404.1891.v1), 2024-04-29

## checkCIF/PLATON report

You have not supplied any structure factors. As a result the full set of tests cannot be run.

THIS REPORT IS FOR GUIDANCE ONLY. IF USED AS PART OF A REVIEW PROCEDURE FOR PUBLICATION, IT SHOULD NOT REPLACE THE EXPERTISE OF AN EXPERIENCED CRYSTALLOGRAPHIC REFEREE.

No syntax errors found.      CIF dictionary      Interpreting this report

### Datablock: Fe-TMPP

---

Bond precision:      C-C = 0.0141 Å

Wavelength=0.71073

Cell:                      a=9.5980 (6)                      b=11.0408 (7)                      c=14.4682 (10)  
                              alpha=70.702 (3)                      beta=86.792 (3)                      gamma=75.171 (2)  
Temperature:              213 K

|                        | Calculated                                  | Reported                                    |
|------------------------|---------------------------------------------|---------------------------------------------|
| Volume                 | 1398.16 (16)                                | 1398.16 (16)                                |
| Space group            | P -1                                        | P -1                                        |
| Hall group             | -P 1                                        | -P 1                                        |
| Moiety formula         | C44 H34 Cl Fe N8, 2 (Cl4 Fe)<br>[+ solvent] | C44 H34 Cl Fe N8, 2 (Cl4 Fe)<br>[+ solvent] |
| Sum formula            | C44 H34 Cl9 Fe3 N8 [+<br>solvent]           | C44 H34 Cl9 Fe3 N8                          |
| Mr                     | 1161.39                                     | 1161.39                                     |
| Dx, g cm <sup>-3</sup> | 1.379                                       | 1.379                                       |
| Z                      | 1                                           | 1                                           |
| Mu (mm <sup>-1</sup> ) | 1.234                                       | 1.234                                       |
| F000                   | 585.0                                       | 585.0                                       |
| F000'                  | 587.48                                      |                                             |
| h, k, lmax             | 10, 12, 16                                  | 10, 12, 16                                  |
| Nref                   | 4014                                        | 4006                                        |
| Tmin, Tmax             | 0.929, 0.940                                | 0.929, 0.940                                |
| Tmin'                  | 0.691                                       |                                             |

Correction method= # Reported T Limits: Tmin=0.929 Tmax=0.940  
AbsCorr = MULTI-SCAN

Data completeness= 0.998

Theta (max)= 23.255

R(reflections)= 0.1007( 2844)

wR2(reflections)=  
0.3123( 4006)

S = 1.057

Npar= 339

---

The following ALERTS were generated. Each ALERT has the format

**test-name\_ALERT\_alert-type\_alert-level.**

Click on the hyperlinks for more details of the test.

---

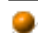

#### Alert level B

THETM01\_ALERT\_3\_B The value of sine(theta\_max)/wavelength is less than 0.575  
Calculated sin(theta\_max)/wavelength = 0.5555

**Author Response:** The crystal exhibits nearly no diffraction at the high-resolution (low angle) region. This is likely due to the quick evaporation of crystalline solvate during the experiment though low temperature is used. Refinement with the inclusion of these weak data leads to a very high R-value of around 20%. Therefore, a resolution cutoff of 0.90 is applied to obtain a reasonable R factor.

PLAT094\_ALERT\_2\_B Ratio of Maximum / Minimum Residual Density .... 6.18 Report

**Author Response:** A residual density (3.02 e\%A<sup>-3</sup>) is identified and such density is 1.812 \%A from Cl1 and 2.850 \%A from the disordered Cl2A. Our refinement of this residual density using a disordered solvate model failed to result in any meaningful results. The presence of this residual density might be due to the low-quality of the crystal.

PLAT097\_ALERT\_2\_B Large Reported Max. (Positive) Residual Density 3.02 eA-3

**Author Response:** This alert describes the same issue as that for PLAT094. A residual density (3.02 e\%A<sup>-3</sup>) is identified and such density is 1.812 \%A from Cl1 and 2.850 \%A from the disordered Cl2A. Our refinement of this residual density using a disordered solvate model failed to result in any meaningful results. The presence of this residual density might be due to the low-quality of the crystal.

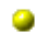

#### Alert level C

DIFMX02\_ALERT\_1\_C The maximum difference density is > 0.1\*ZMAX\*0.75  
The relevant atom site should be identified.

|                   |                                                |      |        |
|-------------------|------------------------------------------------|------|--------|
| PLAT084_ALERT_3_C | High wR2 Value (i.e. > 0.25) .....             | 0.31 | Report |
| PLAT213_ALERT_2_C | Atom C1 has ADP max/min Ratio .....            | 3.3  | prolat |
| PLAT213_ALERT_2_C | Atom C3 has ADP max/min Ratio .....            | 3.3  | prolat |
| PLAT220_ALERT_2_C | NonSolvent Resd 1 C Ueq(max)/Ueq(min) Range    | 3.8  | Ratio  |
| PLAT222_ALERT_3_C | NonSolvent Resd 1 H Uiso(max)/Uiso(min) Range  | 4.5  | Ratio  |
| PLAT241_ALERT_2_C | High 'MainMol' Ueq as Compared to Neighbors of | C3   | Check  |

|                   |       |                                           |              |
|-------------------|-------|-------------------------------------------|--------------|
| PLAT241_ALERT_2_C | High  | 'MainMol' Ueq as Compared to Neighbors of | C4 Check     |
| PLAT242_ALERT_2_C | Low   | 'MainMol' Ueq as Compared to Neighbors of | C2 Check     |
| PLAT250_ALERT_2_C | Large | U3/U1 Ratio for <U(i,j)> Tensor(Resd 1)   | 2.6 Note     |
| PLAT341_ALERT_3_C | Low   | Bond Precision on C-C Bonds .....         | 0.01409 Ang. |

## Alert level G

FORMU01\_ALERT\_1\_G There is a discrepancy between the atom counts in the  
     \_chemical\_formula\_sum and \_chemical\_formula\_moiety. This is  
     usually due to the moiety formula being in the wrong format.  
     Atom count from \_chemical\_formula\_sum: C44 H34 Cl9 Fe3 N8  
     Atom count from \_chemical\_formula\_moiety: C44 H34 Cl11 Fe1 N8

|                   |                                                  |              |
|-------------------|--------------------------------------------------|--------------|
| PLAT003_ALERT_2_G | Number of Uiso or Uij Restrained non-H Atoms ... | 10 Report    |
| PLAT007_ALERT_5_G | Number of Unrefined Donor-H Atoms .....          | 1 Report     |
|                   | H1                                               |              |
| PLAT066_ALERT_1_G | Predicted and Reported Tmin&Tmax Range Identical | ? Check      |
| PLAT083_ALERT_2_G | SHELXL Second Parameter in WGHT Unusually Large  | 5.72 Why ?   |
| PLAT171_ALERT_4_G | The CIF-Embedded .res File Contains EADP Records | 1 Report     |
| PLAT177_ALERT_4_G | The CIF-Embedded .res File Contains DELU Records | 1 Report     |
| PLAT178_ALERT_4_G | The CIF-Embedded .res File Contains SIMU Records | 1 Report     |
| PLAT300_ALERT_4_G | Atom Site Occupancy of Fe1 Constrained at        | 0.5 Check    |
| PLAT300_ALERT_4_G | Atom Site Occupancy of Cl1 Constrained at        | 0.5 Check    |
| PLAT301_ALERT_3_G | Main Residue Disorder .....(Resd 1)              | 4% Note      |
| PLAT302_ALERT_4_G | Anion/Solvent/Minor-Residue Disorder (Resd 2)    | 100% Note    |
| PLAT302_ALERT_4_G | Anion/Solvent/Minor-Residue Disorder (Resd 3)    | 100% Note    |
| PLAT304_ALERT_4_G | Non-Integer Number of Atoms in ..... (Resd 2)    | 3.64 Check   |
| PLAT304_ALERT_4_G | Non-Integer Number of Atoms in ..... (Resd 3)    | 1.36 Check   |
| PLAT380_ALERT_4_G | Incorrectly? Oriented X(sp2)-Methyl Moiety ..... | C1 Check     |
| PLAT380_ALERT_4_G | Incorrectly? Oriented X(sp2)-Methyl Moiety ..... | C7 Check     |
| PLAT432_ALERT_2_G | Short Inter X...Y Contact Cl1 ..C3 .             | 3.06 Ang.    |
|                   | -1+x,y,z =                                       | 1_455 Check  |
| PLAT432_ALERT_2_G | Short Inter X...Y Contact Cl1 ..C2 .             | 3.15 Ang.    |
|                   | -1+x,y,z =                                       | 1_455 Check  |
| PLAT432_ALERT_2_G | Short Inter X...Y Contact Cl2 ..C3 .             | 3.23 Ang.    |
|                   | 2-x,-y,1-z =                                     | 2_756 Check  |
| PLAT605_ALERT_4_G | Largest Solvent Accessible VOID in the Structure | 104 A**3     |
| PLAT779_ALERT_4_G | Suspect or Irrelevant (Bond) Angle(s) in CIF ... | 26.92 Deg.   |
|                   | FE1 -N3 -FE1 1_555 1_555 2_655 .....             | # 37 Check   |
| PLAT779_ALERT_4_G | Suspect or Irrelevant (Bond) Angle(s) in CIF ... | 27.38 Deg.   |
|                   | FE1 -N4 -FE1 2_655 1_555 1_555 .....             | # 43 Check   |
| PLAT860_ALERT_3_G | Number of Least-Squares Restraints .....         | 56 Note      |
| PLAT869_ALERT_4_G | ALERTS Related to the Use of SQUEEZE Suppressed  | ! Info       |
| PLAT883_ALERT_1_G | No Info/Value for _atom_sites_solution_primary . | Please Do !  |
| PLAT933_ALERT_2_G | Number of HKL-OMIT Records in Embedded .res File | 9 Note       |
|                   | 1 0 0, 1 3 5, 0 0 6, -2 2 0, 1 4 5, 1 3 6,       |              |
|                   | 2 0 2, 3 3 1, -2 -1 2,                           |              |
| PLAT965_ALERT_2_G | The SHELXL WEIGHT Optimisation has not Converged | Please Check |

0 **ALERT level A** = Most likely a serious problem - resolve or explain  
 3 **ALERT level B** = A potentially serious problem, consider carefully  
 11 **ALERT level C** = Check. Ensure it is not caused by an omission or oversight  
 28 **ALERT level G** = General information/check it is not something unexpected

4 ALERT type 1 CIF construction/syntax error, inconsistent or missing data

16 ALERT type 2 Indicator that the structure model may be wrong or deficient  
6 ALERT type 3 Indicator that the structure quality may be low  
15 ALERT type 4 Improvement, methodology, query or suggestion  
1 ALERT type 5 Informative message, check

---

---

It is advisable to attempt to resolve as many as possible of the alerts in all categories. Often the minor alerts point to easily fixed oversights, errors and omissions in your CIF or refinement strategy, so attention to these fine details can be worthwhile. In order to resolve some of the more serious problems it may be necessary to carry out additional measurements or structure refinements. However, the purpose of your study may justify the reported deviations and the more serious of these should normally be commented upon in the discussion or experimental section of a paper or in the "special\_details" fields of the CIF. checkCIF was carefully designed to identify outliers and unusual parameters, but every test has its limitations and alerts that are not important in a particular case may appear. Conversely, the absence of alerts does not guarantee there are no aspects of the results needing attention. It is up to the individual to critically assess their own results and, if necessary, seek expert advice.

### **Publication of your CIF in IUCr journals**

A basic structural check has been run on your CIF. These basic checks will be run on all CIFs submitted for publication in IUCr journals (*Acta Crystallographica*, *Journal of Applied Crystallography*, *Journal of Synchrotron Radiation*); however, if you intend to submit to *Acta Crystallographica Section C* or *E* or *IUCrData*, you should make sure that full publication checks are run on the final version of your CIF prior to submission.

### **Publication of your CIF in other journals**

Please refer to the *Notes for Authors* of the relevant journal for any special instructions relating to CIF submission.

---

**PLATON version of 06/01/2024; check.def file version of 05/01/2024**

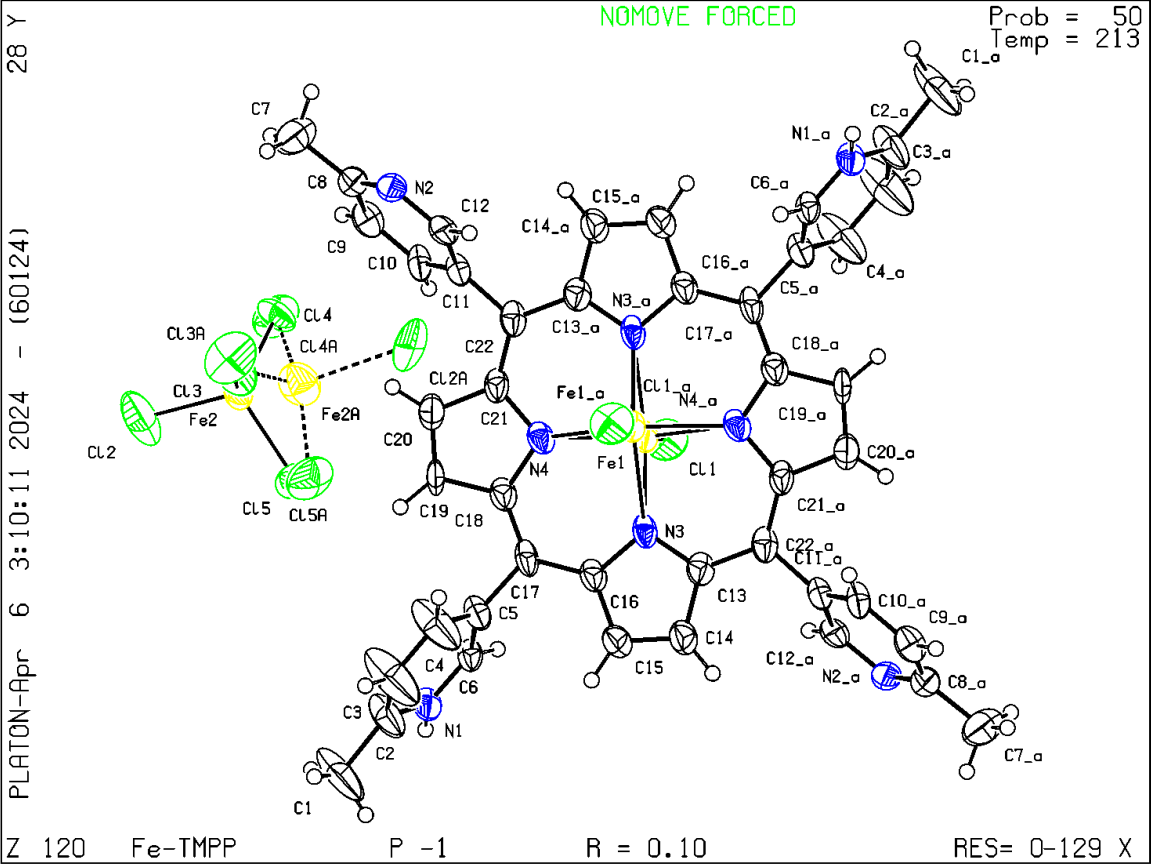

Supplement: Supplementary file 1 [file supplementary]
