# Supplementary material for: [Fe<sup>III</sup>Cl(TMPPH<sub>2</sub>)][Fe<sup>III</sup>Cl<sub>4</sub>]<sub>2</sub>: A Stand-Alone Molecular Nanomedicine that Induces High Cytotoxicity by Ferroptosis
Source: Preprints.org preprint supplement (doi:10.20944/preprints202404.1891.v1), 2024-04-29
Supplement: Supplementary file 2 [file supplementary]

Archive with 3 entries (3 files):
- Supplementary Material.docx
- checkcif.pdf
- FE-TMPP.cif
