# Supplementary material for: [Fe<sup>III</sup>Cl(TMPPH<sub>2</sub>)][Fe<sup>III</sup>Cl<sub>4</sub>]<sub>2</sub>: A Stand-Alone Molecular Nanomedicine that Induces High Cytotoxicity by Ferroptosis
Source: Preprints.org preprint supplement (doi:10.20944/preprints202404.1891.v1), 2024-04-29
Supplement: Supplementary file 2 [file supplementary › FE-TMPP.cif]

data_Fe-TMPP

_audit_update_record
;
2024-04-06 # Formatted by publCIF

;

# publcif _publ_body_element loop start
loop_
_publ_body_element
_publ_body_title
_publ_body_contents

 section 
;
Introduction
; 
;

;
 section 
;
Experimental
; 
;

;
 subsection 
;
Synthesis and crystallization
; 
;

;
 subsection 
;
Refinement
;
;
Crystal data, data collection and structure refinement details are summarized
in Table 1.
;

 section 
;
Results and discussion
; 
;

;
# publcif _publ_body_element loop end


# start Validation Reply Form


_vrf_THETM01_Fe-TMPP
;
PROBLEM: The value of sine(theta_max)/wavelength is less than 0.575
Calculated sin(theta_max)/wavelength = 0.5555
RESPONSE: The crystal exhibits nearly no diffraction at the 
high-resolution (low angle) region. This is likely due to the quick 
evaporation of crystalline solvate during the experiment though low
temperature is used. Refinement with the inclusion of these weak 
data leads to a very high R-value of around 20%. Therefore, 
a resolution cutoff of 0.90 is applied to obtain a reasonable R factor.
;

_vrf_PLAT023_Fe-TMPP
;
PROBLEM: Resolution (too) Low [sin(theta)/Lambda < 0.6].. 0.56 Ang-1
RESPONSE: This alert describes the same issue as that for THETM01.
RESPONSE: The crystal exhibits nearly no diffraction at the 
high-resolution (low angle) region. This is likely due to the quick 
evaporation of crystalline solvate during the experiment though low
temperature is used. Refinement with the inclusion of these weak 
data leads to a very high R-value of around 20%. Therefore, 
a resolution cutoff of 0.90 is applied to obtain a reasonable R factor.
;

_vrf_PLAT094_Fe-TMPP
;
PROBLEM: Ratio of Maximum / Minimum Residual Density .... 6.18 Report
RESPONSE: A residual density (3.02 e\%A^-3^) is identified and such density 
is 1.812 \%A from Cl1 and 2.850 \%A from the disordered Cl2A. Our refinement
of this residual density using a disordered solvate model failed to result in 
any meaningful results. The presence of this residual density might 
be due to the low-quality of the crystal. 
;


_vrf_PLAT097_Fe-TMPP
;
PROBLEM: Large Reported Max. (Positive) Residual Density 3.02 eA-3
RESPONSE: This alert describes the same issue as that for PLAT094.
A residual density (3.02 e\%A^-3^) is identified and such density 
is 1.812 \%A from Cl1 and 2.850 \%A from the disordered Cl2A. Our refinement
of this residual density using a disordered solvate model failed to result in 
any meaningful results. The presence of this residual density might 
be due to the low-quality of the crystal.  
;


# end Validation Reply Form


 
_audit_creation_method            'SHELXL-2016/6'
_shelx_SHELXL_version_number      '2016/6'
_chemical_name_systematic         ?
_chemical_name_common             ?
_chemical_melting_point           ?
_chemical_formula_moiety          
 'C44 H34 Cl Fe N8, 2(Cl4 Fe) [+ solvent]'
_chemical_formula_sum
 'C44 H34 Cl9 Fe3 N8' 
_chemical_formula_weight          1161.39

loop_
 _atom_type_symbol
 _atom_type_description
 _atom_type_scat_dispersion_real
 _atom_type_scat_dispersion_imag
 _atom_type_scat_source
 'C'  'C'   0.0033   0.0016
 'International Tables Vol C Tables 4.2.6.8 and 6.1.1.4'
 'H'  'H'   0.0000   0.0000
 'International Tables Vol C Tables 4.2.6.8 and 6.1.1.4'
 'Cl'  'Cl'   0.1484   0.1585
 'International Tables Vol C Tables 4.2.6.8 and 6.1.1.4'
 'Fe'  'Fe'   0.3463   0.8444
 'International Tables Vol C Tables 4.2.6.8 and 6.1.1.4'
 'N'  'N'   0.0061   0.0033
 'International Tables Vol C Tables 4.2.6.8 and 6.1.1.4'
 
_space_group_crystal_system       triclinic
_space_group_IT_number            2
_space_group_name_H-M_alt         'P -1'
_space_group_name_Hall            '-P 1'
 
_shelx_space_group_comment
;
The symmetry employed for this shelxl refinement is uniquely defined
by the following loop, which should always be used as a source of
symmetry information in preference to the above space-group names.
They are only intended as comments.
;
 
loop_
 _space_group_symop_operation_xyz
 'x, y, z'
 '-x, -y, -z'
 
_cell_length_a                    9.5980(6)
_cell_length_b                    11.0408(7)
_cell_length_c                    14.4682(10)
_cell_angle_alpha                 70.702(3)
_cell_angle_beta                  86.792(3)
_cell_angle_gamma                 75.171(2)
_cell_volume                      1398.16(16)
_cell_formula_units_Z             1
_cell_measurement_temperature     213(2)
_cell_measurement_reflns_used      4275
_cell_measurement_theta_min        2.62
_cell_measurement_theta_max       21.16

 
_exptl_crystal_description        rod
_exptl_crystal_colour             dark-red
_exptl_crystal_density_meas       ?
_exptl_crystal_density_method     ?
_exptl_crystal_density_diffrn     1.379          
_exptl_crystal_F_000              585
_exptl_transmission_factor_min    ?
_exptl_transmission_factor_max    ?
_exptl_crystal_size_max           0.300
_exptl_crystal_size_mid           0.050
_exptl_crystal_size_min           0.050
_exptl_absorpt_coefficient_mu     1.234
_shelx_estimated_absorpt_T_min    0.708
_shelx_estimated_absorpt_T_max    0.941
_exptl_absorpt_correction_type    multi-scan
_exptl_absorpt_correction_T_min   0.929
_exptl_absorpt_correction_T_max   0.940
_exptl_absorpt_process_details    
;
 Sheldrick, G.M. SADABS (Program for Scaling and Correction of Area Detector
 Data), version 2008/1; University of G\"ottingen: G\"ottingen, Germany, 2008.
;
_exptl_absorpt_special_details    ?
_diffrn_ambient_temperature       213(2)
_diffrn_radiation_wavelength      0.71073
_diffrn_radiation_type            MoK\a
_diffrn_source                    ?
_diffrn_measurement_device_type   'Bruker Apex IIII'
_diffrn_measurement_method        'phi and omega scans'
_diffrn_detector_area_resol_mean  ?
_diffrn_standards_number          0
_diffrn_standards_interval_count  0
_diffrn_standards_interval_time   0
_diffrn_standards_decay_%         0
_diffrn_reflns_number             29635
_diffrn_reflns_av_unetI/netI      0.0515
_diffrn_reflns_av_R_equivalents   0.0778
_diffrn_reflns_limit_h_min        -10
_diffrn_reflns_limit_h_max        10
_diffrn_reflns_limit_k_min        -12
_diffrn_reflns_limit_k_max        12
_diffrn_reflns_limit_l_min        -16
_diffrn_reflns_limit_l_max        16
_diffrn_reflns_theta_min          1.492
_diffrn_reflns_theta_max          23.255
_diffrn_reflns_theta_full         23.255
_diffrn_measured_fraction_theta_max   0.998
_diffrn_measured_fraction_theta_full  0.998
_diffrn_reflns_Laue_measured_fraction_max    0.998
_diffrn_reflns_Laue_measured_fraction_full   0.998
_diffrn_reflns_point_group_measured_fraction_max   0.998
_diffrn_reflns_point_group_measured_fraction_full  0.998
_reflns_number_total              4006
_reflns_number_gt                 2844
_reflns_threshold_expression      'I > 2\s(I)'
_reflns_Friedel_coverage          0.000
_reflns_Friedel_fraction_max      .
_reflns_Friedel_fraction_full     .
 
_reflns_special_details
;
 Reflections were merged by SHELXL according to the crystal
 class for the calculation of statistics and refinement.
 
 Structure factors included contributions from the .fab file.
 
 _reflns_Friedel_fraction is defined as the number of unique
 Friedel pairs measured divided by the number that would be
 possible theoretically, ignoring centric projections and
 systematic absences.
;
 
_computing_data_collection        'Bruker Apex IIII'
_computing_cell_refinement        'Bruker Apex IIII'
_computing_data_reduction         'Bruker Apex IIII'
_computing_structure_solution     'SHELXL-2016/6 (Sheldrick, 2016)'
_computing_structure_refinement   'SHELXL-2016/6 (Sheldrick, 2016)'
_computing_molecular_graphics     'SHELXL-2016/6 (Sheldrick, 2016)'
_computing_publication_material   'publCIF (Westrip, 2010)'
_refine_special_details           ?
_refine_ls_structure_factor_coef  Fsqd
_refine_ls_matrix_type            full
_refine_ls_weighting_scheme       calc
_refine_ls_weighting_details
'w=1/[\s^2^(Fo^2^)+(0.1910P)^2^+5.7187P] where P=(Fo^2^+2Fc^2^)/3'
_atom_sites_solution_primary      ?
_atom_sites_solution_secondary    ?
_atom_sites_solution_hydrogens    geom
_refine_ls_hydrogen_treatment     constr
_refine_ls_extinction_method      none
_refine_ls_extinction_coef        .
_refine_ls_number_reflns          4006
_refine_ls_number_parameters      339
_refine_ls_number_restraints      56
_refine_ls_R_factor_all           0.1343
_refine_ls_R_factor_gt            0.1007
_refine_ls_wR_factor_ref          0.3123
_refine_ls_wR_factor_gt           0.2811
_refine_ls_goodness_of_fit_ref    1.057
_refine_ls_restrained_S_all       1.055
_refine_ls_shift/su_max           0.000
_refine_ls_shift/su_mean          0.000
 
loop_
 _atom_site_label
 _atom_site_type_symbol
 _atom_site_fract_x
 _atom_site_fract_y
 _atom_site_fract_z
 _atom_site_U_iso_or_equiv
 _atom_site_adp_type
 _atom_site_occupancy
 _atom_site_site_symmetry_order  
 _atom_site_calc_flag
 _atom_site_refinement_flags_posn
 _atom_site_refinement_flags_adp
 _atom_site_refinement_flags_occupancy
 _atom_site_disorder_assembly
 _atom_site_disorder_group
Fe1 Fe 0.4919(3) -0.0448(2) 0.01023(17) 0.0358(7) Uani 0.5 1 d . . P . .
Cl1 Cl 0.4202(6) -0.2285(5) 0.0721(4) 0.0671(15) Uani 0.5 1 d . . P . .
Fe2 Fe 0.79495(18) 0.26926(19) 0.41311(13) 0.0452(7) Uani 0.728(4) 1 d . U P A 1
Cl2 Cl 0.8996(5) 0.1927(6) 0.5581(3) 0.1039(18) Uani 0.728(4) 1 d . U P A 1
Cl3 Cl 0.7913(13) 0.4789(11) 0.3453(9) 0.093(3) Uani 0.728(4) 1 d . U P A 1
Cl4 Cl 0.5761(7) 0.2427(9) 0.4346(7) 0.0545(14) Uani 0.728(4) 1 d . U P A 1
Cl5 Cl 0.9129(6) 0.1372(8) 0.3382(5) 0.089(2) Uani 0.728(4) 1 d . U P A 1
Fe2A Fe 0.7368(7) 0.2895(7) 0.3304(5) 0.074(2) Uani 0.272(4) 1 d . U P A 2
Cl2A Cl 0.5948(12) 0.3769(11) 0.1736(6) 0.070(3) Uani 0.272(4) 1 d . U P A 2
Cl3A Cl 0.804(4) 0.453(3) 0.348(3) 0.106(8) Uani 0.272(4) 1 d . U P A 2
Cl4A Cl 0.577(3) 0.234(3) 0.439(2) 0.084(4) Uani 0.272(4) 1 d . U P A 2
Cl5A Cl 0.913(3) 0.184(2) 0.2996(12) 0.084(4) Uani 0.272(4) 1 d . U P A 2
C3 C 1.1954(16) -0.1691(11) 0.2202(14) 0.127(7) Uani 1 1 d . . . . .
H3A H 1.254665 -0.113434 0.220854 0.153 Uiso 1 1 calc R U . . .
N2 N 0.2322(7) 0.3540(6) 0.3258(5) 0.0387(17) Uani 1 1 d . . . . .
N3 N 0.6906(7) -0.1091(6) -0.0276(5) 0.0370(16) Uani 1 1 d . . . . .
N4 N 0.5805(7) -0.0167(6) 0.1304(5) 0.0403(17) Uani 1 1 d . . . . .
C1 C 1.3932(15) -0.3662(13) 0.3124(13) 0.123(7) Uani 1 1 d . . . . .
H1A H 1.440830 -0.297900 0.310626 0.184 Uiso 1 1 calc R U . . .
H1B H 1.384374 -0.418943 0.379921 0.184 Uiso 1 1 calc R U . . .
H1C H 1.449486 -0.422779 0.277582 0.184 Uiso 1 1 calc R U . . .
C2 C 1.2442(12) -0.3019(10) 0.2639(9) 0.073(4) Uani 1 1 d . . . . .
N1 N 1.1606(8) -0.3799(7) 0.2589(5) 0.0439(18) Uani 1 1 d . . . . .
H1 H 1.191569 -0.465516 0.285108 0.053 Uiso 1 1 calc R U . . .
C6 C 1.0323(9) -0.3291(7) 0.2149(5) 0.0343(19) Uani 1 1 d . . . . .
H6A H 0.977593 -0.387943 0.213309 0.041 Uiso 1 1 calc R U . . .
C5 C 0.9738(9) -0.1972(8) 0.1718(6) 0.043(2) Uani 1 1 d . . . . .
C4 C 1.0599(14) -0.1135(10) 0.1745(12) 0.101(5) Uani 1 1 d . . . . .
H4A H 1.026425 -0.021078 0.145853 0.121 Uiso 1 1 calc R U . . .
C7 C 0.1805(13) 0.3484(11) 0.4911(8) 0.069(3) Uani 1 1 d . . . . .
H7A H 0.175413 0.284337 0.555152 0.104 Uiso 1 1 calc R U . . .
H7B H 0.252318 0.395231 0.493312 0.104 Uiso 1 1 calc R U . . .
H7C H 0.087187 0.411226 0.472475 0.104 Uiso 1 1 calc R U . . .
C8 C 0.2210(9) 0.2782(8) 0.4178(6) 0.041(2) Uani 1 1 d . . . . .
C9 C 0.2509(9) 0.1427(9) 0.4376(7) 0.045(2) Uani 1 1 d . . . . .
H9A H 0.240041 0.087545 0.501366 0.054 Uiso 1 1 calc R U . . .
C10 C 0.2962(9) 0.0875(8) 0.3656(6) 0.040(2) Uani 1 1 d . . . . .
H10A H 0.317088 -0.004953 0.380427 0.048 Uiso 1 1 calc R U . . .
C11 C 0.3113(9) 0.1680(7) 0.2709(6) 0.0351(19) Uani 1 1 d . . . . .
C12 C 0.2766(9) 0.3018(8) 0.2530(6) 0.039(2) Uani 1 1 d . . . . .
H12A H 0.283489 0.358802 0.189227 0.047 Uiso 1 1 calc R U . . .
C13 C 0.7259(9) -0.1448(8) -0.1101(6) 0.039(2) Uani 1 1 d . . . . .
C14 C 0.8740(10) -0.2166(9) -0.1031(6) 0.046(2) Uani 1 1 d . . . . .
H14A H 0.923845 -0.252506 -0.149631 0.055 Uiso 1 1 calc R U . . .
C15 C 0.9289(10) -0.2233(9) -0.0171(7) 0.049(2) Uani 1 1 d . . . . .
H15A H 1.024364 -0.263540 0.006962 0.059 Uiso 1 1 calc R U . . .
C16 C 0.8150(9) -0.1580(8) 0.0302(6) 0.039(2) Uani 1 1 d . . . . .
C17 C 0.8284(10) -0.1415(8) 0.1211(6) 0.040(2) Uani 1 1 d . . . . .
C18 C 0.7193(9) -0.0757(8) 0.1663(6) 0.042(2) Uani 1 1 d . . . . .
C19 C 0.7345(11) -0.0601(10) 0.2586(7) 0.054(3) Uani 1 1 d . . . . .
H19A H 0.817901 -0.094911 0.299465 0.065 Uiso 1 1 calc R U . . .
C20 C 0.6095(11) 0.0125(10) 0.2765(7) 0.057(3) Uani 1 1 d . . . . .
H20A H 0.589867 0.040803 0.331467 0.068 Uiso 1 1 calc R U . . .
C21 C 0.5103(10) 0.0402(8) 0.1984(6) 0.040(2) Uani 1 1 d . . . . .
C22 C 0.3676(9) 0.1150(7) 0.1895(6) 0.038(2) Uani 1 1 d . . . . .
 
loop_
 _atom_site_aniso_label
 _atom_site_aniso_U_11
 _atom_site_aniso_U_22
 _atom_site_aniso_U_33
 _atom_site_aniso_U_23
 _atom_site_aniso_U_13
 _atom_site_aniso_U_12
Fe1 0.0480(14) 0.0247(13) 0.0314(13) -0.0091(13) -0.0119(10) -0.0005(13)
Cl1 0.081(4) 0.036(3) 0.083(4) -0.017(3) 0.000(3) -0.016(2)
Fe2 0.0370(10) 0.0625(13) 0.0449(12) -0.0226(9) 0.0004(8) -0.0206(9)
Cl2 0.067(3) 0.176(5) 0.064(3) -0.013(3) -0.017(2) -0.052(3)
Cl3 0.114(6) 0.081(5) 0.108(5) -0.039(4) 0.039(4) -0.064(5)
Cl4 0.0275(18) 0.056(3) 0.081(4) -0.020(2) -0.0110(19) -0.0127(18)
Cl5 0.048(2) 0.134(6) 0.125(6) -0.092(5) 0.018(4) -0.028(3)
Fe2A 0.063(4) 0.087(5) 0.075(5) -0.020(3) 0.003(3) -0.030(3)
Cl2A 0.105(7) 0.101(8) 0.030(4) -0.026(4) 0.039(4) -0.075(6)
Cl3A 0.111(14) 0.066(10) 0.135(17) -0.014(9) -0.049(12) -0.025(8)
Cl4A 0.097(8) 0.091(9) 0.050(6) -0.016(6) 0.026(5) -0.015(6)
Cl5A 0.097(8) 0.091(9) 0.050(6) -0.016(6) 0.026(5) -0.015(6)
C3 0.104(10) 0.036(6) 0.238(19) -0.028(9) -0.105(12) -0.009(6)
N2 0.041(4) 0.031(4) 0.037(4) -0.010(3) -0.005(3) 0.002(3)
N3 0.051(4) 0.026(3) 0.030(4) -0.005(3) -0.016(3) -0.004(3)
N4 0.046(4) 0.028(4) 0.041(4) -0.009(3) -0.017(3) 0.000(3)
C1 0.095(10) 0.066(8) 0.197(17) -0.041(10) -0.108(11) 0.017(7)
C2 0.068(7) 0.044(6) 0.110(9) -0.027(6) -0.053(7) -0.003(5)
N1 0.055(5) 0.028(4) 0.042(4) -0.011(3) -0.019(4) 0.006(3)
C6 0.046(5) 0.024(4) 0.033(4) -0.009(3) -0.010(4) -0.008(4)
C5 0.047(5) 0.033(5) 0.047(5) -0.012(4) -0.020(4) -0.005(4)
C4 0.088(9) 0.027(5) 0.178(14) -0.018(7) -0.082(9) 0.000(6)
C7 0.081(8) 0.064(7) 0.056(6) -0.025(6) 0.013(6) -0.003(6)
C8 0.041(5) 0.042(5) 0.039(5) -0.015(4) -0.004(4) -0.003(4)
C9 0.046(5) 0.044(5) 0.041(5) -0.003(4) -0.006(4) -0.017(4)
C10 0.056(5) 0.031(4) 0.033(5) -0.008(4) -0.017(4) -0.010(4)
C11 0.042(5) 0.027(4) 0.036(5) -0.008(4) -0.015(4) -0.007(4)
C12 0.038(5) 0.035(5) 0.031(4) -0.001(4) -0.011(4) 0.003(4)
C13 0.053(5) 0.028(4) 0.031(5) -0.005(4) -0.010(4) -0.003(4)
C14 0.051(5) 0.045(5) 0.037(5) -0.011(4) -0.013(4) -0.004(4)
C15 0.045(5) 0.049(5) 0.049(6) -0.018(4) -0.016(4) 0.002(4)
C16 0.045(5) 0.032(4) 0.034(5) -0.006(4) -0.013(4) -0.004(4)
C17 0.056(5) 0.028(4) 0.030(4) -0.002(4) -0.021(4) -0.008(4)
C18 0.050(5) 0.031(4) 0.041(5) -0.012(4) -0.017(4) 0.000(4)
C19 0.062(6) 0.063(6) 0.042(5) -0.034(5) -0.029(4) 0.006(5)
C20 0.065(7) 0.057(6) 0.050(6) -0.031(5) -0.023(5) 0.005(5)
C21 0.056(6) 0.027(4) 0.039(5) -0.015(4) -0.016(4) -0.004(4)
C22 0.056(5) 0.026(4) 0.029(4) -0.003(3) -0.011(4) -0.011(4)
 
_geom_special_details
;
 All esds (except the esd in the dihedral angle between two l.s. planes)
 are estimated using the full covariance matrix.  The cell esds are taken
 into account individually in the estimation of esds in distances, angles
 and torsion angles; correlations between esds in cell parameters are only
 used when they are defined by crystal symmetry.  An approximate (isotropic)
 treatment of cell esds is used for estimating esds involving l.s. planes.
;
 
loop_
 _geom_bond_atom_site_label_1
 _geom_bond_atom_site_label_2
 _geom_bond_distance
 _geom_bond_site_symmetry_2
 _geom_bond_publ_flag
Fe1 Fe1 0.985(4) 2_655 ?
Fe1 N3 1.972(7) . ?
Fe1 N4 2.022(7) 2_655 ?
Fe1 N4 2.121(7) . ?
Fe1 N3 2.175(7) 2_655 ?
Fe1 Cl1 2.199(5) . ?
Fe2 Cl5 2.154(7) . ?
Fe2 Cl2 2.180(4) . ?
Fe2 Cl4 2.186(7) . ?
Fe2 Cl3 2.187(10) . ?
Fe2A Cl5A 1.91(2) . ?
Fe2A Cl3A 2.16(3) . ?
Fe2A Cl4A 2.18(3) . ?
Fe2A Cl2A 2.483(12) . ?
C3 C2 1.357(15) . ?
C3 C4 1.388(15) . ?
C3 H3A 0.9400 . ?
N2 C8 1.334(11) . ?
N2 C12 1.359(11) . ?
N3 C13 1.375(10) . ?
N3 C16 1.379(10) . ?
N4 C18 1.370(11) . ?
N4 C21 1.391(11) . ?
C1 C2 1.517(14) . ?
C1 H1A 0.9700 . ?
C1 H1B 0.9700 . ?
C1 H1C 0.9700 . ?
C2 N1 1.339(12) . ?
N1 C6 1.317(10) . ?
N1 H1 0.8700 . ?
C6 C5 1.359(11) . ?
C6 H6A 0.9400 . ?
C5 C4 1.398(14) . ?
C5 C17 1.497(11) . ?
C4 H4A 0.9400 . ?
C7 C8 1.489(13) . ?
C7 H7A 0.9700 . ?
C7 H7B 0.9700 . ?
C7 H7C 0.9700 . ?
C8 C9 1.382(12) . ?
C9 C10 1.370(12) . ?
C9 H9A 0.9400 . ?
C10 C11 1.389(12) . ?
C10 H10A 0.9400 . ?
C11 C12 1.365(11) . ?
C11 C22 1.498(12) . ?
C12 H12A 0.9400 . ?
C13 C22 1.396(11) 2_655 ?
C13 C14 1.430(12) . ?
C14 C15 1.350(12) . ?
C14 H14A 0.9400 . ?
C15 C16 1.422(12) . ?
C15 H15A 0.9400 . ?
C16 C17 1.403(11) . ?
C17 C18 1.379(12) . ?
C18 C19 1.422(12) . ?
C19 C20 1.326(13) . ?
C19 H19A 0.9400 . ?
C20 C21 1.421(12) . ?
C20 H20A 0.9400 . ?
C21 C22 1.395(12) . ?
 
loop_
 _geom_angle_atom_site_label_1
 _geom_angle_atom_site_label_2
 _geom_angle_atom_site_label_3
 _geom_angle
 _geom_angle_site_symmetry_1
 _geom_angle_site_symmetry_3
 _geom_angle_publ_flag
Fe1 Fe1 N3 88.1(3) 2_655 . ?
Fe1 Fe1 N4 81.9(3) 2_655 2_655 ?
N3 Fe1 N4 91.1(3) . 2_655 ?
Fe1 Fe1 N4 70.7(3) 2_655 . ?
N3 Fe1 N4 88.1(3) . . ?
N4 Fe1 N4 152.62(14) 2_655 . ?
Fe1 Fe1 N3 65.0(3) 2_655 2_655 ?
N3 Fe1 N3 153.08(15) . 2_655 ?
N4 Fe1 N3 85.4(3) 2_655 2_655 ?
N4 Fe1 N3 83.1(3) . 2_655 ?
Fe1 Fe1 Cl1 168.6(4) 2_655 . ?
N3 Fe1 Cl1 102.7(3) . . ?
N4 Fe1 Cl1 101.3(3) 2_655 . ?
N4 Fe1 Cl1 105.6(3) . . ?
N3 Fe1 Cl1 104.2(3) 2_655 . ?
Cl5 Fe2 Cl2 104.3(3) . . ?
Cl5 Fe2 Cl4 108.4(3) . . ?
Cl2 Fe2 Cl4 106.5(3) . . ?
Cl5 Fe2 Cl3 116.2(4) . . ?
Cl2 Fe2 Cl3 110.0(4) . . ?
Cl4 Fe2 Cl3 110.9(4) . . ?
Cl5A Fe2A Cl3A 102.3(13) . . ?
Cl5A Fe2A Cl4A 130.5(11) . . ?
Cl3A Fe2A Cl4A 109.7(15) . . ?
Cl5A Fe2A Cl2A 102.7(7) . . ?
Cl3A Fe2A Cl2A 107.1(9) . . ?
Cl4A Fe2A Cl2A 102.7(8) . . ?
C2 C3 C4 121.4(11) . . ?
C2 C3 H3A 119.3 . . ?
C4 C3 H3A 119.3 . . ?
C8 N2 C12 122.2(7) . . ?
C13 N3 C16 105.6(7) . . ?
C13 N3 Fe1 124.6(5) . . ?
C16 N3 Fe1 128.0(6) . . ?
C13 N3 Fe1 127.5(5) . 2_655 ?
C16 N3 Fe1 124.0(5) . 2_655 ?
Fe1 N3 Fe1 26.92(15) . 2_655 ?
C18 N4 C21 105.8(6) . . ?
C18 N4 Fe1 127.7(6) . 2_655 ?
C21 N4 Fe1 122.2(5) . 2_655 ?
C18 N4 Fe1 124.1(6) . . ?
C21 N4 Fe1 129.1(5) . . ?
Fe1 N4 Fe1 27.38(14) 2_655 . ?
C2 C1 H1A 109.5 . . ?
C2 C1 H1B 109.5 . . ?
H1A C1 H1B 109.5 . . ?
C2 C1 H1C 109.5 . . ?
H1A C1 H1C 109.5 . . ?
H1B C1 H1C 109.5 . . ?
N1 C2 C3 118.4(9) . . ?
N1 C2 C1 118.7(9) . . ?
C3 C2 C1 122.7(10) . . ?
C6 N1 C2 121.0(7) . . ?
C6 N1 H1 119.5 . . ?
C2 N1 H1 119.5 . . ?
N1 C6 C5 124.2(8) . . ?
N1 C6 H6A 117.9 . . ?
C5 C6 H6A 117.9 . . ?
C6 C5 C4 116.0(8) . . ?
C6 C5 C17 123.4(7) . . ?
C4 C5 C17 120.6(8) . . ?
C3 C4 C5 118.9(9) . . ?
C3 C4 H4A 120.5 . . ?
C5 C4 H4A 120.5 . . ?
C8 C7 H7A 109.5 . . ?
C8 C7 H7B 109.5 . . ?
H7A C7 H7B 109.5 . . ?
C8 C7 H7C 109.5 . . ?
H7A C7 H7C 109.5 . . ?
H7B C7 H7C 109.5 . . ?
N2 C8 C9 117.9(8) . . ?
N2 C8 C7 116.3(8) . . ?
C9 C8 C7 125.7(8) . . ?
C10 C9 C8 121.0(8) . . ?
C10 C9 H9A 119.5 . . ?
C8 C9 H9A 119.5 . . ?
C9 C10 C11 120.0(8) . . ?
C9 C10 H10A 120.0 . . ?
C11 C10 H10A 120.0 . . ?
C12 C11 C10 117.5(8) . . ?
C12 C11 C22 119.2(7) . . ?
C10 C11 C22 123.3(7) . . ?
N2 C12 C11 121.2(7) . . ?
N2 C12 H12A 119.4 . . ?
C11 C12 H12A 119.4 . . ?
N3 C13 C22 125.5(8) . 2_655 ?
N3 C13 C14 109.8(7) . . ?
C22 C13 C14 124.7(8) 2_655 . ?
C15 C14 C13 107.3(8) . . ?
C15 C14 H14A 126.4 . . ?
C13 C14 H14A 126.4 . . ?
C14 C15 C16 107.1(8) . . ?
C14 C15 H15A 126.5 . . ?
C16 C15 H15A 126.5 . . ?
N3 C16 C17 124.8(8) . . ?
N3 C16 C15 110.2(7) . . ?
C17 C16 C15 124.9(8) . . ?
C18 C17 C16 125.2(8) . . ?
C18 C17 C5 117.5(7) . . ?
C16 C17 C5 117.3(8) . . ?
N4 C18 C17 125.8(8) . . ?
N4 C18 C19 109.7(8) . . ?
C17 C18 C19 124.5(8) . . ?
C20 C19 C18 107.5(8) . . ?
C20 C19 H19A 126.3 . . ?
C18 C19 H19A 126.3 . . ?
C19 C20 C21 108.4(8) . . ?
C19 C20 H20A 125.8 . . ?
C21 C20 H20A 125.8 . . ?
N4 C21 C22 125.4(7) . . ?
N4 C21 C20 108.6(7) . . ?
C22 C21 C20 126.0(8) . . ?
C21 C22 C13 124.7(8) . 2_655 ?
C21 C22 C11 117.5(7) . . ?
C13 C22 C11 117.8(7) 2_655 . ?
 
_refine_diff_density_max    3.021
_refine_diff_density_min   -0.489
_refine_diff_density_rms    0.150


# SQUEEZE RESULTS (Version = 270923)
# Note: Data are Listed for all Voids in the P1 Unit Cell
# i.e. Centre of Gravity, Solvent Accessible Volume,
# Recovered number of Electrons in the Void and
# Details about the Squeezed Material
loop_
  _platon_squeeze_void_nr
  _platon_squeeze_void_average_x
  _platon_squeeze_void_average_y
  _platon_squeeze_void_average_z
  _platon_squeeze_void_volume
  _platon_squeeze_void_count_electrons
  _platon_squeeze_void_content
   1  0.000  0.500  0.000       108        25 ' '
_platon_squeeze_void_probe_radius                  1.20
_platon_squeeze_details                           
;
A small amount of spatially delocalized electron density 
in the lattice was found but acceptable refinement results
could not be obtained for this electron density. The solvent
contribution was then modeled using SQUEEZE in the 
Platon program suite
;

_shelx_res_file
;
TITL mo_B20230713A_0m in P-1
    t.res
    created by SHELXL-2016/6 at 19:59:26 on 05-Apr-2024
CELL 0.71073   9.59800  11.04080  14.46820  70.7020  86.7925  75.1707
ZERR 1.00000 0.00060 0.00070 0.00100 0.0026 0.0026 0.0024
LATT  1
SFAC C H Cl Fe N
UNIT 44 34 9 3 8
TEMP -60.000
SIZE 0.05 0.05 0.30
L.S. 50
BOND $H
ACTA
FMAP 2
PLAN 10
LIST 4
OMIT     1   0   0
OMIT     1   3   5
OMIT     0   0   6
OMIT    -2   2   0
OMIT     1   4   5
OMIT     1   3   6
OMIT     2   0   2
OMIT     3   3   1
OMIT    -2  -1   2

EADP CL4A CL5A

SIMU FE2 > CL5A
DELU FE2 > CL5A

SHEL 99999 0.90
ABIN
WGHT    0.191000    5.718700
FVAR       0.19471   0.72796   0.61720
FE1   4    0.491886   -0.044807    0.010235    10.50000    0.04801    0.02467 =
         0.03139   -0.00915   -0.01187   -0.00051
CL1   3    0.420175   -0.228499    0.072096    10.50000    0.08094    0.03615 =
         0.08336   -0.01695    0.00012   -0.01645

PART   1
FE2   4    0.794945    0.269262    0.413108    21.00000    0.03697    0.06249 =
         0.04493   -0.02264    0.00040   -0.02059
CL2   3    0.899556    0.192727    0.558057    21.00000    0.06702    0.17562 =
         0.06388   -0.01309   -0.01714   -0.05221
CL3   3    0.791327    0.478889    0.345283    21.00000    0.11415    0.08106 =
         0.10802   -0.03892    0.03873   -0.06353
CL4   3    0.576088    0.242720    0.434564    21.00000    0.02748    0.05635 =
         0.08087   -0.02039   -0.01103   -0.01270
CL5   3    0.912869    0.137224    0.338240    21.00000    0.04755    0.13378 =
         0.12509   -0.09203    0.01824   -0.02837
PART   2
FE2A  4    0.736838    0.289477    0.330412   -21.00000    0.06304    0.08651 =
         0.07452   -0.01950    0.00345   -0.02960
CL2A  3    0.594833    0.376911    0.173584   -21.00000    0.10504    0.10132 =
         0.02984   -0.02618    0.03872   -0.07529
CL3A  3    0.804265    0.452634    0.348410   -21.00000    0.11091    0.06587 =
         0.13498   -0.01401   -0.04912   -0.02472
CL4A  3    0.577146    0.233802    0.438797   -21.00000    0.09738    0.09116 =
         0.05021   -0.01641    0.02633   -0.01522
CL5A  3    0.913045    0.184423    0.299620   -21.00000    0.09738    0.09116 =
         0.05021   -0.01641    0.02633   -0.01522
PART   0

C3    1    1.195424   -0.169051    0.220201    11.00000    0.10380    0.03596 =
         0.23751   -0.02784   -0.10547   -0.00908
AFIX  43
H3A   2    1.254665   -0.113434    0.220854    11.00000   -1.20000
AFIX   0
N2    5    0.232198    0.354005    0.325761    11.00000    0.04102    0.03079 =
         0.03742   -0.00960   -0.00469    0.00201
N3    5    0.690592   -0.109147   -0.027649    11.00000    0.05122    0.02622 =
         0.02958   -0.00549   -0.01617   -0.00391
N4    5    0.580521   -0.016715    0.130389    11.00000    0.04622    0.02817 =
         0.04139   -0.00856   -0.01684   -0.00021
C1    1    1.393160   -0.366182    0.312386    11.00000    0.09465    0.06647 =
         0.19724   -0.04096   -0.10820    0.01713
AFIX  33
H1A   2    1.440830   -0.297900    0.310626    11.00000   -1.50000
H1B   2    1.384374   -0.418943    0.379921    11.00000   -1.50000
H1C   2    1.449486   -0.422779    0.277582    11.00000   -1.50000
AFIX   0
C2    1    1.244246   -0.301935    0.263947    11.00000    0.06765    0.04351 =
         0.11049   -0.02663   -0.05290   -0.00322
N1    5    1.160639   -0.379933    0.258918    11.00000    0.05512    0.02783 =
         0.04153   -0.01089   -0.01912    0.00555
AFIX  43
H1    2    1.191569   -0.465516    0.285108    11.00000   -1.20000
AFIX   0
C6    1    1.032280   -0.329135    0.214941    11.00000    0.04590    0.02415 =
         0.03342   -0.00918   -0.00967   -0.00758
AFIX  43
H6A   2    0.977593   -0.387943    0.213309    11.00000   -1.20000
AFIX   0
C5    1    0.973846   -0.197172    0.171782    11.00000    0.04669    0.03347 =
         0.04703   -0.01246   -0.02042   -0.00492
C4    1    1.059877   -0.113489    0.174510    11.00000    0.08825    0.02689 =
         0.17815   -0.01790   -0.08209   -0.00024
AFIX  43
H4A   2    1.026425   -0.021078    0.145853    11.00000   -1.20000
AFIX   0
C7    1    0.180451    0.348363    0.491072    11.00000    0.08089    0.06443 =
         0.05639   -0.02532    0.01324   -0.00252
AFIX  33
H7A   2    0.175413    0.284337    0.555152    11.00000   -1.50000
H7B   2    0.252318    0.395231    0.493312    11.00000   -1.50000
H7C   2    0.087187    0.411226    0.472475    11.00000   -1.50000
AFIX   0
C8    1    0.221020    0.278221    0.417835    11.00000    0.04071    0.04171 =
         0.03856   -0.01459   -0.00434   -0.00338
C9    1    0.250934    0.142701    0.437589    11.00000    0.04579    0.04372 =
         0.04147   -0.00263   -0.00615   -0.01677
AFIX  43
H9A   2    0.240041    0.087545    0.501366    11.00000   -1.20000
AFIX   0
C10   1    0.296222    0.087497    0.365649    11.00000    0.05592    0.03059 =
         0.03334   -0.00837   -0.01665   -0.00981
AFIX  43
H10A  2    0.317088   -0.004953    0.380427    11.00000   -1.20000
AFIX   0
C11   1    0.311329    0.168024    0.270901    11.00000    0.04151    0.02658 =
         0.03635   -0.00829   -0.01479   -0.00651
C12   1    0.276579    0.301771    0.253041    11.00000    0.03843    0.03509 =
         0.03060   -0.00093   -0.01063    0.00252
AFIX  43
H12A  2    0.283489    0.358802    0.189227    11.00000   -1.20000
AFIX   0
C13   1    0.725875   -0.144792   -0.110107    11.00000    0.05251    0.02771 =
         0.03088   -0.00528   -0.01008   -0.00325
C14   1    0.873976   -0.216613   -0.103053    11.00000    0.05110    0.04546 =
         0.03680   -0.01127   -0.01302   -0.00446
AFIX  43
H14A  2    0.923845   -0.252506   -0.149631    11.00000   -1.20000
AFIX   0
C15   1    0.928870   -0.223296   -0.017086    11.00000    0.04459    0.04909 =
         0.04868   -0.01772   -0.01593    0.00234
AFIX  43
H15A  2    1.024364   -0.263540    0.006962    11.00000   -1.20000
AFIX   0
C16   1    0.815017   -0.157991    0.030215    11.00000    0.04489    0.03224 =
         0.03380   -0.00626   -0.01349   -0.00355
C17   1    0.828425   -0.141521    0.121083    11.00000    0.05636    0.02780 =
         0.02961   -0.00157   -0.02056   -0.00785
C18   1    0.719276   -0.075726    0.166299    11.00000    0.04954    0.03116 =
         0.04055   -0.01207   -0.01665    0.00004
C19   1    0.734496   -0.060119    0.258587    11.00000    0.06155    0.06291 =
         0.04223   -0.03381   -0.02884    0.00560
AFIX  43
H19A  2    0.817901   -0.094911    0.299465    11.00000   -1.20000
AFIX   0
C20   1    0.609511    0.012501    0.276475    11.00000    0.06550    0.05673 =
         0.04951   -0.03078   -0.02273    0.00466
AFIX  43
H20A  2    0.589867    0.040803    0.331467    11.00000   -1.20000
AFIX   0
C21   1    0.510348    0.040244    0.198361    11.00000    0.05607    0.02723 =
         0.03915   -0.01478   -0.01590   -0.00391
C22   1    0.367589    0.114976    0.189546    11.00000    0.05592    0.02555 =
         0.02898   -0.00281   -0.01095   -0.01062

HKLF 4


REM  mo_B20230713A_0m in P-1
REM R1 =  0.1007 for    2844 Fo > 4sig(Fo)  and  0.1343 for all    4006 data
REM    339 parameters refined using     56 restraints

END

WGHT      0.1932      5.8819

REM Highest difference peak  3.021,  deepest hole -0.489,  1-sigma level  0.150
Q1    1   0.3447 -0.3007 -0.0027  11.00000  0.05    3.02
Q2    1   0.6729  0.3216  0.1629  11.00000  0.05    1.51
Q3    1   0.5559  0.4052  0.1475  11.00000  0.05    1.28
Q4    1   0.6938  0.3629  0.1014  11.00000  0.05    1.14
Q5    1   0.6305  0.4201  0.0843  11.00000  0.05    0.95
Q6    1   0.6028  0.4373  0.0663  11.00000  0.05    0.90
Q7    1   0.9237  0.1427  0.5279  11.00000  0.05    0.55
Q8    1   0.8983  0.2640  0.5363  11.00000  0.05    0.47
Q9    1   0.0974  0.3192  0.5183  11.00000  0.05    0.43
Q10   1   0.8322  0.2358  0.5567  11.00000  0.05    0.43
;
_shelx_res_checksum   29105

_shelx_hkl_file
;
  -1   0   0    7.93    0.54
  -1   0   0    7.85    0.59
  -1   0   0    8.20    0.49
  -1   0   0    7.46    0.50
  -1   0   0    7.18    0.52
  -1   0   0    7.77    0.47
  -1   0   0    7.20    0.50
  -1   0   0    7.80    0.47
  -1   0   0    7.39    0.47
   1   0   0    7.62    0.49
   1   0   0    8.38    0.53
   1   0   0    7.39    0.46
   1   0   0    7.01    0.45
   1   0   0    7.92    0.58
   1   0   0    7.86    0.48
   1   0   0    7.49    0.46
   1   0   0    7.75    0.49
   1   0   0    8.13    0.52
  -2   0   0  363.51    7.62
  -2   0   0  366.03    7.56
  -2   0   0  360.93    7.54
  -2   0   0  363.11    7.58
  -2   0   0  355.21    7.63
  -2   0   0  373.23    7.65
  -2   0   0  366.03    7.85
  -2   0   0  357.29    7.64
  -2   0   0  348.01    7.49
   2   0   0  372.56    7.66
   2   0   0  366.81    7.57
   2   0   0  359.17    7.58
   2   0   0  373.44    7.66
  -3   0   0   86.73    2.58
  -3   0   0   86.96    2.64
  -3   0   0   83.33    2.60
  -3   0   0   84.96    2.65
  -3   0   0   85.25    2.88
  -3   0   0   83.20    2.45
  -3   0   0   86.06    2.58
  -3   0   0   86.37    2.49
   3   0   0   85.45    2.66
   3   0   0   86.72    2.50
   3   0   0   81.56    2.89
   3   0   0   86.79    2.58
   3   0   0   87.78    2.66
  -4   0   0   44.39    2.13
  -4   0   0   48.48    2.09
  -4   0   0   47.29    2.12
  -4   0   0   45.78    1.97
  -4   0   0   47.46    2.09
  -4   0   0   44.66    2.26
  -4   0   0   48.19    2.12
  -4   0   0   45.93    2.04
   4   0   0   46.67    2.08
   4   0   0   45.25    2.03
   4   0   0   45.50    2.29
   4   0   0   49.20    2.01
   4   0   0   44.72    2.02
  -5   0   0   16.07    2.00
  -5   0   0   17.33    1.75
  -5   0   0   13.84    1.57
  -5   0   0   15.15    1.50
  -5   0   0   13.64    1.65
  -5   0   0   16.51    1.58
  -5   0   0   17.19    1.56
   5   0   0   15.93    1.56
   5   0   0   15.18    1.59
   5   0   0   16.28    1.94
   5   0   0   15.53    1.64
   5   0   0   14.24    1.51
  -6   0   0   45.08    2.52
  -6   0   0   44.11    2.34
  -6   0   0   43.70    2.82
  -6   0   0   43.87    2.44
  -6   0   0   42.30    2.26
  -6   0   0   45.59    2.53
  -6   0   0   44.12    2.41
   6   0   0   45.25    2.32
   6   0   0   47.25    2.79
   6   0   0   45.88    2.45
   6   0   0   44.16    2.55
   6   0   0   41.39    2.36
  -7   0   0    4.71    1.47
  -7   0   0    5.16    1.53
  -7   0   0    7.19    1.73
  -7   0   0    6.18    1.93
  -7   0   0    5.72    1.58
  -7   0   0    6.35    1.48
   7   0   0    9.08    1.64
   7   0   0    7.62    1.53
   7   0   0    5.61    1.40
   7   0   0    7.05    1.81
   7   0   0    7.41    1.61
  -8   0   0    6.30    2.22
  -8   0   0    5.58    1.78
  -8   0   0    3.79    1.82
  -8   0   0    3.43    1.66
  -8   0   0    4.30    1.58
  -8   0   0    4.04    1.75
   8   0   0    3.83    1.51
   8   0   0    5.93    1.77
   8   0   0    8.11    1.96
   8   0   0    2.43    1.49
   8   0   0    6.78    2.06
  -9   0   0    1.44    1.59
  -9   0   0    0.15    1.82
  -9   0   0   -1.28    1.61
  -9   0   0    1.55    1.67
   9   0   0   -0.30    1.56
   9   0   0   -1.30    1.50
   9   0   0    9.30    2.19
   9   0   0    0.11    1.46
 -10   0   0   12.07    2.62
 -10   0   0   11.74    2.46
 -10   0   0   10.91    2.54
  10   0   0   11.13    2.41
  10   0   0    5.84    2.04
  10   0   0    7.46    2.03
 -11   0   0    1.57    1.98
 -11   0   0    1.90    2.06
  11   0   0    2.01    2.02
  11   0   0    4.21    2.09
  10  -1   0    0.80    1.88
  10  -1   0   -4.14    1.48
  10  -1   0   -1.98    1.81
 -10   1   0    1.12    1.94
 -10   1   0    0.96    1.79
 -10   1   0   -0.04    1.75
   9  -1   0    0.96    1.73
   9  -1   0    0.21    1.84
   9  -1   0    1.22    1.71
  -9   1   0    1.89    1.97
  -9   1   0    2.43    1.81
  -9   1   0    3.92    1.97
   8  -1   0    5.11    1.73
   8  -1   0    2.67    1.72
   8  -1   0    2.67    1.78
  -8   1   0    5.70    1.80
  -8   1   0    8.39    1.98
  -8   1   0    5.38    1.92
  -8   1   0    4.14    1.50
   7  -1   0    1.77    1.21
   7  -1   0    2.70    1.43
   7  -1   0    2.80    1.41
   7  -1   0    4.53    1.55
   7  -1   0    1.92    1.43
  -7   1   0    3.83    1.33
  -7   1   0    0.69    1.34
  -7   1   0    3.29    1.58
  -7   1   0    3.22    1.57
   6  -1   0    2.49    1.18
   6  -1   0    4.26    1.37
   6  -1   0    5.42    1.36
   6  -1   0    4.87    1.40
   6  -1   0    3.40    1.13
   6  -1   0    5.24    1.13
  -6   1   0    7.07    1.58
  -6   1   0    3.98    1.40
  -6   1   0    3.82    1.40
  -6   1   0    4.48    1.17
  -6   1   0    2.44    1.29
   5  -1   0  171.54    4.88
   5  -1   0  169.10    4.57
   5  -1   0  168.78    4.66
   5  -1   0  172.65    4.95
   5  -1   0  167.47    4.59
  -5   1   0  167.39    4.82
  -5   1   0  166.67    4.93
  -5   1   0  166.34    4.90
  -5   1   0  170.39    4.52
  -5   1   0  166.56    4.97
  -5   1   0  167.59    4.96
   4  -1   0   60.80    2.22
   4  -1   0   61.92    2.21
   4  -1   0   62.11    2.49
   4  -1   0   62.50    2.45
   4  -1   0   65.62    2.37
  -4   1   0   64.29    2.65
  -4   1   0   61.85    2.54
  -4   1   0   62.12    2.48
  -4   1   0   60.32    2.21
  -4   1   0   61.10    2.47
  -4   1   0   60.48    2.57
   3  -1   0  136.81    3.56
   3  -1   0  135.07    3.32
   3  -1   0  136.58    3.65
   3  -1   0  132.11    3.31
   3  -1   0  134.39    3.52
  -3   1   0  132.38    3.77
  -3   1   0  132.44    3.52
  -3   1   0  134.88    3.62
  -3   1   0  128.98    3.32
  -3   1   0  130.95    3.70
  -3   1   0  129.80    3.69
   2  -1   0  153.26    3.37
   2  -1   0  154.91    3.38
   2  -1   0  157.30    3.65
   2  -1   0  156.34    3.76
   2  -1   0  151.26    3.50
   2  -1   0  149.79    3.49
  -2   1   0  147.39    3.37
  -2   1   0  149.69    3.47
  -2   1   0  155.85    3.80
  -2   1   0  153.97    3.82
  -2   1   0  154.44    3.86
   1  -1   0  160.59    3.49
   1  -1   0  153.75    3.36
   1  -1   0  156.10    3.48
  -1   1   0  153.46    3.59
  -1   1   0  153.32    3.35
  -1   1   0  153.36    3.61
  -1   1   0  158.25    3.53
   0  -1   0  105.39    2.26
   0  -1   0  104.48    2.31
   0  -1   0  104.97    2.20
   0  -1   0  100.66    2.26
   0  -1   0  103.73    2.25
   0  -1   0  103.69    2.33
   0  -1   0  105.66    2.30
   0  -1   0  103.93    2.18
   0   1   0  105.39    2.30
   0   1   0  104.24    2.30
   0   1   0  102.41    2.25
   0   1   0  100.57    2.19
   0   1   0  102.28    2.33
   0   1   0  107.81    2.37
   0   1   0  106.89    2.19
   0   1   0  102.72    2.24
   0   1   0   99.51    2.26
  -1  -1   0    3.41    0.62
  -1  -1   0    3.50    0.50
  -1  -1   0    3.88    0.31
  -1  -1   0    4.92    0.78
  -1  -1   0    3.52    0.35
  -1  -1   0    4.45    0.53
  -1  -1   0    3.91    0.54
  -1  -1   0    3.31    0.38
   1   1   0    3.19    0.37
   1   1   0    3.64    0.29
   1   1   0    3.63    0.33
   1   1   0    3.51    0.34
   1   1   0    4.30    0.51
   1   1   0    3.43    0.59
   1   1   0    4.37    0.52
  -2  -1   0  126.47    2.98
  -2  -1   0  128.73    3.01
  -2  -1   0  124.36    2.94
  -2  -1   0  128.44    3.63
  -2  -1   0  128.73    3.12
  -2  -1   0  127.72    3.37
  -2  -1   0  131.55    3.23
  -2  -1   0  129.57    3.11
   2   1   0  129.91    3.40
   2   1   0  123.41    3.39
   2   1   0  119.48    3.22
   2   1   0  121.85    3.11
  -3  -1   0  391.44    8.36
  -3  -1   0  381.87    8.21
  -3  -1   0  387.12    8.22
  -3  -1   0  393.95    8.67
  -3  -1   0  388.72    8.25
  -3  -1   0  390.10    9.03
  -3  -1   0  388.94    8.33
  -3  -1   0  380.12    8.40
   3   1   0  384.48    8.67
   3   1   0  387.80    8.67
  -4  -1   0   88.94    2.91
  -4  -1   0   95.64    3.00
  -4  -1   0   98.43    3.27
  -4  -1   0   91.09    2.82
  -4  -1   0   92.35    3.03
  -4  -1   0   87.82    3.58
  -4  -1   0   84.40    2.77
  -4  -1   0   93.03    2.89
   4   1   0   89.60    3.23
   4   1   0   89.34    3.25
  -5  -1   0   42.41    2.21
  -5  -1   0   46.19    2.31
  -5  -1   0   43.65    2.08
  -5  -1   0   42.88    2.14
  -5  -1   0   43.45    2.41
  -5  -1   0   41.86    2.66
  -5  -1   0   42.73    2.13
  -5  -1   0   42.76    2.24
   5   1   0   42.44    2.33
   5   1   0   40.72    2.36
   5   1   0   42.45    2.11
   5   1   0   43.33    2.69
  -6  -1   0    9.63    1.44
  -6  -1   0   12.58    1.68
  -6  -1   0    8.53    1.42
  -6  -1   0    9.11    1.47
  -6  -1   0   11.17    1.62
  -6  -1   0    9.04    1.63
  -6  -1   0   11.07    2.12
  -6  -1   0   10.16    1.41
   6   1   0   11.79    2.15
   6   1   0    9.05    1.37
   6   1   0   10.17    1.71
   6   1   0   11.00    1.61
  -7  -1   0    2.62    1.77
  -7  -1   0    2.89    1.32
  -7  -1   0    2.91    1.36
  -7  -1   0    3.08    1.45
  -7  -1   0    1.69    1.43
  -7  -1   0    2.87    1.34
  -7  -1   0    2.85    1.33
   7   1   0    4.60    1.46
   7   1   0    3.74    1.44
   7   1   0    4.17    1.31
   7   1   0    1.12    1.32
   7   1   0    5.67    1.75
  -8  -1   0    3.43    1.59
  -8  -1   0    3.74    1.57
  -8  -1   0    2.31    1.54
  -8  -1   0   -0.74    1.28
  -8  -1   0    1.66    2.15
  -8  -1   0    4.03    1.65
  -8  -1   0    3.34    1.57
   8   1   0    0.69    1.34
   8   1   0    2.69    1.60
   8   1   0    5.29    1.56
   8   1   0    3.54    1.74
   8   1   0    2.54    1.81
   8   1   0    2.10    1.39
  -9  -1   0   28.43    2.83
  -9  -1   0   30.97    3.71
  -9  -1   0   36.43    2.99
  -9  -1   0   34.49    2.89
  -9  -1   0   32.71    2.87
  -9  -1   0   26.24    2.74
  -9  -1   0   35.69    2.92
   9   1   0   28.95    2.88
   9   1   0   31.23    3.33
   9   1   0   29.35    2.88
   9   1   0   40.78    2.83
   9   1   0   36.44    3.06
   9   1   0   32.23    3.14
 -10  -1   0   10.43    2.26
 -10  -1   0   11.62    2.38
 -10  -1   0    9.80    2.21
 -10  -1   0    4.77    2.05
  10   1   0    7.69    1.97
  10   1   0    8.56    2.12
  10   1   0    9.31    2.23
 -11  -1   0   -0.29    1.80
 -11  -1   0   -0.40    1.99
 -11  -1   0   -4.52    1.74
  11   1   0    8.08    2.52
  11   1   0   -0.61    1.67
  11   1   0    0.05    1.80
  10  -2   0    1.44    1.89
  10  -2   0    1.21    2.00
 -10   2   0    3.97    1.88
 -10   2   0   -2.50    1.69
 -10   2   0    4.82    2.29
   9  -2   0    4.75    2.02
   9  -2   0    3.58    1.91
   9  -2   0   -1.18    1.59
  -9   2   0    0.45    1.88
  -9   2   0    1.48    1.75
  -9   2   0    4.29    2.11
   8  -2   0   38.29    3.23
   8  -2   0   40.12    2.86
   8  -2   0   38.25    3.11
  -8   2   0   37.68    3.05
  -8   2   0   44.17    3.36
  -8   2   0   41.77    3.27
   7  -2   0    0.20    1.45
   7  -2   0    1.06    1.51
   7  -2   0   -0.58    1.55
  -7   2   0    0.12    1.57
  -7   2   0    1.21    1.16
  -7   2   0   -0.02    1.49
  -7   2   0    1.47    1.47
   6  -2   0   22.49    1.75
   6  -2   0   22.87    1.90
   6  -2   0   27.80    2.09
   6  -2   0   23.36    2.43
   6  -2   0   26.49    2.36
   6  -2   0   27.69    1.65
  -6   2   0   25.06    2.20
  -6   2   0   27.84    2.38
  -6   2   0   24.16    1.72
  -6   2   0   24.54    2.52
   5  -2   0   40.92    1.84
   5  -2   0   42.80    1.77
   5  -2   0   36.39    2.26
   5  -2   0   37.98    2.44
   5  -2   0   43.23    2.02
   5  -2   0   40.65    2.38
  -5   2   0   42.06    1.94
  -5   2   0   42.73    2.36
  -5   2   0   39.67    2.38
  -5   2   0   40.70    2.44
   4  -2   0    8.03    1.08
   4  -2   0    8.67    0.89
   4  -2   0    8.62    0.95
   4  -2   0    7.82    1.38
   4  -2   0    8.45    1.37
   4  -2   0    8.98    1.32
  -4   2   0   10.62    1.55
  -4   2   0    9.57    1.41
  -4   2   0    9.48    1.09
  -4   2   0    8.93    1.50
   3  -2   0   66.23    1.78
   3  -2   0   64.08    1.89
   3  -2   0   64.70    1.90
   3  -2   0   67.30    1.80
   3  -2   0   66.78    2.35
   3  -2   0   67.64    2.52
   3  -2   0   65.20    2.56
  -3   2   0   67.48    2.56
  -3   2   0   64.79    2.63
  -3   2   0   65.78    2.10
  -3   2   0   64.67    2.44
   2  -2   0   60.34    1.48
   2  -2   0   60.63    1.43
   2  -2   0   63.14    1.49
   2  -2   0   64.21    2.23
   2  -2   0   64.32    2.18
   2  -2   0   62.17    2.23
  -2   2   0   63.53    2.31
  -2   2   0   62.27    2.21
  -2   2   0   61.23    1.90
  -2   2   0   61.91    2.19
  -2   2   0   62.14    1.42
   1  -2   0   22.72    0.85
   1  -2   0   24.86    1.33
   1  -2   0   23.97    0.80
   1  -2   0   26.82    1.40
   1  -2   0   24.79    1.24
  -1   2   0   24.29    1.46
  -1   2   0   24.30    1.34
  -1   2   0   24.56    1.20
  -1   2   0   24.41    0.89
  -1   2   0   24.42    1.22
  -1   2   0   24.71    0.84
   0  -2   0  229.03    4.92
   0  -2   0  224.08    4.98
   0  -2   0  224.94    4.92
   0  -2   0  222.71    5.04
   0  -2   0  224.91    4.77
   0   2   0  233.07    5.18
   0   2   0  225.18    4.89
   0   2   0  221.42    4.88
   0   2   0  228.88    4.99
   0   2   0  233.54    4.75
  -1  -2   0  955.18   18.75
  -1  -2   0  972.40   18.93
  -1  -2   0  912.19   18.56
  -1  -2   0  991.93   18.77
  -1  -2   0  958.26   19.10
  -1  -2   0  935.30   19.34
   1   2   0  948.23   18.96
   1   2   0  943.09   18.56
   1   2   0  945.20   19.02
   1   2   0  949.15   19.10
   1   2   0 1000.00   18.57
  -2  -2   0  251.79    5.84
  -2  -2   0  259.27    5.71
  -2  -2   0  247.14    6.32
  -2  -2   0  251.41    5.47
  -2  -2   0  254.31    5.19
  -2  -2   0  253.08    6.03
   2   2   0  255.92    6.08
   2   2   0  252.88    5.69
   2   2   0  255.85    5.28
   2   2   0  257.25    5.88
   2   2   0  249.77    5.21
  -3  -2   0   64.80    2.43
  -3  -2   0   67.12    1.95
  -3  -2   0   67.35    2.28
  -3  -2   0   64.67    1.98
  -3  -2   0   63.44    2.80
  -3  -2   0   73.16    2.73
  -3  -2   0   66.85    2.29
  -3  -2   0   66.35    2.10
   3   2   0   67.90    2.70
   3   2   0   66.09    2.70
   3   2   0   66.61    2.47
   3   2   0   65.76    2.00
   3   2   0   63.92    2.28
  -4  -2   0   35.85    1.87
  -4  -2   0   34.58    2.49
  -4  -2   0   34.90    1.81
  -4  -2   0   37.99    1.97
  -4  -2   0   37.31    1.82
  -4  -2   0   39.09    2.31
  -4  -2   0   33.78    1.56
  -4  -2   0   38.42    1.70
   4   2   0   35.71    2.28
   4   2   0   31.31    1.62
   4   2   0   36.84    2.00
   4   2   0   36.50    2.19
   4   2   0   33.77    1.81
  -5  -2   0    2.08    1.04
  -5  -2   0    2.76    1.20
  -5  -2   0    3.51    0.96
  -5  -2   0    1.59    1.23
  -5  -2   0    2.91    0.95
  -5  -2   0    3.14    0.91
  -5  -2   0    3.12    1.10
  -5  -2   0    3.35    1.61
   5   2   0    2.20    0.92
   5   2   0    2.60    1.18
   5   2   0    2.74    1.26
   5   2   0    1.86    1.11
   5   2   0    1.41    1.11
  -6  -2   0   28.74    1.87
  -6  -2   0   30.67    2.03
  -6  -2   0   28.02    2.09
  -6  -2   0   30.95    2.07
  -6  -2   0   27.77    2.67
  -6  -2   0   27.65    2.10
  -6  -2   0   31.04    2.08
  -6  -2   0   25.23    2.33
   6   2   0   27.85    2.05
   6   2   0   26.54    2.57
   6   2   0   28.64    2.13
   6   2   0   27.59    2.36
  -7  -2   0   20.02    2.19
  -7  -2   0   19.02    2.12
  -7  -2   0   25.86    3.35
  -7  -2   0   19.92    2.52
  -7  -2   0   20.22    1.98
  -7  -2   0   17.72    1.89
  -7  -2   0   17.19    2.13
  -7  -2   0   20.60    2.13
   7   2   0   19.16    2.14
   7   2   0   18.86    2.49
   7   2   0   19.82    2.96
   7   2   0   21.67    2.02
   7   2   0   20.72    2.10
  -8  -2   0    1.43    1.49
  -8  -2   0    1.45    1.31
  -8  -2   0    1.72    1.60
  -8  -2   0    1.37    1.60
  -8  -2   0   -0.26    1.99
  -8  -2   0   -0.06    1.24
  -8  -2   0    0.11    1.31
   8   2   0    0.75    1.50
   8   2   0   -1.80    1.32
   8   2   0    1.21    1.72
   8   2   0    1.39    1.38
   8   2   0    0.00    1.18
   8   2   0   -1.03    1.23
   8   2   0    0.54    1.23
   8   2   0   -1.13    1.44
  -9  -2   0   14.14    2.32
  -9  -2   0   18.91    2.36
  -9  -2   0   16.26    2.61
  -9  -2   0   15.42    2.25
  -9  -2   0   18.23    2.36
  -9  -2   0   12.87    2.40
  -9  -2   0   16.85    3.56
   9   2   0   15.44    2.32
   9   2   0   17.32    2.31
   9   2   0   16.74    2.40
   9   2   0   15.25    2.33
   9   2   0   15.64    2.71
   9   2   0   14.40    2.14
   9   2   0   16.98    2.47
   9   2   0   18.02    3.21
 -10  -2   0   -1.87    1.67
 -10  -2   0   -0.15    1.91
 -10  -2   0   -0.01    1.67
 -10  -2   0   -0.35    2.37
 -10  -2   0   -0.08    1.56
 -10  -2   0   -0.10    1.92
 -10  -2   0    4.77    1.98
  10   2   0    0.14    1.66
  10   2   0    5.36    1.86
  10   2   0   -0.04    1.67
  10   2   0    4.10    1.67
  10   2   0    0.79    1.87
  10   2   0    4.15    1.58
  10   2   0    7.93    2.16
  10   2   0   -0.03    1.67
 -11  -2   0    2.14    1.84
 -11  -2   0    1.67    1.93
 -11  -2   0    0.33    1.75
  11   2   0    1.19    1.88
  11   2   0    1.57    1.75
  11   2   0    3.93    1.60
  11   2   0    0.01    1.67
  10  -3   0    4.48    2.26
  10  -3   0   -0.65    1.96
 -10   3   0    1.78    2.24
 -10   3   0    1.61    2.17
 -10   3   0    2.74    2.04
   9  -3   0   12.77    2.49
   9  -3   0    9.68    2.39
   9  -3   0    4.00    2.47
  -9   3   0    7.06    2.35
  -9   3   0    7.54    2.35
  -9   3   0   12.05    2.48
   8  -3   0    6.13    2.20
   8  -3   0    7.64    2.16
   8  -3   0    8.10    2.04
  -8   3   0    8.50    2.24
  -8   3   0    8.60    2.32
  -8   3   0    9.51    2.20
   7  -3   0    0.05    1.59
   7  -3   0   -1.23    1.65
   7  -3   0    2.20    1.66
  -7   3   0    0.28    1.52
  -7   3   0   -1.36    1.57
  -7   3   0    0.83    1.72
   6  -3   0    2.91    1.44
   6  -3   0    1.31    1.46
   6  -3   0    2.44    1.44
  -6   3   0    1.43    1.00
  -6   3   0    2.28    1.54
  -6   3   0    0.05    1.44
  -6   3   0    4.53    1.44
   5  -3   0   14.25    1.14
   5  -3   0   14.61    1.27
   5  -3   0   16.44    1.92
   5  -3   0   22.33    1.03
   5  -3   0   19.41    2.13
   5  -3   0   21.58    1.90
  -5   3   0   18.89    2.24
  -5   3   0   20.14    1.48
  -5   3   0   19.95    2.23
  -5   3   0   18.20    2.04
   4  -3   0    0.04    0.42
   4  -3   0    0.45    0.50
   4  -3   0    0.04    1.08
   4  -3   0    1.08    1.07
   4  -3   0    2.32    0.38
   4  -3   0    0.55    1.06
  -4   3   0    1.42    1.17
  -4   3   0    1.05    0.98
  -4   3   0    1.88    0.81
  -4   3   0    0.73    1.05
   3  -3   0   38.58    2.09
   3  -3   0   33.29    2.04
   3  -3   0   32.16    2.00
  -3   3   0   29.96    2.06
  -3   3   0   33.05    1.90
  -3   3   0   31.68    1.61
  -3   3   0   35.05    2.02
   2  -3   0   16.88    1.45
   2  -3   0   20.63    1.48
   2  -3   0   19.27    1.35
   2  -3   0   17.94    0.61
   2  -3   0   18.49    0.57
  -2   3   0   17.85    0.62
  -2   3   0   17.97    0.56
  -2   3   0   17.70    1.58
  -2   3   0   18.09    1.29
  -2   3   0   20.13    1.48
  -2   3   0   17.33    1.42
   1  -3   0    5.71    0.89
   1  -3   0    6.91    1.05
   1  -3   0    6.80    0.67
   1  -3   0    7.51    1.05
   1  -3   0    7.31    0.81
  -1   3   0    8.48    1.31
  -1   3   0    5.52    1.03
  -1   3   0    6.98    0.78
  -1   3   0    6.06    0.63
  -1   3   0    7.14    0.94
  -1   3   0    8.31    1.08
   0  -3   0   12.35    1.16
   0  -3   0   12.24    1.06
   0  -3   0   10.78    1.05
   0  -3   0    9.47    1.14
   0  -3   0   11.48    0.90
   0   3   0   11.52    0.90
   0   3   0   10.42    0.98
   0   3   0   11.30    1.06
   0   3   0   12.55    1.21
   0   3   0   13.07    1.29
  -1  -3   0  804.01   15.54
  -1  -3   0  770.19   15.66
  -1  -3   0  753.57   14.83
  -1  -3   0  738.68   14.81
  -1  -3   0  756.28   15.97
  -1  -3   0  773.77   15.30
   1   3   0  760.48   15.08
   1   3   0  730.58   15.58
   1   3   0  754.89   15.59
   1   3   0  773.56   15.61
   1   3   0  749.15   14.84
  -2  -3   0  160.35    4.16
  -2  -3   0  161.69    3.89
  -2  -3   0  164.72    4.82
  -2  -3   0  159.87    4.41
  -2  -3   0  160.99    3.37
   2   3   0  166.08    4.24
   2   3   0  157.74    3.37
   2   3   0  159.08    4.40
   2   3   0  163.05    4.46
   2   3   0  160.68    4.34
   2   3   0  162.58    3.62
  -3  -3   0   62.36    3.08
  -3  -3   0   64.75    2.79
  -3  -3   0   60.67    2.36
  -3  -3   0   61.53    1.73
  -3  -3   0   65.25    2.12
  -3  -3   0   61.31    2.57
   3   3   0   65.70    2.86
   3   3   0   65.06    2.40
   3   3   0   62.59    1.86
   3   3   0   59.89    2.59
  -4  -3   0   72.97    2.87
  -4  -3   0   78.62    2.30
  -4  -3   0   80.27    3.37
  -4  -3   0   81.27    2.89
  -4  -3   0   77.52    3.70
  -4  -3   0   81.33    2.61
   4   3   0   80.19    3.35
   4   3   0   74.35    2.91
   4   3   0   78.81    2.40
   4   3   0   77.50    3.39
   4   3   0   76.68    2.83
  -5  -3   0    0.04    0.90
  -5  -3   0   -0.16    1.01
  -5  -3   0    0.09    0.74
  -5  -3   0   -0.05    1.23
  -5  -3   0    0.48    0.81
  -5  -3   0    0.09    1.14
  -5  -3   0    0.17    1.56
  -5  -3   0   -0.46    0.96
   5   3   0   -0.30    1.31
   5   3   0   -1.32    0.71
   5   3   0    0.97    1.18
   5   3   0   -0.78    0.96
  -6  -3   0    9.66    1.32
  -6  -3   0    9.74    1.60
  -6  -3   0   10.11    1.93
  -6  -3   0    8.22    2.23
  -6  -3   0   10.75    1.72
  -6  -3   0    8.86    1.67
  -6  -3   0    8.42    1.24
  -6  -3   0    9.73    1.33
   6   3   0    9.32    1.28
   6   3   0   11.09    1.84
   6   3   0    9.81    1.59
   6   3   0   11.60    2.01
  -7  -3   0    3.04    1.55
  -7  -3   0    1.13    1.12
  -7  -3   0    1.19    1.26
  -7  -3   0    1.18    1.13
  -7  -3   0    4.18    1.50
  -7  -3   0    3.03    1.64
  -7  -3   0    0.94    1.95
  -7  -3   0    2.47    1.14
   7   3   0    2.82    1.62
   7   3   0    0.98    1.71
   7   3   0    1.51    1.09
   7   3   0    2.05    1.32
   7   3   0    3.28    1.50
  -8  -3   0    1.66    1.62
  -8  -3   0    2.50    1.68
  -8  -3   0    0.41    1.64
  -8  -3   0    0.71    1.69
  -8  -3   0    3.95    1.59
  -8  -3   0    1.80    1.27
  -8  -3   0   -0.20    1.13
  -8  -3   0   -1.36    2.11
   8   3   0    2.39    2.00
   8   3   0    2.24    1.34
   8   3   0    0.30    1.54
   8   3   0    1.78    1.57
   8   3   0    0.52    1.72
   8   3   0    3.40    1.31
  -9  -3   0    1.10    2.48
  -9  -3   0    2.51    1.56
  -9  -3   0    0.99    1.75
  -9  -3   0    2.52    1.61
  -9  -3   0    0.93    1.66
  -9  -3   0    1.76    1.75
  -9  -3   0    1.82    1.40
   9   3   0    1.40    1.44
   9   3   0    3.46    1.57
   9   3   0    2.98    1.68
   9   3   0    3.08    1.58
   9   3   0    5.72    2.09
   9   3   0    2.91    2.12
   9   3   0    4.00    1.58
   9   3   0    3.76    1.77
 -10  -3   0    6.60    2.10
 -10  -3   0    6.64    1.90
 -10  -3   0    6.07    1.83
 -10  -3   0    6.21    2.21
 -10  -3   0    8.74    2.06
 -10  -3   0    4.84    1.95
 -10  -3   0    5.20    3.13
  10   3   0    7.74    1.97
  10   3   0    6.45    2.31
  10   3   0    8.95    1.90
  10   3   0    6.00    1.85
  10   3   0    5.35    1.77
  10   3   0    8.69    2.03
  10   3   0    9.22    2.51
  10   3   0    8.75    2.01
 -11  -3   0    0.42    2.03
 -11  -3   0   -2.17    2.76
 -11  -3   0    1.14    2.01
 -11  -3   0    0.69    1.81
 -11  -3   0   -0.39    1.54
  11   3   0    7.11    2.04
  11   3   0    1.60    1.45
  11   3   0   -2.74    2.82
  11   3   0    3.47    1.83
  11   3   0   10.55    2.41
  11   3   0    3.44    1.86
  11   3   0    1.01    1.55
   9  -4   0    0.37    1.96
   9  -4   0    3.21    1.98
  -9   4   0   -2.07    1.72
  -9   4   0   -0.65    2.01
  -9   4   0   -0.49    1.95
   8  -4   0   -0.49    1.63
   8  -4   0   -0.63    1.67
   8  -4   0   -3.22    1.60
  -8   4   0    2.81    1.90
  -8   4   0   -0.35    1.70
  -8   4   0   -1.10    1.79
   7  -4   0    5.73    1.91
   7  -4   0    4.83    1.96
   7  -4   0    6.14    1.94
  -7   4   0    8.55    2.16
  -7   4   0    6.95    2.18
  -7   4   0    8.33    2.15
   6  -4   0   20.31    2.55
   6  -4   0   12.07    2.08
   6  -4   0   17.51    2.28
  -6   4   0   13.00    2.20
  -6   4   0   17.39    2.56
  -6   4   0   13.67    2.35
   5  -4   0   20.82    2.38
   5  -4   0   15.51    2.04
   5  -4   0   21.53    2.16
  -5   4   0   15.94    2.29
  -5   4   0   19.32    2.36
  -5   4   0   17.62    2.15
  -5   4   0   20.39    1.57
   4  -4   0    5.59    1.44
   4  -4   0    5.55    1.52
   4  -4   0    4.48    1.41
  -4   4   0    7.73    1.65
  -4   4   0    3.78    1.50
  -4   4   0    6.38    1.45
  -4   4   0    8.26    1.20
   3  -4   0   35.88    2.05
   3  -4   0   33.50    2.11
   3  -4   0   31.21    2.10
  -3   4   0   31.93    1.79
  -3   4   0   31.75    2.06
  -3   4   0   29.84    2.20
  -3   4   0   31.62    2.17
   2  -4   0   11.71    1.49
   2  -4   0   12.00    1.41
   2  -4   0   11.68    0.67
   2  -4   0   11.97    0.75
   2  -4   0   12.60    1.49
  -2   4   0   13.46    1.85
  -2   4   0   11.84    0.78
  -2   4   0   14.99    1.48
  -2   4   0   10.01    0.87
  -2   4   0   11.87    1.58
  -2   4   0   11.67    0.65
  -2   4   0   14.59    1.48
   1  -4   0   10.42    1.13
   1  -4   0    9.28    1.11
   1  -4   0   10.03    1.33
   1  -4   0    9.92    0.97
   1  -4   0    9.72    1.29
  -1   4   0    8.65    1.10
  -1   4   0   10.32    1.31
  -1   4   0    9.65    1.44
  -1   4   0    8.68    0.90
  -1   4   0   10.45    1.36
   0  -4   0   15.20    1.44
   0  -4   0   12.96    1.28
   0  -4   0   13.55    1.40
   0  -4   0   13.01    1.26
   0  -4   0   12.60    0.98
   0   4   0   12.79    1.16
   0   4   0   16.70    1.56
   0   4   0   13.59    1.18
   0   4   0   18.61    1.85
  -1  -4   0  104.93    3.46
  -1  -4   0  113.07    3.83
  -1  -4   0  110.49    2.66
  -1  -4   0  106.79    3.31
  -1  -4   0  111.86    3.18
   1   4   0  114.32    2.97
   1   4   0  111.61    3.50
   1   4   0  113.41    3.56
   1   4   0  117.32    3.58
   1   4   0  108.75    3.37
  -2  -4   0    7.49    1.69
  -2  -4   0    7.39    1.26
  -2  -4   0    8.19    1.39
  -2  -4   0    7.25    1.02
  -2  -4   0    6.60    0.58
   2   4   0    6.64    1.41
   2   4   0    7.30    0.86
   2   4   0    7.04    1.38
   2   4   0    9.63    1.49
   2   4   0    7.04    0.56
  -3  -4   0   76.82    3.16
  -3  -4   0   80.50    2.94
  -3  -4   0   79.52    1.98
  -3  -4   0   83.55    2.66
  -3  -4   0   81.06    3.56
   3   4   0   91.86    3.55
   3   4   0   82.18    2.31
   3   4   0   84.11    3.04
   3   4   0   83.57    3.08
   3   4   0   78.65    3.26
  -4  -4   0   34.18    2.32
  -4  -4   0   39.94    2.61
  -4  -4   0   35.39    1.37
  -4  -4   0   36.91    2.87
  -4  -4   0   38.09    1.91
  -4  -4   0   32.83    2.06
   4   4   0   34.78    2.35
   4   4   0   32.70    2.33
   4   4   0   36.80    2.17
   4   4   0   34.04    1.52
  -5  -4   0   56.72    2.92
  -5  -4   0   55.20    1.95
  -5  -4   0   54.02    2.63
  -5  -4   0   51.90    3.49
  -5  -4   0   53.52    2.42
  -5  -4   0   53.45    3.16
   5   4   0   52.83    2.02
   5   4   0   55.08    2.92
   5   4   0   55.08    3.24
   5   4   0   58.24    2.67
  -6  -4   0    0.39    0.92
  -6  -4   0   -0.14    0.81
  -6  -4   0   -0.58    1.77
  -6  -4   0    0.67    1.47
  -6  -4   0    1.31    1.44
  -6  -4   0   -0.81    1.14
   6   4   0    1.15    1.50
   6   4   0    0.52    1.34
   6   4   0   -0.73    1.27
   6   4   0   -0.22    0.83
  -7  -4   0    3.27    1.07
  -7  -4   0    4.48    2.35
  -7  -4   0    4.98    1.88
  -7  -4   0    4.47    1.60
  -7  -4   0    5.29    1.43
  -7  -4   0    3.33    1.69
  -7  -4   0    1.91    1.08
   7   4   0    2.79    1.80
   7   4   0    2.42    1.10
   7   4   0    5.09    1.73
   7   4   0    5.17    2.23
   7   4   0    4.16    1.70
  -8  -4   0    1.38    1.17
  -8  -4   0    1.22    1.77
  -8  -4   0   -1.20    1.15
  -8  -4   0   -0.27    1.51
  -8  -4   0    2.19    1.28
  -8  -4   0   -0.04    2.22
  -8  -4   0    2.40    1.77
   8   4   0    1.42    1.81
   8   4   0    1.97    1.30
   8   4   0    0.23    1.43
   8   4   0    1.80    2.10
   8   4   0    0.51    1.64
  -9  -4   0   24.14    2.44
  -9  -4   0   23.97    2.78
  -9  -4   0   21.69    3.98
  -9  -4   0   22.63    3.06
  -9  -4   0   26.54    2.32
  -9  -4   0   22.73    2.42
   9   4   0   28.24    2.42
   9   4   0   22.80    2.37
   9   4   0   19.94    3.08
   9   4   0   23.10    2.93
   9   4   0   23.21    3.64
   9   4   0   30.70    2.89
 -10  -4   0    4.82    1.96
 -10  -4   0    2.71    3.02
 -10  -4   0    3.05    1.55
 -10  -4   0    1.53    1.85
 -10  -4   0    2.87    2.21
  10   4   0    2.18    2.13
  10   4   0    2.97    1.94
  10   4   0    4.08    1.63
  10   4   0    7.63    2.54
  10   4   0    4.04    1.78
  10   4   0    6.52    2.07
  10   4   0    4.13    1.76
  10   4   0    3.65    2.65
 -11  -4   0   -1.04    1.85
 -11  -4   0    2.76    2.33
 -11  -4   0    5.42    2.24
 -11  -4   0   -2.25    3.45
  11   4   0    3.55    1.88
  11   4   0    5.95    2.07
  11   4   0    0.16    1.46
   8  -5   0    5.78    2.20
   8  -5   0   -1.26    1.29
  -8   5   0    2.38    2.10
  -8   5   0    0.59    1.85
  -8   5   0   -0.12    1.99
   7  -5   0   -2.95    1.45
   7  -5   0    1.32    1.74
   7  -5   0   -1.62    1.84
  -7   5   0    0.36    1.76
  -7   5   0   -0.17    1.76
  -7   5   0    1.90    1.91
   6  -5   0   -2.02    1.43
   6  -5   0   -0.84    1.52
   6  -5   0    1.72    1.75
  -6   5   0    1.37    1.83
  -6   5   0    4.00    1.84
  -6   5   0   -0.09    1.63
   5  -5   0    0.56    1.65
   5  -5   0   -0.30    1.08
   5  -5   0    1.82    1.54
  -5   5   0    1.56    1.16
  -5   5   0    3.21    1.71
  -5   5   0    0.73    1.47
  -5   5   0    0.51    1.70
   4  -5   0    2.13    1.36
   4  -5   0   -0.85    1.27
   4  -5   0    5.91    1.54
  -4   5   0    1.44    1.18
  -4   5   0    1.57    1.28
  -4   5   0    0.70    1.20
  -4   5   0    4.58    1.15
   3  -5   0    2.39    1.27
   3  -5   0    3.49    1.25
   3  -5   0    1.88    1.28
  -3   5   0    2.41    1.36
  -3   5   0    3.19    1.62
  -3   5   0    3.74    1.18
  -3   5   0    2.77    1.20
   2  -5   0  194.23    4.49
   2  -5   0  198.81    5.47
   2  -5   0  195.67    4.31
   2  -5   0  192.48    5.33
   2  -5   0  200.60    5.39
  -2   5   0  192.54    4.31
  -2   5   0  183.44    4.32
  -2   5   0  196.14    5.29
  -2   5   0  197.28    5.21
  -2   5   0  195.03    5.48
  -2   5   0  191.86    5.83
   1  -5   0   82.79    2.87
   1  -5   0   83.65    2.84
   1  -5   0   86.51    3.10
   1  -5   0   87.15    2.63
   1  -5   0   88.93    3.05
  -1   5   0   88.76    3.12
  -1   5   0   79.45    3.24
  -1   5   0   82.19    2.60
  -1   5   0   83.26    2.81
  -1   5   0   88.46    3.08
  -1   5   0   80.12    2.52
   0  -5   0   13.34    1.18
   0  -5   0   12.94    1.42
   0  -5   0   14.01    1.69
   0  -5   0   14.45    1.48
   0  -5   0   15.27    1.63
   0   5   0   11.98    1.35
   0   5   0   12.68    1.39
   0   5   0   13.36    1.28
   0   5   0   16.17    2.02
   0   5   0   14.13    1.65
  -1  -5   0   39.28    1.49
  -1  -5   0   39.36    1.99
  -1  -5   0   39.84    2.41
  -1  -5   0   41.44    2.18
  -1  -5   0   39.63    2.13
   1   5   0   39.42    2.18
   1   5   0   39.93    2.46
   1   5   0   39.34    1.79
   1   5   0   40.49    2.30
  -2  -5   0  124.32    4.26
  -2  -5   0  125.97    4.68
  -2  -5   0  131.91    4.04
  -2  -5   0  128.87    3.00
  -2  -5   0  137.21    3.91
   2   5   0  131.13    4.28
   2   5   0  130.77    3.38
   2   5   0  129.37    4.21
   2   5   0  127.66    4.22
   2   5   0  137.76    4.44
  -3  -5   0   55.97    2.32
  -3  -5   0   62.01    3.46
  -3  -5   0   56.94    1.49
  -3  -5   0   59.84    3.05
  -3  -5   0   55.72    2.63
   3   5   0   61.33    1.57
   3   5   0   60.68    2.83
   3   5   0   62.45    3.18
   3   5   0   58.44    1.97
   3   5   0   61.42    2.96
  -4  -5   0  371.14    8.44
  -4  -5   0  355.47    7.44
  -4  -5   0  344.67    9.32
  -4  -5   0  374.93    8.92
  -4  -5   0  359.39   10.06
   4   5   0  350.60    9.07
   4   5   0  376.16    8.95
   4   5   0  364.84    7.84
   4   5   0  379.24    9.59
  -5  -5   0    2.42    1.25
  -5  -5   0    3.48    0.69
  -5  -5   0    3.65    1.64
  -5  -5   0    4.30    2.10
  -5  -5   0    3.35    1.01
   5   5   0    4.08    0.93
   5   5   0    5.43    1.54
   5   5   0    3.06    1.69
   5   5   0    2.42    1.25
  -6  -5   0    1.96    1.39
  -6  -5   0    1.64    2.11
  -6  -5   0    4.20    1.84
  -6  -5   0    2.44    1.07
  -6  -5   0    4.98    1.82
  -6  -5   0    3.00    0.86
   6   5   0    3.22    1.79
   6   5   0    4.34    1.71
   6   5   0    2.25    1.43
   6   5   0    2.50    0.98
  -7  -5   0   35.36    3.79
  -7  -5   0   37.50    2.75
  -7  -5   0   36.27    3.04
  -7  -5   0   35.20    1.99
  -7  -5   0   38.28    2.58
  -7  -5   0   36.12    3.34
   7   5   0   29.20    1.95
   7   5   0   35.83    3.67
   7   5   0   30.19    2.84
   7   5   0   31.93    3.27
   7   5   0   34.36    2.81
  -8  -5   0   -2.10    1.72
  -8  -5   0    0.47    1.59
  -8  -5   0   -0.87    1.02
  -8  -5   0   -1.50    2.30
  -8  -5   0    1.23    1.44
  -8  -5   0   -0.03    1.93
   8   5   0    1.16    1.17
   8   5   0    0.63    1.16
   8   5   0    2.11    1.65
   8   5   0    2.63    2.28
   8   5   0    0.26    1.76
   8   5   0   -1.14    1.79
  -9  -5   0    4.18    1.60
  -9  -5   0    0.40    2.07
  -9  -5   0    2.68    1.84
  -9  -5   0    3.40    2.25
  -9  -5   0    3.45    2.97
   9   5   0    0.70    2.09
   9   5   0    5.81    2.65
   9   5   0    0.32    1.82
   9   5   0    4.89    1.91
 -10  -5   0    2.05    3.23
 -10  -5   0    2.69    2.18
 -10  -5   0    2.05    1.61
  10   5   0    7.12    2.64
  10   5   0    4.49    2.17
  10   5   0    5.59    2.11
 -11  -5   0   -0.02    3.35
 -11  -5   0   -0.11    2.00
 -11  -5   0    1.21    2.02
  11   5   0    4.68    1.79
  11   5   0    6.32    2.47
  11   5   0    4.71    1.79
  11   5   0    6.06    2.30
   8  -6   0    0.08    1.94
   8  -6   0    3.53    2.25
  -8   6   0   -0.36    2.13
  -8   6   0    3.32    2.14
  -8   6   0    0.31    1.88
   7  -6   0    0.23    1.89
   7  -6   0   -0.81    1.68
   7  -6   0   -0.21    1.90
  -7   6   0    1.86    1.94
  -7   6   0    2.87    2.15
  -7   6   0    1.48    2.03
   6  -6   0    5.98    2.01
   6  -6   0    5.25    2.08
   6  -6   0    8.09    2.13
  -6   6   0    7.08    2.37
  -6   6   0    7.58    2.14
  -6   6   0    6.29    2.09
   5  -6   0    3.54    1.71
   5  -6   0    3.28    1.75
   5  -6   0    1.29    1.30
  -5   6   0    3.44    1.65
  -5   6   0    3.68    1.53
  -5   6   0    1.62    1.69
   4  -6   0    4.23    1.57
   4  -6   0    4.22    1.59
   4  -6   0    3.35    1.58
  -4   6   0    1.30    1.45
  -4   6   0    4.13    1.92
  -4   6   0    6.02    1.83
  -4   6   0    3.78    1.31
   3  -6   0    4.55    1.49
   3  -6   0    6.02    1.55
   3  -6   0    3.91    1.41
  -3   6   0    6.48    1.55
  -3   6   0    3.85    1.89
  -3   6   0    5.77    1.45
  -3   6   0    6.29    1.66
   2  -6   0   15.32    1.94
   2  -6   0   12.42    1.65
   2  -6   0   12.73    1.12
   2  -6   0   15.34    1.90
  -2   6   0   12.19    1.10
  -2   6   0   11.58    1.81
  -2   6   0   13.02    1.04
  -2   6   0   12.93    1.76
  -2   6   0   14.61    2.26
  -2   6   0   13.30    1.64
   1  -6   0   18.55    1.46
   1  -6   0   18.42    1.64
   1  -6   0   16.68    1.81
   1  -6   0   19.84    1.73
   1  -6   0   17.97    1.90
  -1   6   0   20.43    1.97
  -1   6   0   19.61    2.14
  -1   6   0   18.16    1.27
  -1   6   0   22.80    2.49
  -1   6   0   17.88    1.41
   0  -6   0    2.77    1.01
   0  -6   0    2.60    1.18
   0  -6   0    2.61    0.88
   0  -6   0    2.75    1.15
   0  -6   0    1.01    1.13
   0   6   0    1.78    1.30
   0   6   0    3.94    0.80
   0   6   0    0.58    0.94
   0   6   0    1.63    1.24
   0   6   0    1.44    0.98
  -1  -6   0   10.79    1.00
  -1  -6   0    9.52    1.48
  -1  -6   0   10.12    1.78
  -1  -6   0   12.17    1.47
  -1  -6   0    8.74    1.51
   1   6   0   10.26    1.51
   1   6   0   11.07    1.75
   1   6   0   10.69    1.41
   1   6   0   10.03    1.89
   1   6   0   10.43    1.22
  -2  -6   0   71.24    3.21
  -2  -6   0   64.81    3.48
  -2  -6   0   73.82    2.97
  -2  -6   0   67.92    2.00
  -2  -6   0   66.06    2.75
   2   6   0   65.82    2.98
   2   6   0   70.95    3.26
   2   6   0   74.23    3.30
   2   6   0   67.48    2.34
  -3  -6   0   15.40    0.70
  -3  -6   0   18.81    2.64
  -3  -6   0   16.96    2.15
  -3  -6   0   16.89    1.93
  -3  -6   0   14.31    0.85
  -3  -6   0   15.64    1.56
   3   6   0   14.69    1.23
   3   6   0   17.69    2.26
   3   6   0   15.48    2.12
   3   6   0   21.29    2.21
  -4  -6   0    0.82    1.19
  -4  -6   0    0.81    1.71
  -4  -6   0    0.81    0.32
  -4  -6   0    0.39    1.44
  -4  -6   0    0.17    0.92
   4   6   0    1.09    1.48
   4   6   0    1.44    1.51
   4   6   0    1.97    0.62
   4   6   0    2.18    1.47
   4   6   0    0.35    0.81
  -5  -6   0    8.74    2.44
  -5  -6   0    9.40    1.42
  -5  -6   0    8.47    0.73
  -5  -6   0    7.84    1.71
  -5  -6   0   11.98    2.19
   5   6   0    7.85    1.97
   5   6   0    9.85    1.99
   5   6   0    8.76    1.17
   5   6   0    8.91    1.96
  -6  -6   0    8.36    2.23
  -6  -6   0    9.35    1.85
  -6  -6   0    8.26    1.43
  -6  -6   0   10.62    2.77
   6   6   0    9.04    2.15
   6   6   0   10.19    2.44
   6   6   0   11.66    2.12
   6   6   0   10.10    1.30
  -7  -6   0    4.79    1.84
  -7  -6   0    4.87    2.33
  -7  -6   0    4.78    1.45
  -7  -6   0    5.91    1.87
   7   6   0    4.28    1.72
   7   6   0    2.76    2.00
   7   6   0    4.29    2.43
   7   6   0    7.72    2.04
   7   6   0    7.59    2.27
  -8  -6   0   14.82    2.16
  -8  -6   0   13.73    2.39
  -8  -6   0   17.57    2.99
  -8  -6   0   17.64    3.82
   8   6   0   15.25    2.95
   8   6   0   13.52    2.72
   8   6   0   16.81    3.65
   8   6   0   14.97    2.50
  -9  -6   0    1.21    2.92
  -9  -6   0   -0.63    2.08
  -9  -6   0   -0.97    1.51
  -9  -6   0    1.59    1.80
   9   6   0    1.45    1.96
   9   6   0    0.38    1.73
   9   6   0    4.06    2.68
   9   6   0    0.80    2.16
 -10  -6   0    0.84    1.96
 -10  -6   0    0.14    1.75
 -10  -6   0   -1.12    3.02
  10   6   0    7.21    2.77
  10   6   0    2.54    1.98
  10   6   0    3.22    2.29
 -11  -6   0   -2.42    3.26
 -11  -6   0    1.45    2.12
  11   6   0    6.54    2.61
  11   6   0    0.60    2.42
   7  -7   0   -0.37    1.81
   7  -7   0    1.69    2.00
  -7   7   0   -1.03    1.82
  -7   7   0    2.98    2.36
  -7   7   0   -0.22    2.07
   6  -7   0    0.59    1.66
   6  -7   0    0.92    1.79
   6  -7   0   -1.89    1.70
  -6   7   0   -1.52    1.83
  -6   7   0    1.88    1.90
  -6   7   0   -1.16    1.72
   5  -7   0    3.55    1.80
   5  -7   0    0.14    1.70
   5  -7   0    2.93    1.77
  -5   7   0    3.71    1.89
  -5   7   0    4.57    2.17
  -5   7   0    2.37    1.80
   4  -7   0    2.82    1.64
   4  -7   0    7.99    1.90
   4  -7   0    6.55    1.97
  -4   7   0    6.80    2.30
  -4   7   0    4.26    1.90
  -4   7   0    4.02    1.74
   3  -7   0    1.89    1.38
   3  -7   0   -0.55    1.56
   3  -7   0    1.49    1.65
  -3   7   0    0.93    1.51
  -3   7   0    2.15    1.56
  -3   7   0    2.98    1.66
  -3   7   0    0.30    1.27
   2  -7   0   18.42    2.22
   2  -7   0   19.35    2.30
   2  -7   0   17.51    2.04
  -2   7   0   19.37    2.77
  -2   7   0   17.84    2.20
  -2   7   0   21.32    2.32
   1  -7   0    4.17    1.14
   1  -7   0    5.20    1.49
   1  -7   0    5.74    1.13
   1  -7   0    3.50    1.40
   1  -7   0    4.96    1.38
  -1   7   0    6.06    1.51
  -1   7   0    5.88    0.95
  -1   7   0    3.86    1.79
  -1   7   0    7.52    1.75
  -1   7   0    6.06    1.15
   0  -7   0    0.32    1.31
   0  -7   0   -0.74    1.09
   0  -7   0    0.60    1.19
   0  -7   0    0.62    1.03
   0  -7   0   -1.20    0.75
   0   7   0   -0.71    1.33
   0   7   0    0.57    1.02
   0   7   0    2.34    0.81
   0   7   0    0.46    1.61
   0   7   0    1.31    1.10
  -1  -7   0   -0.01    1.14
  -1  -7   0    0.25    1.22
  -1  -7   0    0.34    0.72
  -1  -7   0    1.47    1.20
  -1  -7   0   -0.14    1.09
   1   7   0    1.62    1.49
   1   7   0    0.63    1.63
   1   7   0    0.62    0.96
   1   7   0    0.00    1.04
  -2  -7   0   13.94    1.93
  -2  -7   0   12.79    1.66
  -2  -7   0   16.57    2.46
  -2  -7   0   11.57    1.04
  -2  -7   0   13.88    2.03
   2   7   0   14.02    1.97
   2   7   0   13.07    2.24
   2   7   0   12.26    1.37
   2   7   0   13.66    2.17
  -3  -7   0    4.97    2.00
  -3  -7   0    3.87    1.49
  -3  -7   0    2.09    1.50
  -3  -7   0    3.94    1.22
  -3  -7   0    3.68    0.51
   3   7   0    0.53    1.46
   3   7   0    2.75    1.71
   3   7   0    3.56    1.48
   3   7   0    4.79    0.99
  -4  -7   0   21.74    2.10
  -4  -7   0   19.48    2.27
  -4  -7   0   21.26    2.64
  -4  -7   0   22.20    3.20
   4   7   0   22.68    2.73
   4   7   0   26.37    2.83
   4   7   0   19.04    2.60
   4   7   0   19.38    1.46
  -5  -7   0    0.77    1.41
  -5  -7   0    3.04    2.22
  -5  -7   0    3.03    1.79
  -5  -7   0   -0.39    1.22
   5   7   0    1.67    1.75
   5   7   0    1.99    1.90
   5   7   0    1.16    1.41
   5   7   0   -0.44    0.89
  -6  -7   0    0.92    1.87
  -6  -7   0   -1.36    1.10
  -6  -7   0    0.23    1.47
  -6  -7   0    1.40    2.31
   6   7   0    0.28    1.78
   6   7   0   -1.58    1.72
   6   7   0   -1.05    1.82
  -7  -7   0   -0.31    2.40
  -7  -7   0    1.56    1.64
  -7  -7   0    0.80    1.98
  -7  -7   0    0.94    1.52
   7   7   0    0.35    1.91
   7   7   0    2.73    2.15
   7   7   0    2.88    2.49
   7   7   0    0.30    2.01
  -8  -7   0    6.86    1.71
  -8  -7   0    8.55    2.63
  -8  -7   0    9.84    2.24
  -8  -7   0    6.30    3.17
   8   7   0    7.92    2.51
   8   7   0    8.42    2.37
   8   7   0    8.11    3.04
   8   7   0    7.94    2.71
  -9  -7   0    1.71    1.52
  -9  -7   0    3.82    3.35
  -9  -7   0    2.94    2.00
   9   7   0    8.25    3.17
   9   7   0    3.62    2.18
   9   7   0    6.59    2.40
 -10  -7   0    1.35    1.95
 -10  -7   0   -1.41    3.24
 -10  -7   0    1.77    1.95
  10   7   0   11.18    3.15
  10   7   0    2.90    2.30
  10   7   0    1.84    2.16
   6  -8   0    1.45    2.05
   6  -8   0    3.75    2.02
   6  -8   0    1.30    1.72
  -6   8   0    3.93    2.16
  -6   8   0    1.13    2.25
   5  -8   0   11.65    2.41
   5  -8   0   10.56    2.14
   5  -8   0   12.08    2.52
  -5   8   0   10.25    2.68
  -5   8   0   10.59    2.48
   4  -8   0   13.67    2.36
   4  -8   0   15.69    2.48
   4  -8   0   11.43    2.32
  -4   8   0   13.32    2.50
  -4   8   0   13.53    2.50
   3  -8   0    1.23    1.66
   3  -8   0    0.66    1.38
   3  -8   0    0.48    1.65
  -3   8   0    0.28    1.48
  -3   8   0    2.91    2.19
   2  -8   0    7.55    1.64
   2  -8   0    8.06    1.93
   2  -8   0    4.18    1.62
  -2   8   0    8.98    1.94
  -2   8   0    8.37    2.21
  -2   8   0    7.17    2.33
   1  -8   0    2.56    1.28
   1  -8   0    4.62    1.62
   1  -8   0    4.82    1.74
  -1   8   0    5.13    1.75
  -1   8   0    7.00    1.95
  -1   8   0    3.32    2.09
   0  -8   0   11.60    1.72
   0  -8   0   12.01    2.17
   0  -8   0   11.30    1.45
   0  -8   0   10.24    1.86
   0  -8   0    9.70    1.87
   0   8   0   11.25    2.46
   0   8   0    9.56    2.33
   0   8   0   10.60    1.75
   0   8   0   10.40    1.64
  -1  -8   0    1.79    1.33
  -1  -8   0    0.91    1.16
  -1  -8   0   -0.25    0.78
  -1  -8   0   -0.94    1.32
  -1  -8   0   -0.36    1.26
   1   8   0    0.68    1.86
   1   8   0   -0.32    1.68
   1   8   0   -0.17    1.13
   1   8   0    0.65    1.29
  -2  -8   0   -0.35    1.26
  -2  -8   0   -1.54    1.69
  -2  -8   0   -2.39    1.17
  -2  -8   0    0.72    1.48
   2   8   0   -0.32    0.96
   2   8   0   -0.92    1.70
   2   8   0   -1.89    1.67
   2   8   0   -0.64    1.47
  -3  -8   0    6.53    1.75
  -3  -8   0    8.13    2.13
  -3  -8   0    7.78    1.68
  -3  -8   0    8.76    2.65
   3   8   0    7.59    2.13
   3   8   0   10.05    1.33
   3   8   0    6.03    2.11
   3   8   0    8.21    2.25
  -4  -8   0    0.43    1.42
  -4  -8   0   -0.09    2.02
  -4  -8   0    1.16    1.45
  -4  -8   0    0.44    1.66
   4   8   0    1.37    1.94
   4   8   0    1.17    1.71
   4   8   0   -0.68    1.80
  -5  -8   0   22.57    2.66
  -5  -8   0   22.71    3.01
  -5  -8   0   31.69    2.53
  -5  -8   0   22.33    3.71
   5   8   0   21.76    3.06
   5   8   0   25.81    3.26
   5   8   0   27.86    3.15
  -6  -8   0    9.73    2.57
  -6  -8   0   12.85    2.06
  -6  -8   0    9.30    3.05
  -6  -8   0    9.82    2.21
   6   8   0   13.02    2.58
   6   8   0   13.08    2.87
   6   8   0   13.61    2.86
  -7  -8   0    1.12    2.08
  -7  -8   0   -0.61    1.63
  -7  -8   0   -0.31    2.63
  -7  -8   0   -0.51    1.43
   7   8   0    0.26    2.11
   7   8   0    2.12    2.69
   7   8   0   -3.94    1.88
   7   8   0   -0.16    2.22
  -8  -8   0   18.29    2.77
  -8  -8   0   18.61    2.25
  -8  -8   0   20.76    3.94
   8   8   0   18.75    3.19
   8   8   0   18.67    3.60
   8   8   0   14.78    2.95
  -9  -8   0    1.69    1.75
  -9  -8   0    5.05    3.60
  -9  -8   0    5.77    2.25
   9   8   0    4.39    2.54
   9   8   0    4.47    2.76
   9   8   0    7.68    3.10
 -10  -8   0   -0.58    3.40
 -10  -8   0   -0.25    2.25
  10   8   0    2.62    2.42
  10   8   0   -0.20    2.54
  10   8   0    9.76    3.19
   5  -9   0    4.66    1.77
   5  -9   0    0.41    2.02
   5  -9   0    0.63    1.69
  -5   9   0    2.90    2.43
  -5   9   0   -1.04    1.86
   4  -9   0    6.43    1.95
   4  -9   0   12.18    2.35
   4  -9   0   10.77    2.50
  -4   9   0   11.76    2.53
  -4   9   0    5.77    2.56
   3  -9   0    5.69    2.00
   3  -9   0    2.25    1.95
   3  -9   0    4.90    1.72
  -3   9   0    4.75    1.94
  -3   9   0    2.58    2.41
   2  -9   0   13.55    2.16
   2  -9   0   15.44    2.35
   2  -9   0    9.89    2.16
  -2   9   0    9.34    2.46
  -2   9   0   15.31    3.04
  -2   9   0   10.69    2.37
   1  -9   0   -1.23    1.62
   1  -9   0    1.29    1.41
   1  -9   0    2.00    1.55
  -1   9   0    0.73    1.47
  -1   9   0   -0.42    1.54
  -1   9   0   -0.74    1.97
   0  -9   0    2.02    1.64
   0  -9   0    4.65    1.79
   0  -9   0    2.27    1.24
   0   9   0    5.54    2.33
   0   9   0    5.09    1.70
   0   9   0    4.94    2.20
  -1  -9   0    1.16    1.52
  -1  -9   0    1.96    1.46
  -1  -9   0    1.96    1.88
  -1  -9   0    3.69    1.59
   1   9   0    3.14    1.64
   1   9   0    1.22    1.22
   1   9   0    2.46    2.22
   1   9   0    1.22    2.08
  -2  -9   0    3.12    1.80
  -2  -9   0    2.52    1.69
  -2  -9   0    6.78    1.82
  -2  -9   0    4.73    2.40
   2   9   0    3.63    2.22
   2   9   0    4.94    1.42
   2   9   0    4.68    1.96
   2   9   0    2.98    2.25
  -3  -9   0   34.33    2.85
  -3  -9   0   32.16    3.06
  -3  -9   0   31.91    3.58
  -3  -9   0   26.14    2.87
   3   9   0   26.89    3.08
   3   9   0   32.63    3.54
   3   9   0   34.29    3.17
  -4  -9   0   31.71    3.28
  -4  -9   0   35.83    4.42
  -4  -9   0   35.57    2.82
  -4  -9   0   30.64    3.09
   4   9   0   28.64    3.41
   4   9   0   28.50    3.35
   4   9   0   33.27    3.69
  -5  -9   0    2.93    1.93
  -5  -9   0    0.82    1.52
  -5  -9   0    3.42    2.07
  -5  -9   0    2.65    2.68
   5   9   0    2.27    2.44
   5   9   0    2.13    2.29
   5   9   0    2.99    2.16
  -6  -9   0    3.20    1.92
  -6  -9   0    5.26    2.31
  -6  -9   0    1.39    2.51
  -6  -9   0    4.02    1.62
   6   9   0    4.22    2.87
   6   9   0    4.69    2.57
   6   9   0    3.16    2.36
   6   9   0    0.07    2.28
  -7  -9   0   15.63    3.85
  -7  -9   0   15.95    2.72
  -7  -9   0   20.15    2.41
   7   9   0   12.19    2.91
   7   9   0   22.87    4.32
   7   9   0   14.87    3.14
  -8  -9   0    1.50    2.91
  -8  -9   0    2.29    1.82
  -8  -9   0    1.31    2.01
   8   9   0    0.58    2.33
   8   9   0   -3.06    2.20
   8   9   0    5.98    3.00
  -9  -9   0    3.72    3.39
  -9  -9   0    8.05    2.47
   9   9   0    5.22    2.78
   9   9   0   -0.82    2.38
   9   9   0   10.87    3.40
   4 -10   0    1.19    2.12
   4 -10   0    7.77    2.09
   4 -10   0    0.21    1.74
  -4  10   0    3.17    2.16
  -4  10   0    6.91    2.80
   3 -10   0    8.83    2.10
   3 -10   0    4.39    2.03
   3 -10   0    2.30    2.12
  -3  10   0    4.05    2.13
  -3  10   0    7.57    2.21
   2 -10   0    2.50    2.06
   2 -10   0    2.51    1.75
   2 -10   0   -0.24    2.23
  -2  10   0    3.41    1.82
  -2  10   0   -0.41    2.24
   1 -10   0    9.08    2.07
   1 -10   0    7.94    2.23
  -1  10   0    3.57    2.68
  -1  10   0    5.86    2.08
  -1  10   0    7.84    1.99
   0 -10   0    1.60    1.81
   0 -10   0    4.91    1.97
   0  10   0    8.64    2.63
   0  10   0    5.29    1.84
   0  10   0    5.01    2.47
  -1 -10   0    1.41    1.68
  -1 -10   0    0.82    1.74
   1  10   0    1.22    2.23
   1  10   0   -1.23    2.54
   1  10   0   -0.45    1.44
  -2 -10   0   11.42    2.39
  -2 -10   0    9.27    2.12
  -2 -10   0   13.94    3.09
  -2 -10   0   11.33    2.28
   2  10   0   20.04    3.25
   2  10   0   11.83    2.88
   2  10   0   10.23    2.84
   2  10   0   10.38    2.43
  -3 -10   0   26.99    3.09
  -3 -10   0   28.19    2.87
  -3 -10   0   23.58    3.08
  -3 -10   0   29.12    3.95
   3  10   0   27.99    3.56
   3  10   0   24.58    3.08
   3  10   0   34.49    3.75
   3  10   0   31.11    3.79
  -4 -10   0   -0.25    1.70
  -4 -10   0   -2.26    1.47
  -4 -10   0    1.35    1.95
  -4 -10   0   -0.54    2.25
   4  10   0   -2.20    2.20
   4  10   0    8.33    2.98
   4  10   0    1.15    1.86
   4  10   0    0.33    1.95
  -5 -10   0    1.20    1.69
  -5 -10   0    0.98    1.78
  -5 -10   0    1.03    2.02
  -5 -10   0   -0.26    2.54
   5  10   0    6.28    3.06
   5  10   0    1.34    2.08
   5  10   0   -3.22    2.17
   5  10   0    3.83    2.67
  -6 -10   0    5.52    2.14
  -6 -10   0    9.04    2.37
  -6 -10   0    8.56    3.38
   6  10   0    8.07    3.03
   6  10   0   15.39    3.75
   6  10   0    4.03    2.50
  -7 -10   0   -0.56    2.68
  -7 -10   0    1.05    1.98
  -7 -10   0    1.30    1.69
   7  10   0    1.62    2.65
   7  10   0   -1.79    2.36
   7  10   0    9.13    3.51
  -8 -10   0    4.09    2.22
  -8 -10   0    3.21    2.19
  -8 -10   0    5.02    3.33
   8  10   0   16.12    4.05
   8  10   0    3.46    2.36
   8  10   0   -1.82    2.56
   2 -11   0   13.41    2.47
   2 -11   0    8.34    2.47
  -2  11   0   13.32    2.68
  -2  11   0    8.20    2.97
   1 -11   0    3.92    1.90
   1 -11   0   -0.50    1.95
  -1  11   0    1.39    2.36
  -1  11   0    2.07    1.95
   0 -11   0    4.39    2.12
   0 -11   0   -0.06    1.94
   0  11   0   -5.14    2.32
   0  11   0    4.06    2.06
  -1 -11   0    5.59    2.03
  -1 -11   0    5.41    2.20
   1  11   0    7.43    2.70
   1  11   0    0.77    2.86
  -2 -11   0    6.35    2.08
  -2 -11   0    3.40    2.00
   2  11   0   -3.97    2.42
   2  11   0    4.56    2.64
  -3 -11   0    1.68    2.54
  -3 -11   0    0.69    1.80
  -3 -11   0    1.87    1.92
  -3 -11   0   -2.04    1.64
   3  11   0    7.73    2.34
   3  11   0    0.03    2.40
   3  11   0    2.86    1.94
   3  11   0    0.18    2.67
  -4 -11   0   -1.45    1.87
  -4 -11   0   -2.41    2.55
  -4 -11   0    2.00    2.09
  -4 -11   0   -2.10    1.54
   4  11   0   -0.03    2.66
   4  11   0   11.85    3.19
   4  11   0    3.16    2.35
   4  11   0   -0.49    1.79
  -5 -11   0   -1.50    1.82
  -5 -11   0    2.66    3.09
  -5 -11   0    0.70    1.86
   5  11   0   -0.46    2.68
   5  11   0   13.43    3.62
   5  11   0   -0.24    2.58
  -6 -11   0   -0.67    2.79
  -6 -11   0    2.93    2.11
  -6 -11   0    0.18    1.85
   6  11   0    0.64    2.93
   6  11   0   -3.48    2.73
   6  11   0   14.88    3.85
  -7 -11   0   -0.50    2.85
  -7 -11   0    2.43    2.15
  -7 -11   0    1.16    2.11
   7  11   0    9.52    3.56
   7  11   0   -3.64    2.62
   7  11   0   -1.37    2.48
   0 -12   0    4.47    2.09
  -1 -12   0    0.91    1.91
  -1 -12   0    0.66    1.99
   1  12   0    2.21    2.52
   1  12   0   -4.66    2.69
  -2 -12   0    3.07    2.07
  -2 -12   0   -2.36    1.81
   2  12   0   -3.01    2.79
   2  12   0   -1.09    2.33
  -3 -12   0   -0.62    2.21
  -3 -12   0    0.99    1.88
   3  12   0   -0.46    2.99
   3  12   0    0.80    1.97
  -4 -12   0    2.48    2.12
  -4 -12   0    1.67    1.90
  -4 -12   0   -1.42    2.63
   4  12   0   -4.35    2.42
   4  12   0   -3.55    2.73
  -5 -12   0    0.86    2.74
  -5 -12   0   -0.63    1.82
  -5 -12   0    0.72    1.97
   5  12   0   -2.51    2.95
   5  12   0   10.33    3.30
   5  12   0    0.97    2.12
   4  12  -1   -6.26    2.35
   4  12  -1   -1.28    3.05
  -4 -12   1    0.61    2.68
  -4 -12   1    2.81    2.23
  -4 -12   1    0.77    1.94
   3  12  -1   -0.16    2.65
   3  12  -1   -4.06    2.84
  -3 -12   1    4.07    2.18
  -3 -12   1   -2.28    1.79
   2  12  -1   -0.77    2.97
   2  12  -1    2.73    2.76
  -2 -12   1    1.60    1.91
  -2 -12   1    1.43    1.97
   7  11  -1    0.15    2.78
   7  11  -1   -0.42    2.90
  -7 -11   1    0.49    3.15
  -7 -11   1    1.51    2.25
   6  11  -1    0.41    2.84
   6  11  -1    2.35    2.29
  -6 -11   1    0.89    2.03
  -6 -11   1    3.43    3.30
   5  11  -1   -1.41    2.50
   5  11  -1   -2.05    2.49
  -5 -11   1    0.15    2.51
  -5 -11   1    0.29    1.81
  -5 -11   1    2.75    1.80
   4  11  -1   -0.39    2.41
   4  11  -1    0.68    2.71
   4  11  -1    4.54    2.28
  -4 -11   1    3.46    1.89
  -4 -11   1   -0.35    1.86
  -4 -11   1    7.99    2.22
  -4 -11   1    5.10    2.95
   3  11  -1    1.47    2.57
   3  11  -1    8.11    2.28
   3  11  -1    9.75    3.16
  -3 -11   1    4.57    2.77
  -3 -11   1    3.50    2.17
  -3 -11   1    5.05    2.12
  -3 -11   1   10.02    2.29
   2  11  -1   -0.34    2.44
   2  11  -1   -2.23    2.83
  -2 -11   1   -0.33    1.69
  -2 -11   1    0.88    1.77
   1  11  -1   -3.92    2.19
   1  11  -1   -2.44    2.22
  -1 -11   1    0.21    1.81
  -1 -11   1    5.87    2.09
   0  11  -1    7.72    2.64
   0  11  -1    5.45    2.74
   0 -11   1    7.47    2.15
   0 -11   1    5.19    2.24
  -1  11  -1   -0.99    2.12
  -1  11  -1    1.22    1.64
   1 -11   1    2.13    1.85
   1 -11   1    1.66    2.11
  -2  11  -1    7.05    2.17
   2 -11   1    3.80    2.01
   8  10  -1   -6.10    2.92
   8  10  -1   11.50    3.67
   8  10  -1    1.36    2.90
  -8 -10   1    2.59    2.19
  -8 -10   1    2.91    3.24
   7  10  -1   -2.05    2.55
   7  10  -1    6.40    3.19
  -7 -10   1    1.48    2.87
  -7 -10   1    3.17    2.16
   6  10  -1    0.42    2.66
   6  10  -1   -0.45    2.39
  -6 -10   1   -0.07    1.77
  -6 -10   1   -0.32    1.87
  -6 -10   1   -1.34    2.52
   5  10  -1    2.36    2.52
   5  10  -1   -4.30    1.69
   5  10  -1    2.96    2.77
  -5 -10   1    1.70    2.03
  -5 -10   1    3.33    1.73
  -5 -10   1   -1.25    2.47
  -5 -10   1    0.66    1.84
   4  10  -1   17.46    3.38
   4  10  -1   13.23    3.04
   4  10  -1   12.90    2.74
  -4 -10   1   14.52    2.22
  -4 -10   1   17.91    3.74
  -4 -10   1   12.03    2.57
  -4 -10   1   12.39    2.59
   3  10  -1   -0.98    2.25
   3  10  -1    1.25    2.42
   3  10  -1    1.53    1.90
  -3 -10   1   -2.52    2.02
  -3 -10   1    0.13    1.63
  -3 -10   1   -0.25    1.60
  -3 -10   1    1.27    1.76
   2  10  -1   -0.13    2.26
   2  10  -1    2.01    1.92
   2  10  -1   -2.66    2.20
  -2 -10   1    2.21    1.77
  -2 -10   1   -0.36    1.55
  -2 -10   1    1.19    2.29
  -2 -10   1    0.63    1.51
   1  10  -1    0.60    2.32
   1  10  -1    5.03    1.76
   1  10  -1    0.06    2.17
  -1 -10   1    4.18    1.95
  -1 -10   1    4.39    1.87
   0  10  -1   -0.10    2.41
   0  10  -1    3.62    2.34
   0  10  -1    2.59    1.70
   0 -10   1    2.15    1.91
   0 -10   1   -1.14    1.64
  -1  10  -1   -1.24    1.49
  -1  10  -1   -2.21    2.08
   1 -10   1   -0.62    1.75
   1 -10   1    3.10    1.87
  -2  10  -1    8.31    2.32
  -2  10  -1    4.39    2.53
   2 -10   1    4.01    1.84
   2 -10   1    0.89    1.98
  -3  10  -1    3.14    2.47
  -3  10  -1    2.45    1.91
   3 -10   1    5.99    1.97
   3 -10   1    3.14    2.20
   9   9  -1   12.46    3.54
   9   9  -1   21.20    4.18
   9   9  -1   14.68    3.26
  -9  -9   1    9.89    2.66
  -9  -9   1   12.00    4.19
   8   9  -1    2.90    2.58
   8   9  -1   -1.46    2.41
   8   9  -1    9.76    3.55
  -8  -9   1    3.14    2.07
  -8  -9   1    1.34    3.05
   7   9  -1    6.99    2.33
   7   9  -1    2.29    2.58
  -7  -9   1    8.25    1.82
  -7  -9   1    8.39    2.25
  -7  -9   1    6.93    3.23
   6   9  -1    2.22    2.52
   6   9  -1    5.00    2.44
   6   9  -1    3.06    2.09
  -6  -9   1    6.91    2.52
  -6  -9   1    1.56    1.84
  -6  -9   1    5.40    1.71
  -6  -9   1    5.62    3.06
   5   9  -1   20.36    3.33
   5   9  -1   18.02    3.06
   5   9  -1   11.44    2.81
  -5  -9   1   15.51    2.58
  -5  -9   1   17.72    2.25
  -5  -9   1   16.18    2.87
  -5  -9   1   14.75    3.56
   4   9  -1    9.84    2.72
   4   9  -1    7.74    2.51
   4   9  -1    7.72    2.66
  -4  -9   1    5.69    1.73
  -4  -9   1    5.96    2.19
  -4  -9   1    3.84    2.51
  -4  -9   1    6.13    1.68
   3   9  -1    2.85    1.87
   3   9  -1   -1.00    2.12
   3   9  -1    0.29    2.25
   3   9  -1    2.00    1.53
  -3  -9   1   -0.04    1.50
  -3  -9   1    2.39    2.26
  -3  -9   1    1.78    1.76
  -3  -9   1    0.45    1.63
   2   9  -1    2.75    1.39
   2   9  -1    4.85    2.26
   2   9  -1    4.77    1.76
   2   9  -1    2.08    2.03
  -2  -9   1    4.22    1.73
  -2  -9   1    4.23    2.15
  -2  -9   1    3.60    1.68
  -2  -9   1    0.86    1.59
   1   9  -1    3.06    1.61
   1   9  -1   -3.88    2.03
   1   9  -1   -0.49    2.09
   1   9  -1    2.87    1.74
  -1  -9   1    2.69    2.06
  -1  -9   1    1.34    1.52
  -1  -9   1    0.15    1.52
  -1  -9   1    1.31    1.62
   0   9  -1    2.85    2.35
   0   9  -1    5.72    1.88
   0   9  -1    4.86    2.38
   0  -9   1    4.56    1.78
   0  -9   1    4.36    1.86
  -1   9  -1    6.38    2.51
  -1   9  -1    2.01    2.25
  -1   9  -1    4.56    1.78
   1  -9   1    4.41    1.87
   1  -9   1    3.13    1.41
   1  -9   1    5.68    1.91
  -2   9  -1    4.95    1.90
  -2   9  -1    4.88    2.51
   2  -9   1    6.56    1.77
   2  -9   1    4.43    1.94
   2  -9   1    3.49    1.89
  -3   9  -1    6.75    2.61
  -3   9  -1    3.98    2.00
   3  -9   1    3.37    2.01
   3  -9   1    3.93    1.65
   3  -9   1    5.54    1.97
  -4   9  -1    3.11    2.26
  -4   9  -1    7.76    2.72
   4  -9   1    3.65    1.87
   4  -9   1    2.65    1.88
   4  -9   1   -0.02    1.98
  -5   9  -1    2.43    2.42
  -5   9  -1    3.74    2.14
   5  -9   1   -2.07    2.02
   5  -9   1   -1.72    1.50
   5  -9   1    4.36    1.91
  10   8  -1   12.82    3.44
  10   8  -1    3.25    2.49
  10   8  -1    0.39    2.37
 -10  -8   1    2.56    2.27
 -10  -8   1   -0.31    3.50
   9   8  -1   11.83    3.31
   9   8  -1    6.83    2.69
   9   8  -1    4.16    2.55
  -9  -8   1    1.14    1.93
  -9  -8   1    3.36    3.43
   8   8  -1    0.22    2.07
   8   8  -1   -4.06    2.01
  -8  -8   1   -0.75    2.83
  -8  -8   1    1.55    1.90
  -8  -8   1    1.39    1.60
   7   8  -1    2.41    2.31
   7   8  -1    3.59    2.43
   7   8  -1    5.36    2.45
  -7  -8   1    1.49    1.81
  -7  -8   1   -1.67    2.40
  -7  -8   1    3.45    1.62
  -7  -8   1    2.03    2.09
   6   8  -1    4.73    2.27
   6   8  -1    6.82    2.50
   6   8  -1    3.79    2.33
  -6  -8   1    7.82    1.75
  -6  -8   1    8.02    2.15
  -6  -8   1    5.31    2.30
  -6  -8   1    8.03    3.06
   5   8  -1    7.48    2.38
   5   8  -1   10.99    2.61
   5   8  -1    7.86    2.46
  -5  -8   1    8.67    2.92
  -5  -8   1    9.90    1.87
  -5  -8   1    8.09    2.11
  -5  -8   1   11.63    2.57
   4   8  -1    9.49    2.10
   4   8  -1    8.14    1.41
   4   8  -1    5.78    2.25
   4   8  -1   12.54    2.48
  -4  -8   1    7.72    1.61
  -4  -8   1    7.42    2.61
  -4  -8   1    6.09    1.87
  -4  -8   1    5.30    2.03
   3   8  -1   16.97    1.80
   3   8  -1   19.24    2.84
   3   8  -1   13.71    2.63
   3   8  -1   17.95    2.60
  -3  -8   1   18.68    2.12
  -3  -8   1   21.63    2.54
  -3  -8   1   18.75    2.57
  -3  -8   1   19.79    3.19
   2   8  -1    0.73    2.00
   2   8  -1    1.70    1.77
   2   8  -1    1.34    1.56
   2   8  -1    1.43    1.21
  -2  -8   1   -0.06    1.47
  -2  -8   1    0.50    1.30
  -2  -8   1   -0.09    1.83
  -2  -8   1   -1.46    1.33
   1   8  -1   -0.09    1.24
   1   8  -1   -0.72    1.30
   1   8  -1   -2.55    1.76
   1   8  -1    0.51    1.71
  -1  -8   1   -0.69    1.60
  -1  -8   1    0.32    1.40
  -1  -8   1   -1.05    1.28
  -1  -8   1    0.50    1.34
   0   8  -1    2.08    1.35
   0   8  -1   -0.86    1.60
   0   8  -1    1.57    1.29
   0   8  -1   -1.41    1.38
   0  -8   1   -1.15    1.34
   0  -8   1    0.28    1.00
   0  -8   1    0.33    1.15
   0  -8   1    0.59    1.46
   0  -8   1    0.92    1.52
  -1   8  -1    6.01    2.23
  -1   8  -1    3.58    2.03
  -1   8  -1    4.57    1.68
   1  -8   1    4.80    1.38
   1  -8   1    6.20    1.78
   1  -8   1    4.27    1.70
  -2   8  -1   -4.50    1.63
  -2   8  -1    0.82    2.15
  -2   8  -1    3.07    1.77
   2  -8   1    1.13    1.52
   2  -8   1    2.26    1.50
   2  -8   1   -0.30    1.61
  -3   8  -1    2.78    1.80
  -3   8  -1    3.61    1.62
  -3   8  -1    4.82    2.48
   3  -8   1    7.10    2.06
   3  -8   1    4.61    1.68
   3  -8   1    6.40    2.01
  -4   8  -1    3.59    1.72
  -4   8  -1    6.86    2.50
  -4   8  -1    5.37    2.04
   4  -8   1    7.48    1.93
   4  -8   1    6.87    2.13
   4  -8   1    3.37    2.10
  -5   8  -1    1.93    1.87
  -5   8  -1    1.93    2.15
  -5   8  -1   -0.53    1.76
   5  -8   1   -0.19    1.91
   5  -8   1    2.54    1.77
   5  -8   1    2.87    1.89
  -6   8  -1    1.40    2.14
  -6   8  -1   -0.66    1.93
  -6   8  -1    3.52    2.39
   6  -8   1    1.73    2.00
   6  -8   1    3.02    1.88
   6  -8   1   -4.09    1.80
  10   7  -1    3.55    2.49
  10   7  -1   -1.61    2.11
  10   7  -1    5.83    2.85
 -10  -7   1   -0.75    1.86
 -10  -7   1   -0.95    3.21
   9   7  -1    1.88    2.22
   9   7  -1    1.65    2.19
   9   7  -1    5.52    2.69
  -9  -7   1   -0.28    1.77
  -9  -7   1    0.17    2.92
   8   7  -1    1.61    2.14
   8   7  -1    1.05    2.10
   8   7  -1    1.63    2.23
  -8  -7   1    0.90    2.07
  -8  -7   1    1.68    1.53
  -8  -7   1   -1.26    2.69
  -8  -7   1    0.38    1.93
   7   7  -1    8.33    2.69
   7   7  -1    8.34    2.55
   7   7  -1    4.97    2.28
  -7  -7   1    8.29    3.18
  -7  -7   1   12.03    2.31
  -7  -7   1    9.06    2.59
  -7  -7   1    9.91    1.78
   6   7  -1    3.17    2.10
   6   7  -1    1.67    1.96
   6   7  -1    3.15    2.02
  -6  -7   1    1.17    1.30
  -6  -7   1    3.14    1.78
  -6  -7   1    3.65    2.49
  -6  -7   1    5.20    2.10
   5   7  -1   -1.52    1.63
   5   7  -1   -0.01    1.83
   5   7  -1   -1.05    1.08
   5   7  -1   -0.04    1.76
  -5  -7   1    0.16    1.61
  -5  -7   1    0.86    1.09
  -5  -7   1   -0.59    1.42
  -5  -7   1    2.18    2.20
   4   7  -1    2.02    1.76
   4   7  -1    1.29    1.06
   4   7  -1    1.82    1.83
   4   7  -1    1.17    1.35
  -4  -7   1    2.09    1.26
  -4  -7   1    3.39    1.71
  -4  -7   1    1.52    1.99
  -4  -7   1    0.35    1.34
   3   7  -1    1.31    1.74
   3   7  -1    1.52    1.78
   3   7  -1    0.56    1.03
   3   7  -1    2.51    1.55
  -3  -7   1    0.87    1.44
  -3  -7   1    1.27    1.06
  -3  -7   1    1.29    1.33
  -3  -7   1    1.49    1.81
   2   7  -1   16.91    2.29
   2   7  -1   13.15    2.30
   2   7  -1   15.30    2.25
   2   7  -1   15.77    1.68
  -2  -7   1   14.38    2.01
  -2  -7   1   15.33    2.15
  -2  -7   1   16.01    2.66
  -2  -7   1   12.32    0.96
  -2  -7   1   14.04    1.75
   1   7  -1   -1.04    1.35
   1   7  -1   -0.83    1.60
   1   7  -1    0.34    1.11
   1   7  -1   -0.19    1.12
  -1  -7   1   -1.58    1.02
  -1  -7   1    0.04    0.98
  -1  -7   1    1.26    0.74
  -1  -7   1    1.08    1.40
  -1  -7   1   -0.71    1.02
   0   7  -1   11.30    1.89
   0   7  -1    9.47    1.58
   0   7  -1   10.95    1.41
   0   7  -1   10.86    2.26
   0   7  -1    9.68    1.55
   0  -7   1   10.42    1.29
   0  -7   1   11.10    1.61
   0  -7   1    8.49    1.60
   0  -7   1   10.67    1.80
   0  -7   1    9.52    1.84
  -1   7  -1    0.28    1.44
  -1   7  -1   -2.31    1.40
  -1   7  -1    0.11    1.33
  -1   7  -1    1.22    1.00
   1  -7   1    0.68    1.17
   1  -7   1    1.76    1.03
   1  -7   1    2.33    1.57
   1  -7   1   -0.27    1.31
   1  -7   1    1.55    1.05
  -2   7  -1    1.63    1.95
  -2   7  -1   -0.77    1.20
  -2   7  -1    0.98    1.46
  -2   7  -1   -1.31    1.47
   2  -7   1    1.58    1.31
   2  -7   1    1.54    1.54
   2  -7   1    1.37    1.18
  -3   7  -1    2.79    1.74
  -3   7  -1    4.87    2.20
  -3   7  -1    5.20    1.57
   3  -7   1    3.64    1.72
   3  -7   1    2.55    1.71
   3  -7   1    3.70    1.51
  -4   7  -1   11.05    2.06
  -4   7  -1   10.75    2.25
  -4   7  -1    9.44    2.56
   4  -7   1    7.47    2.00
   4  -7   1   10.70    2.13
   4  -7   1   10.32    2.00
  -5   7  -1    4.50    2.04
  -5   7  -1    2.39    1.80
  -5   7  -1    4.32    2.19
   5  -7   1    3.23    1.96
   5  -7   1    4.33    1.87
   5  -7   1    2.34    2.01
  -6   7  -1    2.70    2.29
  -6   7  -1    1.67    2.04
  -6   7  -1    5.49    2.14
   6  -7   1    3.55    1.95
   6  -7   1    6.29    2.16
   6  -7   1    3.28    2.11
  -7   7  -1    3.42    2.29
  -7   7  -1    0.75    2.09
  -7   7  -1   -2.26    1.71
   7  -7   1    1.89    2.19
   7  -7   1   -1.55    1.81
   7  -7   1   -0.12    1.76
  10   6  -1   10.66    3.09
  10   6  -1    1.06    2.07
  10   6  -1    1.94    2.24
 -10  -6   1   -0.33    3.24
 -10  -6   1    3.24    2.00
   9   6  -1    1.96    2.59
   9   6  -1    4.75    2.71
   9   6  -1    0.68    1.56
   9   6  -1   -1.77    1.76
  -9  -6   1    4.81    2.48
  -9  -6   1    2.63    2.67
  -9  -6   1   -1.03    1.67
  -9  -6   1    0.52    2.93
  -9  -6   1   -0.29    1.43
   8   6  -1    3.03    2.12
   8   6  -1    5.15    2.36
   8   6  -1    3.62    2.27
  -8  -6   1    2.15    1.50
  -8  -6   1    3.92    2.95
  -8  -6   1    3.61    2.38
  -8  -6   1    4.46    1.94
  -8  -6   1    3.93    2.27
   7   6  -1    8.49    1.54
   7   6  -1    6.97    2.31
   7   6  -1    7.97    2.15
   7   6  -1   10.70    2.15
  -7  -6   1    8.33    1.97
  -7  -6   1   10.75    3.10
  -7  -6   1    9.57    1.66
  -7  -6   1   12.30    2.28
  -7  -6   1   11.37    2.52
   6   6  -1    1.48    1.16
   6   6  -1    0.55    1.79
   6   6  -1    3.49    1.83
   6   6  -1    1.60    1.78
  -6  -6   1    3.54    2.33
  -6  -6   1    0.43    1.37
  -6  -6   1    2.44    1.07
  -6  -6   1    2.41    1.83
   5   6  -1   22.57    2.87
   5   6  -1   28.75    2.94
   5   6  -1   27.68    2.80
   5   6  -1   25.85    1.88
  -5  -6   1   27.90    2.84
  -5  -6   1   26.45    2.00
  -5  -6   1   24.27    2.46
  -5  -6   1   24.99    3.44
   4   6  -1   16.47    2.28
   4   6  -1   16.27    1.53
   4   6  -1   16.94    2.40
   4   6  -1   15.80    2.24
  -4  -6   1   14.50    1.61
  -4  -6   1   15.40    1.96
  -4  -6   1   14.52    2.26
  -4  -6   1   10.72    2.44
   3   6  -1   73.67    3.67
   3   6  -1   79.82    3.57
   3   6  -1   74.20    3.45
   3   6  -1   67.86    2.57
  -3  -6   1   75.87    2.87
  -3  -6   1   74.51    3.23
  -3  -6   1   68.89    3.50
  -3  -6   1   75.26    4.04
   2   6  -1    3.90    1.54
   2   6  -1    1.27    1.55
   2   6  -1    5.75    1.17
  -2  -6   1    2.73    1.30
  -2  -6   1    3.32    0.52
  -2  -6   1    2.56    1.64
  -2  -6   1    2.91    1.07
  -2  -6   1    4.31    1.35
   1   6  -1   14.69    1.89
   1   6  -1    9.48    1.35
   1   6  -1   10.75    1.78
   1   6  -1   12.11    1.39
  -1  -6   1   10.92    0.99
  -1  -6   1   11.59    1.45
  -1  -6   1   11.44    2.04
  -1  -6   1    9.97    1.62
  -1  -6   1   13.51    1.64
   0   6  -1    4.39    1.53
   0   6  -1    8.35    1.39
   0   6  -1    4.73    1.83
   0  -6   1    6.24    1.29
   0  -6   1    6.56    1.27
   0  -6   1    8.44    1.63
   0  -6   1    6.15    1.27
   0  -6   1    6.81    1.05
  -1   6  -1   34.05    1.83
  -1   6  -1   35.56    2.31
  -1   6  -1   34.63    2.02
  -1   6  -1   35.98    2.37
  -1   6  -1   32.82    2.38
   1  -6   1   35.09    2.10
   1  -6   1   32.21    2.12
   1  -6   1   33.33    1.91
   1  -6   1   36.34    2.39
   1  -6   1   37.68    2.08
  -2   6  -1    6.29    1.60
  -2   6  -1    3.96    1.07
  -2   6  -1    6.34    1.31
  -2   6  -1    4.11    1.47
  -2   6  -1    8.31    2.03
   2  -6   1    5.81    1.59
   2  -6   1    6.03    1.58
   2  -6   1    6.41    1.38
   2  -6   1    7.03    0.98
   2  -6   1    6.65    1.18
  -3   6  -1   11.13    1.67
  -3   6  -1    5.68    1.75
  -3   6  -1    7.33    2.12
  -3   6  -1    8.14    1.57
   3  -6   1    7.54    1.60
   3  -6   1    9.82    1.86
   3  -6   1    8.91    1.81
  -4   6  -1    4.23    1.80
  -4   6  -1    7.04    2.23
  -4   6  -1    2.06    1.52
   4  -6   1    5.97    1.83
   4  -6   1    7.05    1.85
   4  -6   1    4.06    1.61
  -5   6  -1    1.61    1.94
  -5   6  -1    1.45    1.65
  -5   6  -1    0.24    1.62
   5  -6   1    0.54    1.89
   5  -6   1    1.62    1.58
   5  -6   1    1.56    1.68
  -6   6  -1   -1.85    1.69
  -6   6  -1   -0.17    1.76
  -6   6  -1    0.47    1.84
   6  -6   1   -1.17    1.67
   6  -6   1   -2.45    1.63
   6  -6   1    2.00    1.73
  -7   6  -1    0.83    1.92
  -7   6  -1    6.61    2.32
  -7   6  -1    2.20    2.05
   7  -6   1    3.62    2.27
   7  -6   1    2.91    1.90
   7  -6   1   -0.33    1.84
  -8   6  -1    2.18    2.28
  -8   6  -1    0.33    2.04
  -8   6  -1    1.85    2.03
   8  -6   1    0.13    2.08
   8  -6   1    0.78    1.87
  11   5  -1    2.16    2.02
  11   5  -1    7.26    2.00
  11   5  -1   -0.46    1.82
  11   5  -1    9.78    2.82
 -11  -5   1   -0.84    2.45
 -11  -5   1    0.80    2.14
 -11  -5   1    0.59    3.32
  10   5  -1   -1.46    1.66
  10   5  -1    5.66    2.39
  10   5  -1    1.99    2.05
 -10  -5   1    2.62    1.90
 -10  -5   1   -0.21    1.43
 -10  -5   1    0.11    3.03
 -10  -5   1   -3.48    2.04
   9   5  -1    2.67    2.29
   9   5  -1    1.07    1.88
   9   5  -1    3.75    2.07
   9   5  -1    3.47    2.58
  -9  -5   1   -1.20    2.73
  -9  -5   1   -1.23    1.58
  -9  -5   1    0.46    1.32
  -9  -5   1   -2.56    2.05
  -9  -5   1    3.20    2.30
   8   5  -1   12.00    2.48
   8   5  -1   11.19    2.29
   8   5  -1    9.17    1.71
   8   5  -1   10.81    2.59
  -8  -5   1   10.19    2.54
  -8  -5   1    9.17    1.75
  -8  -5   1   12.03    3.50
  -8  -5   1   13.27    2.63
  -8  -5   1   12.74    2.19
   7   5  -1    3.39    1.23
   7   5  -1    4.01    1.96
   7   5  -1    5.50    1.15
   7   5  -1    4.61    1.84
   7   5  -1    5.08    1.67
  -7  -5   1    3.30    2.07
  -7  -5   1    4.57    1.36
  -7  -5   1    3.99    1.00
  -7  -5   1    3.57    1.67
  -7  -5   1    5.68    1.76
  -7  -5   1    5.16    1.71
   6   5  -1    2.51    0.78
   6   5  -1   -1.19    0.89
   6   5  -1    0.98    1.44
   6   5  -1    0.60    1.37
   6   5  -1    0.92    1.59
  -6  -5   1    1.46    0.97
  -6  -5   1    0.57    1.57
  -6  -5   1    1.28    0.69
  -6  -5   1    2.14    1.68
  -6  -5   1   -0.19    1.27
  -6  -5   1    0.98    1.90
   5   5  -1   31.16    2.83
   5   5  -1   27.78    2.49
   5   5  -1   24.45    2.00
   5   5  -1   24.23    1.61
   5   5  -1   27.18    1.16
  -5  -5   1   25.63    1.11
  -5  -5   1   28.52    2.21
  -5  -5   1   28.46    1.87
  -5  -5   1   27.72    3.02
  -5  -5   1   25.68    2.78
  -5  -5   1   26.36    2.47
   4   5  -1   24.44    0.64
   4   5  -1   25.26    1.93
   4   5  -1   24.55    1.99
   4   5  -1   28.92    1.64
   4   5  -1   24.72    0.66
   4   5  -1   27.21    2.61
  -4  -5   1   25.42    2.79
  -4  -5   1   32.10    2.63
  -4  -5   1   27.52    2.06
  -4  -5   1   28.30    2.09
  -4  -5   1   27.62    1.76
   3   5  -1  148.75    4.78
   3   5  -1  142.11    3.83
   3   5  -1  138.15    4.50
  -3  -5   1  145.31    4.94
  -3  -5   1  143.26    4.02
  -3  -5   1  143.60    4.46
  -3  -5   1  138.38    5.34
   2   5  -1   16.50    1.43
   2   5  -1   23.23    2.31
   2   5  -1   17.95    1.78
   2   5  -1   18.98    2.04
  -2  -5   1   19.91    1.63
  -2  -5   1   18.34    1.95
  -2  -5   1   18.41    1.82
  -2  -5   1   16.20    0.62
  -2  -5   1   16.42    0.68
  -2  -5   1   19.70    2.46
   1   5  -1    0.28    0.86
   1   5  -1    0.62    0.79
   1   5  -1    0.94    1.19
   1   5  -1    1.07    1.12
  -1  -5   1    1.12    1.38
  -1  -5   1    1.23    0.55
  -1  -5   1    0.22    1.04
  -1  -5   1    0.55    1.11
  -1  -5   1   -0.71    0.82
   0   5  -1   34.63    1.86
   0   5  -1   36.76    2.47
   0   5  -1   34.67    2.04
   0   5  -1   38.46    1.65
   0   5  -1   37.56    2.08
   0  -5   1   36.22    2.03
   0  -5   1   38.86    2.03
   0  -5   1   35.98    2.24
   0  -5   1   37.09    1.69
   0  -5   1   33.58    2.11
  -1   5  -1   11.75    1.59
  -1   5  -1   12.46    1.75
  -1   5  -1   13.20    1.27
  -1   5  -1   12.52    1.30
  -1   5  -1   15.49    1.60
   1  -5   1   13.01    1.58
   1  -5   1   12.32    1.41
   1  -5   1   12.70    1.29
   1  -5   1   15.46    1.78
   1  -5   1    9.90    1.22
  -2   5  -1    4.40    1.24
  -2   5  -1    3.11    1.31
  -2   5  -1    4.11    1.19
  -2   5  -1    5.31    0.98
  -2   5  -1    3.24    1.30
   2  -5   1    4.37    1.17
   2  -5   1    4.81    0.81
   2  -5   1    6.18    1.03
   2  -5   1    3.24    1.33
   2  -5   1    3.57    1.08
  -3   5  -1   20.56    2.47
  -3   5  -1   16.07    0.92
  -3   5  -1   18.00    1.90
  -3   5  -1   18.15    2.17
  -3   5  -1   18.34    1.55
   3  -5   1   19.85    2.06
   3  -5   1   18.57    2.09
   3  -5   1   18.78    1.01
   3  -5   1   17.75    0.91
   3  -5   1   21.92    2.07
  -4   5  -1    2.15    0.98
  -4   5  -1    1.42    1.30
  -4   5  -1   -0.78    1.47
  -4   5  -1    0.43    1.38
   4  -5   1    1.92    1.46
   4  -5   1   -0.42    1.20
   4  -5   1    2.89    1.59
  -5   5  -1   51.72    3.27
  -5   5  -1   55.88    3.47
  -5   5  -1   58.13    3.50
   5  -5   1   58.47    3.28
   5  -5   1   56.94    3.09
   5  -5   1   52.98    3.34
  -6   5  -1   10.68    2.31
  -6   5  -1   11.05    2.38
  -6   5  -1   12.07    2.07
   6  -5   1   10.10    1.92
   6  -5   1    9.90    2.16
   6  -5   1    8.28    2.09
  -7   5  -1    4.17    2.03
  -7   5  -1    3.87    2.04
  -7   5  -1    3.31    1.98
   7  -5   1    2.82    1.86
   7  -5   1    2.31    1.97
   7  -5   1    2.65    1.57
  -8   5  -1    0.20    1.85
  -8   5  -1    2.50    2.12
  -8   5  -1    3.14    2.06
   8  -5   1   -6.36    1.93
   8  -5   1    1.35    1.82
   8  -5   1   -0.62    1.79
  11   4  -1    3.90    2.67
  11   4  -1    9.18    2.54
  11   4  -1    4.90    2.04
  11   4  -1    4.42    1.66
  11   4  -1    3.52    1.98
 -11  -4   1    0.34    1.83
 -11  -4   1   -2.29    2.87
 -11  -4   1    1.01    2.38
  10   4  -1    6.21    1.85
  10   4  -1    6.16    2.38
  10   4  -1    6.17    1.80
  10   4  -1    8.45    2.71
  10   4  -1    4.39    1.94
  10   4  -1    5.03    1.81
  10   4  -1    6.55    2.06
 -10  -4   1    2.60    2.08
 -10  -4   1    4.23    2.29
 -10  -4   1    5.44    3.29
 -10  -4   1    2.57    1.79
 -10  -4   1    1.31    1.99
   9   4  -1    3.91    1.82
   9   4  -1    0.59    1.82
   9   4  -1    4.44    2.32
   9   4  -1    2.28    1.59
   9   4  -1    1.49    1.47
   9   4  -1    2.80    1.88
  -9  -4   1    4.59    1.98
  -9  -4   1    2.24    2.05
  -9  -4   1    3.33    2.70
  -9  -4   1   -0.74    1.78
  -9  -4   1    1.53    1.41
  -9  -4   1    1.44    1.44
   8   4  -1    4.88    1.83
   8   4  -1    4.94    1.95
   8   4  -1    6.09    1.58
   8   4  -1    8.01    1.57
   8   4  -1    4.93    2.08
  -8  -4   1    7.14    2.26
  -8  -4   1    3.78    2.03
  -8  -4   1    4.53    1.38
  -8  -4   1    3.19    1.35
  -8  -4   1    4.97    1.71
  -8  -4   1    7.95    2.95
   7   4  -1    1.04    1.04
   7   4  -1    1.79    1.30
   7   4  -1    4.15    1.86
   7   4  -1    3.49    1.78
   7   4  -1    3.48    1.22
  -7  -4   1    3.58    2.37
  -7  -4   1    2.93    1.44
  -7  -4   1    1.74    1.18
  -7  -4   1    3.34    1.51
  -7  -4   1    1.88    0.97
  -7  -4   1    2.50    1.76
   6   4  -1   14.86    1.54
   6   4  -1   14.55    2.17
   6   4  -1   14.28    2.03
   6   4  -1   13.38    1.32
   6   4  -1   13.45    1.98
  -6  -4   1   13.35    1.86
  -6  -4   1   14.09    1.55
  -6  -4   1   14.77    2.03
  -6  -4   1   14.77    2.78
  -6  -4   1   14.02    1.26
  -6  -4   1   13.03    2.23
   5   4  -1   50.57    1.79
   5   4  -1   44.31    2.77
   5   4  -1   48.13    2.08
   5   4  -1   50.56    2.69
   5   4  -1   44.65    3.07
  -5  -4   1   50.13    2.21
  -5  -4   1   48.23    3.09
  -5  -4   1   48.92    1.73
  -5  -4   1   50.53    2.86
  -5  -4   1   47.30    3.43
  -5  -4   1   46.13    2.47
   4   4  -1   50.73    2.71
   4   4  -1   49.60    2.58
   4   4  -1   44.01    2.66
   4   4  -1   47.46    1.94
   4   4  -1   49.20    1.46
  -4  -4   1   47.86    2.65
  -4  -4   1   48.61    2.69
  -4  -4   1   46.87    1.94
  -4  -4   1   45.03    2.34
  -4  -4   1   45.44    1.42
  -4  -4   1   45.20    2.93
   3   4  -1   58.45    2.62
   3   4  -1   60.88    2.76
   3   4  -1   60.13    2.14
   3   4  -1   54.28    2.79
  -3  -4   1   57.82    2.95
  -3  -4   1   58.95    3.34
  -3  -4   1   56.13    2.56
  -3  -4   1   59.57    2.54
  -3  -4   1   60.44    2.18
   2   4  -1  164.63    4.09
   2   4  -1  164.60    4.73
   2   4  -1  162.87    4.70
  -2  -4   1  163.08    4.85
  -2  -4   1  168.99    4.17
  -2  -4   1  159.79    5.23
  -2  -4   1  158.77    4.50
   1   4  -1   44.78    2.09
   1   4  -1   45.27    1.92
   1   4  -1   44.86    2.16
   1   4  -1   47.15    2.41
  -1  -4   1   45.20    1.37
  -1  -4   1   46.75    1.89
  -1  -4   1   43.94    2.18
  -1  -4   1   45.83    2.14
  -1  -4   1   43.08    2.41
   0   4  -1   15.04    1.33
   0   4  -1   14.76    1.39
   0   4  -1   13.32    1.78
   0   4  -1   14.56    1.08
   0   4  -1   13.23    1.30
   0  -4   1   12.70    1.04
   0  -4   1   16.55    1.39
   0  -4   1   15.37    1.47
   0  -4   1   12.36    1.29
   0  -4   1   14.19    1.61
  -1   4  -1   27.44    1.50
  -1   4  -1   28.69    1.82
  -1   4  -1   26.30    1.67
  -1   4  -1   25.67    2.08
  -1   4  -1   26.94    1.52
   1  -4   1   25.39    1.50
   1  -4   1   27.95    1.62
   1  -4   1   25.73    1.86
   1  -4   1   27.97    1.59
   1  -4   1   26.85    1.47
  -2   4  -1    4.51    1.11
  -2   4  -1    6.21    1.18
  -2   4  -1    5.17    0.89
  -2   4  -1    4.86    1.31
  -2   4  -1    5.09    1.54
   2  -4   1    5.06    1.31
   2  -4   1    5.97    1.23
   2  -4   1    4.10    1.04
   2  -4   1    5.68    0.76
   2  -4   1    6.66    0.94
  -3   4  -1   27.97    1.94
  -3   4  -1   28.81    1.98
  -3   4  -1   28.66    1.56
  -3   4  -1   26.78    1.07
  -3   4  -1   27.67    2.20
   3  -4   1   25.95    1.93
   3  -4   1   29.80    2.11
   3  -4   1   26.68    2.07
   3  -4   1   29.24    1.07
   3  -4   1   27.79    1.16
  -4   4  -1    7.13    1.67
  -4   4  -1    6.02    1.43
  -4   4  -1    2.60    1.41
  -4   4  -1    7.70    1.04
   4  -4   1    8.23    1.56
   4  -4   1    7.44    0.49
   4  -4   1    5.83    0.51
   4  -4   1    7.72    0.53
   4  -4   1    8.64    1.71
   4  -4   1    5.12    1.52
  -5   4  -1    3.53    1.65
  -5   4  -1    3.55    0.97
  -5   4  -1    2.35    1.39
  -5   4  -1    3.10    1.56
   5  -4   1    0.67    1.41
   5  -4   1    3.72    1.51
   5  -4   1    1.46    1.49
  -6   4  -1    9.20    2.19
  -6   4  -1   13.36    2.17
  -6   4  -1   17.22    2.47
   6  -4   1   14.22    2.23
   6  -4   1   14.81    2.19
   6  -4   1    9.87    2.05
  -7   4  -1   -0.04    1.72
  -7   4  -1    2.51    1.89
  -7   4  -1    6.16    2.06
   7  -4   1    0.92    1.79
   7  -4   1    4.03    1.84
   7  -4   1    1.03    1.72
  -8   4  -1   17.42    2.69
  -8   4  -1   14.82    2.73
  -8   4  -1   12.11    2.66
   8  -4   1   11.24    2.47
   8  -4   1    9.73    2.06
   8  -4   1    9.15    2.25
  -9   4  -1    3.72    2.34
  -9   4  -1    2.87    1.94
  -9   4  -1    3.55    2.21
   9  -4   1    1.88    2.10
   9  -4   1    0.27    2.59
   9  -4   1    3.38    2.07
  11   3  -1   -0.27    1.49
  11   3  -1    3.53    1.77
  11   3  -1   10.41    2.43
  11   3  -1    2.56    1.55
  11   3  -1    4.13    1.73
  11   3  -1    2.62    1.75
  11   3  -1    3.60    1.83
 -11  -3   1   -3.97    1.81
 -11  -3   1   -1.91    1.80
 -11  -3   1    0.57    2.88
 -11  -3   1    1.74    1.76
 -11  -3   1    2.78    2.27
 -11  -3   1   -1.20    1.57
 -11  -3   1   -0.06    1.81
  10   3  -1    2.80    1.75
  10   3  -1    4.90    1.68
  10   3  -1    5.21    1.81
  10   3  -1    3.27    1.82
  10   3  -1    3.69    2.25
  10   3  -1    4.80    1.73
  10   3  -1    6.30    2.28
  10   3  -1    6.21    2.03
 -10  -3   1    1.87    1.98
 -10  -3   1    2.21    1.64
 -10  -3   1    3.00    1.64
 -10  -3   1    1.92    1.97
 -10  -3   1    1.62    1.91
 -10  -3   1    1.67    1.70
 -10  -3   1    0.25    3.05
   9   3  -1    3.40    1.81
   9   3  -1    0.48    1.34
   9   3  -1   -0.39    1.27
   9   3  -1    0.66    1.60
   9   3  -1    0.58    1.82
   9   3  -1    1.49    2.22
   9   3  -1    1.83    1.46
   9   3  -1    2.21    1.51
  -9  -3   1    1.27    1.78
  -9  -3   1    0.03    1.36
  -9  -3   1    2.21    1.88
  -9  -3   1    1.72    1.70
  -9  -3   1   -0.23    2.37
  -9  -3   1    1.13    1.43
  -9  -3   1   -1.54    1.17
  -9  -3   1    0.39    1.80
   8   3  -1   -0.13    1.82
   8   3  -1   -1.83    1.41
   8   3  -1    0.87    1.23
   8   3  -1    0.37    1.33
   8   3  -1   -0.04    1.45
   8   3  -1    2.48    1.84
  -8  -3   1   -0.05    1.42
  -8  -3   1    2.85    1.66
  -8  -3   1   -0.13    1.21
  -8  -3   1    1.34    1.31
  -8  -3   1    0.79    1.66
  -8  -3   1   -0.18    2.15
  -8  -3   1   -0.32    1.66
  -8  -3   1   -0.31    1.13
   7   3  -1    1.80    1.56
   7   3  -1    2.66    1.13
   7   3  -1    2.56    1.50
   7   3  -1    1.90    1.30
   7   3  -1    3.52    1.71
  -7  -3   1    0.15    1.57
  -7  -3   1    0.83    1.47
  -7  -3   1    1.19    2.01
  -7  -3   1    3.84    1.75
  -7  -3   1    2.37    1.36
  -7  -3   1    2.29    0.98
  -7  -3   1    2.80    1.09
  -7  -3   1    3.70    1.35
   6   3  -1    8.49    1.89
   6   3  -1    7.47    1.71
   6   3  -1    6.45    1.20
   6   3  -1    7.98    1.63
   6   3  -1    8.49    1.25
  -6  -3   1    6.05    1.37
  -6  -3   1    4.43    1.59
  -6  -3   1    7.01    1.81
  -6  -3   1    7.73    1.60
  -6  -3   1    7.17    1.16
  -6  -3   1    6.59    1.15
  -6  -3   1    6.89    1.30
  -6  -3   1    9.08    2.32
   5   3  -1    2.36    0.81
   5   3  -1    2.53    1.48
   5   3  -1    3.00    1.28
   5   3  -1    2.70    1.00
   5   3  -1    3.53    1.37
  -5  -3   1    2.78    1.67
  -5  -3   1    2.11    0.76
  -5  -3   1    2.57    1.35
  -5  -3   1    2.71    1.39
  -5  -3   1    4.83    1.20
  -5  -3   1    1.01    1.16
  -5  -3   1    2.10    0.90
   4   3  -1   62.13    2.89
   4   3  -1   59.23    2.16
   4   3  -1   61.68    3.03
   4   3  -1   63.43    3.13
   4   3  -1   60.46    2.68
  -4  -3   1   68.03    2.91
  -4  -3   1   63.67    2.25
  -4  -3   1   70.20    3.19
  -4  -3   1   64.64    3.47
  -4  -3   1   64.06    2.56
  -4  -3   1   62.03    1.92
   3   3  -1   16.85    1.18
   3   3  -1   20.68    1.68
   3   3  -1   16.44    0.83
   3   3  -1   15.55    1.43
   3   3  -1   17.74    0.79
  -3  -3   1   17.23    2.19
  -3  -3   1   17.83    1.88
  -3  -3   1   15.04    1.41
  -3  -3   1   16.71    1.46
  -3  -3   1   16.26    0.75
  -3  -3   1   14.94    1.06
   2   3  -1  693.71   13.94
   2   3  -1  701.94   14.58
   2   3  -1  671.43   14.44
   2   3  -1  614.10   14.58
  -2  -3   1  715.38   13.96
  -2  -3   1  707.95   15.25
  -2  -3   1  697.58   14.78
  -2  -3   1  692.65   14.33
  -2  -3   1  719.39   14.59
   1   3  -1    2.81    0.80
   1   3  -1    2.48    1.15
   1   3  -1    2.54    0.97
   1   3  -1    1.11    0.81
  -1  -3   1    1.97    0.66
  -1  -3   1    1.58    0.34
  -1  -3   1    2.62    0.94
  -1  -3   1    0.71    1.07
  -1  -3   1    1.37    0.35
  -1  -3   1    1.66    0.91
   0   3  -1   32.71    1.25
   0   3  -1   28.96    1.62
   0   3  -1   29.33    1.53
   0   3  -1   32.71    1.53
   0   3  -1   30.16    1.52
   0  -3   1   30.45    1.58
   0  -3   1   29.33    1.21
   0  -3   1   31.70    1.69
   0  -3   1   28.93    1.48
   0  -3   1   30.46    1.74
  -1   3  -1  137.17    3.43
  -1   3  -1  133.39    3.39
  -1   3  -1  134.78    3.50
  -1   3  -1  134.91    3.76
  -1   3  -1  136.67    3.96
   1  -3   1  131.16    3.55
   1  -3   1  132.50    3.35
   1  -3   1  133.17    3.65
   1  -3   1  142.73    3.80
  -2   3  -1    3.91    1.29
  -2   3  -1    3.26    0.71
  -2   3  -1    1.48    1.09
  -2   3  -1    3.77    0.86
  -2   3  -1    3.21    0.99
   2  -3   1    4.56    1.23
   2  -3   1    3.79    0.74
   2  -3   1    3.18    0.62
   2  -3   1    1.64    1.01
  -3   3  -1    2.89    0.74
  -3   3  -1    1.66    0.53
  -3   3  -1    0.72    1.01
  -3   3  -1    1.99    0.96
  -3   3  -1    0.98    1.17
   3  -3   1    2.28    0.65
   3  -3   1    1.58    1.17
   3  -3   1    1.83    0.58
   3  -3   1    0.35    1.00
  -4   3  -1    3.63    0.61
  -4   3  -1    3.04    1.27
  -4   3  -1    2.33    1.28
  -4   3  -1    4.20    0.78
  -4   3  -1    1.85    1.16
   4  -3   1    3.65    0.71
   4  -3   1    4.95    1.11
   4  -3   1    3.93    0.63
   4  -3   1    2.86    0.82
   4  -3   1    3.20    1.33
  -5   3  -1   72.95    3.37
  -5   3  -1   81.23    2.52
  -5   3  -1   74.34    3.42
  -5   3  -1   82.09    3.63
   5  -3   1   70.29    2.60
   5  -3   1   76.40    3.39
   5  -3   1   75.14    2.43
   5  -3   1   82.70    3.57
   5  -3   1   76.35    2.32
   5  -3   1   78.39    3.30
  -6   3  -1    5.44    1.78
  -6   3  -1    2.72    1.48
  -6   3  -1    1.23    1.43
   6  -3   1    1.30    1.47
   6  -3   1    1.95    1.21
   6  -3   1    4.94    1.80
  -7   3  -1    2.30    1.41
  -7   3  -1    2.09    1.63
  -7   3  -1    3.45    1.90
   7  -3   1    2.97    1.44
   7  -3   1    2.91    1.80
   7  -3   1    0.68    1.58
  -8   3  -1    8.80    2.32
  -8   3  -1   10.28    2.22
  -8   3  -1    7.40    2.24
   8  -3   1    6.82    2.09
   8  -3   1    6.81    2.12
   8  -3   1    5.63    2.07
  -9   3  -1   -2.06    1.75
  -9   3  -1    0.62    1.89
  -9   3  -1    0.16    1.99
   9  -3   1   -0.56    1.82
   9  -3   1   -1.84    1.70
   9  -3   1   -3.62    2.03
  11   2  -1    3.46    1.86
  11   2  -1   -0.36    1.51
  11   2  -1    3.43    1.79
  11   2  -1    4.83    1.78
 -11  -2   1    1.16    1.86
 -11  -2   1    0.56    1.98
 -11  -2   1    0.93    2.02
 -11  -2   1    1.15    1.80
  10   2  -1    6.14    1.93
  10   2  -1   15.54    2.86
  10   2  -1    3.34    1.61
  10   2  -1   11.96    2.25
  10   2  -1   11.51    2.34
  10   2  -1    9.39    2.50
  10   2  -1    6.85    1.85
  10   2  -1    6.65    1.94
 -10  -2   1    4.10    1.96
 -10  -2   1    4.63    1.95
 -10  -2   1    4.28    1.99
 -10  -2   1    5.18    2.27
 -10  -2   1    4.98    2.08
 -10  -2   1    7.34    1.95
 -10  -2   1    5.55    3.19
   9   2  -1    0.54    1.33
   9   2  -1    4.08    1.68
   9   2  -1    2.33    1.55
   9   2  -1    7.07    2.46
   9   2  -1    4.21    1.82
   9   2  -1    2.33    1.62
   9   2  -1    2.71    1.94
   9   2  -1    4.21    1.80
  -9  -2   1    2.39    1.59
  -9  -2   1    4.70    1.93
  -9  -2   1    3.51    1.60
  -9  -2   1    2.19    1.54
  -9  -2   1    2.59    1.66
  -9  -2   1    2.92    1.86
  -9  -2   1    3.52    2.76
   8   2  -1    1.29    1.74
   8   2  -1    1.06    1.31
   8   2  -1   -0.05    1.39
   8   2  -1   -0.92    1.25
   8   2  -1   -0.37    1.28
   8   2  -1    1.82    1.54
   8   2  -1   -0.02    1.32
   8   2  -1    0.89    1.44
  -8  -2   1    1.70    1.40
  -8  -2   1    2.49    1.72
  -8  -2   1   -0.80    1.49
  -8  -2   1   -1.70    1.10
  -8  -2   1   -2.24    1.31
  -8  -2   1    1.98    2.14
  -8  -2   1    0.00    1.42
  -8  -2   1    0.56    1.54
   7   2  -1    1.71    1.17
   7   2  -1    0.22    1.26
   7   2  -1    0.98    1.41
   7   2  -1    1.35    1.35
   7   2  -1   -0.35    1.08
   7   2  -1    1.78    1.20
  -7  -2   1    0.22    1.18
  -7  -2   1    0.80    1.13
  -7  -2   1    1.43    1.07
  -7  -2   1    0.14    1.29
  -7  -2   1    1.28    1.46
  -7  -2   1    0.72    1.34
  -7  -2   1    0.15    1.78
  -7  -2   1    2.16    1.53
   6   2  -1   -0.12    0.97
   6   2  -1   -0.03    1.08
   6   2  -1   -0.10    1.17
   6   2  -1    0.79    1.26
   6   2  -1    0.70    1.17
  -6  -2   1   -0.43    0.96
  -6  -2   1    1.36    1.30
  -6  -2   1    1.11    1.26
  -6  -2   1   -0.06    1.49
  -6  -2   1    1.90    0.99
  -6  -2   1    1.23    0.90
  -6  -2   1   -0.46    1.08
  -6  -2   1   -0.57    1.06
   5   2  -1    3.99    1.42
   5   2  -1    5.53    1.37
   5   2  -1    4.75    1.10
   5   2  -1    6.39    1.09
  -5  -2   1    5.35    1.35
  -5  -2   1    4.28    1.68
  -5  -2   1    4.77    1.35
  -5  -2   1    6.97    1.19
  -5  -2   1    5.93    1.10
  -5  -2   1    5.32    1.43
  -5  -2   1    6.30    1.19
  -5  -2   1    6.60    1.06
   4   2  -1    2.17    0.70
   4   2  -1    2.44    1.23
   4   2  -1    1.56    0.88
   4   2  -1    3.08    1.00
   4   2  -1    1.95    1.09
  -4  -2   1    2.74    1.08
  -4  -2   1    2.53    0.75
  -4  -2   1    2.60    0.81
  -4  -2   1    3.35    0.96
  -4  -2   1    0.86    1.11
  -4  -2   1    3.71    1.00
  -4  -2   1    3.64    1.53
  -4  -2   1    3.95    1.29
   3   2  -1   63.03    2.54
   3   2  -1   64.39    1.84
   3   2  -1   64.18    2.66
   3   2  -1   58.50    1.99
   3   2  -1   62.58    2.43
  -3  -2   1   61.18    1.95
  -3  -2   1   64.25    2.24
  -3  -2   1   64.77    1.82
  -3  -2   1   65.86    2.55
  -3  -2   1   65.31    2.41
  -3  -2   1   61.44    2.65
  -3  -2   1   64.07    2.97
   2   2  -1    9.30    1.23
   2   2  -1    7.52    1.20
   2   2  -1   10.21    0.92
   2   2  -1    7.50    0.51
   2   2  -1    8.47    0.51
  -2  -2   1   10.17    1.03
  -2  -2   1   10.77    1.43
  -2  -2   1    8.40    1.11
  -2  -2   1    8.49    0.51
  -2  -2   1    9.25    1.23
  -2  -2   1    7.47    0.69
   1   2  -1  674.68   13.24
   1   2  -1  656.20   13.63
   1   2  -1  663.02   13.52
   1   2  -1  664.58   13.51
  -1  -2   1  638.10   13.08
  -1  -2   1  668.94   13.49
  -1  -2   1  660.20   13.93
  -1  -2   1  654.28   13.38
  -1  -2   1  671.99   13.65
   0   2  -1  201.12    4.73
   0   2  -1  204.08    4.55
   0   2  -1  197.12    4.44
   0   2  -1  200.05    4.22
   0   2  -1  191.68    4.52
   0  -2   1  195.90    4.54
   0  -2   1  195.65    4.75
   0  -2   1  200.28    4.63
   0  -2   1  198.47    4.40
  -1   2  -1   89.25    2.73
  -1   2  -1   88.94    2.35
  -1   2  -1   89.50    2.26
  -1   2  -1   90.40    2.67
  -1   2  -1   90.24    2.47
   1  -2   1   88.98    2.31
   1  -2   1   86.88    2.46
   1  -2   1   89.63    2.57
   1  -2   1   88.73    2.67
  -2   2  -1   28.90    1.64
  -2   2  -1   29.37    1.44
  -2   2  -1   29.32    1.14
  -2   2  -1   28.87    1.17
  -2   2  -1   28.84    1.70
   2  -2   1   29.09    1.30
   2  -2   1   29.44    1.65
   2  -2   1   30.85    1.22
   2  -2   1   31.05    1.81
  -3   2  -1    3.12    1.11
  -3   2  -1    5.20    1.13
  -3   2  -1    4.98    0.69
  -3   2  -1    4.50    1.24
  -3   2  -1    4.93    0.73
   3  -2   1    5.72    1.05
   3  -2   1    4.71    0.84
   3  -2   1    5.31    1.16
   3  -2   1    8.22    1.31
  -4   2  -1    2.98    1.21
  -4   2  -1    5.13    0.79
  -4   2  -1    5.04    1.35
  -4   2  -1    3.25    0.74
  -4   2  -1    3.06    1.17
   4  -2   1    3.94    1.21
   4  -2   1    2.27    1.16
   4  -2   1    3.89    0.90
   4  -2   1    3.91    0.78
   4  -2   1    4.51    1.09
  -5   2  -1    4.40    1.32
  -5   2  -1    4.81    1.47
  -5   2  -1    4.12    0.86
  -5   2  -1    3.38    1.12
   5  -2   1    4.38    1.05
   5  -2   1    2.61    1.26
   5  -2   1    2.57    1.16
   5  -2   1    3.44    1.28
   5  -2   1    4.69    0.91
  -6   2  -1    8.11    1.15
  -6   2  -1    4.19    1.63
  -6   2  -1    5.13    1.52
  -6   2  -1    5.53    1.63
   6  -2   1    4.47    1.24
   6  -2   1    6.97    1.09
   6  -2   1    6.09    1.52
   6  -2   1    2.80    1.46
   6  -2   1    2.54    1.47
  -7   2  -1   11.38    2.22
  -7   2  -1   13.49    2.15
  -7   2  -1   14.47    2.25
   7  -2   1   11.88    2.03
   7  -2   1    9.94    2.08
   7  -2   1   11.79    2.10
  -8   2  -1    2.71    1.80
  -8   2  -1    1.92    1.80
  -8   2  -1    1.83    1.77
   8  -2   1    1.74    1.70
   8  -2   1   -0.18    1.67
   8  -2   1   -0.94    1.55
  -9   2  -1    0.78    1.75
  -9   2  -1    2.93    1.95
  -9   2  -1    1.75    2.00
   9  -2   1   -1.22    1.68
   9  -2   1   -0.05    1.68
   9  -2   1    0.04    1.91
 -10   2  -1    2.32    2.13
 -10   2  -1    2.99    2.18
 -10   2  -1    3.42    2.12
  10  -2   1    2.56    2.06
  10  -2   1    5.79    2.16
  10  -2   1   -1.00    1.87
  11   1  -1    5.61    1.87
  11   1  -1   -2.19    1.46
  11   1  -1    7.14    1.98
  11   1  -1    0.04    1.82
 -11  -1   1   -0.10    1.81
 -11  -1   1    2.13    1.89
 -11  -1   1    2.91    2.02
  10   1  -1    3.04    1.69
  10   1  -1    6.15    2.29
  10   1  -1    8.58    2.22
  10   1  -1    6.71    1.76
  10   1  -1    8.16    2.17
 -10  -1   1    4.71    1.98
 -10  -1   1    3.69    1.83
 -10  -1   1    6.57    2.27
 -10  -1   1    7.57    2.26
 -10  -1   1    7.65    2.41
   9   1  -1    6.27    1.93
   9   1  -1    7.83    1.98
   9   1  -1    8.67    1.86
   9   1  -1    7.75    1.83
   9   1  -1   10.33    2.08
   9   1  -1    7.28    2.03
   9   1  -1    9.62    2.23
  -9  -1   1    7.28    1.91
  -9  -1   1    8.61    1.95
  -9  -1   1    4.24    1.74
  -9  -1   1    6.48    2.05
  -9  -1   1    6.90    1.97
  -9  -1   1    7.57    2.19
  -9  -1   1    7.45    2.60
   8   1  -1    3.72    1.39
   8   1  -1    0.58    1.36
   8   1  -1    4.74    1.75
   8   1  -1    0.99    1.28
   8   1  -1    1.00    1.49
   8   1  -1    0.73    1.42
  -8  -1   1    1.60    1.45
  -8  -1   1   -0.15    1.27
  -8  -1   1   -1.73    1.40
  -8  -1   1    0.79    1.71
  -8  -1   1    1.74    1.46
  -8  -1   1    1.22    1.45
  -8  -1   1    0.22    1.33
  -8  -1   1    2.08    1.95
   7   1  -1    2.07    1.57
   7   1  -1    1.99    1.24
   7   1  -1    2.21    1.18
   7   1  -1    1.16    1.24
   7   1  -1    0.16    1.03
   7   1  -1    2.92    1.39
  -7  -1   1    1.65    1.16
  -7  -1   1    1.23    1.65
  -7  -1   1    1.34    1.20
  -7  -1   1   -0.74    1.13
  -7  -1   1    0.94    1.39
  -7  -1   1    0.63    1.27
  -7  -1   1    0.99    1.41
  -7  -1   1    0.27    1.16
   6   1  -1    1.10    0.95
   6   1  -1    2.35    1.16
   6   1  -1   -0.45    0.97
   6   1  -1    3.72    1.31
  -6  -1   1    2.43    1.25
  -6  -1   1    0.79    0.97
  -6  -1   1    0.80    1.17
  -6  -1   1    1.15    1.18
  -6  -1   1    1.46    1.45
  -6  -1   1    2.18    1.04
  -6  -1   1    2.62    1.20
  -6  -1   1    1.80    1.20
   5   1  -1   14.70    1.87
   5   1  -1   15.33    1.52
   5   1  -1   14.66    1.52
   5   1  -1   17.63    1.87
  -5  -1   1   15.92    1.48
  -5  -1   1   16.98    1.53
  -5  -1   1   19.33    1.89
  -5  -1   1   17.68    1.79
  -5  -1   1   17.69    2.36
  -5  -1   1   14.68    1.59
  -5  -1   1   18.30    1.95
  -5  -1   1   16.02    1.61
   4   1  -1   38.55    1.76
   4   1  -1   34.67    1.81
   4   1  -1   36.99    2.06
   4   1  -1   37.03    2.09
  -4  -1   1   39.12    2.01
  -4  -1   1   40.03    1.68
  -4  -1   1   39.13    1.74
  -4  -1   1   35.09    2.34
  -4  -1   1   36.47    1.74
  -4  -1   1   36.65    1.97
  -4  -1   1   37.54    2.13
  -4  -1   1   36.33    1.81
   3   1  -1  297.73    6.76
   3   1  -1  301.45    6.60
   3   1  -1  303.95    6.99
   3   1  -1  306.10    7.15
  -3  -1   1  303.28    6.99
  -3  -1   1  310.63    6.98
  -3  -1   1  305.96    7.52
  -3  -1   1  303.70    6.57
  -3  -1   1  296.73    6.68
  -3  -1   1  309.43    6.55
  -3  -1   1  318.96    7.20
  -3  -1   1  302.18    6.75
   2   1  -1  303.39    6.72
   2   1  -1  313.97    6.30
   2   1  -1  302.68    6.48
   2   1  -1  302.89    6.87
  -2  -1   1  296.59    6.24
  -2  -1   1  308.33    6.50
  -2  -1   1  306.22    6.74
  -2  -1   1  300.92    6.26
  -2  -1   1  304.29    6.82
  -2  -1   1  301.95    7.09
  -2  -1   1  314.37    6.71
  -2  -1   1  301.26    6.46
   1   1  -1  337.57    6.68
   1   1  -1  336.50    7.10
   1   1  -1  334.44    6.59
   1   1  -1  339.28    6.91
  -1  -1   1  331.82    6.60
  -1  -1   1  351.15    7.12
  -1  -1   1  334.79    7.44
  -1  -1   1  347.04    7.25
  -1  -1   1  336.19    6.68
  -1  -1   1  334.06    6.93
   0   1  -1  360.49    7.25
   0   1  -1  355.66    7.30
   0   1  -1  359.55    7.31
   0   1  -1  353.68    7.09
   0   1  -1  357.23    7.04
   0   1  -1  351.49    7.14
   0   1  -1  345.69    7.12
   0   1  -1  347.64    7.65
   0  -1   1  353.84    7.04
   0  -1   1  356.52    7.46
   0  -1   1  357.36    7.09
   0  -1   1  360.71    7.13
   0  -1   1  346.14    7.14
   0  -1   1  360.75    7.31
   0  -1   1  350.83    7.26
  -1   1  -1    1.90    0.39
  -1   1  -1    2.43    0.62
  -1   1  -1    0.18    0.73
  -1   1  -1   -0.33    0.74
  -1   1  -1    2.30    0.80
  -1   1  -1   -0.48    0.59
   1  -1   1    0.77    0.65
   1  -1   1    1.92    0.69
   1  -1   1    2.85    0.89
   1  -1   1    0.56    0.36
   1  -1   1    0.67    0.80
  -2   1  -1    6.49    1.01
  -2   1  -1    6.52    0.94
  -2   1  -1    6.39    0.72
  -2   1  -1    5.08    1.02
  -2   1  -1    5.50    0.51
  -2   1  -1    6.51    0.85
   2  -1   1    5.27    0.89
   2  -1   1    6.03    0.91
   2  -1   1    4.67    0.54
   2  -1   1    5.97    0.99
   2  -1   1    5.84    0.76
  -3   1  -1   12.65    0.82
  -3   1  -1   12.28    1.10
  -3   1  -1   13.23    1.18
  -3   1  -1   13.60    1.22
  -3   1  -1   13.15    1.28
  -3   1  -1   12.37    1.32
   3  -1   1   13.49    1.25
   3  -1   1   15.37    1.38
   3  -1   1   13.44    1.14
   3  -1   1   13.57    1.33
  -4   1  -1    1.75    0.92
  -4   1  -1    1.61    0.84
  -4   1  -1    3.77    1.08
  -4   1  -1    2.82    1.05
  -4   1  -1    1.56    1.05
  -4   1  -1    4.25    0.79
   4  -1   1    1.27    1.07
   4  -1   1    2.10    0.95
   4  -1   1    1.98    1.09
   4  -1   1    3.03    0.87
   4  -1   1    2.78    1.09
  -5   1  -1    0.35    1.08
  -5   1  -1   -0.74    1.05
  -5   1  -1    0.00    0.78
  -5   1  -1    0.64    1.16
  -5   1  -1    0.87    0.75
  -5   1  -1    0.94    0.69
   5  -1   1   -0.90    0.90
   5  -1   1   -1.05    0.98
   5  -1   1    0.83    1.09
   5  -1   1   -2.53    0.90
   5  -1   1    1.09    0.80
  -6   1  -1    2.03    1.02
  -6   1  -1    0.76    1.25
  -6   1  -1    0.84    0.86
  -6   1  -1    0.97    1.29
  -6   1  -1    1.94    1.17
   6  -1   1    2.52    1.37
   6  -1   1    0.89    0.94
   6  -1   1    0.59    1.09
   6  -1   1    1.89    1.41
   6  -1   1    2.59    1.00
  -7   1  -1   15.61    2.17
  -7   1  -1   14.67    2.06
  -7   1  -1   16.80    2.27
  -7   1  -1   17.84    1.78
  -7   1  -1   19.84    2.41
   7  -1   1   14.24    1.89
   7  -1   1   19.52    2.35
   7  -1   1   16.49    2.09
   7  -1   1   15.39    2.09
  -8   1  -1    2.68    1.70
  -8   1  -1    0.57    1.64
  -8   1  -1    0.97    1.62
   8  -1   1   -1.40    1.46
   8  -1   1   -1.52    1.60
   8  -1   1   -0.91    1.42
  -9   1  -1   12.38    2.45
  -9   1  -1    8.09    2.22
  -9   1  -1   11.94    2.26
   9  -1   1    8.72    2.18
   9  -1   1   11.70    2.35
   9  -1   1    6.58    2.29
 -10   1  -1    2.06    2.08
 -10   1  -1    4.61    2.04
 -10   1  -1    7.45    2.29
  10  -1   1    6.01    2.19
  10  -1   1    0.05    1.92
  10  -1   1   -0.22    1.84
  11   0  -1    4.93    2.05
  11   0  -1    0.97    1.84
  11   0  -1    3.35    2.34
 -11   0   1    1.28    2.24
 -11   0   1    2.69    1.95
 -11   0   1    3.66    2.07
  10   0  -1    3.30    1.94
  10   0  -1   -1.29    1.45
  10   0  -1    6.95    2.04
  10   0  -1    1.46    1.93
 -10   0   1    2.62    2.02
 -10   0   1   -0.88    1.70
 -10   0   1   -4.30    1.72
   9   0  -1    2.69    1.61
   9   0  -1    0.30    1.65
   9   0  -1    0.82    1.61
  -9   0   1    1.34    1.50
  -9   0   1    1.88    1.64
  -9   0   1    0.22    1.67
  -9   0   1    0.65    1.65
   8   0  -1   10.24    2.10
   8   0  -1   11.39    1.88
   8   0  -1   22.87    2.62
   8   0  -1   13.24    2.16
   8   0  -1   11.82    1.94
  -8   0   1   14.37    2.70
  -8   0   1   13.64    2.04
  -8   0   1   15.43    2.21
  -8   0   1   12.93    2.11
  -8   0   1   10.75    2.11
  -8   0   1   14.87    2.36
   7   0  -1    5.04    1.69
   7   0  -1    3.07    1.47
   7   0  -1    4.12    1.29
   7   0  -1    2.91    1.34
   7   0  -1    3.96    1.30
  -7   0   1    4.90    1.87
  -7   0   1    4.40    1.49
  -7   0   1    2.56    1.30
  -7   0   1    3.39    1.52
  -7   0   1    4.94    1.42
  -7   0   1    2.74    1.51
  -7   0   1    3.75    1.34
   6   0  -1   16.80    1.91
   6   0  -1   19.62    1.76
   6   0  -1   18.21    1.80
   6   0  -1   18.89    1.94
   6   0  -1   17.11    1.73
   6   0  -1   19.31    1.79
  -6   0   1   20.50    2.06
  -6   0   1   16.94    1.98
  -6   0   1   17.38    1.86
  -6   0   1   16.48    1.76
  -6   0   1   18.23    2.02
  -6   0   1   17.40    1.87
  -6   0   1   20.10    1.82
  -6   0   1   22.25    2.23
   5   0  -1   79.34    3.06
   5   0  -1   80.68    3.16
   5   0  -1   87.08    2.95
   5   0  -1   84.90    3.13
   5   0  -1   84.28    2.83
  -5   0   1   85.52    3.04
  -5   0   1   80.09    3.00
  -5   0   1   82.98    3.14
  -5   0   1   79.31    2.77
  -5   0   1   79.35    3.45
  -5   0   1   83.26    3.17
  -5   0   1   79.36    3.04
  -5   0   1   86.37    2.92
   4   0  -1   75.00    2.66
   4   0  -1   69.83    2.73
   4   0  -1   77.74    2.54
   4   0  -1   76.45    2.46
   4   0  -1   73.65    2.67
  -4   0   1   75.41    2.77
  -4   0   1   77.00    2.78
  -4   0   1   73.93    2.66
  -4   0   1   76.20    2.65
  -4   0   1   76.82    2.80
  -4   0   1   73.09    2.42
  -4   0   1   75.39    2.50
  -4   0   1   74.94    3.06
   3   0  -1    8.33    0.92
   3   0  -1    9.64    0.96
   3   0  -1    7.66    1.00
   3   0  -1   10.45    1.12
  -3   0   1    9.18    1.13
  -3   0   1   11.84    1.36
  -3   0   1   10.18    0.96
  -3   0   1    8.71    0.91
  -3   0   1    8.55    1.01
  -3   0   1   13.53    1.33
  -3   0   1   11.92    1.23
  -3   0   1   10.85    1.11
   2   0  -1   93.72    2.51
   2   0  -1   92.99    2.34
   2   0  -1   95.63    2.58
  -2   0   1   92.75    2.61
  -2   0   1   95.87    2.65
  -2   0   1   94.57    2.33
  -2   0   1   94.38    2.33
  -2   0   1   93.52    2.46
  -2   0   1   90.46    2.79
  -2   0   1   94.72    2.60
  -2   0   1   98.17    2.60
   1   0  -1  141.81    3.44
   1   0  -1  147.97    3.31
   1   0  -1  146.39    3.04
   1   0  -1  143.58    3.14
   1   0  -1  152.29    3.03
   1   0  -1  151.25    3.27
   1   0  -1  147.49    3.16
   1   0  -1  148.44    3.02
  -1   0   1  152.19    3.27
  -1   0   1  143.48    3.17
  -1   0   1  147.44    3.31
  -1   0   1  144.57    3.29
  -1   0   1  149.84    3.32
  -1   0   1  149.42    3.05
  -1   0   1  145.42    3.45
  -1   0   1  146.91    3.02
  -1   0   1  145.65    3.03
   0   0  -1    1.00    0.20
   0   0   1    0.08    0.25
   0   0   1    1.25    0.21
   0   0   1    2.23    0.25
   0   0   1    0.31    0.20
  -1   0  -1  100.16    2.37
  -1   0  -1  103.34    2.22
  -1   0  -1  101.98    2.34
  -1   0  -1  101.91    2.40
  -1   0  -1  103.29    2.42
  -1   0  -1   98.85    2.55
  -1   0  -1   99.27    2.08
   1   0   1  101.85    2.08
   1   0   1  100.00    2.08
   1   0   1  101.30    2.41
   1   0   1  101.03    2.52
   1   0   1  104.40    2.42
  -2   0  -1  115.31    3.04
  -2   0  -1  120.69    3.07
  -2   0  -1  121.49    2.99
  -2   0  -1  118.70    2.71
  -2   0  -1  122.94    3.08
  -2   0  -1  122.90    3.02
  -2   0  -1  121.53    2.91
   2   0   1  117.94    3.07
   2   0   1  117.56    3.03
   2   0   1  120.64    3.27
  -3   0  -1  112.72    3.18
  -3   0  -1  114.27    3.22
  -3   0  -1  112.57    3.16
  -3   0  -1  109.70    2.80
  -3   0  -1  108.51    3.14
  -3   0  -1  113.79    3.05
  -3   0  -1  110.95    3.15
   3   0   1  108.14    3.16
   3   0   1  112.37    3.16
   3   0   1  110.53    3.42
   3   0   1  113.70    3.16
   3   0   1  116.24    3.22
  -4   0  -1   13.04    1.39
  -4   0  -1   16.86    1.59
  -4   0  -1   16.84    1.54
  -4   0  -1   15.44    1.44
  -4   0  -1   15.94    1.52
  -4   0  -1   14.16    1.14
  -4   0  -1   14.38    1.27
  -4   0  -1   12.93    1.52
   4   0   1   16.13    1.47
   4   0   1   16.40    1.53
   4   0   1   13.19    1.48
   4   0   1   15.15    1.48
   4   0   1   14.43    1.45
  -5   0  -1   16.27    1.62
  -5   0  -1   16.07    1.68
  -5   0  -1   13.77    1.27
  -5   0  -1   15.31    1.63
  -5   0  -1   15.06    1.46
  -5   0  -1   17.39    1.75
   5   0   1   12.89    1.54
   5   0   1   16.38    1.60
   5   0   1   16.90    1.57
   5   0   1   13.75    1.58
   5   0   1   15.78    1.84
  -6   0  -1   55.17    2.75
  -6   0  -1   58.53    2.85
  -6   0  -1   62.59    2.86
  -6   0  -1   57.39    2.44
  -6   0  -1   62.21    2.95
   6   0   1   57.52    2.81
   6   0   1   63.35    3.20
   6   0   1   57.89    2.80
   6   0   1   54.66    2.71
   6   0   1   55.18    2.80
  -7   0  -1    1.43    1.37
  -7   0  -1    0.63    1.10
  -7   0  -1    0.28    1.35
  -7   0  -1    1.33    1.35
  -7   0  -1    1.91    1.25
   7   0   1   -0.86    1.20
   7   0   1    2.13    1.52
   7   0   1    4.57    1.14
   7   0   1   -0.53    1.16
   7   0   1    2.24    1.33
  -8   0  -1    2.63    1.41
  -8   0  -1    2.29    1.58
  -8   0  -1    1.04    1.61
  -8   0  -1    3.67    1.56
  -8   0  -1    4.23    1.73
   8   0   1    2.94    1.58
   8   0   1    6.93    1.41
   8   0   1    3.25    1.86
   8   0   1    1.61    1.59
   8   0   1    1.24    1.43
  -9   0  -1   32.56    3.25
  -9   0  -1   34.07    3.02
  -9   0  -1   27.83    3.03
  -9   0  -1   32.48    3.09
   9   0   1   26.48    2.89
   9   0   1   30.55    3.14
   9   0   1   30.00    3.10
 -10   0  -1    4.61    2.02
 -10   0  -1    1.37    1.72
 -10   0  -1    0.15    1.90
 -10   0  -1    2.17    1.99
  10   0   1    4.23    2.03
  10   0   1    0.92    1.72
  10   0   1    2.29    2.11
  11   0   1   -3.20    2.04
  11   0   1    1.93    1.98
  10  -1  -1    4.04    2.01
  10  -1  -1    0.19    1.74
 -10   1   1   -3.35    1.58
 -10   1   1    2.92    2.01
 -10   1   1   -0.78    1.81
   9  -1  -1   26.48    3.10
   9  -1  -1   19.51    2.53
   9  -1  -1   24.84    2.81
  -9   1   1   26.30    3.01
  -9   1   1   27.19    3.17
  -9   1   1   29.62    3.18
   8  -1  -1    0.45    1.51
   8  -1  -1    1.48    1.53
   8  -1  -1   -2.18    1.31
  -8   1   1    2.58    1.89
  -8   1   1    1.76    1.48
  -8   1   1    0.10    1.62
  -8   1   1    1.06    1.66
   7  -1  -1    0.11    1.17
   7  -1  -1    4.00    1.27
   7  -1  -1    1.04    1.28
   7  -1  -1    2.97    1.42
   7  -1  -1    1.12    1.29
   7  -1  -1   -0.25    1.38
  -7   1   1    0.33    1.24
  -7   1   1    0.86    1.53
  -7   1   1    2.47    1.56
  -7   1   1   -0.53    1.37
  -7   1   1    1.67    1.45
   6  -1  -1   70.38    2.79
   6  -1  -1   70.05    3.04
   6  -1  -1   73.02    2.88
   6  -1  -1   72.21    3.22
   6  -1  -1   73.51    2.95
   6  -1  -1   67.46    3.26
  -6   1   1   74.37    3.39
  -6   1   1   64.93    3.22
  -6   1   1   73.38    2.94
  -6   1   1   71.73    3.32
  -6   1   1   72.24    3.24
   5  -1  -1    6.14    1.20
   5  -1  -1    6.41    1.10
   5  -1  -1    8.16    1.44
   5  -1  -1    6.54    1.09
   5  -1  -1    5.47    1.35
   5  -1  -1    6.05    1.20
  -5   1   1    6.02    1.36
  -5   1   1    5.59    1.10
  -5   1   1    5.59    1.14
  -5   1   1    6.95    1.28
  -5   1   1    6.03    1.25
  -5   1   1    7.63    1.21
   4  -1  -1    2.16    0.79
   4  -1  -1   -0.06    1.02
   4  -1  -1    0.72    0.87
   4  -1  -1    1.03    0.87
   4  -1  -1    0.53    0.83
  -4   1   1    1.22    1.06
  -4   1   1    0.87    1.02
  -4   1   1    1.43    0.98
  -4   1   1    1.70    0.80
  -4   1   1    1.53    0.86
  -4   1   1   -0.18    1.04
   3  -1  -1   26.25    1.64
   3  -1  -1   25.31    1.45
   3  -1  -1   25.39    1.31
   3  -1  -1   25.32    1.32
   3  -1  -1   26.92    1.31
  -3   1   1   26.59    1.33
  -3   1   1   25.82    1.47
  -3   1   1   27.37    1.49
  -3   1   1   27.71    1.68
  -3   1   1   24.26    1.46
  -3   1   1   27.76    1.61
   2  -1  -1  327.39    6.65
   2  -1  -1  310.18    6.78
   2  -1  -1  328.79    6.87
   2  -1  -1  329.72    6.67
   2  -1  -1  331.88    7.06
  -2   1   1  326.08    6.66
  -2   1   1  317.09    6.78
  -2   1   1  316.55    7.06
  -2   1   1  332.36    7.16
  -2   1   1  304.51    6.88
  -2   1   1  318.92    6.98
   1  -1  -1  150.70    3.20
   1  -1  -1  154.57    3.17
   1  -1  -1  153.52    3.37
   1  -1  -1  157.79    3.51
   1  -1  -1  146.38    3.27
  -1   1   1  147.51    3.53
  -1   1   1  157.22    3.52
  -1   1   1  145.79    3.18
  -1   1   1  155.28    3.46
  -1   1   1  145.43    3.26
  -1   1   1  155.29    3.17
  -1   1   1  153.14    3.51
   0  -1  -1    6.31    0.49
   0  -1  -1    6.96    0.36
   0  -1  -1    7.05    0.54
   0  -1  -1    5.77    0.46
   0  -1  -1    6.58    0.45
   0  -1  -1    6.37    0.44
   0   1   1    6.37    0.36
   0   1   1    6.52    0.45
   0   1   1    5.95    0.53
   0   1   1    6.88    0.47
   0   1   1    5.44    0.39
   0   1   1    6.46    0.50
   0   1   1    5.60    0.39
   0   1   1    6.83    0.55
  -1  -1  -1   72.69    1.78
  -1  -1  -1   71.27    1.78
  -1  -1  -1   71.37    1.56
  -1  -1  -1   73.95    2.05
  -1  -1  -1   70.75    1.62
  -1  -1  -1   72.91    1.85
  -1  -1  -1   74.13    2.19
   1   1   1   70.80    1.61
   1   1   1   75.31    2.04
   1   1   1   72.24    1.56
   1   1   1   73.56    1.85
   1   1   1   72.16    2.18
  -2  -1  -1    2.00    0.57
  -2  -1  -1    1.63    0.64
  -2  -1  -1    2.16    0.75
  -2  -1  -1    1.51    0.67
  -2  -1  -1    1.90    0.88
  -2  -1  -1    1.64    1.04
  -2  -1  -1    2.38    0.75
  -2  -1  -1    1.65    0.52
   2   1   1    2.57    0.90
   2   1   1    1.43    0.83
   2   1   1   -0.97    1.00
   2   1   1    1.68    0.69
  -3  -1  -1   96.99    2.62
  -3  -1  -1   89.36    3.00
  -3  -1  -1   97.31    2.85
  -3  -1  -1   97.14    3.42
  -3  -1  -1   92.42    2.71
  -3  -1  -1   96.24    2.65
  -3  -1  -1   95.21    2.68
  -3  -1  -1   94.30    2.70
   3   1   1   93.85    3.10
   3   1   1   95.19    3.02
   3   1   1   94.14    3.37
   3   1   1   94.79    2.72
  -4  -1  -1   22.26    1.33
  -4  -1  -1   19.68    1.46
  -4  -1  -1   20.66    1.51
  -4  -1  -1   21.66    1.51
  -4  -1  -1   19.02    1.39
  -4  -1  -1   20.78    1.59
  -4  -1  -1   19.61    1.53
  -4  -1  -1   19.64    1.91
   4   1   1   16.75    1.49
   4   1   1   17.82    1.41
   4   1   1   19.53    1.82
   4   1   1   20.75    1.61
   4   1   1   18.54    1.66
  -5  -1  -1   12.73    1.39
  -5  -1  -1   11.49    1.38
  -5  -1  -1   16.51    1.67
  -5  -1  -1   13.27    1.51
  -5  -1  -1   13.99    1.53
  -5  -1  -1   14.73    2.05
  -5  -1  -1   12.23    1.59
  -5  -1  -1   15.27    1.56
   5   1   1   15.31    2.04
   5   1   1   14.06    1.70
   5   1   1   12.68    1.56
   5   1   1   12.80    1.64
   5   1   1   13.04    1.40
  -6  -1  -1   43.56    2.52
  -6  -1  -1   45.25    2.42
  -6  -1  -1   41.63    2.30
  -6  -1  -1   40.57    2.20
  -6  -1  -1   42.65    2.26
  -6  -1  -1   41.15    3.01
  -6  -1  -1   43.38    2.40
   6   1   1   42.53    2.49
   6   1   1   43.01    2.96
   6   1   1   38.83    2.32
   6   1   1   39.03    2.62
   6   1   1   42.63    2.23
  -7  -1  -1   -0.38    1.28
  -7  -1  -1    1.15    1.22
  -7  -1  -1    0.98    1.81
  -7  -1  -1    1.92    1.26
  -7  -1  -1    2.30    1.34
  -7  -1  -1   -0.14    1.08
  -7  -1  -1    0.66    1.25
   7   1   1    2.80    1.72
   7   1   1    0.52    1.33
   7   1   1    0.98    1.18
   7   1   1    0.08    1.11
   7   1   1   -1.11    1.13
  -8  -1  -1    7.46    1.76
  -8  -1  -1    7.97    1.91
  -8  -1  -1    9.66    1.94
  -8  -1  -1   11.63    2.00
  -8  -1  -1   10.15    1.97
  -8  -1  -1   10.86    1.76
   8   1   1   10.91    1.68
   8   1   1    9.07    1.76
   8   1   1    9.30    2.39
   8   1   1    8.23    1.97
   8   1   1    7.26    1.82
  -9  -1  -1    1.72    1.63
  -9  -1  -1    1.96    1.74
  -9  -1  -1    0.49    1.62
  -9  -1  -1    3.56    1.78
  -9  -1  -1    2.77    1.75
   9   1   1    1.40    1.82
   9   1   1    1.29    1.60
   9   1   1    1.83    1.76
   9   1   1    5.31    2.30
   9   1   1    1.32    1.68
   9   1   1    5.26    1.57
 -10  -1  -1    1.29    1.68
 -10  -1  -1   -0.81    1.72
 -10  -1  -1    2.47    1.75
 -10  -1  -1    1.53    1.93
  10   1   1    5.41    2.09
  10   1   1   -2.58    1.54
  10   1   1    2.19    1.93
 -11  -1  -1    0.14    2.02
 -11  -1  -1    2.75    1.97
 -11  -1  -1    1.93    2.02
  11   1   1    3.91    2.04
  11   1   1    3.79    2.00
  11   1   1    3.77    2.05
  10  -2  -1   -0.09    1.84
  10  -2  -1    0.12    1.89
 -10   2   1    1.48    2.01
 -10   2   1   -0.77    1.79
 -10   2   1    1.48    2.12
   9  -2  -1    0.22    1.69
   9  -2  -1   -2.31    1.90
   9  -2  -1    0.95    1.77
  -9   2   1    0.30    1.84
  -9   2   1    0.68    1.83
  -9   2   1    3.60    1.97
   8  -2  -1   -2.54    1.51
   8  -2  -1    2.17    1.71
   8  -2  -1   -1.07    1.57
  -8   2   1    1.64    1.62
  -8   2   1    0.22    1.65
  -8   2   1    1.52    1.86
  -8   2   1    1.26    1.71
   7  -2  -1   -2.28    1.27
   7  -2  -1    0.50    1.46
   7  -2  -1    1.47    1.52
  -7   2   1   -0.32    1.46
  -7   2   1    1.79    1.58
  -7   2   1    1.45    1.59
  -7   2   1    2.52    1.23
   6  -2  -1    2.98    1.37
   6  -2  -1    5.86    0.96
   6  -2  -1    4.29    1.28
   6  -2  -1    3.87    1.04
   6  -2  -1    4.05    1.37
   6  -2  -1    5.87    1.57
  -6   2   1    3.90    1.31
  -6   2   1    4.42    1.54
  -6   2   1    8.25    1.47
  -6   2   1    5.05    1.56
   5  -2  -1    5.77    1.32
   5  -2  -1    3.19    1.29
   5  -2  -1    8.52    1.22
   5  -2  -1    7.29    0.93
   5  -2  -1    6.98    1.01
   5  -2  -1    9.91    1.42
  -5   2   1    5.43    1.47
  -5   2   1    6.33    1.41
  -5   2   1    5.89    1.18
  -5   2   1    7.12    1.25
  -5   2   1    6.60    1.53
   4  -2  -1  153.00    3.68
   4  -2  -1  147.34    3.60
   4  -2  -1  146.19    4.48
   4  -2  -1  142.36    3.81
   4  -2  -1  147.61    4.26
   4  -2  -1  146.60    3.98
  -4   2   1  142.05    3.81
  -4   2   1  148.09    4.53
  -4   2   1  155.43    4.45
  -4   2   1  147.51    4.08
  -4   2   1  141.77    4.48
   3  -2  -1   32.25    1.73
   3  -2  -1   34.66    1.30
   3  -2  -1   34.03    1.18
   3  -2  -1   35.99    1.84
   3  -2  -1   34.45    1.27
   3  -2  -1   34.07    1.60
   3  -2  -1   33.68    1.20
  -3   2   1   36.59    2.01
  -3   2   1   33.68    1.60
  -3   2   1   33.07    1.70
  -3   2   1   33.32    1.32
  -3   2   1   34.23    1.78
   2  -2  -1    4.29    0.35
   2  -2  -1    4.13    0.81
   2  -2  -1    3.78    0.36
   2  -2  -1    5.54    0.93
   2  -2  -1    5.19    0.83
   2  -2  -1    3.91    0.42
  -2   2   1    4.15    0.39
  -2   2   1    5.45    0.96
  -2   2   1    3.98    1.06
  -2   2   1    4.34    0.80
  -2   2   1    4.37    0.87
   1  -2  -1   35.31    1.34
   1  -2  -1   34.50    1.48
   1  -2  -1   32.69    0.97
   1  -2  -1   34.41    0.91
   1  -2  -1   36.74    1.30
  -1   2   1   33.36    0.95
  -1   2   1   32.83    1.46
  -1   2   1   34.38    1.63
  -1   2   1   35.24    0.92
  -1   2   1   35.78    1.57
  -1   2   1   34.20    0.98
  -1   2   1   35.80    1.45
   0  -2  -1  254.35    5.55
   0  -2  -1  244.06    5.62
   0  -2  -1  254.78    5.45
   0  -2  -1  264.60    5.43
   0  -2  -1  254.99    5.36
   0  -2  -1  250.74    5.35
   0   2   1  257.82    5.30
   0   2   1  262.65    5.60
   0   2   1  254.30    5.40
   0   2   1  256.04    5.59
   0   2   1  243.93    5.57
   0   2   1  248.85    5.56
   0   2   1  262.88    5.42
  -1  -2  -1   64.62    2.13
  -1  -2  -1   64.83    2.16
  -1  -2  -1   66.34    2.34
  -1  -2  -1   65.76    1.87
  -1  -2  -1   61.47    1.78
  -1  -2  -1   63.15    1.69
   1   2   1   65.17    2.01
   1   2   1   67.41    1.86
   1   2   1   66.60    1.91
   1   2   1   60.63    2.40
   1   2   1   62.73    2.18
   1   2   1   63.40    2.14
  -2  -2  -1  148.04    3.09
  -2  -2  -1  147.71    3.53
  -2  -2  -1  151.29    4.00
  -2  -2  -1  144.71    3.35
  -2  -2  -1  145.40    4.25
  -2  -2  -1  143.90    3.64
   2   2   1  146.69    3.69
   2   2   1  143.14    4.33
   2   2   1  147.16    3.47
   2   2   1  143.22    3.08
   2   2   1  149.12    4.03
  -3  -2  -1  394.65    8.79
  -3  -2  -1  379.00    9.13
  -3  -2  -1  387.92    8.37
  -3  -2  -1  358.42    8.70
  -3  -2  -1  384.83    7.88
  -3  -2  -1  374.10    8.06
  -3  -2  -1  379.23    8.38
  -3  -2  -1  383.06    8.21
  -3  -2  -1  365.87    8.01
   3   2   1  375.59    8.37
   3   2   1  377.27    8.75
   3   2   1  379.04    9.23
   3   2   1  397.89    8.83
   3   2   1  377.49    8.10
  -4  -2  -1   31.05    1.70
  -4  -2  -1   32.51    2.38
  -4  -2  -1   28.78    1.60
  -4  -2  -1   28.76    1.75
  -4  -2  -1   30.15    1.53
  -4  -2  -1   33.34    2.15
  -4  -2  -1   30.09    1.80
  -4  -2  -1   32.50    1.69
   4   2   1   29.33    2.35
   4   2   1   27.47    1.98
   4   2   1   28.22    1.74
   4   2   1   30.22    1.66
   4   2   1   30.04    2.12
  -5  -2  -1   72.88    2.65
  -5  -2  -1   79.76    2.96
  -5  -2  -1   74.31    3.62
  -5  -2  -1   75.69    2.93
  -5  -2  -1   76.96    2.78
  -5  -2  -1   75.48    2.70
  -5  -2  -1   73.04    2.60
   5   2   1   71.18    3.58
   5   2   1   76.08    2.72
   5   2   1   72.58    3.25
   5   2   1   72.81    2.91
   5   2   1   67.67    3.12
  -6  -2  -1    7.62    1.44
  -6  -2  -1    8.40    1.31
  -6  -2  -1    8.81    1.39
  -6  -2  -1    9.39    2.11
  -6  -2  -1    6.76    1.28
  -6  -2  -1    7.27    1.47
  -6  -2  -1    6.40    1.35
   6   2   1    6.99    1.84
   6   2   1    6.48    1.43
   6   2   1   11.50    1.59
   6   2   1    8.82    1.47
   6   2   1    7.37    1.62
  -7  -2  -1    9.43    1.58
  -7  -2  -1    9.32    1.59
  -7  -2  -1    8.15    2.26
  -7  -2  -1    8.91    1.66
  -7  -2  -1    8.53    1.71
  -7  -2  -1    8.15    1.71
  -7  -2  -1    8.87    1.57
   7   2   1    8.00    1.71
   7   2   1    7.76    1.78
   7   2   1    8.95    1.71
   7   2   1    8.71    1.65
   7   2   1    7.77    2.10
  -8  -2  -1   -2.72    1.31
  -8  -2  -1   -0.52    1.92
  -8  -2  -1    0.94    1.27
  -8  -2  -1    0.16    1.47
  -8  -2  -1    1.40    1.45
  -8  -2  -1   -1.70    1.26
  -8  -2  -1   -0.37    1.26
   8   2   1    1.16    1.75
   8   2   1   -0.94    1.21
   8   2   1    1.93    1.46
   8   2   1    0.49    1.52
   8   2   1   -1.51    1.29
   8   2   1    0.91    1.31
  -9  -2  -1   14.37    2.49
  -9  -2  -1   18.26    3.37
  -9  -2  -1   12.90    2.21
  -9  -2  -1   16.18    2.30
  -9  -2  -1   13.16    2.26
  -9  -2  -1   14.15    2.22
  -9  -2  -1   14.66    2.40
   9   2   1   12.35    2.35
   9   2   1   16.00    2.99
   9   2   1   14.18    2.20
   9   2   1   14.09    2.21
   9   2   1   17.53    2.38
   9   2   1   12.53    2.37
 -10  -2  -1    4.67    2.01
 -10  -2  -1    2.95    1.76
 -10  -2  -1    6.62    2.11
 -10  -2  -1    3.36    1.97
 -10  -2  -1    4.91    2.14
  10   2   1    3.99    2.27
  10   2   1    7.34    1.89
  10   2   1    5.20    1.83
  10   2   1    6.96    2.44
  10   2   1    2.17    1.69
  10   2   1    5.56    1.90
 -11  -2  -1    5.14    2.23
 -11  -2  -1    1.20    1.67
 -11  -2  -1   -0.14    1.99
  11   2   1   -0.78    1.77
  11   2   1    3.79    2.15
  11   2   1    0.82    1.85
  10  -3  -1   -0.90    1.92
  10  -3  -1    2.30    2.10
 -10   3   1    2.82    2.08
 -10   3   1   -0.75    2.03
 -10   3   1    1.63    2.21
   9  -3  -1    3.54    1.69
   9  -3  -1    3.10    2.04
  -9   3   1    0.77    1.94
  -9   3   1    0.70    1.52
  -9   3   1   -0.26    1.76
   8  -3  -1   -1.39    1.53
   8  -3  -1   -2.14    1.65
   8  -3  -1   -0.22    1.64
  -8   3   1    2.05    1.93
  -8   3   1    1.43    1.74
  -8   3   1   -1.00    1.63
   7  -3  -1    1.27    1.30
   7  -3  -1   -0.64    1.46
   7  -3  -1    1.75    1.57
  -7   3   1    0.76    1.64
  -7   3   1    1.59    1.34
  -7   3   1   -1.01    1.52
  -7   3   1    0.18    1.19
   6  -3  -1   -0.88    1.29
   6  -3  -1   -1.43    1.34
   6  -3  -1   -1.17    1.25
  -6   3   1    1.44    1.49
  -6   3   1   -0.11    1.38
  -6   3   1    1.40    1.05
  -6   3   1    1.93    1.54
   5  -3  -1   22.18    1.95
   5  -3  -1   23.12    1.28
   5  -3  -1   25.96    1.10
   5  -3  -1   26.84    2.03
   5  -3  -1   21.70    1.18
   5  -3  -1   21.02    1.88
  -5   3   1   22.98    2.16
  -5   3   1   24.86    2.42
  -5   3   1   23.22    1.90
  -5   3   1   22.40    1.66
   4  -3  -1   10.39    0.66
   4  -3  -1   14.52    0.60
   4  -3  -1   14.43    1.61
   4  -3  -1   13.33    1.44
   4  -3  -1   11.62    0.64
   4  -3  -1   14.06    1.62
   4  -3  -1   13.35    0.62
  -4   3   1   14.08    1.84
  -4   3   1   14.44    1.43
  -4   3   1   13.16    1.77
  -4   3   1   13.55    1.54
   3  -3  -1   23.70    1.79
   3  -3  -1   27.66    1.89
   3  -3  -1   26.12    1.66
  -3   3   1   24.11    1.59
  -3   3   1   25.40    1.90
  -3   3   1   24.79    1.80
  -3   3   1   21.21    1.87
   2  -3  -1  110.91    3.34
   2  -3  -1  110.39    3.27
   2  -3  -1  109.06    3.01
  -2   3   1  109.37    3.19
  -2   3   1  108.48    3.49
  -2   3   1  109.13    3.29
  -2   3   1  106.75    3.25
   1  -3  -1   28.43    1.56
   1  -3  -1   27.81    1.33
   1  -3  -1   26.83    1.46
  -1   3   1   26.66    1.46
  -1   3   1   27.57    1.05
  -1   3   1   26.15    1.72
  -1   3   1   26.55    1.07
  -1   3   1   28.64    0.99
  -1   3   1   27.00    0.95
  -1   3   1   26.78    1.50
   0  -3  -1    1.38    0.81
   0  -3  -1    0.91    0.58
   0  -3  -1    0.92    0.64
   0  -3  -1    1.39    0.75
   0  -3  -1    1.48    0.73
   0  -3  -1    0.04    0.59
   0   3   1    2.79    0.98
   0   3   1    0.23    0.69
   0   3   1    1.12    0.68
   0   3   1    0.11    0.86
   0   3   1    1.88    1.01
   0   3   1    0.41    0.66
  -1  -3  -1    5.75    0.86
  -1  -3  -1    5.55    0.93
  -1  -3  -1    4.74    0.95
  -1  -3  -1    7.29    0.69
  -1  -3  -1    5.30    0.57
  -1  -3  -1    6.06    1.22
  -1  -3  -1    5.66    1.01
   1   3   1    7.57    1.04
   1   3   1    9.43    1.19
   1   3   1    5.40    0.54
   1   3   1    3.53    1.20
   1   3   1    4.09    0.98
   1   3   1    4.76    0.97
  -2  -3  -1    0.80    0.28
  -2  -3  -1    0.76    0.95
  -2  -3  -1   -0.18    1.16
  -2  -3  -1    0.96    0.65
  -2  -3  -1    0.91    0.51
  -2  -3  -1   -0.22    0.65
  -2  -3  -1   -1.17    0.84
   2   3   1    1.46    0.34
   2   3   1    2.09    1.07
   2   3   1    0.36    0.85
   2   3   1    1.64    0.86
   2   3   1    1.47    0.83
  -3  -3  -1    8.47    1.01
  -3  -3  -1    9.33    1.76
  -3  -3  -1    9.82    0.88
  -3  -3  -1    9.52    1.27
  -3  -3  -1    8.36    1.47
   3   3   1    9.12    0.70
   3   3   1   10.70    1.26
   3   3   1    9.18    1.39
   3   3   1    8.07    1.84
   3   3   1   10.03    1.51
  -4  -3  -1   18.49    1.75
  -4  -3  -1   19.61    2.39
  -4  -3  -1   20.79    1.68
  -4  -3  -1   22.14    2.11
  -4  -3  -1   17.55    1.59
  -4  -3  -1   18.03    1.18
  -4  -3  -1   17.50    1.07
  -4  -3  -1   17.05    1.42
   4   3   1   15.53    2.37
   4   3   1   16.22    1.08
   4   3   1   18.91    1.85
   4   3   1   19.31    2.07
   4   3   1   15.06    1.57
   4   3   1   17.69    1.40
  -5  -3  -1    3.00    1.02
  -5  -3  -1    4.41    1.12
  -5  -3  -1    4.16    1.79
  -5  -3  -1    4.41    1.01
  -5  -3  -1    4.57    1.31
  -5  -3  -1    4.34    1.26
  -5  -3  -1    4.83    1.50
  -5  -3  -1    4.28    0.91
   5   3   1    3.04    1.44
   5   3   1    2.84    1.70
   5   3   1    5.00    1.12
   5   3   1    2.33    1.20
   5   3   1    4.72    0.93
  -6  -3  -1    9.13    1.88
  -6  -3  -1   12.94    2.47
  -6  -3  -1   10.91    1.38
  -6  -3  -1   10.40    1.35
  -6  -3  -1   11.13    1.53
  -6  -3  -1    9.06    1.37
  -6  -3  -1   10.26    1.64
  -6  -3  -1   12.79    1.80
   6   3   1   13.22    1.41
   6   3   1   12.65    1.79
   6   3   1    9.07    1.91
   6   3   1   11.43    1.53
   6   3   1   13.81    2.43
  -7  -3  -1    0.93    1.08
  -7  -3  -1   -0.76    1.23
  -7  -3  -1    0.31    1.01
  -7  -3  -1   -0.90    1.86
  -7  -3  -1   -0.73    1.10
  -7  -3  -1   -1.03    1.12
  -7  -3  -1    1.61    1.58
   7   3   1    1.16    1.04
   7   3   1    0.72    1.23
   7   3   1    0.02    1.43
   7   3   1    1.47    1.69
   7   3   1    0.67    1.25
  -8  -3  -1   -1.58    1.38
  -8  -3  -1   -0.75    1.40
  -8  -3  -1    1.55    1.29
  -8  -3  -1    2.39    2.28
  -8  -3  -1   -0.04    1.12
  -8  -3  -1   -2.19    1.11
  -8  -3  -1   -1.10    1.29
   8   3   1    0.11    1.46
   8   3   1    0.07    1.57
   8   3   1    1.67    1.43
   8   3   1   -1.53    1.64
   8   3   1    0.00    1.18
   8   3   1    2.86    1.18
  -9  -3  -1    1.89    1.64
  -9  -3  -1    1.97    1.74
  -9  -3  -1    3.03    2.02
  -9  -3  -1    3.76    2.68
  -9  -3  -1    3.70    1.49
  -9  -3  -1    3.16    1.55
  -9  -3  -1    2.36    1.69
   9   3   1    2.31    1.58
   9   3   1    6.64    1.66
   9   3   1    0.13    1.77
   9   3   1    4.57    1.51
   9   3   1    3.14    1.65
   9   3   1    3.92    1.85
   9   3   1    4.38    2.34
 -10  -3  -1    2.05    1.63
 -10  -3  -1    0.42    1.80
 -10  -3  -1    2.74    1.61
 -10  -3  -1    1.83    2.09
 -10  -3  -1    3.26    1.91
 -10  -3  -1   -0.86    2.67
 -10  -3  -1    4.08    2.24
  10   3   1    5.51    1.81
  10   3   1    6.96    1.68
  10   3   1    6.83    2.39
  10   3   1    4.12    1.80
  10   3   1    2.14    1.99
  10   3   1    6.87    1.94
  10   3   1    5.46    1.98
  10   3   1    1.62    1.58
 -11  -3  -1    1.58    1.79
 -11  -3  -1   -1.21    2.11
 -11  -3  -1    1.04    1.87
  11   3   1   -0.65    1.51
  11   3   1    3.69    1.78
  11   3   1   -0.84    1.83
  11   3   1    4.29    1.92
   9  -4  -1    2.60    2.02
   9  -4  -1    0.78    1.92
  -9   4   1    4.97    2.29
  -9   4   1    0.09    2.07
  -9   4   1    0.18    1.84
   8  -4  -1    5.30    2.06
   8  -4  -1    2.18    1.76
  -8   4   1    3.00    1.97
  -8   4   1    3.58    2.06
  -8   4   1   -0.67    1.85
   7  -4  -1    0.85    1.72
   7  -4  -1   -3.15    1.46
   7  -4  -1    3.52    1.84
  -7   4   1    2.47    1.50
  -7   4   1    2.04    1.89
  -7   4   1    2.87    1.87
   6  -4  -1    7.10    1.65
   6  -4  -1    6.19    1.72
   6  -4  -1    8.13    1.73
  -6   4   1    9.58    1.54
  -6   4   1    7.92    1.71
  -6   4   1    8.56    2.04
  -6   4   1    6.76    2.06
   5  -4  -1   37.81    2.73
   5  -4  -1   38.10    2.42
   5  -4  -1   38.56    2.62
  -5   4   1   40.62    2.81
  -5   4   1   43.09    2.86
  -5   4   1   39.05    2.67
  -5   4   1   38.38    2.15
   4  -4  -1    4.04    1.33
   4  -4  -1    3.31    1.25
   4  -4  -1    3.55    1.12
  -4   4   1    3.54    1.11
  -4   4   1    4.14    1.29
  -4   4   1    4.29    1.46
  -4   4   1    1.76    1.41
   3  -4  -1    2.12    1.10
   3  -4  -1    2.09    1.11
   3  -4  -1    2.01    1.10
  -3   4   1   -0.22    0.96
  -3   4   1    0.24    1.00
  -3   4   1    1.92    1.06
  -3   4   1    1.54    0.95
   2  -4  -1   16.41    1.50
   2  -4  -1   15.85    1.56
   2  -4  -1   15.51    1.56
  -2   4   1   16.37    1.69
  -2   4   1   15.81    1.92
  -2   4   1   15.89    1.50
  -2   4   1   17.96    1.69
   1  -4  -1  116.54    3.37
   1  -4  -1  113.74    3.30
   1  -4  -1  111.71    3.29
   1  -4  -1  111.73    2.98
  -1   4   1  114.15    2.84
  -1   4   1  119.72    3.47
  -1   4   1  112.18    3.00
  -1   4   1  109.18    2.77
  -1   4   1  112.79    3.35
  -1   4   1  113.60    3.72
   0  -4  -1   11.05    1.18
   0  -4  -1   11.70    1.15
   0  -4  -1   12.28    1.24
   0  -4  -1   12.67    1.10
   0  -4  -1   10.92    1.28
   0   4   1   11.22    1.08
   0   4   1   11.09    1.15
   0   4   1   11.34    1.40
   0   4   1   10.77    1.08
   0   4   1   12.24    1.47
   0   4   1   12.28    1.57
  -1  -4  -1  324.89    7.93
  -1  -4  -1  310.29    7.28
  -1  -4  -1  325.94    6.86
  -1  -4  -1  333.16    7.30
  -1  -4  -1  324.29    7.54
   1   4   1  339.70    7.58
   1   4   1  324.19    7.52
   1   4   1  321.97    6.81
   1   4   1  325.09    7.52
   1   4   1  309.19    7.44
  -2  -4  -1  103.71    3.58
  -2  -4  -1  107.97    3.30
  -2  -4  -1  103.62    3.93
  -2  -4  -1  114.60    2.99
  -2  -4  -1  108.55    2.66
  -2  -4  -1  107.54    3.12
   2   4   1  104.36    2.48
   2   4   1  107.52    3.31
   2   4   1  108.75    3.55
   2   4   1  112.99    3.69
  -3  -4  -1    5.85    1.03
  -3  -4  -1    4.80    1.15
  -3  -4  -1    5.34    0.71
  -3  -4  -1    6.10    1.74
  -3  -4  -1    5.34    1.39
   3   4   1    7.74    1.32
   3   4   1    5.36    0.73
   3   4   1    7.01    0.64
   3   4   1    5.58    1.46
   3   4   1    5.32    1.30
   3   4   1    7.08    1.47
  -4  -4  -1   17.50    2.10
  -4  -4  -1   17.79    2.53
  -4  -4  -1   16.16    1.44
  -4  -4  -1   17.78    1.73
  -4  -4  -1   17.12    1.19
   4   4   1   18.60    1.74
   4   4   1   18.17    2.14
   4   4   1   16.63    2.62
   4   4   1   14.47    0.98
   4   4   1   19.95    2.07
  -5  -4  -1   39.22    2.31
  -5  -4  -1   39.21    2.82
  -5  -4  -1   37.55    1.75
  -5  -4  -1   38.97    2.09
  -5  -4  -1   40.37    3.14
   5   4   1   39.40    2.44
   5   4   1   34.83    3.09
   5   4   1   38.59    2.84
   5   4   1   41.07    2.13
   5   4   1   38.53    1.64
  -6  -4  -1    0.61    1.48
  -6  -4  -1   -0.73    1.33
  -6  -4  -1    1.30    0.84
  -6  -4  -1    0.78    0.90
  -6  -4  -1   -0.09    1.22
  -6  -4  -1   -0.33    0.98
  -6  -4  -1   -0.52    1.25
   6   4   1    0.36    1.64
   6   4   1    0.31    1.05
   6   4   1    1.16    1.31
   6   4   1    1.34    1.45
   6   4   1    0.44    0.81
  -7  -4  -1    4.39    1.55
  -7  -4  -1    0.65    0.98
  -7  -4  -1    2.69    1.65
  -7  -4  -1    1.65    1.21
  -7  -4  -1    0.99    1.03
  -7  -4  -1    0.79    1.50
  -7  -4  -1    2.75    2.19
   7   4   1    1.61    1.53
   7   4   1    2.45    1.72
   7   4   1    4.64    1.12
   7   4   1    3.02    2.00
   7   4   1    2.48    1.26
  -8  -4  -1    3.86    1.35
  -8  -4  -1    5.21    1.80
  -8  -4  -1    2.01    1.39
  -8  -4  -1    2.45    1.37
  -8  -4  -1    2.91    2.57
  -8  -4  -1    3.78    1.90
   8   4   1    1.36    1.62
   8   4   1    5.18    2.34
   8   4   1    3.99    1.38
   8   4   1    2.59    1.92
   8   4   1    4.11    1.66
  -9  -4  -1    0.40    1.34
  -9  -4  -1    2.59    2.81
  -9  -4  -1    3.65    1.56
  -9  -4  -1   -0.20    1.68
  -9  -4  -1    2.41    1.57
   9   4   1    4.20    1.53
   9   4   1    3.41    1.64
   9   4   1    3.85    2.09
   9   4   1    1.46    2.05
   9   4   1    5.39    1.81
   9   4   1    4.23    2.35
 -10  -4  -1    0.71    2.95
 -10  -4  -1    0.98    1.85
 -10  -4  -1    2.03    1.90
 -10  -4  -1    2.13    1.77
  10   4   1    2.89    1.74
  10   4   1    1.88    2.09
  10   4   1    1.94    1.70
  10   4   1    6.17    2.43
  10   4   1    3.93    1.98
  10   4   1    4.15    1.72
 -11  -4  -1   -1.90    1.84
 -11  -4  -1   -1.03    3.04
 -11  -4  -1   -1.13    1.68
 -11  -4  -1    1.43    1.73
  11   4   1    7.16    2.56
  11   4   1    0.18    1.96
  11   4   1    0.60    1.59
  11   4   1    3.59    1.78
  11   4   1    1.92    1.64
   9  -5  -1    3.36    2.16
   9  -5  -1   -0.74    1.90
  -9   5   1    1.42    2.08
  -9   5   1   -3.22    2.06
  -9   5   1    1.75    2.08
   8  -5  -1   -0.16    1.73
   8  -5  -1   -1.84    1.75
  -8   5   1   -0.94    1.88
  -8   5   1   -1.52    1.66
  -8   5   1   -0.04    1.79
   7  -5  -1    0.60    1.70
   7  -5  -1   -0.95    1.69
   7  -5  -1   -3.19    1.07
  -7   5   1    0.13    1.67
  -7   5   1   -1.99    1.69
  -7   5   1    3.01    1.92
   6  -5  -1    4.39    1.78
   6  -5  -1    2.36    1.78
   6  -5  -1    1.22    1.73
  -6   5   1    1.93    1.75
  -6   5   1    1.41    1.73
  -6   5   1    2.31    1.88
   5  -5  -1    2.36    1.61
   5  -5  -1    4.46    1.64
   5  -5  -1    5.46    1.66
  -5   5   1    5.04    1.79
  -5   5   1    4.83    1.70
  -5   5   1    7.69    2.06
  -5   5   1    8.70    1.48
   4  -5  -1    7.73    1.57
   4  -5  -1    6.25    1.61
   4  -5  -1    6.20    1.41
  -4   5   1    6.80    1.71
  -4   5   1    5.72    1.33
  -4   5   1    5.64    1.80
  -4   5   1    4.95    1.53
   3  -5  -1   10.64    1.56
   3  -5  -1    8.03    1.50
   3  -5  -1    9.66    1.55
  -3   5   1    9.23    1.43
  -3   5   1    8.09    1.49
  -3   5   1    7.74    1.58
  -3   5   1    6.94    1.56
   2  -5  -1   13.45    1.57
   2  -5  -1   15.00    1.61
   2  -5  -1   10.99    1.55
  -2   5   1   10.10    0.63
  -2   5   1   10.92    0.59
  -2   5   1   12.91    1.62
  -2   5   1   10.15    1.42
  -2   5   1   10.67    0.57
  -2   5   1   10.76    1.57
  -2   5   1   12.17    1.71
  -2   5   1   12.25    0.68
   1  -5  -1   16.56    1.65
   1  -5  -1   17.84    1.34
   1  -5  -1   16.51    1.51
   1  -5  -1   17.57    1.61
  -1   5   1   15.37    1.20
  -1   5   1   16.96    2.05
  -1   5   1   16.13    1.29
  -1   5   1   20.02    1.88
  -1   5   1   20.01    1.80
  -1   5   1   16.51    1.10
   0  -5  -1   -0.06    0.89
   0  -5  -1   -0.26    0.67
   0  -5  -1    0.58    0.96
   0  -5  -1    0.46    1.00
   0  -5  -1    0.80    0.83
   0   5   1   -1.39    0.78
   0   5   1   -2.54    0.98
   0   5   1    0.10    1.03
   0   5   1   -2.01    0.70
   0   5   1    0.20    0.72
   0   5   1    3.38    1.28
  -1  -5  -1   75.08    2.93
  -1  -5  -1   72.77    2.68
  -1  -5  -1   72.80    3.21
  -1  -5  -1   70.03    2.67
  -1  -5  -1   72.61    2.21
   1   5   1   74.85    2.27
   1   5   1   74.03    2.93
   1   5   1   66.43    2.93
   1   5   1   68.58    2.96
   1   5   1   69.37    2.74
  -2  -5  -1   49.66    1.70
  -2  -5  -1   48.83    2.57
  -2  -5  -1   49.35    2.32
  -2  -5  -1   52.78    2.25
  -2  -5  -1   49.53    2.90
   2   5   1   47.78    2.38
   2   5   1   50.58    2.51
   2   5   1   46.30    2.46
   2   5   1   48.47    1.59
   2   5   1   49.33    2.63
  -3  -5  -1   61.36    2.66
  -3  -5  -1   63.41    3.10
  -3  -5  -1   59.87    1.83
  -3  -5  -1   65.48    2.52
  -3  -5  -1   60.99    3.42
   3   5   1   61.46    2.99
   3   5   1   62.45    2.76
   3   5   1   62.61    2.94
   3   5   1   60.13    1.75
  -4  -5  -1  106.64    4.31
  -4  -5  -1  113.00    3.55
  -4  -5  -1  110.72    4.83
  -4  -5  -1  108.86    2.86
  -4  -5  -1  108.67    3.80
   4   5   1  111.10    4.09
   4   5   1  110.83    4.41
   4   5   1  106.61    2.72
   4   5   1  112.93    3.79
  -5  -5  -1    5.85    1.17
  -5  -5  -1    6.51    1.47
  -5  -5  -1    4.41    0.79
  -5  -5  -1    3.87    1.65
  -5  -5  -1    3.51    1.91
   5   5   1    3.60    0.75
   5   5   1    3.37    1.52
   5   5   1    4.97    1.78
   5   5   1    2.95    1.92
   5   5   1    5.64    1.47
  -6  -5  -1   48.81    3.38
  -6  -5  -1   45.67    2.04
  -6  -5  -1   43.81    2.47
  -6  -5  -1   56.41    3.98
  -6  -5  -1   48.24    2.83
   6   5   1   45.53    2.98
   6   5   1   47.83    2.63
   6   5   1   50.22    3.44
   6   5   1   46.68    3.73
   6   5   1   46.06    1.93
  -7  -5  -1    1.91    1.26
  -7  -5  -1    1.28    1.77
  -7  -5  -1    0.62    1.42
  -7  -5  -1    1.22    2.17
  -7  -5  -1   -0.27    0.87
   7   5   1    2.82    1.90
   7   5   1    2.56    2.08
   7   5   1   -1.05    0.87
   7   5   1   -0.02    1.29
   7   5   1    0.29    1.23
  -8  -5  -1    6.74    1.70
  -8  -5  -1    7.06    3.00
  -8  -5  -1   11.45    1.61
  -8  -5  -1    8.29    2.04
   8   5   1    9.87    1.52
   8   5   1    9.13    2.79
   8   5   1   12.03    2.36
   8   5   1   10.75    2.10
   8   5   1    8.29    2.44
  -9  -5  -1    3.75    1.39
  -9  -5  -1    5.41    2.05
  -9  -5  -1    7.46    1.82
  -9  -5  -1    5.04    3.12
   9   5   1    4.50    2.25
   9   5   1    9.25    2.90
   9   5   1    4.95    1.77
   9   5   1    3.91    2.30
 -10  -5  -1    2.00    1.96
 -10  -5  -1    1.55    1.71
 -10  -5  -1    4.39    3.40
  10   5   1    5.83    2.92
  10   5   1    8.36    2.81
  10   5   1    5.96    2.26
  10   5   1    1.18    2.05
  10   5   1    5.72    1.94
 -11  -5  -1    1.16    2.33
 -11  -5  -1   -0.39    1.91
 -11  -5  -1    3.33    3.65
  11   5   1    7.35    2.67
  11   5   1    5.82    1.99
  11   5   1    1.30    2.03
   8  -6  -1    0.01    1.90
   8  -6  -1   -0.89    1.93
  -8   6   1    0.79    2.13
  -8   6   1    0.69    2.00
  -8   6   1    1.27    2.16
   7  -6  -1   -1.17    1.67
   7  -6  -1   -0.70    1.76
  -7   6   1    1.66    1.94
  -7   6   1   -0.34    1.89
  -7   6   1    1.86    2.00
   6  -6  -1   -0.70    1.68
   6  -6  -1   -2.15    1.51
   6  -6  -1    1.20    1.77
  -6   6   1    0.60    1.79
  -6   6   1    2.56    1.97
  -6   6   1    2.67    1.88
   5  -6  -1   26.68    2.54
   5  -6  -1   21.00    2.65
   5  -6  -1   21.31    2.57
  -5   6   1   19.95    2.66
  -5   6   1   21.44    2.60
  -5   6   1   23.28    2.78
   4  -6  -1    9.04    1.89
   4  -6  -1    9.27    1.84
   4  -6  -1   12.79    1.95
  -4   6   1    8.65    1.81
  -4   6   1   11.87    1.77
  -4   6   1    9.93    2.01
  -4   6   1   11.86    2.16
   3  -6  -1    3.58    1.37
   3  -6  -1    2.27    1.37
   3  -6  -1    3.35    1.22
  -3   6   1    3.67    1.48
  -3   6   1    4.91    1.44
  -3   6   1    1.81    1.68
  -3   6   1    5.39    1.53
   2  -6  -1   26.05    2.26
   2  -6  -1   27.14    2.08
   2  -6  -1   25.92    1.99
  -2   6   1   27.97    2.14
  -2   6   1   25.09    1.17
  -2   6   1   25.05    1.08
  -2   6   1   31.14    2.59
  -2   6   1   24.32    1.07
  -2   6   1   30.28    2.36
   1  -6  -1    1.69    0.95
   1  -6  -1    1.67    1.17
   1  -6  -1   -0.61    1.04
   1  -6  -1   -0.29    0.93
  -1   6   1    1.64    1.05
  -1   6   1    2.65    0.69
  -1   6   1    1.64    1.51
  -1   6   1    2.94    0.96
  -1   6   1    1.20    1.47
  -1   6   1    1.31    0.78
   0  -6  -1   73.03    2.62
   0  -6  -1   73.82    2.77
   0  -6  -1   77.20    2.94
   0  -6  -1   75.24    3.08
   0  -6  -1   72.83    2.99
   0   6   1   76.63    3.13
   0   6   1   70.92    3.14
   0   6   1   70.92    2.75
   0   6   1   75.88    3.37
   0   6   1   76.83    2.85
   0   6   1   72.67    2.69
  -1  -6  -1    1.40    1.37
  -1  -6  -1    0.95    0.99
  -1  -6  -1    0.41    1.01
  -1  -6  -1    1.74    0.75
  -1  -6  -1    1.70    1.11
   1   6   1   -0.67    1.31
   1   6   1    1.76    0.82
   1   6   1    1.74    1.15
   1   6   1    1.85    0.92
   1   6   1    1.44    1.46
  -2  -6  -1   41.40    2.21
  -2  -6  -1   39.82    2.61
  -2  -6  -1   38.72    2.91
  -2  -6  -1   39.79    1.59
  -2  -6  -1   40.29    2.26
   2   6   1   33.29    2.46
   2   6   1   40.79    2.56
   2   6   1   39.19    1.61
   2   6   1   36.19    2.28
   2   6   1   39.43    2.47
  -3  -6  -1    5.21    0.70
  -3  -6  -1    5.22    1.85
  -3  -6  -1    3.93    1.26
  -3  -6  -1    5.68    1.54
  -3  -6  -1    4.02    1.10
   3   6   1    6.30    1.64
   3   6   1    4.06    1.50
   3   6   1    5.26    1.61
   3   6   1    6.08    0.75
  -4  -6  -1    3.80    1.56
  -4  -6  -1    3.52    1.11
  -4  -6  -1    4.25    1.95
  -4  -6  -1    3.43    1.26
  -4  -6  -1    3.45    0.62
   4   6   1    3.13    1.47
   4   6   1    3.02    1.32
   4   6   1    3.08    0.65
   4   6   1    3.87    1.63
  -5  -6  -1   24.06    3.30
  -5  -6  -1   26.75    1.34
  -5  -6  -1   24.26    2.75
  -5  -6  -1   30.06    2.04
  -5  -6  -1   26.12    2.25
   5   6   1   29.19    2.56
   5   6   1   23.69    1.32
   5   6   1   30.02    3.23
   5   6   1   30.32    2.89
   5   6   1   28.36    2.51
  -6  -6  -1    2.76    2.11
  -6  -6  -1    1.98    1.78
  -6  -6  -1    1.34    1.39
  -6  -6  -1    0.42    0.71
  -6  -6  -1    2.08    1.19
   6   6   1    0.01    1.69
   6   6   1    2.83    2.10
   6   6   1    0.78    0.78
   6   6   1    3.08    1.78
   6   6   1    0.60    1.46
  -7  -6  -1    2.24    1.00
  -7  -6  -1    3.35    1.42
  -7  -6  -1    2.45    1.61
  -7  -6  -1    4.35    2.06
  -7  -6  -1    1.45    2.33
   7   6   1    4.12    2.08
   7   6   1    1.88    1.63
   7   6   1    2.63    2.25
   7   6   1    1.50    1.88
  -8  -6  -1   15.84    2.49
  -8  -6  -1   15.25    3.57
  -8  -6  -1   14.63    2.11
  -8  -6  -1   14.86    2.88
   8   6   1   14.85    2.88
   8   6   1   15.29    2.39
   8   6   1   13.06    2.33
   8   6   1   16.29    3.37
  -9  -6  -1    1.63    1.82
  -9  -6  -1    0.52    2.90
  -9  -6  -1    0.54    1.47
   9   6   1    0.03    2.16
   9   6   1    2.11    2.49
   9   6   1   -1.65    1.73
   9   6   1    0.26    1.82
 -10  -6  -1    0.10    1.98
 -10  -6  -1   -0.74    3.11
 -10  -6  -1    4.86    1.85
  10   6   1    4.47    2.28
  10   6   1    6.81    2.71
 -11  -6  -1   -0.65    1.90
 -11  -6  -1   -0.54    2.13
 -11  -6  -1   -0.20    3.61
  11   6   1    5.54    2.77
  11   6   1    4.34    1.84
  11   6   1    3.76    2.44
   7  -7  -1    1.34    2.00
   7  -7  -1    1.85    2.03
  -7   7   1    0.80    2.00
  -7   7   1    3.11    2.19
   6  -7  -1    0.12    1.75
   6  -7  -1   -1.23    1.69
   6  -7  -1    0.33    1.64
  -6   7   1    1.04    1.88
  -6   7   1    0.05    2.01
   5  -7  -1    9.06    2.19
   5  -7  -1    5.83    1.88
   5  -7  -1    6.35    2.06
  -5   7   1    7.81    2.14
  -5   7   1    9.46    2.19
   4  -7  -1    1.99    1.59
   4  -7  -1    3.48    1.74
   4  -7  -1    3.16    1.63
  -4   7   1    3.29    1.58
  -4   7   1    0.85    1.66
  -4   7   1    4.80    2.12
   3  -7  -1    3.05    1.43
   3  -7  -1    1.42    1.54
   3  -7  -1   -2.02    1.39
  -3   7   1   -0.17    1.78
  -3   7   1    1.84    1.68
  -3   7   1    0.64    1.47
   2  -7  -1    0.38    1.35
   2  -7  -1    0.40    1.28
   2  -7  -1   -1.91    1.13
  -2   7   1    0.23    1.20
  -2   7   1    0.27    1.30
  -2   7   1   -0.83    1.36
   1  -7  -1    8.31    1.47
   1  -7  -1    5.52    1.31
   1  -7  -1    4.48    1.34
   1  -7  -1    6.33    1.45
  -1   7   1    6.36    1.42
  -1   7   1    6.84    0.96
  -1   7   1    6.15    1.13
  -1   7   1    8.03    1.34
  -1   7   1    6.87    1.82
  -1   7   1    6.48    1.94
   0  -7  -1    5.98    1.20
   0  -7  -1    4.67    1.41
   0  -7  -1    5.73    1.47
   0  -7  -1    5.49    1.16
   0  -7  -1    4.08    1.32
   0   7   1    3.23    1.18
   0   7   1    4.47    1.87
   0   7   1    3.80    1.22
   0   7   1    8.00    1.58
   0   7   1    5.91    1.81
  -1  -7  -1    1.58    1.21
  -1  -7  -1    2.24    0.83
  -1  -7  -1    1.29    1.16
  -1  -7  -1    1.23    0.92
  -1  -7  -1    2.49    1.57
   1   7   1    0.86    1.23
   1   7   1    0.84    1.50
   1   7   1    2.08    0.97
   1   7   1    2.28    1.00
   1   7   1    3.43    1.56
   1   7   1    2.36    1.24
  -2  -7  -1   -0.14    0.72
  -2  -7  -1    0.67    1.10
  -2  -7  -1    0.13    1.13
  -2  -7  -1    0.57    1.32
  -2  -7  -1    2.64    1.74
   2   7   1   -0.20    1.35
   2   7   1    1.04    0.76
   2   7   1   -0.44    1.11
   2   7   1    0.97    1.50
  -3  -7  -1   31.29    2.98
  -3  -7  -1   37.69    1.51
  -3  -7  -1   38.57    2.80
  -3  -7  -1   36.48    2.46
  -3  -7  -1   38.55    2.34
   3   7   1   37.93    2.83
   3   7   1   35.37    1.52
   3   7   1   38.01    2.68
   3   7   1   35.47    2.78
  -4  -7  -1   29.99    2.76
  -4  -7  -1   30.55    2.36
  -4  -7  -1   29.64    2.20
  -4  -7  -1   31.01    1.27
  -4  -7  -1   32.98    3.22
   4   7   1   32.14    1.36
   4   7   1   31.59    3.28
   4   7   1   29.79    2.76
   4   7   1   32.07    2.59
   4   7   1   35.40    2.98
  -5  -7  -1   -1.18    1.07
  -5  -7  -1    1.17    1.38
  -5  -7  -1    0.03    1.56
  -5  -7  -1   -0.84    1.85
   5   7   1   -0.30    1.91
   5   7   1    1.68    1.76
   5   7   1    0.66    1.72
   5   7   1    0.18    1.61
  -6  -7  -1   -0.93    1.37
  -6  -7  -1   -2.06    1.28
  -6  -7  -1    1.48    1.73
  -6  -7  -1   -1.33    1.95
   6   7   1    1.14    1.70
   6   7   1    0.26    1.72
   6   7   1    0.34    2.20
   6   7   1    1.99    1.58
  -7  -7  -1   15.36    2.08
  -7  -7  -1   16.47    2.49
  -7  -7  -1   20.06    3.74
  -7  -7  -1   19.82    3.04
   7   7   1   13.55    2.69
   7   7   1   19.00    3.04
   7   7   1   20.56    3.62
   7   7   1   13.30    2.40
  -8  -7  -1    5.65    2.02
  -8  -7  -1    4.29    3.06
  -8  -7  -1    3.84    2.27
  -8  -7  -1    8.51    1.91
   8   7   1    2.54    1.90
   8   7   1    2.31    2.36
   8   7   1    4.68    2.81
   8   7   1    4.65    2.23
  -9  -7  -1   -0.94    1.80
  -9  -7  -1    2.33    1.83
  -9  -7  -1    6.31    3.38
   9   7   1   -0.04    1.59
   9   7   1    5.38    2.79
   9   7   1   -0.93    1.85
 -10  -7  -1    0.64    1.64
 -10  -7  -1   -6.18    2.91
 -10  -7  -1   -0.75    1.86
  10   7   1    4.00    2.54
  10   7   1   -1.45    1.98
   6  -8  -1    2.33    1.96
   6  -8  -1    1.30    1.99
  -6   8   1    1.91    2.29
  -6   8   1    1.44    1.91
   5  -8  -1   -0.58    1.62
   5  -8  -1    0.76    1.46
   5  -8  -1   -2.31    1.70
  -5   8   1    0.83    2.06
  -5   8   1    2.67    1.91
   4  -8  -1    8.35    1.87
   4  -8  -1    7.22    2.13
   4  -8  -1    4.27    1.97
  -4   8   1    8.40    1.96
  -4   8   1    5.95    2.35
   3  -8  -1   -0.95    1.54
   3  -8  -1    1.19    1.37
   3  -8  -1    0.18    1.33
  -3   8   1    0.52    1.54
  -3   8   1    1.77    1.79
  -3   8   1   -0.51    1.80
   2  -8  -1   -0.05    1.33
   2  -8  -1    1.13    1.41
   2  -8  -1    2.20    1.63
  -2   8   1    2.13    1.67
  -2   8   1    1.99    1.82
  -2   8   1    3.84    1.77
   1  -8  -1    6.26    1.74
   1  -8  -1    6.06    1.49
   1  -8  -1    5.15    1.58
  -1   8   1    5.89    1.81
  -1   8   1    6.32    1.55
  -1   8   1    5.71    2.23
   0  -8  -1   10.77    1.97
   0  -8  -1    9.92    1.44
   0  -8  -1    9.41    1.75
   0  -8  -1    8.52    1.72
   0   8   1   10.41    2.34
   0   8   1   12.04    1.89
   0   8   1   10.62    1.59
   0   8   1    9.09    1.55
   0   8   1   11.73    2.24
  -1  -8  -1    1.99    1.28
  -1  -8  -1    0.71    0.91
  -1  -8  -1    2.95    1.47
  -1  -8  -1    1.48    1.61
  -1  -8  -1    2.30    1.40
   1   8   1    3.12    1.19
   1   8   1    4.54    1.55
   1   8   1    0.84    1.16
   1   8   1    1.05    1.74
   1   8   1   -0.80    1.66
  -2  -8  -1   11.70    1.30
  -2  -8  -1   10.69    2.49
  -2  -8  -1   12.35    1.81
  -2  -8  -1   12.30    2.04
  -2  -8  -1   10.00    1.84
   2   8   1   12.67    2.33
   2   8   1   13.26    2.37
   2   8   1   15.08    1.48
   2   8   1   13.62    2.41
   2   8   1   11.65    1.93
  -3  -8  -1    1.14    1.49
  -3  -8  -1    3.21    1.44
  -3  -8  -1    2.57    1.52
  -3  -8  -1    1.72    1.87
   3   8   1    2.11    1.98
   3   8   1    0.28    1.49
   3   8   1    0.17    1.76
   3   8   1    0.85    0.77
   3   8   1    0.97    1.43
  -4  -8  -1    9.93    1.95
  -4  -8  -1   14.93    2.97
  -4  -8  -1   11.69    1.86
  -4  -8  -1    9.35    2.13
   4   8   1    9.05    2.22
   4   8   1   10.57    2.26
   4   8   1   12.03    2.47
   4   8   1   13.12    2.97
  -5  -8  -1    3.46    1.62
  -5  -8  -1    0.70    1.79
  -5  -8  -1    4.28    1.71
  -5  -8  -1   -0.41    2.16
   5   8   1    0.74    2.01
   5   8   1    1.20    1.56
   5   8   1    3.02    1.97
   5   8   1    3.31    2.49
  -6  -8  -1   -2.08    2.09
  -6  -8  -1   -0.58    1.60
  -6  -8  -1   -0.26    1.82
  -6  -8  -1   -2.16    1.45
   6   8   1   -0.07    1.96
   6   8   1   -1.39    1.83
   6   8   1   -0.48    2.00
   6   8   1    0.82    2.27
  -7  -8  -1    2.09    2.14
  -7  -8  -1   -0.95    1.29
  -7  -8  -1   -0.92    1.65
  -7  -8  -1   -1.06    2.30
   7   8   1   -0.40    1.59
   7   8   1    1.74    2.02
   7   8   1    3.85    2.36
   7   8   1    0.07    2.66
  -8  -8  -1    0.55    1.79
  -8  -8  -1   -0.61    2.76
  -8  -8  -1    0.98    1.74
   8   8   1    1.70    2.21
   8   8   1    2.92    4.09
   8   8   1    3.69    2.75
   8   8   1    0.64    2.02
  -9  -8  -1    4.01    1.98
  -9  -8  -1    1.82    3.14
  -9  -8  -1    1.26    1.93
   9   8   1    0.33    2.25
   9   8   1    3.94    2.62
   9   8   1    0.37    1.66
 -10  -8  -1   -2.35    3.46
 -10  -8  -1   -1.35    1.62
 -10  -8  -1   -2.45    1.88
  10   8   1    1.87    2.36
  10   8   1    8.95    3.05
   5  -9  -1    1.74    2.04
   5  -9  -1    2.36    1.85
  -5   9   1    1.26    2.01
  -5   9   1    1.06    1.82
   4  -9  -1    8.08    2.13
   4  -9  -1    9.06    1.94
   4  -9  -1    7.87    2.30
  -4   9   1    7.76    2.28
  -4   9   1    7.82    2.61
   3  -9  -1    6.41    1.76
   3  -9  -1    6.09    1.84
   3  -9  -1    2.63    1.94
  -3   9   1    5.49    1.96
  -3   9   1    4.45    1.99
   2  -9  -1   -0.82    1.32
   2  -9  -1    1.52    1.79
   2  -9  -1    0.73    1.34
  -2   9   1    1.41    1.71
  -2   9   1    1.12    2.15
  -2   9   1    0.16    2.23
   1  -9  -1   14.55    2.32
   1  -9  -1   14.59    1.94
   1  -9  -1   17.17    2.31
  -1   9   1   15.20    2.83
  -1   9   1   20.73    2.48
  -1   9   1   18.15    3.03
   0  -9  -1    0.44    1.43
   0  -9  -1   -0.07    1.09
   0  -9  -1    1.31    1.56
   0   9   1    0.60    1.55
   0   9   1    2.38    2.12
   0   9   1    4.37    1.57
  -1  -9  -1    4.42    2.01
  -1  -9  -1    4.78    1.41
  -1  -9  -1    2.85    1.48
  -1  -9  -1    5.10    1.69
  -1  -9  -1    3.43    1.63
   1   9   1    3.67    1.32
   1   9   1    3.94    2.15
   1   9   1    7.35    1.97
   1   9   1    0.22    1.98
   1   9   1    3.41    1.61
  -2  -9  -1    1.69    1.88
  -2  -9  -1    1.12    1.42
  -2  -9  -1    1.64    1.44
  -2  -9  -1   -1.22    1.41
   2   9   1    1.27    1.65
   2   9   1    3.35    2.19
   2   9   1    3.33    2.08
   2   9   1    1.09    2.05
   2   9   1    0.72    1.08
  -3  -9  -1   11.14    3.00
  -3  -9  -1    8.30    2.28
  -3  -9  -1    6.92    1.82
  -3  -9  -1    8.56    2.03
   3   9   1    6.24    2.19
   3   9   1    5.54    2.38
   3   9   1   12.39    2.96
   3   9   1    5.10    2.24
  -4  -9  -1    1.87    1.55
  -4  -9  -1    0.26    2.10
  -4  -9  -1    0.41    1.49
  -4  -9  -1    1.72    1.79
   4   9   1    6.52    2.84
   4   9   1    2.23    2.27
   4   9   1    4.01    2.24
   4   9   1    3.11    2.24
  -5  -9  -1    1.74    1.78
  -5  -9  -1    3.02    2.63
  -5  -9  -1    2.19    1.92
  -5  -9  -1    1.21    1.57
   5   9   1   -2.06    2.10
   5   9   1    6.58    2.86
   5   9   1    3.52    2.12
   5   9   1    1.77    2.11
  -6  -9  -1   14.65    2.22
  -6  -9  -1   11.97    2.69
  -6  -9  -1   11.38    3.35
  -6  -9  -1    9.82    2.25
   6   9   1    9.75    2.86
   6   9   1   15.54    3.76
   6   9   1   10.63    2.77
   6   9   1    9.36    2.56
  -7  -9  -1    3.21    1.95
  -7  -9  -1    2.02    2.22
  -7  -9  -1    2.37    1.70
  -7  -9  -1    1.92    2.76
   7   9   1   -0.31    2.25
   7   9   1   -2.11    2.12
   7   9   1    3.97    2.94
   7   9   1    3.28    2.47
  -8  -9  -1    3.55    1.78
  -8  -9  -1   -1.05    1.70
  -8  -9  -1    2.09    2.98
   8   9   1   -1.58    2.14
   8   9   1   -1.95    2.25
   8   9   1    7.51    3.37
  -9  -9  -1    5.11    3.56
  -9  -9  -1    2.07    1.80
  -9  -9  -1    6.50    2.36
   9   9   1   11.56    3.35
   9   9   1    2.50    2.12
   9   9   1    0.14    2.53
   4 -10  -1   -1.42    1.97
   4 -10  -1    0.64    1.80
   4 -10  -1    3.77    1.77
  -4  10   1   -1.35    1.78
  -4  10   1    3.50    2.46
   3 -10  -1    7.52    2.04
   3 -10  -1    3.68    1.77
   3 -10  -1    0.97    2.05
  -3  10   1    2.90    1.88
  -3  10   1    1.77    2.31
   2 -10  -1    2.25    1.95
   2 -10  -1    1.99    1.80
   2 -10  -1    2.35    1.55
  -2  10   1    2.50    1.84
  -2  10   1    0.91    1.77
   1 -10  -1    1.44    1.83
   1 -10  -1    6.36    1.91
   1 -10  -1    3.24    1.66
  -1  10   1    1.14    2.26
  -1  10   1    5.80    1.74
  -1  10   1    2.50    2.40
   0 -10  -1   -0.74    1.72
   0 -10  -1    0.59    1.68
   0  10   1    0.37    2.06
   0  10   1   -0.35    2.25
   0  10   1    2.38    1.43
  -1 -10  -1    3.18    2.50
  -1 -10  -1    4.26    1.83
  -1 -10  -1    2.85    1.92
   1  10   1    6.77    1.92
   1  10   1    0.73    2.36
   1  10   1    2.36    2.33
  -2 -10  -1    3.03    1.69
  -2 -10  -1    4.21    2.20
  -2 -10  -1    4.80    1.88
  -2 -10  -1    4.54    1.85
   2  10   1    0.23    2.31
   2  10   1    4.33    1.83
   2  10   1    4.53    2.44
   2  10   1    5.51    2.21
  -3 -10  -1   -0.60    1.61
  -3 -10  -1   -1.31    1.46
  -3 -10  -1   -0.04    1.64
  -3 -10  -1   -1.12    2.03
   3  10   1   -3.22    2.32
   3  10   1    1.50    1.83
   3  10   1    2.84    2.23
   3  10   1    1.48    1.86
  -4 -10  -1    8.33    2.18
  -4 -10  -1    2.51    1.72
  -4 -10  -1    2.26    1.93
  -4 -10  -1    0.90    2.30
   4  10   1    0.53    2.34
   4  10   1    2.51    2.07
   4  10   1    5.97    2.63
   4  10   1    0.34    2.24
  -5 -10  -1   28.60    4.34
  -5 -10  -1   21.59    3.23
  -5 -10  -1   28.95    3.08
  -5 -10  -1   21.19    2.88
   5  10   1   31.56    3.92
   5  10   1   29.05    3.59
   5  10   1   33.18    4.62
   5  10   1   23.66    3.35
  -6 -10  -1   -0.28    2.04
  -6 -10  -1    2.32    1.87
  -6 -10  -1    0.08    1.64
  -6 -10  -1   -0.63    2.54
   6  10   1   -0.45    2.25
   6  10   1    7.57    3.22
   6  10   1   -0.38    2.38
   6  10   1   -1.86    2.12
  -7 -10  -1    1.43    1.76
  -7 -10  -1    1.10    2.86
  -7 -10  -1    1.25    1.82
   7  10   1   -1.31    2.41
   7  10   1   -1.85    2.59
   7  10   1    4.98    3.12
  -8 -10  -1   11.18    3.84
  -8 -10  -1   12.43    2.71
  -8 -10  -1   12.78    2.29
   8  10   1    8.75    3.11
   8  10   1   20.78    4.28
   8  10   1    9.90    3.27
  -9 -10  -1    8.98    4.01
  -9 -10  -1    5.55    2.39
  -9 -10  -1    7.10    2.16
   9  10   1    1.85    2.83
   9  10   1    3.84    2.35
   9  10   1   14.74    3.98
   2 -11  -1   -2.83    1.87
   2 -11  -1    1.25    1.67
  -2  11   1    0.42    2.37
  -2  11   1   -0.43    1.65
   1 -11  -1    5.13    1.88
   1 -11  -1    3.74    2.04
  -1  11   1    3.01    1.88
  -1  11   1    0.15    2.26
  -1  11   1   -3.70    2.30
   0 -11  -1    9.93    2.40
   0 -11  -1   12.53    2.44
   0  11   1    8.26    3.27
   0  11   1   10.86    2.90
  -1 -11  -1   -0.48    1.83
  -1 -11  -1    3.34    1.95
   1  11   1   -0.77    2.19
   1  11   1   -3.22    2.42
  -2 -11  -1   -2.84    2.28
  -2 -11  -1    1.56    1.83
  -2 -11  -1    5.48    1.94
   2  11   1   -3.09    2.49
   2  11   1    2.72    2.35
  -3 -11  -1    8.93    2.25
  -3 -11  -1    8.71    2.46
  -3 -11  -1   10.82    3.24
   3  11   1    8.95    2.41
   3  11   1    6.63    2.96
   3  11   1   10.14    2.97
  -4 -11  -1    6.20    2.22
  -4 -11  -1    3.49    1.97
  -4 -11  -1    7.42    2.98
  -4 -11  -1    5.26    2.01
   4  11   1   13.92    3.17
   4  11   1    6.08    2.74
   4  11   1    4.01    2.37
   4  11   1    4.52    2.31
  -5 -11  -1    3.29    2.82
  -5 -11  -1   -0.42    1.76
  -5 -11  -1    1.63    1.84
  -5 -11  -1   -0.22    1.90
   5  11   1   -0.59    2.05
   5  11   1    9.54    3.25
   5  11   1   -3.54    2.22
   5  11   1   -0.23    2.65
  -6 -11  -1    4.46    3.08
  -6 -11  -1   -0.63    1.76
  -6 -11  -1    4.11    2.19
   6  11   1   -2.66    1.91
   6  11   1   -0.64    2.42
   6  11   1   10.03    3.44
  -7 -11  -1    1.21    3.10
  -7 -11  -1    6.42    2.40
  -7 -11  -1    9.30    2.45
   7  11   1   16.55    4.19
   7  11   1    5.85    3.14
   7  11   1    0.47    2.58
  -8 -11  -1   -1.22    3.07
   8  11   1   12.50    3.90
   8  11   1   -3.16    2.72
   8  11   1   -6.01    2.29
   0 -12  -1    7.98    2.38
   0 -12  -1    0.37    2.09
   0  12   1   -0.86    2.87
   0  12   1    8.27    2.87
  -1 -12  -1    1.17    2.07
  -1 -12  -1    6.65    2.23
   1  12   1    5.99    2.77
   1  12   1   -6.93    2.57
  -2 -12  -1    1.66    1.94
  -2 -12  -1    4.40    2.34
   2  12   1   -4.08    2.67
   2  12   1    0.32    1.86
  -3 -12  -1    3.37    2.03
  -3 -12  -1   -0.89    1.89
   3  12   1   -2.19    2.30
   3  12   1    0.72    2.98
  -4 -12  -1    1.70    2.74
  -4 -12  -1    0.01    1.80
  -4 -12  -1    2.52    2.06
   4  12   1    0.67    2.24
   4  12   1   -3.83    2.78
   4  12   1   -1.81    2.52
   4  12   1   11.56    2.93
  -5 -12  -1    6.65    2.26
  -5 -12  -1    0.76    1.90
  -5 -12  -1   -2.23    3.01
   5  12   1    0.36    2.46
   5  12   1   -1.38    2.45
  -6 -12  -1    3.44    3.61
  -6 -12  -1    1.81    2.09
  -6 -12  -1    3.53    2.18
   6  12   1    0.97    2.62
   6  12   1   19.58    4.32
   6  12   1   -0.63    3.07
   6  11  -2    1.44    2.93
   6  11  -2    3.43    2.53
  -6 -11   2    4.58    2.41
  -6 -11   2    4.40    3.27
   5  11  -2   -0.33    2.72
   5  11  -2   -0.27    2.77
  -5 -11   2    4.44    2.26
  -5 -11   2    3.53    2.96
   4  11  -2    1.19    2.66
   4  11  -2    3.21    2.29
  -4 -11   2    2.26    1.79
  -4 -11   2    2.29    2.01
  -4 -11   2    3.59    2.75
   3  11  -2   -2.99    2.30
   3  11  -2   -2.08    2.44
  -3 -11   2    2.71    2.01
  -3 -11   2   -0.58    2.60
  -3 -11   2    5.45    2.30
  -3 -11   2   -0.60    1.70
   2  11  -2   -0.97    2.50
   2  11  -2    2.43    2.62
  -2 -11   2    1.60    1.93
  -2 -11   2   -1.01    1.66
   1  11  -2   -0.19    2.39
   1  11  -2   -3.15    2.28
  -1 -11   2    3.51    1.99
  -1 -11   2   -0.57    1.83
   0  11  -2   -2.65    2.29
   0  11  -2    5.65    2.12
   0 -11   2   -2.46    1.78
   0 -11   2   -0.54    1.76
  -1  11  -2    5.87    2.13
  -1  11  -2    6.29    2.44
   1 -11   2    2.93    2.14
   1 -11   2    7.19    2.29
   8  10  -2   -2.87    2.69
   8  10  -2    0.75    2.77
  -8 -10   2    2.37    3.33
  -8 -10   2    0.05    2.10
   7  10  -2    9.04    3.20
   7  10  -2    4.20    3.01
  -7 -10   2    6.93    3.47
  -7 -10   2    7.98    2.53
   6  10  -2    1.13    2.77
   6  10  -2   -4.52    2.23
  -6 -10   2    1.78    2.12
  -6 -10   2    1.49    2.85
   5  10  -2   -0.99    2.44
   5  10  -2   -3.29    2.38
   5  10  -2    4.72    2.68
  -5 -10   2    1.64    1.73
  -5 -10   2    2.23    1.98
  -5 -10   2    3.50    2.23
  -5 -10   2    4.33    2.79
   4  10  -2    0.26    1.90
   4  10  -2    1.29    2.02
   4  10  -2    3.63    2.62
  -4 -10   2    0.18    1.74
  -4 -10   2   -0.07    2.46
  -4 -10   2    2.58    1.95
  -4 -10   2   -1.44    1.43
   3  10  -2   -3.13    2.19
   3  10  -2    0.80    2.11
   3  10  -2    1.14    2.36
  -3 -10   2    1.37    1.66
  -3 -10   2    3.54    1.92
  -3 -10   2   -1.08    1.63
  -3 -10   2    3.76    2.74
   2  10  -2   16.19    3.18
   2  10  -2   18.77    2.87
   2  10  -2   12.44    3.02
  -2 -10   2   12.88    2.54
  -2 -10   2   13.07    2.25
  -2 -10   2   14.45    2.57
  -2 -10   2   15.54    3.32
   1  10  -2    3.50    2.62
   1  10  -2    4.57    1.86
   1  10  -2    2.45    2.59
  -1 -10   2    2.88    2.08
  -1 -10   2    3.32    1.94
   0  10  -2   -0.71    1.72
   0  10  -2    2.12    1.66
   0  10  -2    0.07    2.10
   0 -10   2   -1.60    1.67
   0 -10   2    3.41    1.90
  -1  10  -2    5.56    2.00
  -1  10  -2    2.58    2.48
   1 -10   2    6.02    2.06
   1 -10   2    3.22    2.08
  -2  10  -2   13.53    2.59
  -2  10  -2    9.11    2.84
   2 -10   2   10.13    2.43
   2 -10   2   10.44    2.45
  -3  10  -2    2.58    2.64
  -3  10  -2    1.51    1.88
   3 -10   2    5.13    2.03
   3 -10   2   -1.35    1.94
   9   9  -2    2.27    2.67
   9   9  -2   -3.05    2.49
  -9  -9   2    2.87    3.54
  -9  -9   2    5.90    2.63
   8   9  -2   -4.23    2.17
   8   9  -2    0.77    2.61
  -8  -9   2    0.51    2.95
  -8  -9   2    2.13    2.12
   7   9  -2   13.63    3.24
   7   9  -2    6.05    2.83
  -7  -9   2   11.47    2.59
  -7  -9   2   12.88    3.78
   6   9  -2   -0.22    2.05
   6   9  -2    5.34    2.71
   6   9  -2    1.15    2.44
  -6  -9   2   -0.69    2.61
  -6  -9   2    2.09    1.58
  -6  -9   2    3.69    2.06
  -6  -9   2    1.25    2.22
   5   9  -2    9.17    2.73
   5   9  -2    9.85    2.75
   5   9  -2    6.01    2.67
  -5  -9   2    8.03    2.29
  -5  -9   2    8.31    3.17
  -5  -9   2    7.67    1.88
  -5  -9   2    7.52    2.38
   4   9  -2    5.04    2.61
   4   9  -2    2.21    2.42
   4   9  -2    5.24    2.23
  -4  -9   2    3.79    1.69
  -4  -9   2    4.23    2.09
  -4  -9   2    1.64    1.89
  -4  -9   2    4.63    2.73
   3   9  -2   55.22    3.92
   3   9  -2   57.83    3.08
   3   9  -2   50.72    4.07
   3   9  -2   62.35    4.12
  -3  -9   2   63.71    3.68
  -3  -9   2   60.37    3.98
  -3  -9   2   58.04    3.69
  -3  -9   2   56.88    4.50
   2   9  -2    4.74    1.86
   2   9  -2    2.63    1.86
   2   9  -2    4.43    2.44
   2   9  -2    4.01    1.48
  -2  -9   2    2.71    1.79
  -2  -9   2    2.61    1.77
  -2  -9   2    2.63    2.32
  -2  -9   2    3.92    1.72
   1   9  -2    1.67    2.39
   1   9  -2    1.15    1.44
   1   9  -2   -0.74    2.12
   1   9  -2    0.62    1.57
  -1  -9   2    0.50    1.55
  -1  -9   2    2.76    1.74
  -1  -9   2    3.18    1.65
  -1  -9   2    0.48    1.99
   0   9  -2    3.95    2.30
   0   9  -2    2.71    2.37
   0   9  -2    4.12    1.71
   0  -9   2    2.19    1.70
   0  -9   2    4.11    1.82
  -1   9  -2    0.98    1.62
  -1   9  -2   -1.47    2.04
   1  -9   2    1.10    1.66
   1  -9   2   -1.52    1.58
  -2   9  -2    0.14    1.74
  -2   9  -2    0.93    1.73
   2  -9   2    5.26    2.05
   2  -9   2    2.60    1.77
   2  -9   2   -0.09    1.76
  -3   9  -2    2.07    2.36
  -3   9  -2   -0.80    1.71
   3  -9   2    2.94    1.95
   3  -9   2    3.72    1.63
   3  -9   2   -1.28    1.87
  -4   9  -2   -1.81    2.18
  -4   9  -2    0.89    1.96
  -4   9  -2   -0.82    1.55
   4  -9   2    1.81    1.91
   4  -9   2    0.30    2.12
   4  -9   2    4.23    1.93
   9   8  -2    4.06    2.54
   9   8  -2    1.25    2.43
  -9  -8   2    1.21    2.03
  -9  -8   2   -0.12    3.26
   8   8  -2   10.51    3.01
   8   8  -2    8.22    2.73
  -8  -8   2    7.39    2.26
  -8  -8   2    9.43    3.68
   7   8  -2   15.75    3.20
   7   8  -2   14.07    2.97
   7   8  -2   21.46    3.48
  -7  -8   2   18.51    2.77
  -7  -8   2   14.85    3.14
  -7  -8   2   17.98    3.93
   6   8  -2    4.43    2.43
   6   8  -2    1.64    2.29
   6   8  -2    1.13    2.23
  -6  -8   2    0.07    1.40
  -6  -8   2    2.52    2.09
  -6  -8   2    4.27    1.95
  -6  -8   2    2.26    2.69
   5   8  -2   -0.24    2.05
   5   8  -2    2.21    2.24
   5   8  -2    5.65    2.31
  -5  -8   2    1.26    1.77
  -5  -8   2    0.62    1.45
  -5  -8   2    3.21    2.02
  -5  -8   2    1.65    2.44
   4   8  -2   15.23    2.50
   4   8  -2   18.75    2.01
   4   8  -2   18.09    2.67
   4   8  -2   16.64    2.88
  -4  -8   2   15.13    3.26
  -4  -8   2   18.49    2.81
  -4  -8   2   17.84    2.09
  -4  -8   2   16.21    2.52
   3   8  -2    8.47    2.19
   3   8  -2    2.99    2.21
   3   8  -2    8.59    2.39
   3   8  -2   10.30    1.73
  -3  -8   2    7.66    1.80
  -3  -8   2    3.55    1.72
  -3  -8   2    6.77    2.48
  -3  -8   2    7.31    2.05
   2   8  -2    0.45    1.94
   2   8  -2    2.00    1.58
   2   8  -2    2.94    1.45
   2   8  -2   -0.69    2.03
  -2  -8   2    1.30    1.88
  -2  -8   2    2.09    1.62
  -2  -8   2    1.59    1.52
  -2  -8   2    2.35    1.39
   1   8  -2    0.70    1.66
   1   8  -2    3.94    2.21
   1   8  -2    2.22    1.43
   1   8  -2    2.65    1.52
  -1  -8   2    0.36    1.44
  -1  -8   2    1.78    1.45
  -1  -8   2    0.23    1.72
  -1  -8   2    1.07    1.52
   0   8  -2    3.61    1.75
   0   8  -2    4.06    1.57
   0   8  -2    1.35    2.12
   0  -8   2    4.71    1.46
   0  -8   2    1.99    1.16
   0  -8   2    4.83    1.78
   0  -8   2    3.41    1.60
   0  -8   2    3.37    1.80
  -1   8  -2    4.72    1.95
  -1   8  -2   -0.98    1.82
  -1   8  -2   -0.24    2.13
   1  -8   2    2.91    1.25
   1  -8   2    2.05    1.61
   1  -8   2    2.57    1.65
  -2   8  -2    4.21    1.43
  -2   8  -2    0.79    1.69
  -2   8  -2    0.27    1.58
   2  -8   2    1.27    1.29
   2  -8   2    0.72    1.61
   2  -8   2    1.51    1.73
  -3   8  -2    2.80    1.83
  -3   8  -2    3.23    1.60
  -3   8  -2    4.60    2.39
   3  -8   2    4.23    2.02
   3  -8   2    6.20    2.17
   3  -8   2    6.20    1.72
  -4   8  -2    1.61    1.85
  -4   8  -2   -0.32    2.05
  -4   8  -2   -0.92    1.70
   4  -8   2   -0.40    1.64
   4  -8   2    2.33    1.96
   4  -8   2    0.50    1.75
  -5   8  -2   -0.75    1.84
  -5   8  -2    2.35    2.19
  -5   8  -2    1.53    1.96
   5  -8   2    1.30    2.08
   5  -8   2    2.39    1.95
   5  -8   2    1.81    1.96
  -6   8  -2    6.61    2.34
  -6   8  -2    2.74    2.15
  -6   8  -2    5.99    2.65
   6  -8   2    4.52    2.06
   6  -8   2    0.05    2.10
   6  -8   2    3.03    2.07
  10   7  -2    9.00    3.12
  10   7  -2    4.68    2.45
  10   7  -2    2.18    2.68
 -10  -7   2    4.57    2.22
 -10  -7   2    3.43    3.65
   9   7  -2    1.71    2.40
   9   7  -2    4.06    2.40
  -9  -7   2    3.77    2.08
  -9  -7   2    6.02    3.67
   8   7  -2    2.69    2.25
   8   7  -2    8.75    2.58
   8   7  -2    5.43    2.60
  -8  -7   2    4.13    1.92
  -8  -7   2    9.38    3.47
  -8  -7   2    5.75    3.06
   7   7  -2    1.98    1.75
   7   7  -2   -1.88    1.89
   7   7  -2    0.22    1.58
  -7  -7   2   -0.51    1.23
  -7  -7   2   -0.09    1.87
  -7  -7   2    1.09    1.66
  -7  -7   2   -0.37    1.50
   6   7  -2    5.11    2.29
   6   7  -2    3.20    2.17
   6   7  -2    3.49    2.29
   6   7  -2    4.73    1.59
  -6  -7   2    3.80    1.82
  -6  -7   2    5.44    1.44
  -6  -7   2    4.77    2.66
  -6  -7   2    5.66    2.15
   5   7  -2   -0.33    1.38
   5   7  -2    1.11    1.35
   5   7  -2   -0.20    1.42
   5   7  -2    2.85    2.09
  -5  -7   2    3.59    1.71
  -5  -7   2    3.29    2.45
  -5  -7   2    1.44    1.11
  -5  -7   2    4.73    2.04
   4   7  -2   36.40    3.23
   4   7  -2   37.72    2.29
   4   7  -2   32.87    3.01
   4   7  -2   39.53    3.16
  -4  -7   2   33.77    3.54
  -4  -7   2   35.54    2.24
  -4  -7   2   31.14    2.69
  -4  -7   2   31.86    3.05
   3   7  -2   13.05    2.39
   3   7  -2   11.62    2.21
   3   7  -2   16.01    1.86
  -3  -7   2   14.31    2.76
  -3  -7   2   13.75    1.72
  -3  -7   2   12.17    2.04
  -3  -7   2   14.33    2.29
   2   7  -2    2.69    1.64
   2   7  -2    2.69    1.90
   2   7  -2    3.00    1.20
  -2  -7   2    3.07    1.48
  -2  -7   2    2.01    1.81
  -2  -7   2    1.34    1.35
  -2  -7   2    1.62    1.16
   1   7  -2    3.33    1.56
   1   7  -2    5.29    1.39
   1   7  -2    4.91    1.63
  -1  -7   2    4.64    1.51
  -1  -7   2    3.31    1.50
  -1  -7   2    3.36    0.80
  -1  -7   2    7.32    2.09
  -1  -7   2    4.21    1.47
   0   7  -2    2.37    1.62
   0   7  -2   -0.55    1.35
   0   7  -2   -0.66    1.85
   0  -7   2    2.32    1.23
   0  -7   2    0.56    1.31
   0  -7   2    1.91    0.89
   0  -7   2    0.73    1.44
   0  -7   2    0.68    1.38
  -1   7  -2   -0.29    1.85
  -1   7  -2   -1.25    0.99
  -1   7  -2   -0.37    1.51
  -1   7  -2    0.76    1.37
   1  -7   2    0.56    1.00
   1  -7   2    0.68    1.04
   1  -7   2   -0.22    1.21
   1  -7   2    0.28    1.34
   1  -7   2   -0.17    1.39
  -2   7  -2    4.54    1.75
  -2   7  -2    4.24    1.80
  -2   7  -2    7.02    1.96
  -2   7  -2    6.01    1.52
   2  -7   2    3.78    1.67
   2  -7   2    4.66    1.80
   2  -7   2    5.02    1.52
  -3   7  -2    6.24    2.33
  -3   7  -2    7.09    2.00
  -3   7  -2    3.34    1.49
   3  -7   2    3.83    1.83
   3  -7   2    7.65    2.20
   3  -7   2    7.08    1.65
  -4   7  -2    9.66    2.56
  -4   7  -2    7.34    2.13
  -4   7  -2    9.96    2.16
   4  -7   2    9.89    1.95
   4  -7   2    7.56    2.27
   4  -7   2    7.49    2.05
  -5   7  -2    0.31    1.65
  -5   7  -2   -1.27    1.83
  -5   7  -2   -2.24    1.64
   5  -7   2   -0.42    1.86
   5  -7   2    0.84    1.57
   5  -7   2   -2.83    1.70
  -6   7  -2   -1.26    1.81
  -6   7  -2    3.84    2.25
  -6   7  -2    2.50    2.01
   6  -7   2    2.04    1.98
   6  -7   2    4.50    2.04
   6  -7   2    1.06    1.91
  -7   7  -2    1.50    2.13
  -7   7  -2   -0.48    2.07
  -7   7  -2    1.09    2.06
   7  -7   2   -1.15    1.95
   7  -7   2   -4.43    1.91
   7  -7   2    1.17    1.89
  10   6  -2    1.54    2.35
  10   6  -2   12.18    3.40
  10   6  -2    6.16    2.43
 -10  -6   2   -0.26    2.49
 -10  -6   2   -0.01    1.82
 -10  -6   2   -1.34    3.07
   9   6  -2   -0.21    2.00
   9   6  -2    1.27    2.08
  -9  -6   2    1.32    1.78
  -9  -6   2    2.75    3.14
  -9  -6   2    0.65    2.39
   8   6  -2    3.66    2.36
   8   6  -2   -0.05    1.47
   8   6  -2    0.58    1.92
  -8  -6   2    3.19    1.43
  -8  -6   2    3.14    2.83
  -8  -6   2    1.04    1.70
  -8  -6   2    2.84    2.25
  -8  -6   2    0.67    1.67
   7   6  -2   10.90    2.49
   7   6  -2   13.69    2.60
   7   6  -2   13.48    2.81
   7   6  -2    9.27    1.74
  -7  -6   2   14.22    2.28
  -7  -6   2   15.02    1.83
  -7  -6   2   12.60    2.69
  -7  -6   2   11.97    3.38
  -7  -6   2   15.12    2.52
   6   6  -2    0.93    1.89
   6   6  -2    4.96    2.07
   6   6  -2    2.09    1.37
   6   6  -2    4.01    2.08
  -6  -6   2    1.19    1.95
  -6  -6   2    2.18    1.80
  -6  -6   2   -0.75    2.08
  -6  -6   2    2.51    1.65
  -6  -6   2    5.50    1.28
   5   6  -2    3.40    1.83
   5   6  -2    3.02    1.32
   5   6  -2    4.87    1.97
   5   6  -2    0.89    1.70
  -5  -6   2    4.99    1.90
  -5  -6   2    6.01    1.21
  -5  -6   2    4.94    2.31
  -5  -6   2    3.52    1.82
  -5  -6   2    2.98    1.53
   4   6  -2   24.28    2.21
   4   6  -2   25.11    1.94
   4   6  -2   28.10    2.83
  -4  -6   2   28.87    1.93
  -4  -6   2   26.45    3.40
  -4  -6   2   27.53    2.73
  -4  -6   2   26.14    2.34
   3   6  -2   73.90    3.58
   3   6  -2   78.07    2.93
   3   6  -2   75.67    3.65
  -3  -6   2   74.81    3.36
  -3  -6   2   74.51    4.20
  -3  -6   2   74.54    2.96
  -3  -6   2   78.77    3.81
   2   6  -2   24.45    2.41
   2   6  -2   27.39    2.52
   2   6  -2   22.19    1.73
  -2  -6   2   21.22    1.75
  -2  -6   2   25.51    2.29
  -2  -6   2   24.24    2.55
  -2  -6   2   23.03    1.90
  -2  -6   2   27.18    1.08
  -2  -6   2   21.74    0.84
   1   6  -2   15.38    2.07
   1   6  -2   14.52    1.93
   1   6  -2   14.47    1.67
  -1  -6   2   14.16    1.06
  -1  -6   2   16.47    1.64
  -1  -6   2   15.58    2.32
  -1  -6   2   13.49    1.87
  -1  -6   2   14.01    1.74
   0   6  -2    0.14    1.63
   0   6  -2   -1.18    1.23
   0   6  -2    0.26    0.78
   0   6  -2    0.15    1.10
   0   6  -2    2.85    0.98
   0  -6   2    1.78    1.13
   0  -6   2    1.02    1.07
   0  -6   2   -0.02    1.20
   0  -6   2    1.01    0.73
   0  -6   2    1.03    1.32
  -1   6  -2   36.30    2.43
  -1   6  -2   35.81    2.10
  -1   6  -2   34.27    2.30
  -1   6  -2   38.22    2.59
   1  -6   2   35.51    2.05
   1  -6   2   37.13    2.33
   1  -6   2   33.79    2.46
   1  -6   2   38.28    2.10
   1  -6   2   37.41    2.44
  -2   6  -2   13.20    2.27
  -2   6  -2   14.70    1.91
  -2   6  -2   15.39    2.45
  -2   6  -2   17.47    2.21
  -2   6  -2   18.16    1.88
   2  -6   2   17.73    1.70
   2  -6   2   16.71    1.50
   2  -6   2   16.89    2.19
   2  -6   2   14.83    1.74
   2  -6   2   13.35    1.90
  -3   6  -2    1.98    1.80
  -3   6  -2    1.54    1.55
  -3   6  -2    1.84    1.40
  -3   6  -2   -0.26    1.37
   3  -6   2    0.30    1.18
   3  -6   2   -0.17    1.58
   3  -6   2    0.66    1.46
  -4   6  -2    9.82    2.09
  -4   6  -2    8.21    1.86
  -4   6  -2   10.92    2.23
   4  -6   2    9.94    1.91
   4  -6   2    9.58    2.15
   4  -6   2    9.56    2.01
  -5   6  -2    5.40    2.14
  -5   6  -2    6.68    2.10
  -5   6  -2    5.58    1.96
   5  -6   2    7.26    2.15
   5  -6   2    6.87    2.13
   5  -6   2    4.94    1.87
  -6   6  -2    7.07    2.20
  -6   6  -2   11.34    2.44
  -6   6  -2   10.23    2.47
   6  -6   2    6.45    2.25
   6  -6   2    5.87    2.16
   6  -6   2    8.96    2.17
  -7   6  -2   -0.66    1.80
  -7   6  -2    0.68    1.99
  -7   6  -2    0.19    1.91
   7  -6   2    1.14    2.04
   7  -6   2    4.21    2.05
   7  -6   2    1.82    2.09
  11   5  -2    8.71    2.54
  11   5  -2    2.59    2.18
 -11  -5   2   -3.39    2.22
 -11  -5   2   -0.08    1.94
 -11  -5   2    0.77    3.43
  10   5  -2    5.30    2.26
  10   5  -2    9.07    2.78
  10   5  -2    8.34    2.35
 -10  -5   2    4.49    3.32
 -10  -5   2    3.73    2.57
 -10  -5   2    2.81    1.94
   9   5  -2    4.60    2.32
   9   5  -2    5.56    2.20
   9   5  -2    4.43    1.79
   9   5  -2    4.42    2.17
  -9  -5   2    7.60    3.36
  -9  -5   2    5.14    2.33
  -9  -5   2    5.58    2.00
  -9  -5   2    3.66    2.30
   8   5  -2   21.62    3.26
   8   5  -2   24.37    3.07
   8   5  -2   27.58    2.41
   8   5  -2   22.81    2.96
  -8  -5   2   23.87    2.16
  -8  -5   2   20.50    2.55
  -8  -5   2   22.87    3.16
  -8  -5   2   23.20    3.27
  -8  -5   2   27.62    4.40
   7   5  -2    2.15    1.84
   7   5  -2    1.50    1.17
   7   5  -2    1.73    1.72
   7   5  -2   -0.65    1.65
  -7  -5   2   -0.42    1.34
  -7  -5   2   -0.14    1.73
  -7  -5   2    1.34    1.45
  -7  -5   2    0.47    1.40
  -7  -5   2   -0.83    1.05
   6   5  -2   13.59    2.33
   6   5  -2    9.53    1.51
   6   5  -2    9.15    1.37
   6   5  -2   10.08    2.03
   6   5  -2    8.69    2.27
  -6  -5   2   12.41    2.31
  -6  -5   2    9.74    1.36
  -6  -5   2    9.24    2.24
  -6  -5   2   11.88    2.81
  -6  -5   2   11.32    1.81
   5   5  -2   46.78    2.27
   5   5  -2   44.11    3.27
   5   5  -2   42.20    2.67
   5   5  -2   39.44    1.20
   5   5  -2   47.02    2.94
  -5  -5   2   39.26    2.60
  -5  -5   2   44.94    2.64
  -5  -5   2   39.67    2.04
  -5  -5   2   43.53    3.59
  -5  -5   2   40.07    3.11
   4   5  -2   18.67    1.71
   4   5  -2   15.58    2.21
   4   5  -2   15.06    2.11
  -4  -5   2   17.54    1.95
  -4  -5   2   16.77    1.43
  -4  -5   2   14.70    2.20
  -4  -5   2   17.09    2.76
  -4  -5   2   16.87    2.20
   3   5  -2    8.11    1.73
   3   5  -2    8.59    1.27
   3   5  -2    9.28    1.86
  -3  -5   2    7.75    1.46
  -3  -5   2    7.55    1.69
  -3  -5   2    8.55    1.77
  -3  -5   2    7.02    1.07
  -3  -5   2   10.03    2.20
   2   5  -2   17.56    1.68
   2   5  -2   16.63    1.90
   2   5  -2   15.17    1.92
  -2  -5   2   13.95    1.40
  -2  -5   2   14.51    1.74
  -2  -5   2   13.55    1.86
  -2  -5   2   15.35    2.30
   1   5  -2   56.39    2.75
   1   5  -2   60.16    2.68
   1   5  -2   56.13    2.46
   1   5  -2   58.36    2.75
   1   5  -2   61.25    1.80
  -1  -5   2   59.38    3.23
  -1  -5   2   58.56    1.80
  -1  -5   2   62.06    2.92
  -1  -5   2   57.30    2.71
  -1  -5   2   57.98    2.36
   0   5  -2   31.45    1.93
   0   5  -2   32.95    2.49
   0   5  -2   36.17    1.62
   0   5  -2   33.42    2.14
   0  -5   2   33.16    1.56
   0  -5   2   31.41    2.18
   0  -5   2   34.97    2.11
   0  -5   2   32.19    1.96
   0  -5   2   37.45    2.41
  -1   5  -2    7.40    1.20
  -1   5  -2    6.56    1.30
  -1   5  -2    7.28    1.10
  -1   5  -2    6.49    1.43
  -1   5  -2    7.23    1.82
   1  -5   2    7.26    1.14
   1  -5   2    8.03    1.46
   1  -5   2    7.67    1.35
   1  -5   2    9.01    1.26
   1  -5   2    7.45    1.56
  -2   5  -2   19.04    2.31
  -2   5  -2   15.69    1.56
  -2   5  -2   16.86    2.02
  -2   5  -2   17.44    1.69
  -2   5  -2   16.92    1.67
   2  -5   2   18.66    1.80
   2  -5   2   16.58    1.53
   2  -5   2   16.38    2.02
   2  -5   2   17.72    1.86
   2  -5   2   17.75    1.41
  -3   5  -2   -2.23    1.39
  -3   5  -2   -1.39    0.80
  -3   5  -2    0.56    1.00
  -3   5  -2    0.09    1.08
  -3   5  -2   -1.18    1.23
   3  -5   2    0.73    0.80
   3  -5   2   -0.31    0.94
   3  -5   2    0.14    1.02
   3  -5   2    1.38    0.69
   3  -5   2    0.15    1.44
  -4   5  -2    9.23    1.98
  -4   5  -2   11.16    1.83
  -4   5  -2   11.37    2.22
   4  -5   2   10.53    1.82
   4  -5   2    7.78    1.97
   4  -5   2   12.44    2.00
  -5   5  -2   19.73    2.70
  -5   5  -2   24.68    2.64
  -5   5  -2   20.36    2.64
   5  -5   2   21.00    2.50
   5  -5   2   23.04    2.73
   5  -5   2   21.57    2.39
  -6   5  -2    2.30    1.73
  -6   5  -2   -0.13    1.74
  -6   5  -2    3.11    1.88
   6  -5   2    0.27    1.85
   6  -5   2    0.08    1.61
   6  -5   2    0.37    1.78
  -7   5  -2    1.80    1.96
  -7   5  -2    2.12    1.79
  -7   5  -2    2.36    1.63
   7  -5   2    1.37    1.85
   7  -5   2   -0.52    1.94
   7  -5   2    1.61    1.48
  -8   5  -2    2.86    2.30
  -8   5  -2   -0.71    1.88
  -8   5  -2    7.13    2.61
   8  -5   2    5.09    2.09
   8  -5   2   -5.95    1.98
   8  -5   2    2.08    2.10
  11   4  -2   10.14    2.10
  11   4  -2    1.32    1.84
  11   4  -2    3.65    1.86
  11   4  -2   11.09    2.78
 -11  -4   2   -0.62    2.43
 -11  -4   2   -1.45    2.99
 -11  -4   2    1.41    2.21
  10   4  -2    2.33    1.90
  10   4  -2    2.30    1.93
  10   4  -2   11.14    3.03
  10   4  -2    0.27    1.59
  10   4  -2    0.63    2.17
 -10  -4   2    8.51    3.72
 -10  -4   2   -2.23    1.80
 -10  -4   2    1.33    2.25
 -10  -4   2    2.31    2.45
   9   4  -2    1.71    1.82
   9   4  -2    5.03    2.06
   9   4  -2    4.28    2.21
   9   4  -2    3.11    1.47
  -9  -4   2    2.46    2.85
  -9  -4   2    2.75    1.76
  -9  -4   2    4.74    2.21
  -9  -4   2    0.66    2.10
  -9  -4   2    3.15    1.53
   8   4  -2    7.22    1.62
   8   4  -2    7.11    1.57
   8   4  -2    6.30    1.99
   8   4  -2    5.15    2.09
   8   4  -2   11.41    2.56
  -8  -4   2    4.78    1.33
  -8  -4   2    5.11    2.27
  -8  -4   2    4.69    1.48
  -8  -4   2    9.20    3.06
  -8  -4   2    8.81    2.08
  -8  -4   2    6.96    2.30
   7   4  -2    1.02    1.15
   7   4  -2    1.77    1.04
   7   4  -2   -0.40    1.47
   7   4  -2   -0.09    1.56
   7   4  -2    0.65    1.30
  -7  -4   2    0.36    1.63
  -7  -4   2   -0.19    1.59
  -7  -4   2   -0.90    0.81
  -7  -4   2    0.23    1.27
  -7  -4   2    0.30    1.31
  -7  -4   2    0.65    1.04
   6   4  -2    7.89    2.00
   6   4  -2    7.80    1.36
   6   4  -2    9.11    1.14
   6   4  -2    5.55    1.48
   6   4  -2    6.00    1.79
  -6  -4   2   10.13    1.66
  -6  -4   2    7.33    1.94
  -6  -4   2    6.07    2.42
  -6  -4   2    7.96    1.22
  -6  -4   2    6.36    0.99
  -6  -4   2    3.74    1.79
   5   4  -2   28.47    2.17
   5   4  -2   31.59    2.41
   5   4  -2   29.02    1.77
   5   4  -2   29.86    1.33
  -5  -4   2   27.07    2.81
  -5  -4   2   32.11    2.15
  -5  -4   2   28.68    1.69
  -5  -4   2   28.61    2.17
  -5  -4   2   34.22    3.15
   4   4  -2  162.41    3.70
   4   4  -2  167.16    5.21
   4   4  -2  174.76    5.23
   4   4  -2  162.53    3.58
   4   4  -2  177.99    4.58
  -4  -4   2  176.28    5.67
  -4  -4   2  161.63    5.12
  -4  -4   2  172.52    4.31
  -4  -4   2  171.41    6.15
  -4  -4   2  168.61    4.91
   3   4  -2   61.47    2.77
   3   4  -2   66.87    3.02
   3   4  -2   67.08    2.52
  -3  -4   2   64.18    2.69
  -3  -4   2   65.85    2.96
  -3  -4   2   66.76    3.20
  -3  -4   2   63.71    2.20
  -3  -4   2   61.42    3.47
   2   4  -2   44.25    2.19
   2   4  -2   44.09    1.99
   2   4  -2   45.08    2.29
   2   4  -2   40.82    2.33
  -2  -4   2   46.23    2.15
  -2  -4   2   38.03    2.25
  -2  -4   2   44.66    1.85
  -2  -4   2   39.52    2.41
  -2  -4   2   44.01    2.81
   1   4  -2   84.70    2.85
   1   4  -2   86.88    2.13
   1   4  -2   78.72    3.07
   1   4  -2   81.47    2.98
  -1  -4   2   88.53    2.74
  -1  -4   2   85.51    3.19
  -1  -4   2   84.96    3.06
  -1  -4   2   80.46    2.10
  -1  -4   2   84.42    3.50
   0   4  -2   61.23    2.45
   0   4  -2   57.24    2.37
   0   4  -2   60.82    2.50
   0   4  -2   58.69    2.84
   0   4  -2   62.32    2.01
   0  -4   2   57.38    2.60
   0  -4   2   62.09    2.34
   0  -4   2   63.34    2.88
   0  -4   2   62.11    2.57
  -1   4  -2  103.66    3.14
  -1   4  -2   96.85    3.68
  -1   4  -2   99.87    3.23
  -1   4  -2  106.27    3.10
  -1   4  -2  103.86    3.48
   1  -4   2   99.48    3.27
   1  -4   2  102.13    3.17
   1  -4   2  103.41    3.47
   1  -4   2   97.33    3.51
  -2   4  -2   14.33    1.34
  -2   4  -2   14.69    1.93
  -2   4  -2   11.83    1.37
  -2   4  -2   14.76    1.78
  -2   4  -2   15.43    1.56
   2  -4   2   11.40    1.32
   2  -4   2   13.85    1.80
   2  -4   2   13.43    1.59
   2  -4   2   11.46    1.17
  -3   4  -2    3.41    1.37
  -3   4  -2    2.63    1.44
  -3   4  -2    1.87    0.79
  -3   4  -2    1.72    0.78
  -3   4  -2    2.59    1.16
   3  -4   2    3.55    0.89
   3  -4   2    1.92    0.97
   3  -4   2    2.64    1.39
   3  -4   2    2.85    0.72
  -4   4  -2   28.52    2.38
  -4   4  -2   23.59    1.33
  -4   4  -2   26.10    1.29
  -4   4  -2   25.83    2.35
  -4   4  -2   25.84    2.36
   4  -4   2   27.02    1.48
   4  -4   2   28.77    2.59
   4  -4   2   25.98    1.32
   4  -4   2   26.07    2.33
  -5   4  -2    6.13    1.76
  -5   4  -2    4.65    1.75
  -5   4  -2    2.88    1.53
   5  -4   2    4.92    1.66
   5  -4   2    2.83    1.68
   5  -4   2    3.52    1.51
  -6   4  -2    0.76    1.73
  -6   4  -2    0.66    1.58
  -6   4  -2    1.30    1.59
   6  -4   2    0.52    1.48
   6  -4   2   -1.41    1.11
   6  -4   2    0.45    1.80
  -7   4  -2    4.57    1.90
  -7   4  -2    0.32    1.73
  -7   4  -2    2.50    1.91
   7  -4   2    0.57    1.37
   7  -4   2   -2.95    2.09
   7  -4   2    1.81    1.73
  -8   4  -2    2.42    1.81
  -8   4  -2    2.08    2.02
  -8   4  -2    2.98    2.07
   8  -4   2    0.89    1.85
   8  -4   2   -1.74    2.18
   8  -4   2    1.08    1.83
  -9   4  -2    5.10    2.14
  -9   4  -2    3.34    2.30
  -9   4  -2    2.81    2.25
   9  -4   2    1.96    2.03
   9  -4   2   -0.26    1.94
   9  -4   2   -3.20    2.24
  11   3  -2    5.45    2.10
  11   3  -2    5.79    2.05
 -11  -3   2    2.90    2.09
 -11  -3   2    0.04    2.24
 -11  -3   2    0.00    3.30
 -11  -3   2    1.48    2.25
  10   3  -2    2.74    1.60
  10   3  -2   -2.26    1.32
  10   3  -2    6.81    1.72
  10   3  -2    3.26    1.93
  10   3  -2    4.32    1.86
  10   3  -2    2.34    1.66
  10   3  -2    0.38    1.94
  10   3  -2    8.01    2.61
 -10  -3   2   -0.88    1.45
 -10  -3   2    1.43    2.18
 -10  -3   2    4.36    2.08
 -10  -3   2   -0.15    1.93
 -10  -3   2    1.06    1.73
 -10  -3   2    0.66    1.41
 -10  -3   2    1.22    1.64
 -10  -3   2    1.87    3.05
   9   3  -2   31.83    3.02
   9   3  -2   23.83    2.63
   9   3  -2   26.35    3.30
   9   3  -2   23.71    3.69
   9   3  -2   27.52    2.60
   9   3  -2   35.43    3.13
   9   3  -2   34.99    2.68
  -9  -3   2   26.61    3.19
  -9  -3   2   24.88    2.38
  -9  -3   2   19.16    2.47
  -9  -3   2   24.43    2.60
  -9  -3   2   26.90    3.06
  -9  -3   2   22.18    2.35
  -9  -3   2   25.27    3.17
  -9  -3   2   30.60    4.38
   8   3  -2    3.18    1.91
   8   3  -2   10.32    2.20
   8   3  -2    6.38    1.47
   8   3  -2    5.71    1.51
   8   3  -2    5.19    1.72
   8   3  -2    4.33    2.03
  -8  -3   2    5.63    1.69
  -8  -3   2    4.20    1.36
  -8  -3   2    9.28    2.90
  -8  -3   2    5.47    1.49
  -8  -3   2    5.55    2.08
  -8  -3   2    3.27    1.60
  -8  -3   2    3.78    1.98
  -8  -3   2    3.61    1.79
   7   3  -2    2.24    1.63
   7   3  -2    6.55    1.81
   7   3  -2    5.49    1.88
   7   3  -2    4.10    1.45
   7   3  -2    6.14    1.35
  -7  -3   2    5.76    1.93
  -7  -3   2    3.05    1.12
  -7  -3   2    3.70    1.53
  -7  -3   2    4.20    1.82
  -7  -3   2    3.86    1.21
  -7  -3   2    6.58    2.47
  -7  -3   2    3.29    1.68
   6   3  -2    3.14    1.49
   6   3  -2    7.13    1.48
   6   3  -2    4.54    1.69
   6   3  -2    6.48    1.26
   6   3  -2    7.01    1.17
  -6  -3   2    4.04    1.38
  -6  -3   2    6.83    1.83
  -6  -3   2    3.72    1.03
  -6  -3   2    5.42    1.00
  -6  -3   2    2.44    1.22
  -6  -3   2    5.87    2.20
  -6  -3   2    6.34    1.65
   5   3  -2   27.19    1.50
   5   3  -2   25.22    1.88
   5   3  -2   23.98    2.16
   5   3  -2   26.78    1.80
  -5  -3   2   24.95    1.54
  -5  -3   2   27.36    2.46
  -5  -3   2   23.21    2.18
  -5  -3   2   25.88    1.84
  -5  -3   2   26.77    2.73
  -5  -3   2   23.09    1.80
  -5  -3   2   24.76    1.40
   4   3  -2   39.58    1.88
   4   3  -2   41.63    2.40
   4   3  -2   38.10    2.42
   4   3  -2   38.84    1.45
  -4  -3   2   39.32    2.05
  -4  -3   2   40.73    2.64
  -4  -3   2   39.23    2.91
  -4  -3   2   40.48    2.44
  -4  -3   2   36.08    1.63
   3   3  -2   93.28    3.42
   3   3  -2   93.40    2.11
   3   3  -2   91.04    2.11
   3   3  -2   96.78    2.88
   3   3  -2   86.94    3.16
  -3  -3   2   97.20    4.06
  -3  -3   2   93.76    2.56
  -3  -3   2   94.34    3.62
  -3  -3   2   98.39    3.46
  -3  -3   2   94.47    3.08
   2   3  -2   62.17    2.21
   2   3  -2   61.35    2.43
   2   3  -2   63.14    2.65
  -2  -3   2   62.90    1.93
  -2  -3   2   61.80    2.71
  -2  -3   2   61.99    2.29
  -2  -3   2   61.72    3.04
  -2  -3   2   59.34    2.38
   1   3  -2  339.32    7.71
   1   3  -2  342.89    7.54
   1   3  -2  343.93    6.81
   1   3  -2  341.76    7.91
   1   3  -2  334.17    7.91
  -1  -3   2  347.26    7.27
  -1  -3   2  345.66    7.71
  -1  -3   2  332.67    7.93
  -1  -3   2  340.21    7.71
  -1  -3   2  341.24    8.37
  -1  -3   2  322.24    6.80
   0   3  -2    3.64    0.93
   0   3  -2    4.61    0.94
   0   3  -2    4.94    1.32
   0   3  -2    4.03    0.69
   0   3  -2    5.14    1.10
   0  -3   2    3.62    1.14
   0  -3   2    4.20    0.98
   0  -3   2    5.17    0.86
   0  -3   2    4.23    0.96
  -1   3  -2    3.33    1.09
  -1   3  -2    3.81    0.98
  -1   3  -2    4.56    0.87
  -1   3  -2    4.69    0.94
  -1   3  -2    5.54    1.35
   1  -3   2    5.14    1.12
   1  -3   2    5.58    1.31
   1  -3   2    5.69    1.03
   1  -3   2    5.50    0.96
  -2   3  -2   -1.55    1.01
  -2   3  -2    1.66    0.91
  -2   3  -2    1.27    0.91
  -2   3  -2    0.32    1.16
  -2   3  -2    1.60    0.74
   2  -3   2   -0.01    0.83
   2  -3   2    0.23    1.15
   2  -3   2    0.09    0.93
   2  -3   2    0.03    0.73
  -3   3  -2   12.72    1.54
  -3   3  -2   11.35    1.11
  -3   3  -2   11.25    0.84
  -3   3  -2   15.05    1.79
  -3   3  -2   12.45    1.71
   3  -3   2   12.31    1.56
   3  -3   2   11.28    1.24
   3  -3   2   13.32    1.19
   3  -3   2   12.70    1.70
  -4   3  -2   15.81    1.86
  -4   3  -2   12.88    1.70
  -4   3  -2   15.08    1.99
  -4   3  -2   13.34    1.15
  -4   3  -2   15.54    0.87
   4  -3   2   11.67    1.66
   4  -3   2   16.38    1.94
   4  -3   2   14.04    1.29
   4  -3   2   12.82    1.39
  -5   3  -2   22.08    2.31
  -5   3  -2   22.56    1.28
  -5   3  -2   21.82    2.39
  -5   3  -2   18.59    1.38
  -5   3  -2   19.66    2.17
   5  -3   2   24.29    2.46
   5  -3   2   20.52    1.37
   5  -3   2   19.03    2.12
   5  -3   2   17.55    1.59
   5  -3   2   15.32    1.70
  -6   3  -2    3.67    1.80
  -6   3  -2    6.14    1.79
  -6   3  -2    9.63    2.03
   6  -3   2    4.14    1.86
   6  -3   2    6.69    1.50
  -7   3  -2    7.15    2.04
  -7   3  -2    6.57    1.93
  -7   3  -2    8.19    2.15
   7  -3   2    4.08    1.82
   7  -3   2    2.23    2.09
   7  -3   2    4.12    1.85
  -8   3  -2    2.34    1.93
  -8   3  -2    2.94    1.67
  -8   3  -2    3.00    2.03
   8  -3   2    0.11    1.34
   8  -3   2    1.31    1.80
   8  -3   2   -1.98    1.78
  -9   3  -2    2.02    1.62
  -9   3  -2    1.96    1.98
  -9   3  -2    2.48    1.77
   9  -3   2    0.57    2.01
   9  -3   2    0.19    1.83
   9  -3   2    2.04    1.80
  11   2  -2    1.64    1.85
  11   2  -2    2.46    1.75
  11   2  -2   14.56    2.38
 -11  -2   2    0.87    2.36
 -11  -2   2    4.11    2.42
 -11  -2   2   -1.12    1.63
 -11  -2   2   -0.89    1.72
  10   2  -2    2.01    1.92
  10   2  -2    7.97    2.21
  10   2  -2    4.15    1.70
  10   2  -2    4.48    2.00
  10   2  -2    6.71    2.03
  10   2  -2    9.89    2.45
  10   2  -2    4.26    1.75
  10   2  -2    6.95    2.28
 -10  -2   2    3.35    1.96
 -10  -2   2    0.32    1.71
 -10  -2   2    3.43    1.88
 -10  -2   2    2.42    2.64
 -10  -2   2    2.75    1.93
 -10  -2   2   -0.12    2.08
 -10  -2   2    4.94    2.42
 -10  -2   2    3.68    2.04
   9   2  -2    6.60    2.00
   9   2  -2    8.41    2.33
   9   2  -2    8.23    1.95
   9   2  -2    6.26    1.62
   9   2  -2    4.74    1.88
   9   2  -2    6.57    1.70
   9   2  -2    0.70    1.66
   9   2  -2    7.40    1.94
  -9  -2   2    3.38    1.84
  -9  -2   2    8.93    2.88
  -9  -2   2    2.52    1.57
  -9  -2   2    6.46    2.17
  -9  -2   2    2.52    1.69
  -9  -2   2    2.68    1.89
  -9  -2   2    5.59    1.70
  -9  -2   2    4.39    1.72
   8   2  -2   21.95    2.71
   8   2  -2   24.20    2.47
   8   2  -2   19.17    2.15
   8   2  -2   22.30    2.48
   8   2  -2   24.41    2.22
   8   2  -2   21.90    2.76
   8   2  -2   17.90    2.47
  -8  -2   2   23.51    3.56
  -8  -2   2   25.49    2.90
  -8  -2   2   16.66    2.21
  -8  -2   2   16.38    2.10
  -8  -2   2   19.08    2.53
  -8  -2   2   18.49    2.62
  -8  -2   2   22.98    2.30
  -8  -2   2   18.43    1.97
   7   2  -2    1.54    1.46
   7   2  -2    3.85    1.54
   7   2  -2    2.43    1.19
   7   2  -2    1.28    1.27
   7   2  -2    1.06    0.94
  -7  -2   2    1.75    1.87
  -7  -2   2    0.00    1.17
  -7  -2   2   -0.17    1.36
  -7  -2   2    1.37    1.49
  -7  -2   2    1.65    1.07
  -7  -2   2   -0.54    1.12
  -7  -2   2    1.11    1.01
  -7  -2   2    1.77    1.47
   6   2  -2   20.08    1.75
   6   2  -2   20.00    2.24
   6   2  -2   19.48    1.92
   6   2  -2   19.72    2.39
  -6  -2   2   20.51    1.69
  -6  -2   2   17.35    1.80
  -6  -2   2   19.37    2.20
  -6  -2   2   23.93    2.33
  -6  -2   2   20.96    2.83
  -6  -2   2   19.34    2.08
  -6  -2   2   17.99    1.64
  -6  -2   2   20.92    1.96
   5   2  -2   78.58    3.32
   5   2  -2   81.43    2.74
   5   2  -2   85.33    3.08
  -5  -2   2   79.20    3.92
  -5  -2   2   80.89    2.91
  -5  -2   2   80.29    3.55
  -5  -2   2   78.63    2.99
  -5  -2   2   79.11    2.66
  -5  -2   2   84.57    3.38
  -5  -2   2   80.02    3.26
  -5  -2   2   83.15    2.67
   4   2  -2  148.21    4.05
   4   2  -2  145.30    3.65
   4   2  -2  134.76    4.42
   4   2  -2  144.28    4.41
  -4  -2   2  144.42    3.58
  -4  -2   2  141.98    3.95
  -4  -2   2  141.40    4.31
  -4  -2   2  138.84    3.59
  -4  -2   2  139.60    4.38
  -4  -2   2  145.30    4.67
  -4  -2   2  141.13    5.03
   3   2  -2    0.08    1.04
   3   2  -2   -0.12    0.72
   3   2  -2    0.68    0.97
   3   2  -2    0.97    0.51
  -3  -2   2    1.81    0.92
  -3  -2   2    0.72    1.04
  -3  -2   2    0.52    1.04
  -3  -2   2    1.37    0.86
  -3  -2   2    0.76    0.78
  -3  -2   2    1.05    0.52
   2   2  -2    4.95    1.18
   2   2  -2    3.91    0.42
   2   2  -2    4.66    0.88
   2   2  -2    3.78    0.42
  -2  -2   2    4.26    0.89
  -2  -2   2    3.42    0.52
  -2  -2   2    4.73    1.15
  -2  -2   2    3.86    0.41
  -2  -2   2    5.33    1.46
  -2  -2   2    3.87    1.11
   1   2  -2   13.76    1.36
   1   2  -2   15.86    0.67
   1   2  -2   14.04    1.26
   1   2  -2   15.54    1.43
   1   2  -2   16.76    1.22
  -1  -2   2   16.14    1.64
  -1  -2   2   14.13    1.42
  -1  -2   2   14.90    0.84
  -1  -2   2   14.99    0.65
  -1  -2   2   15.77    1.28
  -1  -2   2   13.64    1.18
   0   2  -2  180.11    4.52
   0   2  -2  180.86    4.50
   0   2  -2  183.10    4.00
   0   2  -2  180.70    4.41
   0   2  -2  179.91    4.17
   0  -2   2  179.29    4.44
   0  -2   2  182.92    4.12
   0  -2   2  179.85    4.16
   0  -2   2  175.20    4.45
   0  -2   2  176.04    4.71
  -1   2  -2   42.85    1.82
  -1   2  -2   41.85    1.89
  -1   2  -2   42.23    1.37
  -1   2  -2   41.32    1.89
  -1   2  -2   43.10    1.64
   1  -2   2   42.55    1.91
   1  -2   2   44.07    1.96
   1  -2   2   43.75    1.74
   1  -2   2   41.49    1.76
  -2   2  -2   46.21    1.99
  -2   2  -2   47.89    2.06
  -2   2  -2   46.06    1.30
  -2   2  -2   47.63    2.17
  -2   2  -2   48.43    1.88
   2  -2   2   49.77    1.89
   2  -2   2   46.90    2.03
   2  -2   2   48.77    2.06
   2  -2   2   44.67    1.27
   2  -2   2   47.58    2.21
  -3   2  -2   -0.44    0.91
  -3   2  -2   -0.19    0.70
  -3   2  -2   -0.10    0.35
  -3   2  -2   -0.74    1.05
  -3   2  -2    0.16    0.97
   3  -2   2   -0.80    1.09
   3  -2   2    0.05    0.43
   3  -2   2    0.26    0.87
   3  -2   2   -1.06    0.92
   3  -2   2    0.93    1.05
  -4   2  -2   30.79    1.63
  -4   2  -2   32.80    2.11
  -4   2  -2   32.37    1.14
  -4   2  -2   29.97    2.02
  -4   2  -2   33.16    2.03
   4  -2   2   30.61    1.84
   4  -2   2   31.68    2.00
   4  -2   2   33.67    2.16
   4  -2   2   33.64    2.16
  -5   2  -2    1.12    1.10
  -5   2  -2   -0.12    1.14
  -5   2  -2    1.63    0.82
  -5   2  -2    0.22    0.52
  -5   2  -2    0.93    1.03
   5  -2   2   -1.57    1.22
   5  -2   2   -0.23    1.29
   5  -2   2    0.69    0.78
   5  -2   2   -2.30    0.99
   5  -2   2    0.16    1.18
  -6   2  -2   10.99    1.91
  -6   2  -2   11.86    2.04
  -6   2  -2   14.63    1.97
   6  -2   2   10.56    1.62
   6  -2   2   13.82    2.03
   6  -2   2    8.97    1.79
   6  -2   2   12.03    2.03
   6  -2   2   12.64    2.10
  -7   2  -2    7.62    2.05
  -7   2  -2    7.59    1.78
  -7   2  -2    6.05    1.89
   7  -2   2    5.41    1.80
   7  -2   2    4.92    1.86
  -8   2  -2   12.00    2.45
  -8   2  -2   13.69    2.25
  -8   2  -2   16.20    2.41
   8  -2   2   13.14    2.31
   8  -2   2   10.25    2.28
   8  -2   2   11.76    2.32
  -9   2  -2    9.53    2.46
  -9   2  -2    8.67    2.42
  -9   2  -2   11.51    2.42
   9  -2   2    8.53    2.18
   9  -2   2    6.40    2.49
   9  -2   2    8.82    2.32
 -10   2  -2    0.61    2.19
 -10   2  -2    5.69    2.27
  10  -2   2   -4.04    1.72
  10  -2   2   -0.90    1.67
  10  -2   2   -0.58    2.31
  11   1  -2   -0.28    1.63
  11   1  -2    4.85    1.82
  11   1  -2    2.23    1.86
  11   1  -2    1.56    1.93
 -11  -1   2    2.16    1.95
 -11  -1   2   -1.78    1.85
 -11  -1   2    1.33    1.81
  10   1  -2    4.80    1.95
  10   1  -2    1.02    2.03
  10   1  -2    2.12    1.80
  10   1  -2   -0.15    1.59
  10   1  -2    4.80    2.12
  10   1  -2   14.45    3.92
 -10  -1   2    2.28    2.26
 -10  -1   2   -0.38    1.78
 -10  -1   2    1.16    1.88
 -10  -1   2    0.75    1.69
   9   1  -2    8.89    2.09
   9   1  -2    8.09    2.01
   9   1  -2   11.34    2.05
   9   1  -2    6.89    1.93
   9   1  -2    4.42    1.71
   9   1  -2   12.40    2.54
   9   1  -2   10.21    2.22
  -9  -1   2    8.46    2.07
  -9  -1   2    7.90    2.18
  -9  -1   2    8.52    2.21
  -9  -1   2    7.57    2.06
  -9  -1   2    5.83    1.83
  -9  -1   2    4.90    2.03
  -9  -1   2   10.90    2.20
  -9  -1   2    9.31    2.69
   8   1  -2    5.57    1.71
   8   1  -2    7.23    1.72
   8   1  -2    6.60    1.46
   8   1  -2    6.23    1.77
   8   1  -2    7.94    1.72
   8   1  -2    8.51    2.19
  -8  -1   2    6.83    1.70
  -8  -1   2    8.25    2.02
  -8  -1   2    7.59    1.89
  -8  -1   2    8.21    2.39
  -8  -1   2    5.23    1.72
  -8  -1   2    8.81    1.96
  -8  -1   2   10.06    1.90
  -8  -1   2    7.70    1.75
   7   1  -2   -1.05    1.11
   7   1  -2    0.39    1.29
   7   1  -2    1.07    1.29
   7   1  -2    1.98    1.47
   7   1  -2    0.75    1.24
  -7  -1   2   -1.83    1.14
  -7  -1   2   -0.91    1.73
  -7  -1   2    2.33    1.54
  -7  -1   2    0.72    1.20
  -7  -1   2    1.10    1.44
  -7  -1   2    0.07    1.27
  -7  -1   2   -1.52    1.30
  -7  -1   2   -0.09    1.12
   6   1  -2   16.02    1.54
   6   1  -2   18.45    1.98
   6   1  -2   15.65    1.94
   6   1  -2   17.87    1.78
  -6  -1   2   19.05    2.18
  -6  -1   2   15.51    1.66
  -6  -1   2   14.38    1.48
  -6  -1   2   15.41    1.82
  -6  -1   2   18.00    1.73
  -6  -1   2   14.59    1.98
  -6  -1   2   19.21    2.09
  -6  -1   2   17.88    2.57
   5   1  -2   65.72    2.43
   5   1  -2   68.07    2.79
   5   1  -2   59.44    2.81
   5   1  -2   61.23    2.93
   5   1  -2   60.28    2.56
  -5  -1   2   62.66    2.72
  -5  -1   2   64.19    3.09
  -5  -1   2   62.75    2.86
  -5  -1   2   64.02    2.50
  -5  -1   2   63.71    2.67
  -5  -1   2   66.91    2.43
  -5  -1   2   67.06    2.56
  -5  -1   2   66.41    3.47
   4   1  -2    7.46    1.05
   4   1  -2    8.92    1.31
   4   1  -2    7.55    1.31
   4   1  -2    6.35    1.42
  -4  -1   2    9.02    1.03
  -4  -1   2    7.96    1.70
  -4  -1   2    6.40    1.07
  -4  -1   2    8.61    1.47
  -4  -1   2    6.43    1.35
  -4  -1   2    8.46    1.46
  -4  -1   2    8.67    0.97
  -4  -1   2    8.06    1.23
   3   1  -2   82.25    2.61
   3   1  -2   81.08    2.86
   3   1  -2   76.36    2.85
   3   1  -2   82.93    2.38
  -3  -1   2   84.03    2.63
  -3  -1   2   83.30    2.34
  -3  -1   2   78.38    2.18
  -3  -1   2   82.36    2.84
  -3  -1   2   80.37    2.42
  -3  -1   2   81.47    2.86
  -3  -1   2   86.68    2.97
  -3  -1   2   80.76    3.22
   2   1  -2   17.41    1.46
   2   1  -2   19.08    0.91
   2   1  -2   18.71    1.23
   2   1  -2   16.06    1.43
   2   1  -2   18.56    0.76
  -2  -1   2   18.10    1.40
  -2  -1   2   19.33    1.06
  -2  -1   2   20.17    1.25
  -2  -1   2   18.76    0.76
  -2  -1   2   17.52    1.66
  -2  -1   2   21.07    1.54
   1   1  -2   47.17    1.12
   1   1  -2   47.01    1.82
   1   1  -2   48.33    1.70
   1   1  -2   50.00    1.31
  -1  -1   2   46.12    1.12
  -1  -1   2   46.99    1.29
  -1  -1   2   46.64    1.56
  -1  -1   2   44.59    1.91
  -1  -1   2   45.36    2.13
  -1  -1   2   48.42    1.77
   0   1  -2  325.46    6.73
   0   1  -2  325.90    7.00
   0   1  -2  335.80    7.19
   0   1  -2  335.08    7.04
   0  -1   2  317.80    7.36
   0  -1   2  330.96    6.67
   0  -1   2  325.62    6.99
   0  -1   2  327.97    7.17
   0  -1   2  331.54    6.80
  -1   1  -2    1.41    0.36
  -1   1  -2    2.05    0.66
  -1   1  -2    2.89    0.88
  -1   1  -2    0.47    0.63
  -1   1  -2    1.08    0.32
  -1   1  -2    1.62    0.84
  -1   1  -2    1.49    0.66
   1  -1   2    1.88    0.66
   1  -1   2    5.10    1.01
   1  -1   2    2.80    0.98
   1  -1   2    2.58    0.80
  -2   1  -2  389.07    8.29
  -2   1  -2  397.44    8.39
  -2   1  -2  375.43    8.26
  -2   1  -2  383.29    8.42
   2  -1   2  388.01    8.40
   2  -1   2  389.65    8.48
   2  -1   2  391.55    8.59
   2  -1   2  390.70    8.32
  -3   1  -2   47.16    1.94
  -3   1  -2   45.43    2.16
  -3   1  -2   42.42    1.87
  -3   1  -2   45.96    1.21
  -3   1  -2   45.76    2.12
  -3   1  -2   45.33    1.94
   3  -1   2   41.27    1.89
   3  -1   2   46.34    2.18
   3  -1   2   44.39    1.23
   3  -1   2   46.44    2.01
   3  -1   2   51.18    2.23
  -4   1  -2   28.93    1.94
  -4   1  -2   28.64    1.96
  -4   1  -2   30.60    1.17
  -4   1  -2   30.27    1.76
  -4   1  -2   26.48    1.65
  -4   1  -2   24.63    1.91
   4  -1   2   27.31    1.95
   4  -1   2   29.88    2.04
   4  -1   2   28.18    1.93
   4  -1   2   28.73    1.77
  -5   1  -2   82.33    2.43
  -5   1  -2   81.72    3.12
  -5   1  -2   83.06    3.24
  -5   1  -2   86.99    3.19
  -5   1  -2   80.19    3.31
  -5   1  -2   81.37    3.00
   5  -1   2   85.68    3.14
   5  -1   2   82.46    3.04
   5  -1   2   84.21    3.42
   5  -1   2   85.74    3.33
   5  -1   2   85.08    3.20
  -6   1  -2   36.80    2.58
  -6   1  -2   29.99    2.13
  -6   1  -2   32.65    2.47
  -6   1  -2   30.22    2.07
  -6   1  -2   31.93    1.62
   6  -1   2   33.06    2.59
   6  -1   2   33.35    2.42
   6  -1   2   28.90    2.26
   6  -1   2   31.79    2.09
   6  -1   2   35.88    1.59
   6  -1   2   37.19    2.49
  -7   1  -2    7.21    1.79
  -7   1  -2    7.66    1.75
  -7   1  -2    5.56    1.77
  -7   1  -2    3.73    1.66
   7  -1   2    4.52    1.90
   7  -1   2    4.79    1.62
   7  -1   2    4.29    1.57
   7  -1   2    5.61    1.80
  -8   1  -2   14.57    2.39
  -8   1  -2   23.57    2.77
  -8   1  -2   21.05    2.50
  -8   1  -2   21.73    2.76
   8  -1   2   16.92    2.40
   8  -1   2   20.96    2.80
  -9   1  -2    1.77    1.93
  -9   1  -2    3.80    1.92
  -9   1  -2    0.54    1.53
   9  -1   2    2.76    1.95
   9  -1   2    0.12    1.31
   9  -1   2    0.44    1.59
 -10   1  -2    3.17    2.04
 -10   1  -2    7.84    2.51
  10  -1   2    0.58    1.99
  10  -1   2    3.37    2.18
  10  -1   2    1.77    1.93
  11   0  -2    7.07    2.21
  11   0  -2   -0.27    1.63
  10   0  -2    3.50    1.91
  10   0  -2    4.46    2.12
  10   0  -2    0.91    1.66
 -10   0   2    2.50    1.98
 -10   0   2    2.67    1.85
 -10   0   2    5.81    3.28
 -10   0   2    2.18    2.22
   9   0  -2    1.29    1.64
   9   0  -2    3.81    1.82
   9   0  -2    6.47    2.59
   9   0  -2    2.14    1.75
   9   0  -2    3.18    1.62
  -9   0   2    0.63    1.79
  -9   0   2    2.00    1.64
  -9   0   2    0.99    1.60
  -9   0   2    1.75    1.76
   8   0  -2    9.66    2.01
   8   0  -2    6.95    1.85
   8   0  -2    8.30    1.92
   8   0  -2   11.28    2.28
   8   0  -2    6.07    1.59
   8   0  -2    7.34    1.70
  -8   0   2    8.49    2.44
  -8   0   2    6.67    1.76
  -8   0   2    9.26    1.94
  -8   0   2    8.87    2.13
  -8   0   2    6.56    1.88
  -8   0   2    7.16    1.87
  -8   0   2    7.06    1.70
   7   0  -2    5.17    1.35
   7   0  -2    1.60    1.37
   7   0  -2    2.46    1.43
   7   0  -2    7.29    1.72
   7   0  -2    3.46    1.37
  -7   0   2    3.94    1.53
  -7   0   2    5.83    1.78
  -7   0   2    3.18    1.43
  -7   0   2    4.50    1.45
  -7   0   2    2.55    1.21
  -7   0   2    2.63    1.80
  -7   0   2    5.92    1.67
  -7   0   2    4.02    1.65
   6   0  -2   11.86    1.69
   6   0  -2   12.20    1.68
   6   0  -2   10.48    1.52
   6   0  -2   11.70    1.46
   6   0  -2   11.07    1.55
   6   0  -2   10.02    1.37
  -6   0   2   11.03    1.56
  -6   0   2   11.48    1.72
  -6   0   2    9.18    1.37
  -6   0   2   12.04    2.06
  -6   0   2   10.22    1.62
  -6   0   2   10.22    1.40
  -6   0   2    9.51    1.50
  -6   0   2   14.61    1.98
   5   0  -2    9.88    1.39
   5   0  -2   10.47    1.53
   5   0  -2    8.45    1.18
   5   0  -2    8.55    1.17
   5   0  -2    9.01    1.48
   5   0  -2    9.81    1.46
  -5   0   2    8.49    1.44
  -5   0   2    9.64    1.35
  -5   0   2   11.07    1.54
  -5   0   2    9.71    1.21
  -5   0   2    7.39    1.53
  -5   0   2   11.04    1.88
  -5   0   2    8.82    1.42
  -5   0   2    9.18    1.22
   4   0  -2   11.07    1.33
   4   0  -2   11.01    1.31
   4   0  -2   10.78    1.30
   4   0  -2   11.32    1.17
  -4   0   2   11.96    1.15
  -4   0   2   11.85    1.69
  -4   0   2   12.99    1.67
  -4   0   2   13.80    1.41
  -4   0   2   10.76    1.35
  -4   0   2   10.54    1.12
  -4   0   2   11.89    1.41
  -4   0   2   10.53    1.44
   3   0  -2   31.09    1.38
   3   0  -2   31.41    1.71
   3   0  -2   31.81    1.56
   3   0  -2   32.65    1.71
  -3   0   2   31.40    1.68
  -3   0   2   31.80    1.89
  -3   0   2   32.71    1.75
  -3   0   2   31.73    1.52
  -3   0   2   31.91    1.82
  -3   0   2   30.90    1.36
  -3   0   2   31.78    1.37
  -3   0   2   28.14    1.64
   2   0  -2   95.89    2.51
   2   0  -2   93.28    2.70
   2   0  -2   94.53    2.24
   2   0  -2   91.35    2.82
  -2   0   2   93.12    2.78
  -2   0   2   95.97    2.81
  -2   0   2   94.12    2.23
  -2   0   2   93.83    2.26
  -2   0   2   90.93    2.75
  -2   0   2   97.21    2.71
  -2   0   2   94.75    3.01
   1   0  -2    0.94    0.52
   1   0  -2   -0.27    0.53
   1   0  -2    0.50    0.23
  -1   0   2   -1.19    0.41
  -1   0   2   -2.00    0.73
  -1   0   2   -1.08    0.74
  -1   0   2   -0.19    0.23
   0   0  -2    3.43    0.59
   0   0  -2    4.81    0.68
   0   0  -2    3.24    0.56
   0   0  -2    3.43    0.56
   0   0  -2    4.13    0.54
   0   0  -2    3.87    0.36
   0   0   2    2.84    0.36
   0   0   2    5.71    0.64
   0   0   2    3.11    0.57
   0   0   2    3.91    0.55
   0   0   2    2.20    0.61
   0   0   2    3.60    1.02
   0   0   2    6.27    0.90
  -1   0  -2  102.50    2.79
  -1   0  -2   99.51    2.62
  -1   0  -2   99.01    2.50
  -1   0  -2  100.57    2.35
  -1   0  -2   97.69    2.21
   1   0   2  100.25    2.22
   1   0   2  105.75    3.04
   1   0   2  112.46    2.97
   1   0   2  107.11    2.68
   1   0   2   98.86    2.34
  -2   0  -2   12.51    1.14
  -2   0  -2   14.59    0.86
  -2   0  -2   14.84    1.15
  -2   0  -2   14.74    0.98
  -2   0  -2   14.33    1.13
   2   0   2   14.09    0.67
   2   0   2   14.40    0.65
   2   0   2   16.08    1.29
   2   0   2   12.31    1.41
   2   0   2   16.03    1.34
  -3   0  -2  125.57    3.62
  -3   0  -2  130.33    3.31
  -3   0  -2  128.54    2.99
  -3   0  -2  134.74    3.68
  -3   0  -2  127.08    3.58
  -3   0  -2  127.68    3.57
   3   0   2  132.66    3.68
   3   0   2  129.45    3.64
   3   0   2  129.96    2.99
   3   0   2  132.53    3.67
   3   0   2  128.16    3.91
  -4   0  -2   10.07    1.20
  -4   0  -2    8.75    1.33
  -4   0  -2    9.51    0.94
  -4   0  -2    9.27    1.31
  -4   0  -2    8.78    1.19
  -4   0  -2    9.97    1.32
   4   0   2    9.28    1.36
   4   0   2    8.77    0.92
   4   0   2    9.72    1.29
   4   0   2    9.74    1.53
   4   0   2    8.69    1.29
   4   0   2   10.39    1.32
  -5   0  -2   13.52    1.21
  -5   0  -2    9.78    1.46
  -5   0  -2   11.60    1.58
  -5   0  -2   13.34    1.62
  -5   0  -2   12.47    1.39
   5   0   2   12.31    1.63
   5   0   2   14.18    1.67
   5   0   2   12.22    1.12
   5   0   2    9.75    1.45
   5   0   2   11.88    1.52
   5   0   2   11.97    1.75
  -6   0  -2    6.33    1.44
  -6   0  -2    6.03    1.08
  -6   0  -2    4.06    1.19
  -6   0  -2    5.23    1.24
  -6   0  -2    7.05    1.38
  -6   0  -2    4.34    1.45
   6   0   2    4.49    1.43
   6   0   2    6.81    1.75
   6   0   2    2.38    1.32
   6   0   2    6.99    1.08
   6   0   2    4.37    1.22
   6   0   2    3.98    1.12
  -7   0  -2    3.24    1.16
  -7   0  -2    5.73    1.41
  -7   0  -2    4.84    1.57
  -7   0  -2    4.47    1.64
  -7   0  -2    4.35    1.56
   7   0   2    5.94    1.19
   7   0   2    4.10    1.55
   7   0   2    4.45    1.86
   7   0   2    1.85    1.38
   7   0   2    4.60    1.65
  -8   0  -2    0.80    1.66
  -8   0  -2    2.78    1.62
  -8   0  -2    1.42    1.32
  -8   0  -2    1.45    1.32
   8   0   2   -1.00    1.43
   8   0   2    1.58    1.96
   8   0   2   -1.53    1.42
   8   0   2   -0.60    1.51
  -9   0  -2   12.95    2.41
  -9   0  -2   15.63    2.41
  -9   0  -2   13.89    2.38
  -9   0  -2   15.46    2.55
   9   0   2   13.46    2.42
   9   0   2    8.53    2.06
 -10   0  -2    1.26    1.96
 -10   0  -2    3.59    2.07
 -10   0  -2    1.89    1.94
  10   0   2    2.29    1.84
  10   0   2    0.90    2.15
  10   0   2    1.13    1.78
  10  -1  -2    0.36    1.72
  10  -1  -2    0.73    2.01
  10  -1  -2    4.90    1.86
 -10   1   2    1.07    1.95
 -10   1   2    0.14    1.91
 -10   1   2    0.08    1.83
   9  -1  -2    0.59    1.82
   9  -1  -2    0.72    1.59
  -9   1   2    1.85    1.79
  -9   1   2    1.56    1.85
  -9   1   2    3.92    1.97
  -9   1   2    3.64    1.95
   8  -1  -2    6.42    1.90
   8  -1  -2    7.01    1.71
   8  -1  -2    7.70    1.79
   8  -1  -2   10.83    2.38
  -8   1   2   12.25    2.32
  -8   1   2    8.79    2.05
  -8   1   2   11.68    2.15
  -8   1   2    8.99    2.22
   7  -1  -2   10.12    1.84
   7  -1  -2    6.61    1.55
   7  -1  -2    9.56    1.81
   7  -1  -2    7.10    1.46
   7  -1  -2    6.41    1.51
   7  -1  -2    6.04    1.74
  -7   1   2    5.81    1.84
  -7   1   2    6.26    1.85
  -7   1   2    7.02    1.57
  -7   1   2    7.83    1.52
  -7   1   2    5.97    1.78
  -7   1   2    7.01    1.68
   6  -1  -2    1.19    0.82
   6  -1  -2    1.31    1.00
   6  -1  -2   -0.06    1.15
   6  -1  -2    0.53    0.92
   6  -1  -2   -0.35    1.00
  -6   1   2    0.61    1.20
  -6   1   2   -2.13    1.17
  -6   1   2    1.17    1.34
  -6   1   2   -1.91    1.03
  -6   1   2   -0.19    0.97
  -6   1   2   -0.51    1.28
   5  -1  -2   22.11    1.70
   5  -1  -2   24.08    1.53
   5  -1  -2   23.99    1.63
   5  -1  -2   23.05    1.68
   5  -1  -2   23.74    1.95
  -5   1   2   24.45    1.94
  -5   1   2   21.70    1.75
  -5   1   2   22.58    1.69
  -5   1   2   21.05    1.82
  -5   1   2   22.21    2.00
  -5   1   2   19.65    1.68
   4  -1  -2  151.70    4.15
   4  -1  -2  156.73    4.47
   4  -1  -2  157.51    3.92
   4  -1  -2  156.24    4.16
  -4   1   2  161.38    4.23
  -4   1   2  150.57    4.37
  -4   1   2  155.17    4.49
  -4   1   2  155.16    4.37
  -4   1   2  153.22    4.55
  -4   1   2  158.47    4.57
   3  -1  -2   28.55    1.44
   3  -1  -2   25.80    1.36
   3  -1  -2   26.40    1.66
   3  -1  -2   26.83    1.20
  -3   1   2   27.65    1.43
  -3   1   2   24.50    1.62
  -3   1   2   27.00    1.61
  -3   1   2   27.81    1.61
  -3   1   2   27.12    1.22
  -3   1   2   28.80    1.73
  -3   1   2   25.96    1.76
   2  -1  -2   28.79    1.34
   2  -1  -2   28.38    1.28
   2  -1  -2   30.57    1.50
   2  -1  -2   28.64    0.96
   2  -1  -2   30.39    0.97
  -2   1   2   27.09    1.50
  -2   1   2   28.04    1.30
  -2   1   2   30.40    1.63
  -2   1   2   29.69    1.54
  -2   1   2   28.18    1.51
   1  -1  -2    0.34    0.74
   1  -1  -2    3.21    0.77
   1  -1  -2    2.12    0.73
   1  -1  -2    3.08    0.52
  -1   1   2    3.47    0.77
  -1   1   2    2.66    0.85
  -1   1   2    1.28    0.80
  -1   1   2    1.81    0.72
  -1   1   2    0.27    0.86
   0  -1  -2  394.78    7.99
   0  -1  -2  398.20    7.74
   0  -1  -2  391.67    7.82
   0  -1  -2  394.76    7.90
   0  -1  -2  380.05    7.87
   0  -1  -2  401.22    8.15
   0   1   2  400.62    8.07
   0   1   2  403.69    7.97
   0   1   2  381.08    7.73
   0   1   2  392.25    7.88
   0   1   2  387.89    8.12
   0   1   2  385.79    7.74
   0   1   2  380.51    8.30
  -1  -1  -2    9.64    0.87
  -1  -1  -2    8.23    0.77
  -1  -1  -2   10.19    0.80
  -1  -1  -2    9.74    0.90
   1   1   2   12.00    0.90
   1   1   2   11.58    1.42
   1   1   2    6.15    0.88
   1   1   2   10.96    0.80
   1   1   2   13.04    1.26
  -2  -1  -2  106.93    2.40
  -2  -1  -2  107.65    2.91
  -2  -1  -2  111.21    3.16
  -2  -1  -2  107.10    2.69
  -2  -1  -2  114.16    2.97
   2   1   2  115.24    2.99
   2   1   2  111.66    2.74
   2   1   2  108.72    2.41
   2   1   2  110.45    3.43
   2   1   2  112.76    3.22
  -3  -1  -2  225.75    5.73
  -3  -1  -2  234.66    5.45
  -3  -1  -2  230.11    5.46
  -3  -1  -2  231.73    5.32
  -3  -1  -2  226.47    5.01
  -3  -1  -2  231.42    5.54
   3   1   2  233.88    5.19
   3   1   2  231.15    5.78
   3   1   2  229.53    6.05
   3   1   2  228.32    5.55
  -4  -1  -2   21.59    1.34
  -4  -1  -2   19.57    1.42
  -4  -1  -2   24.24    1.73
  -4  -1  -2   24.44    1.66
  -4  -1  -2   23.25    1.39
  -4  -1  -2   21.19    1.61
   4   1   2   21.93    1.94
   4   1   2   22.13    1.37
   4   1   2   21.90    1.81
   4   1   2   20.52    1.69
   4   1   2   21.57    1.73
  -5  -1  -2   61.44    2.28
  -5  -1  -2   60.97    2.30
  -5  -1  -2   58.98    2.66
  -5  -1  -2   57.25    2.60
  -5  -1  -2   57.31    2.47
  -5  -1  -2   59.24    2.76
  -5  -1  -2   61.79    2.64
   5   1   2   60.60    2.76
   5   1   2   63.60    2.86
   5   1   2   64.04    2.77
   5   1   2   56.27    2.25
   5   1   2   56.49    3.06
  -6  -1  -2    7.75    1.46
  -6  -1  -2    6.89    1.47
  -6  -1  -2    7.20    1.22
  -6  -1  -2    6.29    1.35
  -6  -1  -2    6.81    1.28
  -6  -1  -2    6.09    1.44
   6   1   2    4.29    1.37
   6   1   2    7.34    1.24
   6   1   2    6.70    1.47
   6   1   2    6.21    1.90
   6   1   2    7.07    1.61
  -7  -1  -2   -0.48    0.93
  -7  -1  -2    1.30    1.13
  -7  -1  -2    0.43    1.03
  -7  -1  -2   -1.51    1.05
  -7  -1  -2    0.01    1.36
  -7  -1  -2    1.20    1.32
   7   1   2    1.25    1.32
   7   1   2    0.59    1.67
   7   1   2   -0.82    0.87
   7   1   2   -0.05    1.40
   7   1   2    0.80    1.01
  -8  -1  -2    4.99    1.58
  -8  -1  -2    2.97    1.67
  -8  -1  -2    3.66    1.45
  -8  -1  -2    5.15    1.79
  -8  -1  -2    4.12    1.73
   8   1   2    5.92    1.47
   8   1   2    5.65    1.65
   8   1   2    4.24    1.73
   8   1   2    2.08    1.59
   8   1   2    4.42    2.00
  -9  -1  -2    3.21    1.79
  -9  -1  -2    2.61    1.68
  -9  -1  -2    4.47    1.96
  -9  -1  -2    4.92    1.78
   9   1   2    5.58    2.29
   9   1   2   -0.35    1.81
   9   1   2    0.89    1.67
   9   1   2    4.69    1.82
 -10  -1  -2   11.50    2.46
 -10  -1  -2    8.20    2.26
 -10  -1  -2   14.08    2.50
  10   1   2   12.44    2.41
  10   1   2   13.02    2.49
  10   1   2   11.03    2.25
 -11  -1  -2   -0.49    1.89
 -11  -1  -2   -1.37    2.24
 -11  -1  -2    1.13    1.80
  11   1   2    1.70    2.16
  11   1   2   -1.32    1.80
  11   1   2    0.60    1.79
  10  -2  -2   -1.03    1.88
  10  -2  -2    1.49    1.83
 -10   2   2    0.58    1.99
 -10   2   2   -0.39    1.93
 -10   2   2    1.87    2.09
   9  -2  -2    0.33    1.83
   9  -2  -2   -2.53    1.51
  -9   2   2   -0.82    1.25
  -9   2   2   -0.61    1.69
  -9   2   2    1.22    1.81
   8  -2  -2   -1.87    1.40
   8  -2  -2    0.89    1.52
   8  -2  -2    1.55    1.73
  -8   2   2   -0.30    1.46
  -8   2   2   -1.58    1.61
  -8   2   2   -0.52    1.63
  -8   2   2    1.60    1.84
   7  -2  -2    0.62    1.25
   7  -2  -2   -1.76    1.16
   7  -2  -2   -1.24    1.33
   7  -2  -2    0.56    1.33
  -7   2   2    0.58    1.32
  -7   2   2    0.53    1.56
  -7   2   2   -1.34    1.35
  -7   2   2    0.35    1.61
   6  -2  -2    8.71    1.73
   6  -2  -2   10.19    1.49
   6  -2  -2   13.19    1.31
   6  -2  -2    7.50    1.49
   6  -2  -2    8.14    1.29
   6  -2  -2    8.66    1.44
  -6   2   2    8.82    1.58
  -6   2   2    5.90    1.59
  -6   2   2    7.97    1.87
  -6   2   2    9.38    1.64
  -6   2   2    6.55    1.51
   5  -2  -2   73.33    2.48
   5  -2  -2   70.00    2.51
   5  -2  -2   71.30    2.58
   5  -2  -2   68.88    3.13
   5  -2  -2   74.13    2.92
  -5   2   2   73.55    3.11
  -5   2   2   68.59    3.04
  -5   2   2   70.80    2.53
  -5   2   2   74.76    2.83
  -5   2   2   73.10    3.26
  -5   2   2   70.43    2.85
   4  -2  -2   85.46    2.64
   4  -2  -2   86.05    2.58
   4  -2  -2   81.81    2.50
   4  -2  -2   85.70    3.10
   4  -2  -2   86.67    2.95
  -4   2   2   80.03    3.08
  -4   2   2   79.79    3.08
  -4   2   2   84.64    2.77
  -4   2   2   82.52    3.29
  -4   2   2   85.70    2.55
  -4   2   2   88.86    3.09
   3  -2  -2    4.41    1.16
   3  -2  -2    7.76    0.90
   3  -2  -2    7.57    1.04
   3  -2  -2    5.54    0.75
  -3   2   2    6.14    0.75
  -3   2   2    6.95    1.16
  -3   2   2    5.81    1.13
  -3   2   2    5.13    1.31
  -3   2   2    6.63    1.28
  -3   2   2    6.62    0.90
   2  -2  -2  123.61    3.50
   2  -2  -2  127.05    3.29
   2  -2  -2  124.70    2.89
   2  -2  -2  127.95    2.98
  -2   2   2  125.42    2.92
  -2   2   2  123.29    3.45
  -2   2   2  124.83    3.06
  -2   2   2  129.25    3.66
  -2   2   2  123.53    3.45
   1  -2  -2   54.12    1.75
   1  -2  -2   51.39    1.85
   1  -2  -2   49.97    1.36
   1  -2  -2   53.77    1.60
   1  -2  -2   50.41    1.71
  -1   2   2   51.90    1.95
  -1   2   2   51.86    1.62
  -1   2   2   52.32    1.85
  -1   2   2   53.56    1.82
  -1   2   2   51.17    1.42
  -1   2   2   53.47    1.75
   0  -2  -2    2.26    0.69
   0  -2  -2   -0.11    0.54
   0  -2  -2    0.69    0.61
   0  -2  -2    0.20    0.49
   0  -2  -2    1.72    0.72
   0   2   2    0.77    0.78
   0   2   2    2.00    0.93
   0   2   2    2.28    0.78
   0   2   2    2.41    0.99
   0   2   2    1.22    0.57
  -1  -2  -2   50.19    1.61
  -1  -2  -2   48.59    1.61
  -1  -2  -2   48.09    1.16
  -1  -2  -2   46.89    1.63
  -1  -2  -2   48.14    1.89
   1   2   2   46.79    1.49
   1   2   2   47.15    2.13
   1   2   2   45.51    1.15
   1   2   2   50.21    1.97
   1   2   2   49.34    1.71
  -2  -2  -2   13.90    1.20
  -2  -2  -2   14.41    0.90
  -2  -2  -2   13.32    1.10
  -2  -2  -2   14.18    1.64
  -2  -2  -2   13.93    1.00
  -2  -2  -2   13.09    0.66
   2   2   2   12.33    0.79
   2   2   2   14.44    1.78
   2   2   2   12.13    0.67
   2   2   2   13.97    1.44
   2   2   2   13.44    1.20
  -3  -2  -2  209.79    5.85
  -3  -2  -2  200.04    5.41
  -3  -2  -2  200.75    4.85
  -3  -2  -2  211.13    4.99
  -3  -2  -2  202.18    4.54
  -3  -2  -2  206.44    5.09
   3   2   2  208.71    5.46
   3   2   2  196.65    5.76
   3   2   2  209.68    4.57
   3   2   2  202.36    5.41
   3   2   2  203.76    4.94
  -4  -2  -2   16.99    1.23
  -4  -2  -2   18.03    2.06
  -4  -2  -2   11.40    1.53
  -4  -2  -2   17.61    1.49
  -4  -2  -2   18.00    1.43
  -4  -2  -2   19.62    1.21
  -4  -2  -2   18.58    1.63
   4   2   2   17.31    1.27
   4   2   2   17.11    1.77
   4   2   2   16.78    1.99
   4   2   2   17.79    1.51
   4   2   2   18.14    1.82
  -5  -2  -2   22.49    1.46
  -5  -2  -2   22.40    1.72
  -5  -2  -2   21.90    1.66
  -5  -2  -2   18.79    1.54
  -5  -2  -2   22.63    2.02
  -5  -2  -2   19.16    2.27
  -5  -2  -2   20.12    1.92
  -5  -2  -2   20.41    1.43
   5   2   2   19.24    1.53
   5   2   2   17.25    1.81
   5   2   2   18.78    2.20
   5   2   2   21.50    1.46
   5   2   2   21.37    1.84
   5   2   2   22.31    2.06
  -6  -2  -2    1.80    1.24
  -6  -2  -2    1.48    0.91
  -6  -2  -2    3.31    1.72
  -6  -2  -2    3.10    1.17
  -6  -2  -2    1.32    0.98
  -6  -2  -2   -0.43    0.92
  -6  -2  -2    2.00    1.11
   6   2   2    2.32    1.51
   6   2   2    1.02    1.20
   6   2   2    1.98    1.03
   6   2   2    2.52    1.28
   6   2   2    2.72    1.05
  -7  -2  -2   -0.51    1.06
  -7  -2  -2   -2.06    1.60
  -7  -2  -2   -2.72    1.34
  -7  -2  -2   -0.26    1.14
  -7  -2  -2   -1.06    1.16
  -7  -2  -2    0.01    1.17
  -7  -2  -2   -0.60    1.04
   7   2   2   -1.42    1.49
   7   2   2   -0.48    1.12
   7   2   2    1.13    1.17
   7   2   2   -1.62    1.22
   7   2   2   -1.32    1.34
  -8  -2  -2   17.02    2.09
  -8  -2  -2   22.08    2.40
  -8  -2  -2   12.93    2.05
  -8  -2  -2   18.48    2.31
  -8  -2  -2   18.12    2.23
  -8  -2  -2   18.12    2.37
   8   2   2   15.73    2.53
   8   2   2   13.63    2.22
   8   2   2   19.59    2.23
   8   2   2   15.31    2.10
   8   2   2   19.05    3.11
   8   2   2   19.47    2.16
  -9  -2  -2   19.05    2.51
  -9  -2  -2   21.03    2.45
  -9  -2  -2   13.74    2.42
  -9  -2  -2   17.09    2.45
  -9  -2  -2   19.61    2.50
   9   2   2   13.71    2.02
   9   2   2   16.70    2.99
   9   2   2   15.64    2.59
   9   2   2   17.08    2.52
   9   2   2   19.51    2.35
   9   2   2   17.40    2.39
 -10  -2  -2    1.02    1.78
 -10  -2  -2    2.25    1.89
 -10  -2  -2    0.56    1.63
  10   2   2   -2.87    1.62
  10   2   2    5.89    2.25
  10   2   2    0.64    1.68
  10   2   2   -1.08    1.80
 -11  -2  -2    1.65    1.98
 -11  -2  -2   -1.93    1.60
 -11  -2  -2   -2.98    1.80
  11   2   2    1.89    1.84
  11   2   2    1.49    1.80
  11   2   2    2.32    1.85
  10  -3  -2    3.81    2.12
  10  -3  -2    4.52    2.23
 -10   3   2    2.13    2.13
 -10   3   2   -0.86    2.04
 -10   3   2    4.26    2.34
   9  -3  -2    2.07    1.96
   9  -3  -2    2.16    1.91
  -9   3   2    3.32    2.00
  -9   3   2    5.21    2.21
  -9   3   2    4.11    2.02
   8  -3  -2    2.38    1.73
   8  -3  -2    2.92    1.93
  -8   3   2    0.76    1.47
  -8   3   2    5.63    2.06
  -8   3   2    1.92    1.88
   7  -3  -2   -0.48    1.56
   7  -3  -2   -1.29    1.46
   7  -3  -2   -3.66    1.34
  -7   3   2   -1.16    1.59
  -7   3   2    2.33    1.42
  -7   3   2   -0.13    1.60
  -7   3   2    3.36    1.75
   6  -3  -2   26.00    1.68
   6  -3  -2   23.83    2.53
   6  -3  -2   23.59    1.99
   6  -3  -2   23.41    2.27
  -6   3   2   26.33    2.25
  -6   3   2   25.44    2.53
  -6   3   2   23.83    2.11
  -6   3   2   26.58    2.50
   5  -3  -2   78.17    2.28
   5  -3  -2   76.98    3.47
   5  -3  -2   79.13    2.46
   5  -3  -2   77.58    2.30
   5  -3  -2   77.40    2.83
   5  -3  -2   75.88    3.05
  -5   3   2   79.74    3.06
  -5   3   2   83.61    3.47
  -5   3   2   76.45    3.53
  -5   3   2   79.06    3.54
   4  -3  -2   25.54    2.05
   4  -3  -2   27.91    1.09
   4  -3  -2   27.32    1.92
   4  -3  -2   26.96    1.60
   4  -3  -2   25.72    1.09
   4  -3  -2   30.11    1.17
  -4   3   2   27.18    2.08
  -4   3   2   25.49    2.09
  -4   3   2   25.06    1.97
  -4   3   2   25.44    1.17
  -4   3   2   27.58    1.86
   3  -3  -2   -1.49    0.93
   3  -3  -2   -0.18    0.33
   3  -3  -2    0.91    0.97
   3  -3  -2    0.68    0.43
   3  -3  -2   -0.19    0.51
   3  -3  -2    0.26    0.83
  -3   3   2    0.24    0.32
  -3   3   2    0.01    1.05
  -3   3   2   -0.23    0.87
  -3   3   2    0.34    0.40
  -3   3   2   -0.15    0.97
  -3   3   2    1.90    1.23
   2  -3  -2   26.24    0.93
   2  -3  -2   27.58    0.88
   2  -3  -2   27.40    1.34
   2  -3  -2   29.04    1.73
   2  -3  -2   26.08    1.61
  -2   3   2   28.42    1.72
  -2   3   2   26.15    0.92
  -2   3   2   25.90    0.85
  -2   3   2   25.82    1.80
  -2   3   2   23.87    1.75
   1  -3  -2   88.95    2.69
   1  -3  -2   86.27    2.30
   1  -3  -2   87.25    2.64
   1  -3  -2   89.81    2.25
   1  -3  -2   89.83    2.64
  -1   3   2   81.12    2.54
  -1   3   2   86.72    2.77
  -1   3   2   85.31    2.24
  -1   3   2   86.96    2.62
  -1   3   2   86.58    2.39
  -1   3   2   87.73    2.78
   0  -3  -2  139.90    3.49
   0  -3  -2  135.24    3.38
   0  -3  -2  133.60    3.26
   0  -3  -2  139.98    3.48
   0   3   2  134.20    3.64
   0   3   2  137.47    3.24
   0   3   2  136.34    3.62
   0   3   2  137.08    3.45
   0   3   2  130.42    3.58
  -1  -3  -2  124.05    3.05
  -1  -3  -2  123.10    3.44
  -1  -3  -2  115.79    3.15
  -1  -3  -2  117.58    2.57
  -1  -3  -2  122.41    3.69
  -1  -3  -2  119.92    3.15
   1   3   2  120.15    3.41
   1   3   2  117.51    2.57
   1   3   2  121.52    3.42
   1   3   2  114.49    3.35
   1   3   2  117.89    3.68
   1   3   2  117.89    3.13
  -2  -3  -2    0.49    0.80
  -2  -3  -2    0.20    1.15
  -2  -3  -2    1.33    0.76
  -2  -3  -2    0.91    0.98
  -2  -3  -2    0.62    0.65
   2   3   2    1.79    1.02
   2   3   2    0.60    1.26
   2   3   2    1.41    0.94
   2   3   2    1.21    1.05
   2   3   2    0.81    0.68
  -3  -3  -2   11.99    1.20
  -3  -3  -2   10.59    1.02
  -3  -3  -2    9.73    0.64
  -3  -3  -2   13.63    1.83
  -3  -3  -2    9.92    1.30
   3   3   2    9.25    0.62
   3   3   2   11.59    1.09
   3   3   2   11.97    1.48
   3   3   2   11.92    1.79
   3   3   2   10.55    1.39
  -4  -3  -2    4.85    0.99
  -4  -3  -2    5.37    0.76
  -4  -3  -2    3.34    1.02
  -4  -3  -2    5.83    1.75
  -4  -3  -2    4.80    1.21
  -4  -3  -2    3.78    1.29
   4   3   2    3.09    1.68
   4   3   2    4.75    1.46
   4   3   2    4.82    1.35
   4   3   2    4.70    1.35
   4   3   2    4.81    1.00
  -5  -3  -2   59.40    3.47
  -5  -3  -2   57.35    2.69
  -5  -3  -2   55.23    2.37
  -5  -3  -2   54.77    2.29
  -5  -3  -2   56.04    2.09
   5   3   2   56.68    3.11
   5   3   2   58.84    2.28
   5   3   2   57.99    3.41
   5   3   2   54.72    2.57
  -6  -3  -2   30.34    2.27
  -6  -3  -2   27.55    2.04
  -6  -3  -2   27.94    1.85
  -6  -3  -2   28.91    1.76
  -6  -3  -2   26.56    1.87
  -6  -3  -2   33.98    3.02
   6   3   2   27.97    2.02
   6   3   2   29.65    1.88
   6   3   2   27.42    2.72
   6   3   2   28.83    2.57
  -7  -3  -2   37.43    3.48
  -7  -3  -2   38.97    2.38
  -7  -3  -2   39.50    2.53
  -7  -3  -2   36.95    2.23
  -7  -3  -2   35.92    2.23
  -7  -3  -2   31.83    2.56
   7   3   2   37.89    2.30
   7   3   2   36.57    2.40
   7   3   2   37.14    3.29
   7   3   2   36.82    2.96
   7   3   2   34.72    2.57
  -8  -3  -2    2.20    1.67
  -8  -3  -2    2.89    1.43
  -8  -3  -2    0.82    1.17
  -8  -3  -2    1.58    1.34
  -8  -3  -2    0.39    2.16
  -8  -3  -2    3.17    1.53
   8   3   2    2.77    1.25
   8   3   2    1.97    1.94
   8   3   2    1.46    1.55
   8   3   2    2.00    1.67
   8   3   2    2.37    1.40
  -9  -3  -2    2.62    1.60
  -9  -3  -2    1.86    1.40
  -9  -3  -2    0.53    1.73
  -9  -3  -2    4.15    1.62
  -9  -3  -2    1.81    1.67
   9   3   2    2.14    1.33
   9   3   2    2.52    1.54
   9   3   2   -0.08    1.94
   9   3   2    4.30    2.57
   9   3   2    4.20    1.78
 -10  -3  -2    1.19    1.73
 -10  -3  -2    1.10    2.11
 -10  -3  -2    2.41    1.77
 -10  -3  -2    1.62    1.49
  10   3   2    3.92    2.03
  10   3   2    2.34    1.75
  10   3   2   -1.33    1.79
  10   3   2    6.95    2.71
  10   3   2   -0.05    1.52
 -11  -3  -2   -0.37    1.88
 -11  -3  -2   -0.78    2.06
 -11  -3  -2   -1.70    1.83
  11   3   2   12.10    2.59
  11   3   2    4.82    2.18
  11   3   2    2.93    1.95
  11   3   2    1.20    1.74
   9  -4  -2    1.12    1.88
   9  -4  -2    0.19    1.90
  -9   4   2    2.13    2.13
  -9   4   2   -2.67    1.88
  -9   4   2    3.18    2.22
   8  -4  -2    4.18    1.98
   8  -4  -2    2.29    1.83
  -8   4   2    3.15    2.04
  -8   4   2    1.20    1.95
  -8   4   2    0.40    1.83
   7  -4  -2   -2.51    1.43
   7  -4  -2   -0.07    1.26
   7  -4  -2    0.06    1.54
  -7   4   2    0.92    1.76
  -7   4   2   -0.61    1.32
  -7   4   2   -0.39    1.78
  -7   4   2    1.34    1.36
   6  -4  -2   -1.52    1.28
   6  -4  -2    0.91    1.52
   6  -4  -2    0.00    1.43
  -6   4   2   -0.44    1.52
  -6   4   2   -0.17    1.46
  -6   4   2    1.04    1.60
  -6   4   2    3.15    1.33
   5  -4  -2    1.51    1.20
   5  -4  -2    0.48    1.27
   5  -4  -2    0.61    1.33
  -5   4   2    1.33    1.16
  -5   4   2    2.11    1.35
  -5   4   2    3.42    1.67
  -5   4   2    0.94    1.10
   4  -4  -2   25.11    2.18
   4  -4  -2   25.89    1.76
   4  -4  -2   26.78    2.10
  -4   4   2   28.29    2.30
  -4   4   2   22.99    2.12
  -4   4   2   24.09    2.09
  -4   4   2   25.67    1.78
   3  -4  -2    5.60    1.06
   3  -4  -2    6.77    1.24
   3  -4  -2    7.03    1.23
  -3   4   2    4.57    1.33
  -3   4   2    4.85    1.49
  -3   4   2    4.90    1.31
  -3   4   2    6.25    1.16
   2  -4  -2    7.20    1.26
   2  -4  -2    7.09    1.25
   2  -4  -2    7.72    1.07
  -2   4   2    7.62    1.51
  -2   4   2    6.42    0.37
  -2   4   2    7.38    1.32
  -2   4   2    7.17    1.36
  -2   4   2    5.17    0.42
   1  -4  -2   32.44    1.54
   1  -4  -2   31.32    1.72
   1  -4  -2   32.55    1.79
   1  -4  -2   32.82    1.31
  -1   4   2   29.94    1.80
  -1   4   2   30.40    1.67
  -1   4   2   30.71    1.45
  -1   4   2   32.33    1.33
  -1   4   2   32.18    1.32
  -1   4   2   31.50    1.91
   0  -4  -2  198.05    4.71
   0  -4  -2  200.85    4.81
   0  -4  -2  196.47    4.88
   0  -4  -2  199.11    4.72
   0   4   2  200.75    5.07
   0   4   2  189.29    5.00
   0   4   2  191.54    4.74
   0   4   2  197.33    5.12
   0   4   2  192.28    4.60
   0   4   2  198.06    4.78
  -1  -4  -2   39.78    2.31
  -1  -4  -2   41.77    1.65
  -1  -4  -2   39.59    1.86
  -1  -4  -2   42.34    1.87
  -1  -4  -2   41.79    1.99
   1   4   2   42.62    2.18
   1   4   2   41.38    1.34
   1   4   2   42.82    1.99
   1   4   2   42.79    2.37
   1   4   2   43.17    2.19
   1   4   2   40.03    1.94
  -2  -4  -2   21.17    2.05
  -2  -4  -2   22.47    1.48
  -2  -4  -2   20.93    1.23
  -2  -4  -2   20.72    1.51
  -2  -4  -2   23.13    1.79
   2   4   2   25.35    1.85
   2   4   2   22.64    1.50
   2   4   2   17.40    1.96
   2   4   2   21.15    1.89
  -3  -4  -2    8.19    1.84
  -3  -4  -2    6.37    1.06
  -3  -4  -2    8.98    1.39
  -3  -4  -2    5.81    1.08
  -3  -4  -2    7.55    0.93
   3   4   2    8.98    1.56
   3   4   2    9.62    1.22
   3   4   2    7.04    1.53
   3   4   2    6.74    1.85
   3   4   2    8.66    1.31
  -4  -4  -2   65.58    2.56
  -4  -4  -2   64.00    3.55
  -4  -4  -2   64.32    2.75
  -4  -4  -2   67.06    2.28
   4   4   2   66.71    3.27
   4   4   2   61.20    3.54
   4   4   2   64.82    1.76
   4   4   2   65.48    2.49
   4   4   2   64.77    2.88
  -5  -4  -2    1.06    1.16
  -5  -4  -2    1.46    1.75
  -5  -4  -2    1.14    0.66
  -5  -4  -2    2.44    0.95
  -5  -4  -2    2.55    1.07
   5   4   2    2.28    0.69
   5   4   2    2.12    1.52
   5   4   2    2.03    1.07
   5   4   2    0.14    1.66
   5   4   2    1.33    1.25
  -6  -4  -2   43.11    3.53
  -6  -4  -2   40.68    2.17
  -6  -4  -2   40.69    1.85
  -6  -4  -2   42.38    2.45
  -6  -4  -2   40.94    2.59
   6   4   2   42.75    1.87
   6   4   2   45.02    3.14
   6   4   2   39.65    3.29
   6   4   2   45.31    2.66
   6   4   2   40.27    2.14
  -7  -4  -2    0.38    1.35
  -7  -4  -2    0.56    1.13
  -7  -4  -2   -0.15    2.00
  -7  -4  -2    0.99    1.26
  -7  -4  -2    0.75    0.94
   7   4   2    0.88    1.61
   7   4   2   -0.42    1.67
   7   4   2    1.74    0.95
   7   4   2    0.89    1.21
   7   4   2    2.18    1.43
  -8  -4  -2    5.18    2.72
  -8  -4  -2    8.16    1.49
  -8  -4  -2    5.45    1.68
  -8  -4  -2    3.59    1.53
  -8  -4  -2    4.19    1.81
   8   4   2    4.16    1.99
   8   4   2    6.83    1.31
   8   4   2    7.12    2.55
   8   4   2    5.80    1.80
   8   4   2    3.78    1.74
   8   4   2    5.91    1.56
  -9  -4  -2    9.06    1.98
  -9  -4  -2    6.00    2.05
  -9  -4  -2    5.30    1.73
  -9  -4  -2    8.24    1.73
  -9  -4  -2    8.42    3.16
   9   4   2   11.66    1.82
   9   4   2    9.17    2.79
   9   4   2    7.75    1.83
   9   4   2    6.26    2.18
   9   4   2    7.65    2.07
   9   4   2    5.54    2.24
 -10  -4  -2    3.06    3.09
 -10  -4  -2    2.43    1.76
 -10  -4  -2    2.51    2.16
 -10  -4  -2    1.69    1.73
  10   4   2    8.45    2.66
  10   4   2    1.45    2.10
  10   4   2    6.59    2.16
  10   4   2    2.02    1.75
 -11  -4  -2    0.23    1.58
 -11  -4  -2   -2.06    1.84
 -11  -4  -2    2.04    1.97
  11   4   2    2.31    1.81
  11   4   2    1.73    1.63
  11   4   2    7.34    2.46
  11   4   2    0.86    1.65
   9  -5  -2   -2.37    1.86
   9  -5  -2   -2.28    1.79
  -9   5   2    0.09    2.04
  -9   5   2    2.27    2.15
   8  -5  -2   -1.02    1.65
   8  -5  -2    0.13    1.75
  -8   5   2    0.36    1.90
  -8   5   2    4.32    2.16
  -8   5   2   -0.49    1.87
   7  -5  -2    3.61    1.78
   7  -5  -2    1.93    1.88
  -7   5   2    5.97    2.17
  -7   5   2    0.25    1.82
  -7   5   2    2.25    1.88
   6  -5  -2   14.60    2.22
   6  -5  -2   17.98    2.55
   6  -5  -2   13.81    2.02
  -6   5   2   13.55    2.32
  -6   5   2   15.91    2.03
  -6   5   2   14.39    2.65
  -6   5   2   15.62    2.49
   5  -5  -2   -0.45    1.27
   5  -5  -2    0.54    1.48
   5  -5  -2   -0.07    1.23
  -5   5   2   -0.74    1.37
  -5   5   2    0.00    1.57
  -5   5   2    2.76    1.32
  -5   5   2    0.97    1.53
   4  -5  -2   27.07    2.28
   4  -5  -2   26.08    1.94
   4  -5  -2   24.83    2.06
  -4   5   2   30.08    2.17
  -4   5   2   28.39    2.07
  -4   5   2   22.85    2.39
  -4   5   2   27.77    2.51
   3  -5  -2    3.59    1.00
   3  -5  -2    1.91    1.24
   3  -5  -2    1.96    1.18
  -3   5   2    1.00    1.26
  -3   5   2    2.57    1.21
  -3   5   2    2.31    1.21
   2  -5  -2    8.80    1.39
   2  -5  -2    7.86    1.38
   2  -5  -2    7.80    1.21
  -2   5   2    9.12    0.50
  -2   5   2    7.09    0.65
  -2   5   2    5.32    1.56
  -2   5   2    7.42    0.57
  -2   5   2    7.38    1.48
  -2   5   2    7.63    1.43
  -2   5   2    8.36    0.45
   1  -5  -2  212.21    5.32
   1  -5  -2  214.84    5.50
   1  -5  -2  222.79    5.66
  -1   5   2  212.54    5.19
  -1   5   2  224.65    6.09
  -1   5   2  208.67    5.74
  -1   5   2  212.44    4.95
  -1   5   2  218.38    5.52
  -1   5   2  216.37    5.00
   0  -5  -2   43.50    1.95
   0  -5  -2   40.93    2.10
   0  -5  -2   42.36    2.23
   0  -5  -2   39.61    1.99
   0   5   2   41.79    2.39
   0   5   2   39.85    1.83
   0   5   2   43.23    2.40
   0   5   2   41.35    2.02
   0   5   2   39.59    2.24
   0   5   2   41.75    1.96
  -1  -5  -2   17.12    1.94
  -1  -5  -2   15.95    1.28
  -1  -5  -2   16.31    1.47
  -1  -5  -2   15.71    1.31
  -1  -5  -2   19.83    1.71
   1   5   2   15.06    1.90
   1   5   2   19.11    1.88
   1   5   2   17.42    1.48
   1   5   2   16.48    1.07
   1   5   2   17.14    1.90
   1   5   2   17.52    1.65
  -2  -5  -2    0.35    0.99
  -2  -5  -2    1.07    0.96
  -2  -5  -2    1.08    1.03
  -2  -5  -2    0.62    1.37
  -2  -5  -2    1.90    0.76
   2   5   2   -0.42    1.38
   2   5   2    0.44    0.40
   2   5   2    1.97    1.08
   2   5   2    0.60    1.23
   2   5   2    1.67    1.22
   2   5   2    2.16    1.42
  -3  -5  -2    9.98    0.99
  -3  -5  -2    9.64    1.86
  -3  -5  -2    8.55    1.43
  -3  -5  -2   11.11    2.16
  -3  -5  -2    9.89    1.74
  -3  -5  -2    9.06    1.29
   3   5   2    8.88    1.78
   3   5   2    8.89    2.13
   3   5   2    9.78    1.94
   3   5   2    8.61    1.58
   3   5   2    8.96    1.77
  -4  -5  -2   15.07    2.48
  -4  -5  -2   13.86    1.48
  -4  -5  -2   14.80    2.05
  -4  -5  -2   12.61    1.14
  -4  -5  -2   13.58    1.66
   4   5   2   14.40    2.00
   4   5   2   15.00    1.64
   4   5   2   15.37    2.57
   4   5   2   12.76    0.63
   4   5   2   13.81    0.58
   4   5   2   14.11    2.10
  -5  -5  -2   54.97    3.68
  -5  -5  -2   52.36    2.51
  -5  -5  -2   49.19    2.69
  -5  -5  -2   53.73    2.12
   5   5   2   50.70    1.65
   5   5   2   52.99    3.62
   5   5   2   54.31    2.95
   5   5   2   60.15    2.56
   5   5   2   49.93    3.26
  -6  -5  -2    4.58    2.29
  -6  -5  -2    3.42    1.26
  -6  -5  -2    4.56    1.06
  -6  -5  -2    3.27    1.44
   6   5   2    3.96    0.85
   6   5   2    4.05    1.82
   6   5   2    3.49    1.43
   6   5   2    1.88    1.86
   6   5   2    3.82    1.36
  -7  -5  -2    6.82    1.59
  -7  -5  -2    7.92    1.18
  -7  -5  -2    6.15    1.75
  -7  -5  -2    6.89    1.33
  -7  -5  -2    8.03    2.72
   7   5   2    8.57    2.26
   7   5   2    7.95    1.18
   7   5   2    8.93    2.00
   7   5   2    9.42    1.77
   7   5   2   11.49    2.72
  -8  -5  -2    2.51    1.50
  -8  -5  -2    1.83    1.32
  -8  -5  -2   -0.52    2.47
  -8  -5  -2   -0.66    1.58
   8   5   2    5.36    2.09
   8   5   2    2.40    2.23
   8   5   2    0.12    1.67
   8   5   2    2.92    1.63
   8   5   2    2.04    2.03
  -9  -5  -2    5.94    1.78
  -9  -5  -2    4.15    2.00
  -9  -5  -2    1.33    2.85
  -9  -5  -2    6.40    1.57
   9   5   2    3.42    2.29
   9   5   2    3.63    2.01
   9   5   2    4.94    1.67
   9   5   2    4.85    2.68
 -10  -5  -2   -0.98    1.88
 -10  -5  -2   -1.43    2.85
 -10  -5  -2    0.20    1.38
 -10  -5  -2    1.53    1.94
  10   5   2    1.70    1.90
  10   5   2    1.62    1.68
  10   5   2    0.94    2.42
  10   5   2    6.45    2.76
 -11  -5  -2   -0.72    1.79
 -11  -5  -2    5.27    2.38
  11   5   2    3.70    2.79
  11   5   2    0.81    1.74
  11   5   2    5.71    2.44
   8  -6  -2   -0.66    1.82
   8  -6  -2   -1.12    1.81
  -8   6   2    1.51    2.03
  -8   6   2    4.63    2.25
   7  -6  -2    1.23    1.87
   7  -6  -2   -0.55    1.68
  -7   6   2    1.05    2.07
  -7   6   2    1.62    1.55
   6  -6  -2    0.59    1.67
   6  -6  -2   -0.04    1.73
   6  -6  -2   -0.54    1.49
  -6   6   2    0.78    2.01
  -6   6   2   -0.69    1.62
   5  -6  -2   19.71    2.52
   5  -6  -2   15.78    2.22
   5  -6  -2   16.16    2.02
  -5   6   2   13.95    2.39
  -5   6   2   14.00    2.43
  -5   6   2   16.55    2.10
   4  -6  -2   12.93    1.76
   4  -6  -2    7.22    1.82
   4  -6  -2    8.62    1.80
  -4   6   2   12.67    1.91
  -4   6   2   13.57    2.42
  -4   6   2   10.40    2.01
   3  -6  -2    5.17    1.46
   3  -6  -2    5.71    1.53
   3  -6  -2    5.89    1.28
  -3   6   2    5.80    1.71
  -3   6   2    6.84    1.64
  -3   6   2    6.61    1.93
   2  -6  -2    7.96    1.45
   2  -6  -2   10.82    1.48
   2  -6  -2    8.99    1.42
  -2   6   2   10.26    1.64
  -2   6   2   10.09    0.81
  -2   6   2    8.39    1.65
  -2   6   2    9.81    1.77
  -2   6   2    9.95    0.61
  -2   6   2    8.20    0.89
  -2   6   2    7.21    0.72
   1  -6  -2   49.49    2.39
   1  -6  -2   54.30    2.66
   1  -6  -2   56.19    2.47
  -1   6   2   55.76    2.47
  -1   6   2   55.85    2.84
  -1   6   2   52.41    1.95
  -1   6   2   53.38    2.25
  -1   6   2   56.12    3.00
  -1   6   2   53.53    2.05
   0  -6  -2  130.77    3.84
   0  -6  -2  128.22    4.10
   0  -6  -2  132.45    4.28
   0  -6  -2  125.16    3.90
   0   6   2  130.66    4.48
   0   6   2  132.18    3.80
   0   6   2  129.09    3.84
   0   6   2  128.72    4.26
   0   6   2  130.54    4.38
   0   6   2  137.74    4.00
  -1  -6  -2    4.07    1.19
  -1  -6  -2    4.31    0.97
  -1  -6  -2    4.09    1.51
  -1  -6  -2    3.96    1.00
   1   6   2    4.45    1.55
   1   6   2    5.21    0.87
   1   6   2    4.99    1.34
   1   6   2    4.64    1.56
   1   6   2    4.86    1.58
  -2  -6  -2    6.47    1.41
  -2  -6  -2    5.15    0.93
  -2  -6  -2    5.84    1.31
  -2  -6  -2    6.26    1.73
  -2  -6  -2    4.70    1.19
   2   6   2    4.62    1.47
   2   6   2    5.17    1.32
   2   6   2    6.05    1.89
   2   6   2    6.92    1.46
   2   6   2    5.86    0.72
   2   6   2    5.17    1.56
  -3  -6  -2   33.53    2.03
  -3  -6  -2   30.53    2.72
  -3  -6  -2   31.50    1.51
  -3  -6  -2   32.09    2.11
  -3  -6  -2   30.08    0.96
  -3  -6  -2   32.30    2.44
   3   6   2   29.93    2.77
   3   6   2   33.14    2.19
   3   6   2   30.33    2.42
   3   6   2   29.82    0.95
   3   6   2   30.72    2.50
  -4  -6  -2   36.99    2.16
  -4  -6  -2   33.16    3.02
  -4  -6  -2   36.05    1.59
  -4  -6  -2   31.70    2.63
  -4  -6  -2   33.12    2.24
   4   6   2   31.95    2.21
   4   6   2   31.53    2.56
   4   6   2   31.93    3.03
   4   6   2   34.97    2.82
  -5  -6  -2    6.21    0.97
  -5  -6  -2    7.74    2.33
  -5  -6  -2    7.67    1.43
  -5  -6  -2    6.60    1.90
  -5  -6  -2    5.75    1.54
   5   6   2    5.99    0.62
   5   6   2    6.49    1.62
   5   6   2    6.29    1.93
   5   6   2    8.14    1.65
   5   6   2    7.34    2.38
  -6  -6  -2    5.05    2.36
  -6  -6  -2    4.82    1.02
  -6  -6  -2    4.84    1.64
  -6  -6  -2    4.56    1.38
   6   6   2    3.20    1.68
   6   6   2    2.13    1.85
   6   6   2    3.23    2.13
   6   6   2    4.52    1.82
  -7  -6  -2    8.85    2.89
  -7  -6  -2    6.93    1.25
  -7  -6  -2    7.24    1.94
  -7  -6  -2    6.87    1.62
   7   6   2    7.78    1.96
   7   6   2    6.00    2.19
   7   6   2    9.05    2.14
   7   6   2    8.13    2.71
  -8  -6  -2    5.11    1.72
  -8  -6  -2    2.48    1.23
  -8  -6  -2    4.45    2.90
  -8  -6  -2    3.62    1.85
   8   6   2    5.44    2.50
   8   6   2    4.76    2.26
   8   6   2    2.58    1.61
   8   6   2    1.30    1.95
  -9  -6  -2    8.80    2.27
  -9  -6  -2    3.67    3.20
  -9  -6  -2    7.52    1.94
   9   6   2    7.92    2.90
   9   6   2    5.16    2.59
   9   6   2    4.22    1.98
   9   6   2    4.17    2.18
 -10  -6  -2    0.51    2.08
 -10  -6  -2    0.26    1.64
 -10  -6  -2   -1.43    3.60
  10   6   2    5.07    2.84
  10   6   2   -1.14    1.91
 -11  -6  -2   -0.93    3.47
 -11  -6  -2    2.16    1.94
 -11  -6  -2   -0.34    2.11
  11   6   2    4.74    2.73
  11   6   2    2.89    1.91
  11   6   2    3.35    2.21
   7  -7  -2    1.19    1.93
   7  -7  -2   -1.51    1.79
  -7   7   2    3.76    2.33
  -7   7   2    0.64    1.87
   6  -7  -2    8.39    2.29
   6  -7  -2   11.65    2.32
  -6   7   2   12.74    2.77
  -6   7   2   13.04    2.57
   5  -7  -2    3.60    1.40
   5  -7  -2    3.81    1.85
   5  -7  -2    3.82    1.86
  -5   7   2    2.98    1.87
  -5   7   2    1.27    2.04
   4  -7  -2    2.76    1.44
   4  -7  -2    0.54    1.22
   4  -7  -2    0.08    1.49
  -4   7   2    0.28    1.78
  -4   7   2   -0.87    1.51
  -4   7   2    1.93    1.51
   3  -7  -2    0.06    1.31
   3  -7  -2    1.82    1.31
   3  -7  -2    2.58    1.46
  -3   7   2    0.73    1.35
  -3   7   2    2.05    1.57
  -3   7   2    3.72    1.87
   2  -7  -2    2.12    1.11
   2  -7  -2    3.83    1.26
   2  -7  -2    5.44    1.55
  -2   7   2    2.07    1.74
  -2   7   2    2.78    1.66
  -2   7   2    3.34    1.42
   1  -7  -2   32.29    2.09
   1  -7  -2   35.49    2.44
   1  -7  -2   33.43    2.12
  -1   7   2   30.78    2.86
  -1   7   2   30.90    1.93
  -1   7   2   31.02    2.37
  -1   7   2   32.22    2.11
  -1   7   2   29.56    1.76
  -1   7   2   34.17    1.64
   0  -7  -2    2.98    1.26
   0  -7  -2    2.11    1.00
   0  -7  -2    4.07    1.44
   0  -7  -2    2.73    1.17
   0   7   2    4.22    1.17
   0   7   2    2.76    1.14
   0   7   2    2.41    1.59
   0   7   2    4.28    1.35
   0   7   2    3.59    1.71
  -1  -7  -2    0.73    1.12
  -1  -7  -2    1.96    0.93
  -1  -7  -2    2.20    1.50
  -1  -7  -2    1.96    1.29
   1   7   2    0.65    1.49
   1   7   2    2.59    1.04
   1   7   2    3.33    1.49
   1   7   2    1.19    0.80
   1   7   2    1.33    1.25
   1   7   2    1.58    1.59
  -2  -7  -2   23.67    2.03
  -2  -7  -2   27.75    2.73
  -2  -7  -2   27.10    2.08
  -2  -7  -2   25.10    1.56
   2   7   2   26.02    2.66
   2   7   2   27.31    2.30
   2   7   2   25.32    1.30
   2   7   2   27.82    2.59
   2   7   2   26.83    2.49
  -3  -7  -2   16.33    1.29
  -3  -7  -2   18.03    2.26
  -3  -7  -2   15.68    1.78
  -3  -7  -2   17.46    2.01
  -3  -7  -2   19.94    2.79
   3   7   2   21.45    2.54
   3   7   2   16.12    2.21
   3   7   2   16.56    0.90
   3   7   2   21.31    2.33
   3   7   2   14.35    2.53
  -4  -7  -2   10.46    1.77
  -4  -7  -2    8.67    1.90
  -4  -7  -2    9.88    1.06
  -4  -7  -2   10.47    1.60
  -4  -7  -2   13.05    2.67
   4   7   2   10.18    0.68
   4   7   2   10.51    2.12
   4   7   2   11.07    1.98
   4   7   2   10.37    2.55
   4   7   2    9.60    2.08
  -5  -7  -2    1.24    1.65
  -5  -7  -2   -0.68    1.13
  -5  -7  -2   -0.24    0.97
  -5  -7  -2   -0.05    1.94
  -5  -7  -2    1.31    0.70
   5   7   2   -0.11    1.74
   5   7   2    1.37    2.05
   5   7   2   -0.59    1.62
   5   7   2   -0.72    1.43
  -6  -7  -2    2.27    1.49
  -6  -7  -2    0.28    2.14
  -6  -7  -2    0.20    0.82
  -6  -7  -2   -0.45    1.28
   6   7   2   -0.70    2.02
   6   7   2   -0.84    1.81
   6   7   2   -0.07    1.73
   6   7   2    0.45    1.81
  -7  -7  -2    0.05    1.55
  -7  -7  -2   -0.80    2.38
  -7  -7  -2   -3.31    1.38
   7   7   2   -0.44    1.86
   7   7   2    0.34    1.80
   7   7   2   -0.70    2.10
   7   7   2    1.42    1.97
  -8  -7  -2   -1.23    2.65
  -8  -7  -2    4.24    1.90
  -8  -7  -2    2.59    1.84
   8   7   2    5.64    2.35
   8   7   2    0.78    2.45
   8   7   2    1.34    1.71
   8   7   2    4.73    2.43
  -9  -7  -2   -0.78    1.78
  -9  -7  -2    2.44    3.05
  -9  -7  -2    3.51    1.79
   9   7   2   -0.16    2.12
   9   7   2    1.01    2.02
   9   7   2    2.68    2.52
 -10  -7  -2   -1.84    3.32
 -10  -7  -2   -1.22    1.93
 -10  -7  -2    2.17    1.80
  10   7   2    1.39    2.19
  10   7   2    6.31    2.83
   6  -8  -2    4.85    2.06
   6  -8  -2    1.36    1.99
  -6   8   2    0.58    1.93
  -6   8   2    0.96    2.07
   5  -8  -2    2.60    1.93
   5  -8  -2    2.04    1.86
  -5   8   2    6.14    2.16
  -5   8   2    2.38    1.81
   4  -8  -2    3.59    1.58
   4  -8  -2    1.91    1.75
   4  -8  -2    1.04    1.63
  -4   8   2    1.34    1.64
  -4   8   2    2.83    1.83
  -4   8   2    0.19    1.95
   3  -8  -2    1.72    1.52
   3  -8  -2    3.07    1.71
   3  -8  -2    3.71    1.51
  -3   8   2    2.44    2.00
  -3   8   2    0.08    1.44
  -3   8   2    1.39    1.56
   2  -8  -2   24.48    2.39
   2  -8  -2   24.95    2.43
   2  -8  -2   28.01    2.37
  -2   8   2   28.59    3.25
  -2   8   2   24.30    2.51
  -2   8   2   26.32    2.96
   1  -8  -2   15.11    1.91
   1  -8  -2   15.71    2.10
   1  -8  -2   18.50    2.03
  -1   8   2   17.55    2.62
  -1   8   2   16.64    2.63
  -1   8   2   18.87    2.15
   0  -8  -2    8.35    1.72
   0  -8  -2    8.56    1.46
   0  -8  -2    9.38    1.92
   0  -8  -2   11.48    1.85
   0   8   2    5.80    2.07
   0   8   2    7.96    1.40
   0   8   2   10.77    1.37
   0   8   2    9.54    1.79
   0   8   2    6.56    2.01
   0   8   2   11.87    1.65
  -1  -8  -2   -0.65    1.28
  -1  -8  -2   -0.96    0.90
  -1  -8  -2   -0.97    1.44
  -1  -8  -2   -1.49    1.15
   1   8   2    0.42    1.28
   1   8   2    1.38    1.32
   1   8   2    0.99    1.82
   1   8   2    1.42    1.48
   1   8   2    1.02    0.93
  -2  -8  -2    8.07    1.72
  -2  -8  -2   10.52    1.75
  -2  -8  -2    9.67    1.35
  -2  -8  -2   10.84    2.40
   2   8   2   12.03    2.29
   2   8   2   11.22    1.21
   2   8   2   11.36    2.38
   2   8   2   13.23    2.18
   2   8   2    9.44    2.24
  -3  -8  -2    5.77    2.14
  -3  -8  -2    3.35    1.59
  -3  -8  -2    5.45    1.54
  -3  -8  -2    3.67    0.97
  -3  -8  -2    4.18    1.48
   3   8   2    4.83    2.01
   3   8   2    8.74    2.11
   3   8   2    4.17    1.87
   3   8   2    6.27    2.18
   3   8   2    5.88    0.84
  -4  -8  -2    7.13    1.78
  -4  -8  -2    7.80    1.71
  -4  -8  -2    8.93    2.12
  -4  -8  -2    9.27    2.62
   4   8   2    8.15    2.16
   4   8   2   10.56    2.36
   4   8   2   12.14    2.86
   4   8   2    7.74    2.11
  -5  -8  -2   -0.98    1.30
  -5  -8  -2   -3.58    1.72
  -5  -8  -2    0.75    1.37
  -5  -8  -2    0.12    1.67
   5   8   2    0.94    1.94
   5   8   2    0.19    2.34
   5   8   2   -1.81    1.75
   5   8   2   -0.11    1.70
  -6  -8  -2    1.61    1.46
  -6  -8  -2    5.47    1.81
  -6  -8  -2   -1.29    2.25
   6   8   2    2.95    2.21
   6   8   2   -0.18    2.06
   6   8   2    2.43    1.89
   6   8   2    1.34    2.40
  -7  -8  -2    3.40    1.85
  -7  -8  -2    3.88    2.81
  -7  -8  -2    6.00    1.90
   7   8   2    9.47    3.26
   7   8   2    4.05    2.33
   7   8   2    6.01    2.22
   7   8   2    3.63    2.29
  -8  -8  -2    1.19    2.88
  -8  -8  -2    4.48    2.02
  -8  -8  -2   -1.63    1.59
   8   8   2    0.64    2.21
   8   8   2    1.30    2.22
   8   8   2    4.42    2.80
   8   8   2    5.25    2.43
  -9  -8  -2   10.01    3.95
  -9  -8  -2    8.06    2.10
  -9  -8  -2    6.56    2.31
   9   8   2   11.93    3.44
   9   8   2    3.49    2.05
   9   8   2    3.24    2.72
 -10  -8  -2    0.81    2.16
 -10  -8  -2   -0.79    3.56
 -10  -8  -2    1.28    2.02
  10   8   2    8.85    3.12
  10   8   2   -1.30    2.20
   5  -9  -2   -0.59    1.74
   5  -9  -2   -0.70    1.78
  -5   9   2    1.84    1.94
  -5   9   2    1.39    2.36
   4  -9  -2    1.64    1.47
   4  -9  -2   -0.96    1.76
   4  -9  -2    1.97    1.71
  -4   9   2    1.92    1.91
  -4   9   2    3.01    2.25
   3  -9  -2    1.90    1.54
   3  -9  -2   -1.19    1.65
   3  -9  -2   -0.32    1.45
  -3   9   2    0.04    1.59
  -3   9   2   -2.73    1.96
  -3   9   2    0.61    2.01
   2  -9  -2    3.86    1.62
   2  -9  -2    1.65    1.69
   2  -9  -2    2.00    1.49
  -2   9   2    2.72    2.15
  -2   9   2    1.94    2.12
  -2   9   2    3.14    1.68
   1  -9  -2    0.31    1.38
   1  -9  -2   -0.76    1.30
   1  -9  -2    2.01    1.64
  -1   9   2    1.33    2.03
  -1   9   2    1.66    1.38
  -1   9   2   -4.02    2.22
   0  -9  -2    7.03    2.27
   0  -9  -2    6.89    1.87
   0  -9  -2    8.80    1.96
   0  -9  -2    6.07    1.50
   0   9   2    6.98    1.96
   0   9   2    8.29    1.62
   0   9   2    6.86    2.39
  -1  -9  -2    1.16    1.82
  -1  -9  -2    2.83    1.55
  -1  -9  -2    1.58    1.55
  -1  -9  -2   -0.20    1.11
   1   9   2   -0.84    1.99
   1   9   2    4.63    1.80
   1   9   2    0.71    1.09
   1   9   2   -0.08    1.90
   1   9   2    2.05    1.59
  -2  -9  -2    2.42    1.30
  -2  -9  -2    2.90    1.39
  -2  -9  -2    2.59    2.08
  -2  -9  -2    1.29    1.49
   2   9   2    1.34    1.74
   2   9   2    4.09    1.87
   2   9   2    3.23    1.06
   2   9   2    6.24    2.23
   2   9   2    2.12    1.99
  -3  -9  -2   21.09    3.33
  -3  -9  -2   22.95    2.45
  -3  -9  -2   15.96    2.28
   3   9   2   20.93    3.08
   3   9   2   16.74    2.71
   3   9   2   19.43    3.19
   3   9   2   20.08    2.72
  -4  -9  -2   25.66    2.62
  -4  -9  -2   22.28    2.62
  -4  -9  -2   19.90    3.47
   4   9   2   22.78    3.04
   4   9   2   28.91    3.88
   4   9   2   26.98    3.34
   4   9   2   22.34    2.96
  -5  -9  -2   12.72    3.30
  -5  -9  -2   11.68    2.24
  -5  -9  -2   15.54    2.24
   5   9   2   14.07    2.90
   5   9   2   16.04    3.42
   5   9   2   12.95    2.56
   5   9   2   14.77    2.83
  -6  -9  -2    7.27    1.92
  -6  -9  -2    2.34    1.72
  -6  -9  -2    5.07    2.89
   6   9   2    5.91    3.02
   6   9   2    0.56    2.03
   6   9   2    3.36    2.25
   6   9   2    4.84    2.49
  -7  -9  -2    3.77    2.97
  -7  -9  -2    3.39    2.00
  -7  -9  -2    3.80    1.79
   7   9   2    3.82    2.47
   7   9   2    1.95    2.11
   7   9   2    7.43    3.21
   7   9   2   -2.27    2.04
  -8  -9  -2   18.45    2.56
  -8  -9  -2   13.40    2.66
  -8  -9  -2   13.14    3.80
   8   9   2   12.07    3.04
   8   9   2   16.49    3.14
   8   9   2   22.42    4.28
  -9  -9  -2    0.46    3.31
  -9  -9  -2    2.49    2.11
  -9  -9  -2    2.64    1.94
   9   9   2    2.52    2.52
   9   9   2   10.75    3.51
 -10  -9  -2   -1.12    3.67
  10   9   2    3.89    2.92
  10   9   2    1.60    2.68
   4 -10  -2   -0.53    1.96
   4 -10  -2    0.98    1.74
  -4  10   2   -1.26    1.67
  -4  10   2    3.53    2.35
   3 -10  -2    1.11    1.98
   3 -10  -2    0.55    1.61
   3 -10  -2    1.97    1.58
  -3  10   2    3.41    1.95
  -3  10   2    1.26    1.77
   2 -10  -2    7.42    1.91
   2 -10  -2    5.61    1.85
   2 -10  -2    3.81    2.02
  -2  10   2    5.16    2.75
  -2  10   2    5.09    2.49
  -2  10   2    2.61    1.93
   1 -10  -2   -1.06    1.30
   1 -10  -2    1.46    1.85
   1 -10  -2    1.00    1.44
  -1  10   2   -3.18    2.44
  -1  10   2    2.08    2.14
  -1  10   2    0.33    1.53
   0 -10  -2   15.79    2.44
   0 -10  -2   18.10    2.59
   0 -10  -2   16.72    2.16
   0  10   2   13.80    1.94
   0  10   2   16.38    3.42
   0  10   2   15.18    2.59
  -1 -10  -2   -0.75    2.00
  -1 -10  -2   -1.50    1.52
  -1 -10  -2    2.33    1.79
   1  10   2    2.54    2.82
   1  10   2   -1.84    2.28
   1  10   2    0.90    2.17
  -2 -10  -2    2.61    2.33
  -2 -10  -2    1.28    1.63
  -2 -10  -2    2.32    1.82
   2  10   2    0.57    2.03
   2  10   2    0.53    2.40
   2  10   2    5.71    2.33
   2  10   2   -0.72    1.71
  -3 -10  -2   20.42    2.58
  -3 -10  -2   18.66    2.61
  -3 -10  -2   21.14    3.62
   3  10   2   21.26    3.46
   3  10   2   22.70    3.24
   3  10   2   21.52    3.14
   3  10   2   20.28    3.61
  -4 -10  -2   55.10    3.55
  -4 -10  -2   42.89    3.29
  -4 -10  -2   45.42    4.34
   4  10   2   46.91    3.87
   4  10   2   46.94    3.72
   4  10   2   52.18    4.46
   4  10   2   48.67    4.10
  -5 -10  -2    1.20    1.67
  -5 -10  -2   -1.83    1.64
  -5 -10  -2   -1.20    2.37
   5  10   2   -1.69    2.14
   5  10   2    2.92    2.59
   5  10   2    2.12    2.53
   5  10   2    1.12    2.05
  -6 -10  -2   -2.60    2.48
  -6 -10  -2    1.26    1.77
  -6 -10  -2    1.54    1.79
   6  10   2    6.14    3.02
   6  10   2   -0.38    2.44
   6  10   2    0.99    2.28
   6  10   2   -0.65    2.41
  -7 -10  -2    3.80    2.05
  -7 -10  -2    2.10    1.81
  -7 -10  -2    6.73    3.30
   7  10   2    9.13    3.50
   7  10   2    1.45    2.51
   7  10   2    1.08    2.26
  -8 -10  -2   -0.51    1.91
  -8 -10  -2   -0.09    3.07
  -8 -10  -2   -0.92    1.68
   8  10   2    0.34    2.33
   8  10   2    4.93    3.10
   8  10   2   -3.61    2.24
  -9 -10  -2   -0.86    3.25
  -9 -10  -2    1.61    2.17
  -9 -10  -2    3.80    2.39
   9  10   2   -1.02    2.62
   9  10   2    9.07    3.75
   3 -11  -2    0.00    2.11
   3 -11  -2   -1.38    1.63
  -3  11   2   -1.67    2.09
  -3  11   2   -1.39    1.65
   2 -11  -2    3.72    1.86
   2 -11  -2   -1.66    1.96
  -2  11   2    1.92    1.67
  -2  11   2    2.70    2.26
   1 -11  -2   11.79    2.48
   1 -11  -2    8.12    2.28
  -1  11   2    0.97    3.00
  -1  11   2    6.38    1.97
  -1  11   2    7.11    2.59
   0 -11  -2    9.79    2.42
   0 -11  -2    9.54    2.17
   0  11   2   10.88    2.43
   0  11   2    9.43    3.06
  -1 -11  -2    1.63    1.68
  -1 -11  -2   -0.96    1.71
   1  11   2   -2.68    2.51
   1  11   2    0.97    2.23
  -2 -11  -2    2.09    2.05
  -2 -11  -2    5.78    2.04
  -2 -11  -2    1.98    2.49
   2  11   2    4.56    2.48
   2  11   2    2.14    2.83
  -3 -11  -2   14.68    3.29
  -3 -11  -2   11.31    2.41
  -3 -11  -2   10.68    2.36
   3  11   2   15.69    3.02
   3  11   2    8.13    2.37
   3  11   2   13.48    3.32
   3  11   2   10.94    2.84
  -4 -11  -2    0.50    1.71
  -4 -11  -2    3.33    1.94
  -4 -11  -2    2.11    2.62
   4  11   2    6.03    3.04
   4  11   2    5.36    2.35
   4  11   2   11.53    3.04
   4  11   2    2.88    2.48
  -5 -11  -2   -0.45    2.55
  -5 -11  -2   -0.61    1.82
  -5 -11  -2   -0.25    1.74
   5  11   2    1.26    2.18
   5  11   2   -0.26    2.17
   5  11   2   -0.42    2.77
   5  11   2    6.25    2.79
  -6 -11  -2    2.83    2.04
  -6 -11  -2    1.72    1.94
  -6 -11  -2   -0.91    2.77
   6  11   2    4.89    2.85
   6  11   2   -1.84    2.34
   6  11   2    2.29    2.82
  -7 -11  -2   -2.04    2.85
  -7 -11  -2    2.76    2.07
  -7 -11  -2    0.06    1.73
   7  11   2    7.47    3.45
   7  11   2    4.79    2.92
   7  11   2   -1.50    2.35
  -8 -11  -2    1.24    1.90
  -8 -11  -2    4.86    2.29
  -8 -11  -2   -0.43    3.31
   8  11   2    4.44    2.98
   8  11   2    0.08    2.59
   8  11   2   14.33    4.09
   1 -12  -2    5.62    2.05
   1 -12  -2   -1.47    2.07
  -1  12   2   -2.21    2.19
   0 -12  -2    4.01    2.19
   0 -12  -2    4.20    1.91
   0  12   2    1.02    2.24
   0  12   2   -4.99    2.67
  -1 -12  -2    3.16    2.17
  -1 -12  -2    8.82    2.42
   1  12   2    2.69    3.04
   1  12   2    2.72    2.41
  -2 -12  -2   -0.72    1.80
  -2 -12  -2   -1.03    1.65
   2  12   2   -4.87    2.85
   2  12   2    1.33    2.35
  -3 -12  -2    1.69    3.33
  -3 -12  -2   -1.02    2.18
  -3 -12  -2    3.05    1.92
   3  12   2    1.90    2.44
   3  12   2   -1.48    2.92
  -4 -12  -2    4.15    2.07
  -4 -12  -2   -3.72    2.61
  -4 -12  -2   -1.50    2.03
   4  12   2   -1.96    2.18
   4  12   2   -1.80    2.91
   4  12   2    9.31    2.97
   4  12   2   -0.81    2.28
  -5 -12  -2    2.29    2.06
  -5 -12  -2    2.06    2.00
  -5 -12  -2    3.53    3.05
   5  12   2   11.74    3.36
   5  12   2   -0.04    3.14
   5  12   2   -0.17    2.60
  -6 -12  -2   -0.67    1.93
  -6 -12  -2   -3.10    2.76
  -6 -12  -2    1.10    1.91
   6  12   2   -4.43    2.95
   6  12   2    9.48    3.41
   6  12   2    0.62    2.55
   5  11  -3    2.35    3.12
   5  11  -3   -3.56    2.52
  -5 -11   3    3.26    2.27
  -5 -11   3    2.79    2.91
   4  11  -3   -1.55    2.72
   4  11  -3   -1.32    2.60
  -4 -11   3    4.19    2.19
  -4 -11   3    2.93    2.79
   3  11  -3    0.28    2.67
   3  11  -3    0.67    1.97
  -3 -11   3    2.90    1.97
  -3 -11   3    0.34    2.73
  -3 -11   3    1.73    2.04
   2  11  -3    1.95    2.76
   2  11  -3    1.06    2.49
  -2 -11   3    2.61    2.08
  -2 -11   3    5.95    2.13
   1  11  -3    2.69    2.75
  -1 -11   3    2.29    2.07
  -1 -11   3    3.93    2.11
   0  11  -3   -1.24    1.76
   0  11  -3    4.24    2.10
   0 -11   3    1.68    1.95
   0 -11   3   -1.22    2.04
   7  10  -3    0.26    2.92
   7  10  -3    7.48    3.09
  -7 -10   3    8.40    3.75
  -7 -10   3    3.80    2.29
   6  10  -3   -3.08    2.52
   6  10  -3    3.66    2.96
  -6 -10   3    3.22    2.21
  -6 -10   3    0.69    2.71
   5  10  -3    5.62    2.90
   5  10  -3   11.81    3.32
  -5 -10   3    9.67    3.38
  -5 -10   3    9.55    2.59
   4  10  -3    1.33    2.53
   4  10  -3    5.47    2.90
   4  10  -3    6.21    2.41
  -4 -10   3    3.53    3.04
  -4 -10   3    2.93    1.66
  -4 -10   3    4.05    2.16
  -4 -10   3    5.26    2.40
   3  10  -3    8.76    2.92
   3  10  -3   14.34    3.30
   3  10  -3   17.63    2.92
  -3 -10   3    9.58    2.45
  -3 -10   3   10.81    2.48
  -3 -10   3   11.19    3.23
  -3 -10   3   11.19    2.36
   2  10  -3    3.54    2.33
   2  10  -3    3.81    2.59
   2  10  -3    2.09    2.35
   2  10  -3    1.24    1.92
  -2 -10   3    3.79    1.97
  -2 -10   3    2.53    1.97
  -2 -10   3    1.62    2.44
  -2 -10   3    1.25    1.86
   1  10  -3    3.22    2.81
   1  10  -3    1.51    2.23
   1  10  -3    3.92    1.86
  -1 -10   3   -1.36    1.56
  -1 -10   3   -0.67    1.72
   0  10  -3    4.66    1.91
   0  10  -3    4.89    2.57
   0 -10   3    4.37    1.89
   0 -10   3    6.41    2.24
  -1  10  -3    4.51    1.96
  -1  10  -3   -0.88    2.34
   1 -10   3    2.58    1.89
   1 -10   3    0.63    1.84
  -2  10  -3    2.42    2.49
  -2  10  -3    3.41    2.03
   2 -10   3    2.13    1.99
   2 -10   3    0.27    2.06
   8   9  -3    0.23    2.72
   8   9  -3   10.26    3.16
  -8  -9   3   -0.06    3.10
  -8  -9   3    6.87    2.55
   7   9  -3    6.15    2.86
   7   9  -3    1.05    2.62
  -7  -9   3    5.10    2.26
  -7  -9   3    9.86    3.55
   6   9  -3   -2.07    2.40
   6   9  -3    2.96    2.59
  -6  -9   3    1.08    1.97
  -6  -9   3    3.52    2.91
   5   9  -3    0.70    2.07
   5   9  -3   -2.11    2.33
   5   9  -3   -2.10    2.28
  -5  -9   3    3.51    2.74
  -5  -9   3    1.51    1.99
  -5  -9   3   -0.76    1.81
   4   9  -3    7.72    2.47
   4   9  -3    4.98    2.58
   4   9  -3    5.76    2.70
  -4  -9   3    7.22    2.52
  -4  -9   3    4.52    1.71
  -4  -9   3    5.89    3.15
  -4  -9   3    6.27    2.12
   3   9  -3   -0.64    1.24
   3   9  -3    3.10    1.97
   3   9  -3   -2.11    2.01
   3   9  -3   -3.06    2.24
  -3  -9   3    1.46    1.90
  -3  -9   3   -0.04    1.34
  -3  -9   3    1.98    2.05
  -3  -9   3   -0.69    2.48
   2   9  -3    1.05    1.87
   2   9  -3    2.85    1.72
   2   9  -3    4.32    1.92
   2   9  -3   -1.07    2.00
  -2  -9   3    3.90    1.81
  -2  -9   3    3.11    2.28
  -2  -9   3    3.71    1.90
  -2  -9   3    4.39    1.84
   1   9  -3    9.45    2.01
   1   9  -3   12.37    2.52
   1   9  -3   12.19    2.19
   1   9  -3    9.78    2.86
  -1  -9   3    6.99    2.04
  -1  -9   3    9.23    2.01
  -1  -9   3   11.24    2.11
  -1  -9   3   11.78    2.79
   0   9  -3    3.96    1.98
   0   9  -3   -1.60    1.76
   0   9  -3    2.43    2.52
   0  -9   3    3.39    1.84
   0  -9   3    0.29    1.78
  -1   9  -3    0.06    1.72
  -1   9  -3    5.40    2.19
   1  -9   3    0.70    1.73
   1  -9   3    6.01    2.04
  -2   9  -3    8.60    2.19
  -2   9  -3    4.07    2.46
   2  -9   3    4.73    2.04
   2  -9   3    6.56    2.13
  -3   9  -3    4.25    2.11
  -3   9  -3    2.10    2.39
  -3   9  -3    2.28    1.74
   3  -9   3    3.40    1.95
   3  -9   3    0.77    1.96
  -4   9  -3    2.92    2.57
  -4   9  -3    3.10    2.11
  -4   9  -3    1.62    1.80
   4  -9   3    4.96    1.89
   4  -9   3    3.45    1.97
   4  -9   3    1.07    2.10
   9   8  -3   10.01    2.60
   9   8  -3    7.12    2.97
  -9  -8   3   13.07    2.92
  -9  -8   3   10.54    4.16
   8   8  -3   -1.31    2.41
   8   8  -3    2.42    1.97
  -8  -8   3    3.22    2.01
  -8  -8   3    0.68    2.79
   7   8  -3   12.03    2.99
   7   8  -3    3.45    2.57
  -7  -8   3    5.83    3.09
  -7  -8   3    4.52    2.06
   6   8  -3   12.49    2.83
   6   8  -3   13.57    3.04
   6   8  -3   11.15    2.79
  -6  -8   3    9.56    2.89
  -6  -8   3    9.39    2.27
  -6  -8   3   11.53    2.51
   5   8  -3   16.64    3.12
   5   8  -3   16.50    2.52
   5   8  -3   10.31    2.76
   5   8  -3   16.26    3.10
  -5  -8   3   14.38    1.99
  -5  -8   3   14.46    3.46
  -5  -8   3   15.08    2.56
  -5  -8   3   14.89    2.85
   4   8  -3   35.17    2.71
   4   8  -3   37.69    3.45
   4   8  -3   36.31    3.82
   4   8  -3   36.38    3.57
  -4  -8   3   37.78    3.17
  -4  -8   3   39.00    4.40
  -4  -8   3   32.99    2.60
  -4  -8   3   31.15    3.60
   3   8  -3    2.13    2.00
   3   8  -3    2.48    1.61
   3   8  -3   -0.09    2.15
  -3  -8   3   -0.59    1.52
  -3  -8   3    4.32    1.90
  -3  -8   3    0.55    1.31
  -3  -8   3    1.65    2.21
   2   8  -3   30.81    3.51
   2   8  -3   29.17    2.42
   2   8  -3   26.80    3.09
  -2  -8   3   25.14    2.88
  -2  -8   3   28.74    2.94
  -2  -8   3   29.07    2.58
  -2  -8   3   25.80    3.53
   1   8  -3    1.41    1.77
   1   8  -3    4.14    1.61
   1   8  -3    3.66    2.20
  -1  -8   3    3.62    1.54
  -1  -8   3    4.24    1.75
  -1  -8   3    2.34    1.71
  -1  -8   3    3.07    2.19
   0   8  -3    3.56    2.38
   0   8  -3    2.63    1.72
   0   8  -3    3.47    1.68
   0  -8   3    2.07    1.72
   0  -8   3    3.90    1.98
   0  -8   3    2.48    1.76
   0  -8   3    2.02    1.43
  -1   8  -3    2.50    2.32
  -1   8  -3    6.31    1.51
  -1   8  -3    4.92    1.89
  -1   8  -3    3.00    2.00
   1  -8   3    5.48    1.45
   1  -8   3    4.37    1.86
   1  -8   3    3.51    1.72
  -2   8  -3    5.77    2.48
  -2   8  -3    2.56    1.83
  -2   8  -3    3.54    1.55
   2  -8   3    4.96    1.58
   2  -8   3    4.44    1.94
   2  -8   3    5.61    1.98
  -3   8  -3    3.16    1.55
  -3   8  -3    3.25    2.40
  -3   8  -3    2.23    1.88
   3  -8   3    1.54    1.89
   3  -8   3   -0.03    1.77
   3  -8   3    3.75    1.51
  -4   8  -3    3.98    1.77
  -4   8  -3    6.76    2.45
  -4   8  -3    7.65    2.24
   4  -8   3    3.02    1.97
   4  -8   3    1.57    2.03
   4  -8   3    4.38    1.73
  -5   8  -3    2.45    2.23
  -5   8  -3    0.52    1.99
  -5   8  -3    2.95    1.89
   5  -8   3    0.22    2.08
   5  -8   3    4.73    1.89
   5  -8   3    2.62    2.08
  10   7  -3    3.36    2.47
  10   7  -3    0.45    2.43
 -10  -7   3    1.64    2.00
 -10  -7   3    4.08    3.72
 -10  -7   3    1.33    2.92
   9   7  -3    2.00    2.41
   9   7  -3    3.46    2.47
  -9  -7   3    0.54    1.80
  -9  -7   3   -0.03    3.03
  -9  -7   3    0.39    2.64
   8   7  -3    4.39    2.34
   8   7  -3    0.97    2.26
  -8  -7   3    1.43    2.87
  -8  -7   3    1.33    2.30
  -8  -7   3   -0.73    1.69
   7   7  -3   -3.19    1.96
   7   7  -3    2.94    2.46
   7   7  -3    5.22    2.45
  -7  -7   3    2.34    2.14
  -7  -7   3    1.37    2.67
  -7  -7   3    4.39    1.93
  -7  -7   3   -1.97    2.09
   6   7  -3    0.56    2.04
   6   7  -3   -1.21    1.95
   6   7  -3   -0.36    2.01
   6   7  -3   -3.16    1.55
  -6  -7   3   -0.10    1.09
  -6  -7   3    1.14    1.68
  -6  -7   3    1.71    2.04
  -6  -7   3    1.19    2.55
   5   7  -3    4.09    2.13
   5   7  -3    2.70    1.59
   5   7  -3    0.27    2.03
   5   7  -3    5.20    1.93
  -5  -7   3    4.43    1.85
  -5  -7   3    3.59    1.96
  -5  -7   3    3.30    2.46
  -5  -7   3    1.56    1.19
   4   7  -3    2.44    1.60
   4   7  -3    1.78    1.44
   4   7  -3    3.18    2.12
  -4  -7   3    0.53    1.17
  -4  -7   3    2.21    1.76
  -4  -7   3    2.76    2.22
  -4  -7   3    2.52    1.59
   3   7  -3   13.69    2.40
   3   7  -3   12.90    2.52
   3   7  -3   16.03    2.09
  -3  -7   3    9.30    2.02
  -3  -7   3   12.05    2.78
  -3  -7   3   13.56    1.80
  -3  -7   3   12.68    2.25
   2   7  -3    1.73    1.90
   2   7  -3   -0.85    1.34
   2   7  -3   -1.74    1.44
  -2  -7   3    0.63    1.16
  -2  -7   3    2.07    2.07
  -2  -7   3    0.76    1.57
  -2  -7   3   -1.80    1.01
   1   7  -3    4.63    1.84
   1   7  -3    3.21    1.58
   1   7  -3    1.66    1.97
  -1  -7   3    4.26    1.94
  -1  -7   3    2.23    1.41
  -1  -7   3    4.70    1.62
  -1  -7   3    1.55    1.44
   0   7  -3   29.45    1.89
   0   7  -3   31.39    3.31
   0   7  -3   30.45    2.39
   0   7  -3   31.58    2.50
   0  -7   3   31.61    2.86
   0  -7   3   29.72    2.50
   0  -7   3   29.11    1.86
   0  -7   3   28.59    2.57
   0  -7   3   30.63    2.41
  -1   7  -3    8.73    1.97
  -1   7  -3    5.65    1.32
  -1   7  -3   11.47    2.51
  -1   7  -3   10.49    2.04
   1  -7   3    8.86    1.62
   1  -7   3    8.41    1.43
   1  -7   3    8.49    1.95
   1  -7   3    7.05    1.73
   1  -7   3    8.12    1.98
  -2   7  -3    0.37    1.18
  -2   7  -3    0.68    1.56
  -2   7  -3    0.95    2.11
   2  -7   3    2.59    1.24
   2  -7   3    2.83    1.70
   2  -7   3    1.22    1.70
  -3   7  -3    1.76    2.03
  -3   7  -3    1.51    1.72
  -3   7  -3    0.55    1.56
   3  -7   3    2.36    1.49
   3  -7   3    0.06    1.63
   3  -7   3    3.51    1.96
  -4   7  -3    2.46    1.89
  -4   7  -3    0.14    1.67
  -4   7  -3   -2.34    1.91
   4  -7   3    0.38    1.36
   4  -7   3    0.35    1.86
   4  -7   3   -0.15    1.73
  -5   7  -3    3.19    1.94
  -5   7  -3    0.73    1.81
  -5   7  -3    5.20    2.30
   5  -7   3   -1.84    2.06
   5  -7   3    0.12    1.89
   5  -7   3    2.24    1.66
  -6   7  -3    1.57    1.95
  -6   7  -3    1.02    1.55
  -6   7  -3    3.09    2.41
   6  -7   3    2.05    1.75
   6  -7   3   -0.80    2.24
   6  -7   3   -0.19    2.06
  10   6  -3    4.35    2.56
  10   6  -3    1.15    2.12
 -10  -6   3    2.37    1.90
 -10  -6   3    2.80    2.73
 -10  -6   3    4.03    3.52
   9   6  -3   -0.62    2.00
   9   6  -3    2.16    1.78
  -9  -6   3    0.61    2.29
  -9  -6   3    2.78    2.07
  -9  -6   3   -1.43    3.03
   8   6  -3   -1.02    1.89
   8   6  -3    1.42    2.71
   8   6  -3    3.90    2.23
   8   6  -3    1.49    2.12
  -8  -6   3    1.43    2.79
  -8  -6   3   -0.27    2.03
  -8  -6   3    1.38    2.13
  -8  -6   3    1.78    1.68
   7   6  -3    4.62    2.19
   7   6  -3    4.69    1.91
   7   6  -3    2.26    2.12
   7   6  -3    2.78    1.67
  -7  -6   3    4.59    2.23
  -7  -6   3    2.88    1.71
  -7  -6   3    7.91    3.06
  -7  -6   3    4.98    2.34
   6   6  -3    1.43    1.48
   6   6  -3   -1.13    1.82
   6   6  -3    3.46    2.12
   6   6  -3    0.94    1.46
  -6  -6   3    0.62    1.86
  -6  -6   3    1.21    1.03
  -6  -6   3    0.56    1.33
  -6  -6   3    0.04    2.26
  -6  -6   3    0.69    1.55
   5   6  -3    0.46    1.35
   5   6  -3   -2.43    1.54
   5   6  -3   -0.59    1.72
  -5  -6   3   -0.11    0.95
  -5  -6   3    0.57    2.14
  -5  -6   3   -0.98    1.53
  -5  -6   3    0.39    1.67
  -5  -6   3    0.62    1.47
   4   6  -3    8.10    2.05
   4   6  -3   11.85    1.81
   4   6  -3    8.32    2.14
  -4  -6   3    8.89    2.61
  -4  -6   3    8.62    1.29
  -4  -6   3    8.98    2.08
  -4  -6   3    7.28    1.74
  -4  -6   3    9.12    2.11
   3   6  -3   11.08    2.25
   3   6  -3    8.54    1.53
   3   6  -3    9.50    2.00
  -3  -6   3   10.33    2.01
  -3  -6   3    8.18    2.30
  -3  -6   3   10.40    1.88
  -3  -6   3    7.69    1.30
   2   6  -3    1.02    1.45
   2   6  -3    4.90    1.37
   2   6  -3    1.46    1.75
  -2  -6   3    2.31    1.40
  -2  -6   3    2.40    1.38
  -2  -6   3    2.62    1.78
  -2  -6   3    1.30    0.41
  -2  -6   3    1.94    1.02
   1   6  -3    5.14    1.64
   1   6  -3    4.40    0.79
   1   6  -3    5.10    1.41
   1   6  -3    6.43    2.00
  -1  -6   3    6.24    1.87
  -1  -6   3    4.63    1.20
  -1  -6   3    5.51    0.78
  -1  -6   3    5.97    1.55
  -1  -6   3    4.81    1.42
   0   6  -3    5.60    1.93
   0   6  -3    7.10    1.08
   0   6  -3    6.14    1.55
   0   6  -3    4.71    1.49
   0  -6   3    5.18    1.73
   0  -6   3    4.65    1.30
   0  -6   3    6.77    1.45
   0  -6   3    6.86    1.05
   0  -6   3    4.34    1.34
  -1   6  -3   11.45    1.62
  -1   6  -3   11.15    1.44
  -1   6  -3   11.01    1.84
  -1   6  -3   10.91    2.34
  -1   6  -3   10.30    1.66
   1  -6   3   10.28    1.89
   1  -6   3   10.20    1.31
   1  -6   3    8.87    1.46
   1  -6   3    9.72    1.86
   1  -6   3   11.46    1.72
  -2   6  -3    0.78    1.42
  -2   6  -3    0.92    1.08
  -2   6  -3   -0.78    1.70
  -2   6  -3   -1.57    1.26
   2  -6   3    0.04    0.92
   2  -6   3   -0.13    1.25
   2  -6   3   -0.89    1.41
   2  -6   3    1.31    1.21
   2  -6   3    1.35    0.95
  -3   6  -3    3.29    2.08
  -3   6  -3    6.23    1.92
  -3   6  -3    8.51    1.67
   3  -6   3    6.73    1.94
   3  -6   3    7.14    1.57
   3  -6   3    6.02    1.78
  -4   6  -3   -0.14    1.59
  -4   6  -3    0.28    1.65
  -4   6  -3    1.20    1.99
   4  -6   3   -0.47    1.99
   4  -6   3    1.90    1.63
   4  -6   3    3.77    1.76
  -5   6  -3    0.89    1.82
  -5   6  -3    0.50    1.78
  -5   6  -3   -0.12    1.56
   5  -6   3   -0.09    1.36
   5  -6   3   -1.39    1.85
   5  -6   3    0.69    1.53
  -6   6  -3    1.74    1.90
  -6   6  -3    1.11    1.91
  -6   6  -3   -1.14    1.69
   6  -6   3   -0.22    2.01
   6  -6   3   -1.16    1.60
   6  -6   3    0.29    1.90
  -7   6  -3    2.31    2.12
  -7   6  -3    0.52    1.98
  -7   6  -3    2.97    2.03
   7  -6   3   -0.20    1.94
   7  -6   3   -0.19    2.17
   7  -6   3    0.43    1.71
  10   5  -3    0.77    2.43
  10   5  -3    6.68    2.33
 -10  -5   3    1.35    3.58
 -10  -5   3    1.70    2.46
 -10  -5   3    4.38    2.17
   9   5  -3    0.92    1.88
   9   5  -3    1.46    1.54
   9   5  -3    1.13    2.14
   9   5  -3    3.09    2.33
  -9  -5   3   -1.42    2.19
  -9  -5   3   -0.45    1.76
  -9  -5   3    2.75    2.36
  -9  -5   3    2.90    3.09
   8   5  -3   16.32    2.86
   8   5  -3   14.88    2.72
   8   5  -3   15.50    3.01
   8   5  -3   17.74    2.21
  -8  -5   3   16.65    3.76
  -8  -5   3   12.51    2.76
  -8  -5   3   12.19    2.18
  -8  -5   3   14.71    2.84
   7   5  -3    5.35    2.25
   7   5  -3    3.88    1.56
   7   5  -3    1.62    1.90
   7   5  -3    6.87    2.17
  -7  -5   3    3.64    1.21
  -7  -5   3    2.10    1.58
  -7  -5   3    2.26    2.11
  -7  -5   3    5.19    2.75
  -7  -5   3    3.33    2.04
   6   5  -3   12.56    2.35
   6   5  -3   10.32    2.18
   6   5  -3   15.67    1.96
  -6  -5   3   16.64    2.16
  -6  -5   3   12.76    3.08
  -6  -5   3   14.31    2.45
  -6  -5   3   15.61    1.52
  -6  -5   3   11.69    2.42
   5   5  -3   19.22    2.48
   5   5  -3   15.98    1.94
   5   5  -3   15.28    2.17
  -5  -5   3   17.72    2.22
  -5  -5   3   15.41    1.38
  -5  -5   3   15.29    2.45
  -5  -5   3   19.22    2.16
  -5  -5   3   20.47    3.26
   4   5  -3   29.00    2.19
   4   5  -3   35.52    2.64
   4   5  -3   28.35    2.57
  -4  -5   3   26.55    2.21
  -4  -5   3   27.26    2.98
  -4  -5   3   30.04    1.66
  -4  -5   3   27.86    2.69
  -4  -5   3   26.53    2.44
   3   5  -3   17.44    2.26
   3   5  -3   16.70    2.16
   3   5  -3   16.15    1.85
  -3  -5   3   16.57    2.67
  -3  -5   3   16.81    1.41
  -3  -5   3   18.35    2.07
  -3  -5   3   14.93    1.84
  -3  -5   3   16.26    2.19
   2   5  -3    5.24    1.44
   2   5  -3    5.66    1.68
   2   5  -3    5.05    1.36
  -2  -5   3    4.50    1.77
  -2  -5   3    1.88    0.93
  -2  -5   3    4.28    1.34
  -2  -5   3    3.62    0.34
  -2  -5   3    1.98    1.28
  -2  -5   3    3.96    0.33
   1   5  -3   40.02    2.31
   1   5  -3   42.11    2.72
   1   5  -3   42.74    2.31
   1   5  -3   41.53    1.51
  -1  -5   3   42.33    2.66
  -1  -5   3   41.90    2.14
  -1  -5   3   44.98    3.04
  -1  -5   3   43.13    1.52
  -1  -5   3   45.34    2.50
   0   5  -3    0.27    0.73
   0   5  -3   -0.06    1.05
   0   5  -3    0.53    0.99
   0   5  -3   -0.13    1.50
   0   5  -3    0.07    0.98
   0  -5   3    2.07    0.99
   0  -5   3   -1.35    1.12
   0  -5   3    0.15    0.92
   0  -5   3   -0.28    1.12
  -1   5  -3   11.00    1.72
  -1   5  -3    8.35    1.36
  -1   5  -3    9.34    1.97
  -1   5  -3   10.30    1.26
   1  -5   3   10.75    1.77
   1  -5   3    9.72    1.39
   1  -5   3    9.29    1.71
   1  -5   3    8.08    1.39
  -2   5  -3    7.40    1.32
  -2   5  -3    8.39    1.73
  -2   5  -3    5.79    1.41
  -2   5  -3    6.80    1.88
  -2   5  -3    7.94    1.38
   2  -5   3    8.17    1.50
   2  -5   3    8.46    1.79
   2  -5   3    7.76    1.53
   2  -5   3    7.50    1.22
  -3   5  -3   -0.64    1.01
  -3   5  -3   -0.75    1.36
  -3   5  -3   -0.24    1.54
  -3   5  -3    1.16    1.32
   3  -5   3    2.29    1.06
   3  -5   3    0.93    1.60
   3  -5   3    1.39    1.38
   3  -5   3    0.46    0.79
  -4   5  -3    2.81    1.81
  -4   5  -3    3.30    1.47
  -4   5  -3    4.67    1.58
   4  -5   3    1.66    1.59
   4  -5   3    5.00    1.91
  -5   5  -3   -1.64    1.57
  -5   5  -3   -2.64    1.50
  -5   5  -3   -1.05    1.41
   5  -5   3    0.98    1.91
   5  -5   3    3.66    1.75
   5  -5   3    0.74    1.46
  -6   5  -3    4.33    1.62
  -6   5  -3    6.89    2.15
  -6   5  -3    1.36    1.89
   6  -5   3    2.54    2.11
   6  -5   3    2.68    1.54
   6  -5   3    3.76    1.77
  -7   5  -3    3.18    1.97
  -7   5  -3    4.65    2.23
  -7   5  -3    2.84    2.05
   7  -5   3   -0.66    1.80
   7  -5   3    2.07    1.84
   7  -5   3    0.06    2.06
  -8   5  -3    0.27    1.95
  -8   5  -3    3.88    2.27
  -8   5  -3    2.57    2.26
   8  -5   3    2.84    1.97
   8  -5   3   -2.64    2.12
   8  -5   3    0.68    1.93
  11   4  -3    3.82    2.08
  11   4  -3    1.54    2.01
 -11  -4   3   -1.13    3.04
 -11  -4   3   -2.02    2.41
  10   4  -3    5.34    2.13
  10   4  -3    3.35    1.98
  10   4  -3    3.45    1.71
 -10  -4   3    0.89    3.16
 -10  -4   3    0.64    1.74
 -10  -4   3   -0.80    2.10
   9   4  -3    9.63    1.95
   9   4  -3    7.08    2.24
   9   4  -3    6.53    2.20
   9   4  -3    7.41    2.49
  -9  -4   3    4.71    2.32
  -9  -4   3    3.16    3.02
  -9  -4   3    7.51    2.01
  -9  -4   3    6.60    2.50
   8   4  -3    0.92    1.38
   8   4  -3    4.33    2.09
   8   4  -3   -0.17    1.84
   8   4  -3    0.54    1.80
  -8  -4   3    1.85    2.01
  -8  -4   3   -1.81    1.56
  -8  -4   3    1.47    2.50
  -8  -4   3    0.48    1.81
  -8  -4   3   -0.08    1.15
   7   4  -3   10.25    2.26
   7   4  -3   14.91    2.57
   7   4  -3   13.31    2.38
   7   4  -3   13.28    1.93
   7   4  -3   13.77    1.50
  -7  -4   3   11.14    1.44
  -7  -4   3    8.84    2.54
  -7  -4   3   13.31    2.31
  -7  -4   3   14.24    2.55
  -7  -4   3   15.56    2.18
   6   4  -3    8.66    1.76
   6   4  -3    7.43    1.89
   6   4  -3   10.62    1.69
   6   4  -3    8.54    1.07
  -6  -4   3    8.23    2.62
  -6  -4   3    9.90    2.07
  -6  -4   3    8.26    2.09
  -6  -4   3   11.09    1.78
  -6  -4   3    9.99    1.24
   5   4  -3    1.26    1.11
   5   4  -3   -0.15    1.40
   5   4  -3    0.78    0.56
   5   4  -3    0.27    1.01
  -5  -4   3   -1.67    1.67
  -5  -4   3    1.24    1.15
  -5  -4   3    0.30    1.14
  -5  -4   3   -0.77    1.39
  -5  -4   3    0.53    0.71
   4   4  -3   26.58    0.85
   4   4  -3   25.41    2.26
   4   4  -3   24.74    1.98
   4   4  -3   23.93    1.75
   4   4  -3   23.43    0.86
  -4  -4   3   25.62    1.97
  -4  -4   3   27.21    2.50
  -4  -4   3   29.85    2.90
  -4  -4   3   26.80    2.30
  -4  -4   3   26.22    1.42
   3   4  -3   10.46    1.75
   3   4  -3   11.41    1.50
   3   4  -3   11.63    1.91
  -3  -4   3   10.06    2.00
  -3  -4   3   11.76    1.81
  -3  -4   3    8.70    0.97
  -3  -4   3    8.69    1.45
  -3  -4   3   11.23    1.67
   2   4  -3   33.04    1.97
   2   4  -3   32.51    0.81
   2   4  -3   30.22    2.12
   2   4  -3   29.76    2.03
  -2  -4   3   29.30    2.09
  -2  -4   3   36.20    1.63
  -2  -4   3   27.61    2.25
  -2  -4   3   31.38    0.80
  -2  -4   3   33.39    2.67
  -2  -4   3   32.25    2.04
   1   4  -3    1.18    1.06
   1   4  -3    0.66    0.48
   1   4  -3   -0.43    1.32
   1   4  -3   -0.98    1.11
   1   4  -3    0.50    0.95
  -1  -4   3   -0.80    1.09
  -1  -4   3   -0.19    1.33
  -1  -4   3   -0.70    0.99
  -1  -4   3   -0.55    0.97
  -1  -4   3    0.75    0.81
   0   4  -3   61.41    2.68
   0   4  -3   60.31    2.10
   0   4  -3   61.95    2.95
   0   4  -3   59.60    2.37
   0  -4   3   61.29    2.67
   0  -4   3   61.41    2.80
   0  -4   3   61.30    3.00
   0  -4   3   61.91    2.36
  -1   4  -3   26.36    1.62
  -1   4  -3   28.41    1.72
  -1   4  -3   26.32    1.96
  -1   4  -3   27.09    2.22
  -1   4  -3   23.29    1.75
   1  -4   3   27.13    1.83
   1  -4   3   25.55    2.08
   1  -4   3   27.96    1.82
   1  -4   3   28.81    2.10
  -2   4  -3   17.76    1.77
  -2   4  -3   18.19    1.98
  -2   4  -3   17.71    2.15
  -2   4  -3   16.79    1.34
  -2   4  -3   21.29    1.86
   2  -4   3   19.17    1.72
   2  -4   3   18.04    1.77
   2  -4   3   17.70    1.54
   2  -4   3   17.02    2.07
  -3   4  -3   12.15    1.72
  -3   4  -3   13.68    1.64
  -3   4  -3   13.65    2.01
  -3   4  -3   12.12    1.02
  -3   4  -3   13.91    1.54
   3  -4   3   14.10    1.37
   3  -4   3   16.25    1.74
   3  -4   3   12.90    2.01
   3  -4   3   13.92    1.52
  -4   4  -3    5.06    1.49
  -4   4  -3    5.07    1.70
  -4   4  -3    7.53    1.81
   4  -4   3    5.58    1.66
   4  -4   3    7.39    1.27
   4  -4   3    7.24    1.08
   4  -4   3    3.24    1.73
  -5   4  -3    9.31    1.88
  -5   4  -3   11.69    2.12
  -5   4  -3   12.00    2.20
   5  -4   3   14.42    2.50
   5  -4   3   10.98    1.99
  -6   4  -3    1.27    1.72
  -6   4  -3    4.05    1.82
  -6   4  -3    3.02    1.86
   6  -4   3    2.08    1.71
   6  -4   3    0.77    2.17
  -7   4  -3    7.23    2.11
  -7   4  -3    6.30    1.81
  -7   4  -3    4.48    2.07
   7  -4   3    2.77    1.55
   7  -4   3    6.01    2.32
   7  -4   3    6.46    2.10
  -8   4  -3    0.31    1.62
  -8   4  -3    1.41    2.03
  -8   4  -3    2.16    1.64
   8  -4   3    0.40    1.84
   8  -4   3   -2.01    2.02
   8  -4   3    0.32    1.78
  -9   4  -3    0.75    2.18
   9  -4   3   -4.99    2.09
   9  -4   3    4.13    2.16
   9  -4   3    0.20    2.08
  11   3  -3    3.53    1.91
  11   3  -3    8.49    2.11
  11   3  -3    7.05    2.29
 -11  -3   3    0.40    2.25
 -11  -3   3    5.25    2.56
 -11  -3   3   -0.88    2.72
  10   3  -3    4.42    1.90
  10   3  -3    7.44    2.35
  10   3  -3   10.27    2.63
  10   3  -3    8.05    1.80
  10   3  -3    9.61    2.23
  10   3  -3    5.12    2.10
 -10  -3   3    0.64    1.85
 -10  -3   3    4.82    2.98
 -10  -3   3    5.37    2.49
 -10  -3   3    6.61    2.33
 -10  -3   3    4.01    2.16
   9   3  -3    9.82    2.37
   9   3  -3    9.50    2.40
   9   3  -3   11.69    2.06
   9   3  -3   10.99    1.82
   9   3  -3   12.08    2.25
   9   3  -3   10.27    2.27
  -9  -3   3   11.16    3.13
  -9  -3   3    8.77    1.92
  -9  -3   3   12.67    2.65
  -9  -3   3   10.23    2.66
  -9  -3   3    8.62    2.30
  -9  -3   3   10.42    3.31
   8   3  -3    9.07    2.22
   8   3  -3   11.42    1.70
   8   3  -3    9.85    2.32
   8   3  -3   11.94    2.43
   8   3  -3   14.05    2.13
   8   3  -3   12.04    1.82
  -8  -3   3   11.99    1.71
  -8  -3   3   13.55    2.52
  -8  -3   3   12.46    2.09
  -8  -3   3    7.62    2.16
  -8  -3   3   13.10    2.55
  -8  -3   3   12.18    3.06
   7   3  -3   17.12    2.43
   7   3  -3   19.39    1.84
   7   3  -3   16.69    2.50
   7   3  -3   21.72    2.29
   7   3  -3   18.93    2.60
  -7  -3   3   16.58    2.01
  -7  -3   3   19.87    2.70
  -7  -3   3   20.72    2.75
  -7  -3   3   21.47    3.45
  -7  -3   3   17.86    1.68
  -7  -3   3   17.11    2.49
   6   3  -3   10.94    1.61
   6   3  -3   11.38    2.05
   6   3  -3   12.54    1.93
   6   3  -3   12.96    1.38
  -6  -3   3   12.39    1.93
  -6  -3   3   11.42    1.23
  -6  -3   3   13.74    2.14
  -6  -3   3    8.69    2.01
  -6  -3   3   15.72    1.79
  -6  -3   3   11.93    2.64
   5   3  -3  109.39    3.68
   5   3  -3  105.43    2.97
   5   3  -3  102.25    4.01
  -5  -3   3  101.78    2.98
  -5  -3   3  106.26    4.89
  -5  -3   3  103.77    4.12
  -5  -3   3  108.46    4.44
  -5  -3   3   98.37    3.52
   4   3  -3   15.84    1.65
   4   3  -3   17.73    2.05
   4   3  -3   14.88    0.97
  -4  -3   3   18.81    2.58
  -4  -3   3   15.20    2.04
  -4  -3   3   14.08    1.07
  -4  -3   3   14.86    1.56
  -4  -3   3   17.17    2.04
   3   3  -3   60.17    2.41
   3   3  -3   63.56    1.61
   3   3  -3   61.92    2.68
   3   3  -3   54.55    1.62
   3   3  -3   62.16    2.92
  -3  -3   3   61.89    1.86
  -3  -3   3   64.17    2.89
  -3  -3   3   62.66    2.49
  -3  -3   3   62.36    2.88
  -3  -3   3   60.68    3.21
   2   3  -3    0.56    1.13
   2   3  -3    1.25    1.08
   2   3  -3    0.80    0.35
   2   3  -3    0.51    1.22
   2   3  -3    2.26    1.06
  -2  -3   3    0.46    0.58
  -2  -3   3    0.87    1.15
  -2  -3   3   -0.92    1.34
  -2  -3   3    0.97    1.16
  -2  -3   3    1.16    0.33
  -2  -3   3   -0.07    0.93
   1   3  -3    8.56    0.75
   1   3  -3    6.74    1.27
   1   3  -3   10.26    1.41
   1   3  -3   10.12    1.34
  -1  -3   3    8.35    1.39
  -1  -3   3    9.25    0.91
  -1  -3   3    8.56    1.31
  -1  -3   3   11.52    1.88
  -1  -3   3   12.39    1.46
   0   3  -3   33.60    2.10
   0   3  -3   31.75    1.59
   0   3  -3   31.34    1.73
   0   3  -3   34.58    1.46
   0   3  -3   33.72    1.90
   0  -3   3   31.01    1.58
   0  -3   3   31.39    1.98
   0  -3   3   30.30    2.27
   0  -3   3   30.58    2.01
   0  -3   3   33.09    1.54
  -1   3  -3   -0.11    0.72
  -1   3  -3    1.74    1.30
  -1   3  -3    0.27    0.88
  -1   3  -3    0.54    0.83
  -1   3  -3   -1.02    0.67
   1  -3   3    2.69    0.92
   1  -3   3   -0.84    1.05
   1  -3   3    0.04    0.78
   1  -3   3    0.71    1.19
  -2   3  -3    8.19    0.89
  -2   3  -3    7.40    1.18
  -2   3  -3    5.66    1.24
  -2   3  -3    9.03    1.54
  -2   3  -3    8.19    1.48
   2  -3   3   10.52    1.66
   2  -3   3    7.35    1.29
   2  -3   3    8.24    1.24
   2  -3   3    9.11    1.48
  -3   3  -3    9.04    1.27
  -3   3  -3   10.09    0.61
  -3   3  -3    7.90    0.56
  -3   3  -3   10.32    1.52
  -3   3  -3   10.69    1.48
  -3   3  -3   11.72    1.80
   3  -3   3    9.90    1.49
   3  -3   3    9.22    1.26
   3  -3   3   10.72    1.76
   3  -3   3    9.83    1.51
  -4   3  -3   22.86    2.21
  -4   3  -3   22.79    2.34
  -4   3  -3   19.85    1.55
  -4   3  -3   25.10    2.22
   4  -3   3   20.97    1.71
   4  -3   3   21.39    2.08
   4  -3   3   28.51    2.38
   4  -3   3   23.18    1.92
  -5   3  -3    8.24    1.51
  -5   3  -3    9.36    1.70
  -5   3  -3    7.33    1.84
   5  -3   3    9.47    1.80
   5  -3   3    6.06    1.32
   5  -3   3    7.62    1.66
   5  -3   3    5.60    1.85
  -6   3  -3    1.68    1.63
  -6   3  -3    4.17    1.72
  -6   3  -3    1.18    1.33
   6  -3   3    0.51    1.55
   6  -3   3   -1.25    1.68
  -7   3  -3    0.49    1.43
  -7   3  -3    0.19    1.64
  -7   3  -3    3.20    1.83
   7  -3   3    0.54    1.94
   7  -3   3   -0.46    1.56
  -8   3  -3   15.00    2.75
  -8   3  -3   19.91    2.76
  -8   3  -3   13.99    2.70
   8  -3   3   13.03    2.46
   8  -3   3   10.72    2.85
   8  -3   3   12.11    2.41
  -9   3  -3    5.32    2.38
  -9   3  -3    7.55    2.39
   9  -3   3    3.09    1.96
   9  -3   3    2.35    2.10
   9  -3   3    2.07    2.24
  11   2  -3    6.44    1.96
  11   2  -3    3.42    1.88
  11   2  -3   -0.29    1.75
 -11  -2   3    1.95    2.33
 -11  -2   3   -0.41    2.04
 -11  -2   3    4.24    2.04
  10   2  -3    6.78    2.10
  10   2  -3    0.14    1.59
  10   2  -3    0.88    1.51
  10   2  -3    1.84    1.80
 -10  -2   3    3.08    2.13
 -10  -2   3    0.16    1.63
 -10  -2   3    2.79    1.93
 -10  -2   3   -0.10    2.51
 -10  -2   3   -1.19    1.94
   9   2  -3    4.59    1.53
   9   2  -3   -0.48    1.57
   9   2  -3    2.26    1.73
   9   2  -3    2.48    1.83
   9   2  -3    1.48    1.74
   9   2  -3    2.53    1.75
   9   2  -3   -0.52    1.40
  -9  -2   3    0.29    1.98
  -9  -2   3   -1.48    2.29
  -9  -2   3    2.44    1.69
  -9  -2   3    0.43    1.45
  -9  -2   3    4.76    1.79
  -9  -2   3    1.20    1.77
  -9  -2   3    0.82    1.83
   8   2  -3    3.22    1.40
   8   2  -3    2.42    1.35
   8   2  -3    4.79    1.69
   8   2  -3    4.88    1.97
   8   2  -3    2.08    1.84
  -8  -2   3    2.02    1.79
  -8  -2   3    2.48    1.29
  -8  -2   3    2.79    1.99
  -8  -2   3    5.46    1.71
  -8  -2   3    2.15    2.58
  -8  -2   3    2.37    1.41
  -8  -2   3    3.10    1.34
  -8  -2   3    1.64    1.76
   7   2  -3    0.64    1.53
   7   2  -3   -0.35    1.25
   7   2  -3    1.79    1.07
   7   2  -3    3.04    1.60
   7   2  -3   -0.55    1.04
  -7  -2   3    1.03    1.59
  -7  -2   3    0.26    0.97
  -7  -2   3    0.08    1.54
  -7  -2   3   -0.29    1.89
  -7  -2   3    0.63    1.29
  -7  -2   3    0.22    1.48
  -7  -2   3   -0.19    1.23
  -7  -2   3   -0.22    1.00
   6   2  -3    5.84    1.43
   6   2  -3    4.27    1.63
   6   2  -3    5.49    1.04
   6   2  -3    6.84    1.27
  -6  -2   3    7.41    1.83
  -6  -2   3    4.64    1.61
  -6  -2   3    5.01    1.30
  -6  -2   3    5.75    1.05
  -6  -2   3    2.38    1.55
  -6  -2   3    9.97    2.34
   5   2  -3   14.73    1.35
   5   2  -3   14.03    1.85
   5   2  -3   16.61    1.75
  -5  -2   3   13.89    1.98
  -5  -2   3   17.01    2.52
  -5  -2   3   14.37    1.55
  -5  -2   3   13.43    1.16
  -5  -2   3   15.01    1.80
  -5  -2   3   13.56    1.76
   4   2  -3    6.55    0.89
   4   2  -3    5.97    1.57
   4   2  -3    5.23    1.30
  -4  -2   3    3.96    1.70
  -4  -2   3    4.70    0.72
  -4  -2   3    4.60    1.39
  -4  -2   3    5.09    1.13
  -4  -2   3    2.80    1.34
  -4  -2   3    4.71    1.44
   3   2  -3    1.11    0.94
   3   2  -3    2.20    1.13
   3   2  -3    0.40    0.91
   3   2  -3    1.49    0.55
  -3  -2   3    1.27    1.19
  -3  -2   3    1.22    0.94
  -3  -2   3    1.63    0.98
  -3  -2   3    1.14    1.16
  -3  -2   3    1.61    0.85
  -3  -2   3    2.04    0.49
   2   2  -3   79.54    2.63
   2   2  -3   79.40    1.99
   2   2  -3   77.70    2.90
  -2  -2   3   78.35    3.08
  -2  -2   3   81.34    1.94
  -2  -2   3   77.63    2.71
  -2  -2   3   77.36    3.40
  -2  -2   3   81.36    2.57
   1   2  -3    1.07    0.47
   1   2  -3    1.47    0.98
   1   2  -3    0.51    0.88
   1   2  -3    0.40    0.79
  -1  -2   3    1.47    0.49
  -1  -2   3    1.13    0.88
  -1  -2   3    1.16    1.00
  -1  -2   3    1.11    1.23
  -1  -2   3    0.43    0.84
   0   2  -3    3.75    0.73
   0   2  -3    3.77    0.86
   0   2  -3    3.92    1.03
   0   2  -3    3.54    1.07
   0   2  -3    4.26    1.10
   0  -2   3    2.89    1.00
   0  -2   3    2.34    1.06
   0  -2   3    2.25    0.69
   0  -2   3    3.37    0.85
   0  -2   3    2.63    1.23
  -1   2  -3   34.26    1.87
  -1   2  -3   36.59    1.62
  -1   2  -3   35.96    1.32
  -1   2  -3   37.80    1.97
  -1   2  -3   36.43    1.87
   1  -2   3   36.11    1.64
   1  -2   3   39.14    2.03
   1  -2   3   36.45    1.96
   1  -2   3   35.57    2.10
  -2   2  -3    1.07    1.00
  -2   2  -3    2.19    0.36
  -2   2  -3    1.35    0.91
  -2   2  -3    2.06    1.02
  -2   2  -3    2.27    0.44
  -2   2  -3    1.06    1.08
   2  -2   3    4.11    1.12
   2  -2   3    2.82    0.95
   2  -2   3    1.39    1.17
   2  -2   3    2.37    1.03
  -3   2  -3    5.89    1.20
  -3   2  -3    5.46    1.11
  -3   2  -3    6.32    1.26
  -3   2  -3    6.42    1.27
   3  -2   3    4.34    1.17
   3  -2   3    7.35    1.57
   3  -2   3    6.46    1.29
   3  -2   3    7.11    1.57
  -4   2  -3   57.35    2.52
  -4   2  -3   57.98    2.87
  -4   2  -3   62.59    2.81
  -4   2  -3   56.50    2.36
   4  -2   3   57.61    2.74
   4  -2   3   53.57    2.47
   4  -2   3   61.63    2.81
   4  -2   3   55.44    2.82
  -5   2  -3   24.62    1.74
  -5   2  -3   27.97    2.12
  -5   2  -3   22.46    2.40
  -5   2  -3   24.58    1.96
   5  -2   3   21.75    2.28
   5  -2   3   26.30    0.86
   5  -2   3   26.53    2.30
   5  -2   3   26.21    2.36
   5  -2   3   23.29    2.05
  -6   2  -3    0.90    1.37
  -6   2  -3    1.61    1.22
  -6   2  -3    2.36    1.55
   6  -2   3   -1.32    1.30
   6  -2   3    2.06    1.47
   6  -2   3   -1.39    1.62
   6  -2   3    2.81    1.90
  -7   2  -3    0.02    1.60
  -7   2  -3    0.05    1.64
  -7   2  -3    1.24    1.49
   7  -2   3   -0.87    1.89
   7  -2   3   -2.74    1.33
  -8   2  -3    3.58    1.98
  -8   2  -3    5.09    1.80
  -8   2  -3    2.93    1.95
   8  -2   3    3.69    1.80
   8  -2   3    0.68    1.91
  -9   2  -3   -0.26    1.96
  -9   2  -3    1.80    1.97
   9  -2   3   -0.10    1.64
   9  -2   3   -3.59    2.15
   9  -2   3    1.26    1.71
 -10   2  -3    2.52    2.39
 -10   2  -3    0.27    1.95
  10  -2   3   -1.35    1.93
  10  -2   3   -0.40    2.49
  10  -2   3    1.45    1.82
  11   1  -3    4.87    2.11
  11   1  -3    2.23    1.85
 -11  -1   3   -0.23    1.89
 -11  -1   3   -0.16    1.92
 -11  -1   3   -1.00    2.05
  10   1  -3    7.44    1.99
  10   1  -3    1.03    1.75
  10   1  -3    1.88    1.77
  10   1  -3    2.17    1.79
  10   1  -3    5.85    2.04
 -10  -1   3   -2.89    1.75
 -10  -1   3    0.99    1.83
 -10  -1   3    0.26    2.17
   9   1  -3    3.87    1.93
   9   1  -3    3.93    1.71
   9   1  -3    3.17    1.44
   9   1  -3    0.00    1.44
   9   1  -3    4.31    1.81
   9   1  -3    4.22    2.00
  -9  -1   3    3.43    2.04
  -9  -1   3    1.15    1.58
  -9  -1   3    3.94    1.81
  -9  -1   3    3.78    2.69
  -9  -1   3    1.85    1.59
  -9  -1   3    2.80    1.90
  -9  -1   3    4.00    2.23
   8   1  -3   10.01    2.26
   8   1  -3    3.84    1.46
   8   1  -3    7.64    1.92
   8   1  -3    8.64    1.99
   8   1  -3    8.77    1.61
   8   1  -3    7.68    1.82
  -8  -1   3    5.30    1.72
  -8  -1   3    6.39    2.40
  -8  -1   3    6.14    1.66
  -8  -1   3    4.21    1.55
  -8  -1   3    6.88    1.89
  -8  -1   3    7.62    1.90
  -8  -1   3    7.98    2.08
  -8  -1   3    3.56    1.69
   7   1  -3    9.12    1.64
   7   1  -3    9.18    1.80
   7   1  -3    8.00    1.44
   7   1  -3   10.75    1.86
   7   1  -3   11.39    2.16
  -7  -1   3    8.07    2.32
  -7  -1   3    7.11    1.79
  -7  -1   3    8.18    1.73
  -7  -1   3    6.66    1.44
  -7  -1   3    6.69    1.37
  -7  -1   3    6.69    1.97
  -7  -1   3    6.87    1.49
  -7  -1   3    8.19    1.90
   6   1  -3    1.06    1.13
   6   1  -3    1.76    0.92
   6   1  -3    0.74    1.35
   6   1  -3    0.05    1.17
  -6  -1   3   -0.11    0.86
  -6  -1   3    1.54    1.32
  -6  -1   3    2.92    1.27
  -6  -1   3   -0.65    1.37
  -6  -1   3    1.07    1.58
  -6  -1   3   -0.33    0.98
  -6  -1   3    0.52    0.86
  -6  -1   3    1.63    1.36
   5   1  -3   10.27    1.11
   5   1  -3    7.42    1.16
   5   1  -3    8.69    1.51
   5   1  -3   10.81    1.55
  -5  -1   3    7.26    1.62
  -5  -1   3    8.63    1.49
  -5  -1   3    8.32    1.69
  -5  -1   3    9.48    1.48
  -5  -1   3    7.90    0.99
  -5  -1   3    8.63    2.03
  -5  -1   3    7.28    1.10
   4   1  -3   16.62    1.10
   4   1  -3   16.85    1.29
   4   1  -3   17.41    1.98
   4   1  -3   16.31    1.71
   4   1  -3   18.85    1.73
  -4  -1   3   20.49    2.03
  -4  -1   3   16.69    1.22
  -4  -1   3   19.14    1.91
  -4  -1   3   19.06    1.96
  -4  -1   3   18.60    2.10
  -4  -1   3   16.20    1.09
  -4  -1   3   18.67    1.63
   3   1  -3   58.65    2.60
   3   1  -3   60.55    1.97
   3   1  -3   57.47    2.31
   3   1  -3   63.32    2.61
  -3  -1   3   59.04    2.56
  -3  -1   3   59.19    1.65
  -3  -1   3   62.23    2.57
  -3  -1   3   59.29    2.03
  -3  -1   3   59.24    2.66
  -3  -1   3   57.37    2.92
   2   1  -3   21.46    1.47
   2   1  -3   24.95    1.70
   2   1  -3   24.38    1.14
   2   1  -3   22.73    0.67
   2   1  -3   20.61    1.64
  -2  -1   3   22.70    0.68
  -2  -1   3   23.00    1.61
  -2  -1   3   21.98    1.96
  -2  -1   3   23.03    1.75
  -2  -1   3   23.40    1.24
  -2  -1   3   21.50    1.60
   1   1  -3  134.01    3.57
   1   1  -3  127.70    2.68
   1   1  -3  133.19    3.48
   1   1  -3  133.67    3.05
  -1  -1   3  132.59    3.49
  -1  -1   3  131.71    3.77
  -1  -1   3  123.48    2.67
  -1  -1   3  129.53    2.68
  -1  -1   3  129.99    4.07
  -1  -1   3  130.64    3.33
   0   1  -3   48.87    1.56
   0   1  -3   46.18    1.77
   0   1  -3   48.37    1.96
   0   1  -3   45.25    1.78
   0  -1   3   46.89    2.11
   0  -1   3   45.40    1.64
   0  -1   3   44.68    2.25
   0  -1   3   45.05    1.41
   0  -1   3   46.60    1.85
  -1   1  -3  183.03    4.17
  -1   1  -3  175.87    4.27
  -1   1  -3  172.12    4.23
  -1   1  -3  170.41    3.78
  -1   1  -3  174.11    4.56
  -1   1  -3  175.21    4.49
   1  -1   3  184.06    4.65
   1  -1   3  177.03    4.48
   1  -1   3  176.44    4.17
   1  -1   3  184.12    4.94
   1  -1   3  179.37    3.81
  -2   1  -3    1.71    0.96
  -2   1  -3    1.47    0.87
  -2   1  -3    1.51    0.81
  -2   1  -3    1.04    0.95
  -2   1  -3    1.15    0.84
   2  -1   3    2.69    1.11
   2  -1   3    2.29    1.30
   2  -1   3    2.59    1.09
   2  -1   3    2.61    0.87
  -3   1  -3    0.49    0.76
  -3   1  -3    0.26    0.89
  -3   1  -3    0.62    0.96
  -3   1  -3   -0.37    1.04
  -3   1  -3   -0.16    0.87
   3  -1   3    1.20    1.07
   3  -1   3    0.18    1.27
   3  -1   3    2.19    1.21
   3  -1   3    0.30    0.92
  -4   1  -3    5.22    1.13
  -4   1  -3    5.78    1.13
  -4   1  -3    4.92    1.35
  -4   1  -3    6.31    1.26
  -4   1  -3    4.69    1.05
   4  -1   3    4.51    1.22
   4  -1   3    3.75    1.50
   4  -1   3    4.55    0.44
   4  -1   3    5.22    0.46
   4  -1   3    4.25    1.26
   4  -1   3    4.73    1.47
  -5   1  -3   -0.63    0.85
  -5   1  -3    1.95    1.23
  -5   1  -3    0.83    0.60
  -5   1  -3   -0.30    0.96
  -5   1  -3    2.57    1.04
   5  -1   3    0.55    0.44
   5  -1   3   -2.07    1.02
   5  -1   3   -1.28    1.26
   5  -1   3    0.40    1.12
   5  -1   3    0.43    1.32
  -6   1  -3    5.12    1.21
  -6   1  -3    6.82    1.47
  -6   1  -3    8.05    1.73
  -6   1  -3    4.58    1.54
  -6   1  -3    6.33    1.62
   6  -1   3    6.67    0.86
   6  -1   3    6.14    1.29
   6  -1   3    4.77    1.87
   6  -1   3    7.41    1.62
   6  -1   3    3.53    1.71
   6  -1   3    3.90    1.47
  -7   1  -3    1.19    1.58
  -7   1  -3    0.90    1.29
  -7   1  -3   -1.11    1.36
  -7   1  -3    0.90    1.49
   7  -1   3    0.47    1.80
   7  -1   3   -2.00    1.34
   7  -1   3   -0.26    1.37
   7  -1   3   -0.12    1.62
  -8   1  -3    4.97    1.91
  -8   1  -3    2.39    1.45
  -8   1  -3    6.42    1.88
  -8   1  -3    4.24    1.97
   8  -1   3    5.41    1.57
   8  -1   3    5.97    2.13
  -9   1  -3    2.41    1.87
  -9   1  -3    4.86    2.11
   9  -1   3   -1.85    1.87
   9  -1   3    1.29    1.84
 -10   1  -3   10.39    2.61
 -10   1  -3   10.40    2.49
  10  -1   3    8.22    2.05
  10  -1   3   11.85    2.39
  10  -1   3    5.70    2.47
  10   0  -3    2.70    1.90
  10   0  -3   -2.53    1.59
  10   0  -3   -2.55    1.38
 -10   0   3    0.82    2.26
 -10   0   3   -0.74    1.72
 -10   0   3    1.54    2.14
   9   0  -3    4.11    1.88
   9   0  -3    3.96    1.72
   9   0  -3    7.19    2.05
   9   0  -3   10.19    2.11
  -9   0   3    4.47    1.92
  -9   0   3    3.87    1.74
  -9   0   3    4.78    1.99
  -9   0   3    1.62    1.86
  -9   0   3    3.94    4.10
   8   0  -3    2.67    1.62
   8   0  -3   -0.83    1.51
   8   0  -3   -1.36    1.18
   8   0  -3    1.33    1.35
   8   0  -3    3.74    1.34
  -8   0   3   -2.00    1.51
  -8   0   3    1.68    1.89
  -8   0   3   -3.28    1.23
  -8   0   3   -0.81    1.25
  -8   0   3   -0.62    1.25
  -8   0   3    1.63    1.63
  -8   0   3   -0.95    1.47
   7   0  -3   71.10    3.56
   7   0  -3   64.84    3.30
   7   0  -3   68.21    2.85
   7   0  -3   66.88    3.04
   7   0  -3   68.89    3.48
  -7   0   3   64.04    3.16
  -7   0   3   63.66    3.40
  -7   0   3   58.93    2.77
  -7   0   3   75.00    3.79
  -7   0   3   65.30    3.86
  -7   0   3   69.17    3.47
  -7   0   3   69.00    3.47
   6   0  -3   23.33    1.65
   6   0  -3   27.37    1.88
   6   0  -3   25.39    2.07
   6   0  -3   26.44    2.25
   6   0  -3   25.90    2.25
  -6   0   3   27.21    2.23
  -6   0   3   23.23    1.93
  -6   0   3   25.61    2.54
  -6   0   3   24.07    1.79
  -6   0   3   25.60    2.26
  -6   0   3   28.19    2.46
  -6   0   3   25.14    2.21
   5   0  -3   19.45    1.66
   5   0  -3   17.58    1.46
   5   0  -3   19.88    1.78
   5   0  -3   17.53    1.96
  -5   0   3   20.57    1.64
  -5   0   3   17.81    1.92
  -5   0   3   19.20    2.02
  -5   0   3   18.17    1.40
  -5   0   3   17.60    1.99
  -5   0   3   19.20    1.96
  -5   0   3   18.09    1.80
   4   0  -3  217.81    5.88
   4   0  -3  226.67    5.17
   4   0  -3  218.17    5.75
   4   0  -3  228.06    5.57
  -4   0   3  217.01    5.69
  -4   0   3  217.54    5.91
  -4   0   3  219.20    5.91
  -4   0   3  223.46    5.86
  -4   0   3  217.22    6.25
  -4   0   3  224.82    5.15
   3   0  -3    1.21    0.87
   3   0  -3    0.17    0.77
   3   0  -3    0.60    0.55
   3   0  -3    0.30    0.94
  -3   0   3   -0.05    0.54
  -3   0   3   -0.57    0.98
  -3   0   3   -0.38    1.04
  -3   0   3    1.13    0.84
  -3   0   3    0.15    0.94
  -3   0   3   -0.07    0.89
   2   0  -3   89.54    2.78
   2   0  -3   90.74    2.07
   2   0  -3   90.80    2.94
   2   0  -3   87.25    2.06
   2   0  -3   93.31    2.51
  -2   0   3   88.01    3.19
  -2   0   3   91.21    2.95
  -2   0   3   92.91    2.93
  -2   0   3   91.11    2.24
  -2   0   3   89.69    2.88
   1   0  -3   93.16    2.61
   1   0  -3   97.25    2.99
   1   0  -3   94.30    1.91
   1   0  -3   97.58    2.47
   1   0  -3   92.29    2.71
  -1   0   3   92.88    2.84
  -1   0   3   92.48    2.30
  -1   0   3   92.34    1.91
  -1   0   3   90.93    3.05
  -1   0   3   93.23    2.70
  -1   0   3   95.03    2.74
   0   0  -3  106.62    2.89
   0   0  -3  109.20    2.39
   0   0  -3  105.30    2.72
   0   0  -3  101.42    2.68
   0   0   3  105.90    2.70
   0   0   3  109.77    3.20
   0   0   3  103.94    3.40
   0   0   3   99.64    2.39
   0   0   3  108.95    2.74
  -1   0  -3   53.04    1.55
  -1   0  -3   54.56    1.62
  -1   0  -3   53.83    1.93
  -1   0  -3   56.33    2.19
  -1   0  -3   53.33    1.87
  -1   0  -3   53.81    1.69
   1   0   3   54.47    2.45
   1   0   3   51.99    1.51
   1   0   3   56.91    1.98
   1   0   3   55.77    2.24
  -2   0  -3   85.05    2.84
  -2   0  -3   84.50    2.56
  -2   0  -3   87.03    2.70
  -2   0  -3   82.93    1.95
  -2   0  -3   85.14    2.22
  -2   0  -3   83.59    2.57
   2   0   3   92.08    2.92
   2   0   3   84.41    3.07
   2   0   3   87.15    2.78
   2   0   3   88.49    1.96
  -3   0  -3   65.47    2.50
  -3   0  -3   63.29    2.51
  -3   0  -3   66.52    2.45
  -3   0  -3   68.61    2.44
  -3   0  -3   64.41    1.99
   3   0   3   67.41    2.57
   3   0   3   69.46    2.54
   3   0   3   62.87    2.75
   3   0   3   63.63    1.64
   3   0   3   62.29    1.63
  -4   0  -3   50.47    2.37
  -4   0  -3   50.48    2.00
  -4   0  -3   49.41    2.19
  -4   0  -3   45.82    2.36
   4   0   3   49.97    2.80
   4   0   3   50.26    1.58
   4   0   3   48.96    2.50
   4   0   3   52.50    2.42
   4   0   3   54.62    2.52
  -5   0  -3   16.12    1.74
  -5   0  -3   14.97    1.52
  -5   0  -3   16.43    1.38
  -5   0  -3   12.57    1.55
  -5   0  -3   17.67    1.80
   5   0   3   17.31    2.27
   5   0   3   14.79    1.06
   5   0   3   16.64    1.88
   5   0   3   16.93    1.90
   5   0   3   14.35    1.50
   5   0   3   13.19    1.65
  -6   0  -3   29.59    2.34
  -6   0  -3   31.09    2.71
  -6   0  -3   28.52    1.89
  -6   0  -3   31.74    2.43
  -6   0  -3   26.39    2.16
   6   0   3   29.25    2.36
   6   0   3   26.98    2.18
   6   0   3   31.05    2.73
   6   0   3   27.06    2.38
   6   0   3   28.70    2.29
   6   0   3   31.22    1.54
  -7   0  -3   -0.57    1.33
  -7   0  -3   -0.78    1.25
  -7   0  -3    1.90    1.24
  -7   0  -3    1.51    1.45
   7   0   3    0.81    1.39
   7   0   3    1.75    1.21
   7   0   3   -1.12    1.36
   7   0   3   -0.88    1.68
   7   0   3   -1.12    1.40
  -8   0  -3    0.22    1.63
  -8   0  -3    1.34    1.33
  -8   0  -3    2.60    1.45
  -8   0  -3    1.20    1.54
   8   0   3    1.93    1.84
   8   0   3   -1.64    1.63
   8   0   3    3.83    2.28
   8   0   3   -0.67    1.47
  -9   0  -3    7.56    2.14
  -9   0  -3   11.68    2.40
  -9   0  -3   13.29    2.34
   9   0   3    6.87    2.01
   9   0   3    9.56    2.38
 -10   0  -3    7.12    2.17
 -10   0  -3    5.77    2.27
 -10   0  -3    7.57    2.45
  10   0   3    5.28    2.31
  10   0   3    5.16    2.05
  10  -1  -3   -0.24    1.60
  10  -1  -3    5.38    2.07
  10  -1  -3   -1.74    1.80
 -10   1   3    1.86    2.04
 -10   1   3    3.12    2.07
   9  -1  -3    4.52    2.04
   9  -1  -3    5.33    1.91
   9  -1  -3    7.23    2.08
  -9   1   3    4.67    2.07
  -9   1   3    4.80    2.07
  -9   1   3    3.70    1.87
  -9   1   3    8.55    2.32
   8  -1  -3    8.38    1.95
   8  -1  -3    2.82    1.73
   8  -1  -3    1.82    1.42
   8  -1  -3    4.20    1.48
   8  -1  -3    2.80    2.29
   8  -1  -3    3.01    1.68
  -8   1   3    1.42    1.86
  -8   1   3    1.69    1.63
  -8   1   3    3.79    1.82
  -8   1   3   -1.22    1.63
   7  -1  -3    0.29    1.17
   7  -1  -3    1.86    1.25
   7  -1  -3    1.52    1.44
   7  -1  -3    1.03    1.08
   7  -1  -3    0.53    1.44
  -7   1   3   -1.58    1.38
  -7   1   3    1.12    1.55
  -7   1   3    1.39    1.43
  -7   1   3    3.71    1.81
  -7   1   3   -1.21    1.29
  -7   1   3    1.39    1.26
   6  -1  -3    5.46    1.58
   6  -1  -3    8.20    1.65
   6  -1  -3    8.90    1.27
   6  -1  -3    9.56    1.40
   6  -1  -3    8.75    1.36
   6  -1  -3    9.61    1.50
  -6   1   3    7.57    1.69
  -6   1   3    6.63    1.37
  -6   1   3    7.94    1.66
  -6   1   3   10.53    1.67
  -6   1   3    8.01    1.76
  -6   1   3    5.76    1.50
   5  -1  -3   98.55    3.39
   5  -1  -3   95.05    2.85
   5  -1  -3   95.20    3.55
   5  -1  -3   96.36    3.14
   5  -1  -3   97.16    3.69
  -5   1   3  100.69    3.43
  -5   1   3   97.82    3.67
  -5   1   3   94.56    3.56
  -5   1   3   96.26    3.79
  -5   1   3   94.33    3.70
  -5   1   3   96.30    3.43
  -5   1   3   95.97    2.90
   4  -1  -3   45.30    1.99
   4  -1  -3   47.39    2.15
   4  -1  -3   41.89    2.11
   4  -1  -3   46.98    2.44
   4  -1  -3   44.21    1.69
  -4   1   3   47.38    2.38
  -4   1   3   49.12    2.56
  -4   1   3   48.66    1.72
  -4   1   3   49.92    2.43
  -4   1   3   48.75    2.23
  -4   1   3   47.45    2.46
   3  -1  -3    8.42    0.75
   3  -1  -3    9.16    0.95
   3  -1  -3    6.57    1.25
   3  -1  -3    7.23    1.09
   3  -1  -3    7.78    1.16
  -3   1   3    7.74    0.72
  -3   1   3    7.24    1.11
  -3   1   3    7.62    1.30
  -3   1   3    9.38    1.45
  -3   1   3    8.46    1.33
  -3   1   3    7.36    1.15
   2  -1  -3  234.97    5.10
   2  -1  -3  236.42    5.61
   2  -1  -3  248.44    5.54
   2  -1  -3  235.75    5.66
   2  -1  -3  231.67    4.75
  -2   1   3  233.49    5.86
  -2   1   3  242.83    5.73
  -2   1   3  245.88    5.66
  -2   1   3  232.97    4.76
  -2   1   3  234.29    5.58
  -2   1   3  239.75    5.75
   1  -1  -3    5.64    1.05
   1  -1  -3    5.17    0.40
   1  -1  -3    5.09    0.85
   1  -1  -3    5.11    0.54
   1  -1  -3    3.74    0.88
  -1   1   3    4.54    0.40
  -1   1   3    5.48    0.90
  -1   1   3    4.14    1.00
  -1   1   3    5.20    0.96
  -1   1   3    4.97    1.21
   0  -1  -3  469.63    9.29
   0  -1  -3  470.26    9.59
   0  -1  -3  471.56    9.89
   0  -1  -3  460.68    9.52
   0   1   3  458.24    9.41
   0   1   3  474.11   10.19
   0   1   3  474.23    9.90
   0   1   3  434.94    9.25
   0   1   3  467.50    9.66
  -1  -1  -3  104.53    2.67
  -1  -1  -3  102.56    2.23
  -1  -1  -3  105.91    2.64
  -1  -1  -3  101.11    2.79
  -1  -1  -3  101.29    2.22
  -1  -1  -3  100.81    2.70
   1   1   3  112.13    3.10
   1   1   3  103.37    2.22
   1   1   3  103.82    2.68
   1   1   3  109.11    3.29
   1   1   3   98.74    2.70
  -2  -1  -3  351.72    7.55
  -2  -1  -3  343.14    7.59
  -2  -1  -3  338.06    7.87
  -2  -1  -3  346.15    6.80
  -2  -1  -3  351.62    7.44
  -2  -1  -3  354.21    7.64
   2   1   3  357.43    7.68
   2   1   3  346.32    8.25
   2   1   3  348.97    7.93
   2   1   3  345.83    7.24
   2   1   3  347.95    6.80
  -3  -1  -3   68.58    2.43
  -3  -1  -3   69.92    2.41
  -3  -1  -3   67.97    2.62
  -3  -1  -3   74.66    2.59
  -3  -1  -3   69.42    1.83
  -3  -1  -3   69.06    2.28
   3   1   3   66.70    2.57
   3   1   3   70.59    3.01
   3   1   3   71.23    2.74
   3   1   3   69.58    2.07
  -4  -1  -3   74.98    2.61
  -4  -1  -3   71.04    2.76
  -4  -1  -3   73.57    2.75
  -4  -1  -3   74.97    2.86
  -4  -1  -3   72.39    2.20
   4   1   3   76.44    3.16
   4   1   3   71.06    2.87
   4   1   3   69.51    2.27
   4   1   3   72.41    3.39
  -5  -1  -3  263.12    7.23
  -5  -1  -3  278.54    7.03
  -5  -1  -3  280.03    6.98
  -5  -1  -3  275.96    6.87
  -5  -1  -3  274.62    7.05
  -5  -1  -3  274.03    6.38
   5   1   3  264.51    7.17
   5   1   3  280.62    7.37
   5   1   3  287.08    7.15
   5   1   3  267.34    6.34
   5   1   3  283.12    7.83
  -6  -1  -3   25.77    2.14
  -6  -1  -3   27.01    1.97
  -6  -1  -3   25.27    2.23
  -6  -1  -3   25.89    1.70
  -6  -1  -3   23.39    1.87
   6   1   3   24.43    2.22
   6   1   3   26.12    1.67
   6   1   3   23.32    2.28
   6   1   3   25.28    2.15
   6   1   3   21.72    2.37
  -7  -1  -3    0.22    1.18
  -7  -1  -3    1.30    1.11
  -7  -1  -3   -1.37    1.28
  -7  -1  -3    0.49    1.04
   7   1   3    0.77    1.40
   7   1   3    1.47    1.36
   7   1   3   -0.46    1.74
   7   1   3    1.04    1.01
   7   1   3   -1.35    1.44
  -8  -1  -3    5.49    1.54
  -8  -1  -3    1.30    1.61
  -8  -1  -3    3.49    1.60
  -8  -1  -3    4.79    1.75
   8   1   3    4.74    1.83
   8   1   3    3.15    2.30
   8   1   3   -0.03    1.75
   8   1   3    3.19    1.58
  -9  -1  -3    3.48    1.86
  -9  -1  -3    2.24    1.58
  -9  -1  -3    4.28    1.86
   9   1   3    2.85    1.66
   9   1   3   -0.52    1.85
   9   1   3    2.81    2.34
   9   1   3    0.25    1.65
 -10  -1  -3    2.00    2.04
 -10  -1  -3    3.92    1.85
 -10  -1  -3    2.26    1.94
  10   1   3   -0.34    2.00
  10   1   3   -1.88    1.58
 -11  -1  -3    3.45    1.99
 -11  -1  -3   -1.76    1.82
 -11  -1  -3    0.38    2.12
  11   1   3    4.19    1.96
  11   1   3   -1.98    1.98
  11   1   3    1.16    1.87
  10  -2  -3    2.48    2.10
  10  -2  -3   -0.18    1.77
  10  -2  -3    4.62    1.64
 -10   2   3    1.87    2.12
 -10   2   3    0.77    1.94
   9  -2  -3    2.22    1.78
   9  -2  -3    2.77    1.68
   9  -2  -3    3.51    1.96
  -9   2   3    4.57    2.18
  -9   2   3    0.69    1.50
  -9   2   3    3.45    2.16
  -9   2   3    2.82    1.74
   8  -2  -3    2.36    1.77
   8  -2  -3    0.64    1.49
  -8   2   3    3.30    1.79
  -8   2   3    1.09    1.83
  -8   2   3    1.62    1.85
  -8   2   3    1.33    1.70
   7  -2  -3   -1.02    1.20
   7  -2  -3    5.56    1.64
   7  -2  -3    3.87    1.38
   7  -2  -3   -0.10    1.22
   7  -2  -3    1.64    1.17
  -7   2   3    1.68    1.42
  -7   2   3    1.19    1.22
  -7   2   3    0.22    1.64
  -7   2   3    0.00    1.63
   6  -2  -3   31.05    1.92
   6  -2  -3   30.90    2.02
   6  -2  -3   32.36    1.88
   6  -2  -3   26.81    2.13
   6  -2  -3   30.79    2.17
  -6   2   3   30.78    2.00
  -6   2   3   29.02    2.49
  -6   2   3   32.64    2.67
  -6   2   3   29.19    2.14
  -6   2   3   29.91    2.27
  -6   2   3   31.28    2.32
   5  -2  -3   11.77    1.25
   5  -2  -3    8.17    1.58
   5  -2  -3    9.25    1.16
   5  -2  -3    7.51    1.25
  -5   2   3    7.69    1.49
  -5   2   3    9.02    1.23
  -5   2   3    7.74    1.49
  -5   2   3    9.08    1.46
  -5   2   3    8.90    1.66
  -5   2   3    7.99    1.50
   4  -2  -3   26.32    1.56
   4  -2  -3   25.11    1.31
   4  -2  -3   23.13    1.70
   4  -2  -3   25.19    1.65
  -4   2   3   23.71    1.81
  -4   2   3   22.51    1.93
  -4   2   3   22.94    1.77
  -4   2   3   23.60    1.67
  -4   2   3   24.48    1.52
   3  -2  -3  293.91    6.67
   3  -2  -3  286.28    6.10
   3  -2  -3  290.08    6.59
   3  -2  -3  291.28    7.01
  -3   2   3  294.44    6.85
  -3   2   3  293.56    7.12
  -3   2   3  294.01    7.09
  -3   2   3  292.13    6.56
  -3   2   3  298.01    7.26
   2  -2  -3    1.77    0.93
   2  -2  -3    1.79    0.34
   2  -2  -3    1.05    0.81
   2  -2  -3    1.30    0.36
   2  -2  -3    3.20    0.71
   2  -2  -3    0.74    0.87
  -2   2   3    2.45    0.98
  -2   2   3    1.45    0.82
  -2   2   3    1.37    0.71
  -2   2   3    2.28    0.35
  -2   2   3    0.74    0.95
  -2   2   3    1.91    0.85
   1  -2  -3  120.69    3.20
   1  -2  -3  115.92    2.44
   1  -2  -3  122.07    2.95
   1  -2  -3  122.36    3.20
   1  -2  -3  113.37    3.14
  -1   2   3  118.40    3.30
  -1   2   3  116.71    2.45
  -1   2   3  116.38    3.19
  -1   2   3  114.68    3.38
  -1   2   3  116.38    3.29
  -1   2   3  121.94    3.16
   0  -2  -3  184.84    4.17
   0  -2  -3  182.07    4.34
   0  -2  -3  185.97    3.95
   0  -2  -3  180.36    4.13
   0  -2  -3  184.32    4.49
   0   2   3  189.19    4.53
   0   2   3  183.74    4.72
   0   2   3  183.45    4.23
   0   2   3  180.84    4.42
  -1  -2  -3   39.32    1.25
  -1  -2  -3   42.75    1.56
  -1  -2  -3   41.41    1.32
  -1  -2  -3   44.33    1.93
  -1  -2  -3   41.15    1.57
  -1  -2  -3   43.58    1.55
   1   2   3   41.13    1.96
   1   2   3   42.02    2.18
   1   2   3   42.52    1.74
   1   2   3   41.85    1.27
  -2  -2  -3   69.39    2.33
  -2  -2  -3   70.20    2.27
  -2  -2  -3   70.63    1.92
  -2  -2  -3   70.29    1.60
  -2  -2  -3   72.46    2.31
   2   2   3   69.11    2.78
   2   2   3   71.26    2.61
   2   2   3   72.56    1.61
   2   2   3   73.22    2.36
  -3  -2  -3   -0.46    0.69
  -3  -2  -3    0.07    0.58
  -3  -2  -3   -0.56    0.76
  -3  -2  -3   -0.38    0.69
  -3  -2  -3   -0.48    0.74
   3   2   3   -0.42    0.74
   3   2   3   -0.40    1.31
   3   2   3    0.38    0.40
   3   2   3    0.38    0.76
   3   2   3    0.44    1.10
   3   2   3   -0.05    0.43
  -4  -2  -3   13.11    1.68
  -4  -2  -3   14.35    1.26
  -4  -2  -3   13.99    1.35
  -4  -2  -3   12.88    0.96
  -4  -2  -3   13.13    1.58
  -4  -2  -3   11.75    1.38
   4   2   3   11.32    1.56
   4   2   3   13.37    1.76
   4   2   3   14.67    1.71
   4   2   3   14.80    1.43
   4   2   3   12.43    0.98
   4   2   3   15.48    2.21
  -5  -2  -3   27.83    1.90
  -5  -2  -3   28.41    2.07
  -5  -2  -3   26.62    1.60
  -5  -2  -3   29.05    1.96
  -5  -2  -3   24.78    1.45
   5   2   3   30.87    2.16
   5   2   3   27.19    2.28
   5   2   3   29.52    1.51
   5   2   3   28.55    1.76
   5   2   3   29.58    2.57
  -6  -2  -3    8.29    1.22
  -6  -2  -3    7.20    1.41
  -6  -2  -3    6.92    1.28
  -6  -2  -3    8.09    1.51
  -6  -2  -3    7.26    1.61
   6   2   3    7.69    1.64
   6   2   3    9.81    1.84
   6   2   3    6.84    1.98
   6   2   3    8.35    1.35
  -7  -2  -3   58.35    2.80
  -7  -2  -3   58.93    2.66
  -7  -2  -3   62.77    3.20
  -7  -2  -3   59.33    3.07
  -7  -2  -3   60.85    3.25
   7   2   3   62.86    2.80
   7   2   3   61.24    3.64
   7   2   3   57.97    3.22
   7   2   3   59.36    3.79
  -8  -2  -3    3.55    1.35
  -8  -2  -3    4.55    1.86
  -8  -2  -3    4.43    1.62
  -8  -2  -3    7.33    1.91
  -8  -2  -3    4.66    1.44
   8   2   3    3.71    1.75
   8   2   3    3.73    1.31
   8   2   3    3.24    1.39
   8   2   3    1.70    1.98
   8   2   3    0.45    1.80
   8   2   3    2.97    1.54
  -9  -2  -3   15.07    2.58
  -9  -2  -3   13.17    2.41
  -9  -2  -3   17.34    2.44
  -9  -2  -3   21.11    2.48
   9   2   3    8.40    2.29
   9   2   3   14.33    2.28
   9   2   3   14.26    2.95
   9   2   3   17.37    2.54
 -10  -2  -3    6.10    1.95
 -10  -2  -3    0.04    1.87
 -10  -2  -3    1.19    1.77
  10   2   3    3.51    2.44
  10   2   3    1.97    1.81
  10   2   3    1.89    1.69
  10   2   3   -3.65    2.27
 -11  -2  -3    2.75    2.08
 -11  -2  -3    3.41    1.94
 -11  -2  -3    1.24    2.11
  11   2   3    6.50    2.19
  11   2   3    1.50    1.97
  10  -3  -3    7.83    2.28
  10  -3  -3   -2.20    1.96
  10  -3  -3   -0.34    2.05
 -10   3   3    2.84    2.36
 -10   3   3    3.12    2.28
   9  -3  -3    1.95    1.97
   9  -3  -3    1.19    1.76
  -9   3   3    0.53    1.93
  -9   3   3    1.41    2.01
   8  -3  -3   -1.04    1.46
   8  -3  -3   -3.21    1.43
  -8   3   3    0.81    1.83
  -8   3   3    1.18    1.92
  -8   3   3    2.58    1.50
   7  -3  -3   -2.10    1.31
   7  -3  -3    0.65    1.59
   7  -3  -3    0.04    1.35
  -7   3   3    1.14    1.70
  -7   3   3    1.52    1.38
  -7   3   3   -0.60    1.53
  -7   3   3   -2.92    1.40
   6  -3  -3    2.59    0.93
   6  -3  -3    0.42    1.15
   6  -3  -3    1.32    1.46
   6  -3  -3    0.62    1.23
  -6   3   3   -0.03    1.47
  -6   3   3    1.93    1.49
  -6   3   3    2.43    1.72
  -6   3   3    2.98    1.45
   5  -3  -3    4.61    1.30
   5  -3  -3    4.11    1.10
   5  -3  -3    4.20    0.85
   5  -3  -3    2.19    1.40
   5  -3  -3    4.71    0.90
  -5   3   3    4.10    1.44
  -5   3   3    4.68    0.85
  -5   3   3    4.23    1.64
  -5   3   3    5.38    1.09
  -5   3   3    2.78    1.46
   4  -3  -3    9.67    1.10
   4  -3  -3   11.20    1.41
   4  -3  -3   12.49    1.67
   4  -3  -3    9.47    1.00
  -4   3   3   10.59    1.56
  -4   3   3   10.77    1.66
  -4   3   3    9.93    1.08
  -4   3   3   10.86    0.99
  -4   3   3   12.14    1.81
   3  -3  -3   56.62    2.56
   3  -3  -3   54.91    2.29
   3  -3  -3   58.13    1.93
   3  -3  -3   53.42    1.81
  -3   3   3   53.87    2.67
  -3   3   3   55.70    1.77
  -3   3   3   54.57    2.53
  -3   3   3   58.50    2.63
  -3   3   3   53.13    1.91
   2  -3  -3    5.34    1.00
   2  -3  -3    4.60    0.80
   2  -3  -3    2.21    1.03
   2  -3  -3    4.10    0.65
  -2   3   3    6.45    1.15
  -2   3   3    3.11    1.01
  -2   3   3    5.78    1.31
  -2   3   3    5.44    0.94
  -2   3   3    4.08    0.76
   1  -3  -3  134.43    3.49
   1  -3  -3  134.73    3.38
   1  -3  -3  133.79    3.02
   1  -3  -3  134.74    3.57
  -1   3   3  129.13    3.62
  -1   3   3  127.90    3.79
  -1   3   3  128.62    3.75
  -1   3   3  134.27    3.55
  -1   3   3  133.28    3.41
   0  -3  -3    3.63    0.67
   0  -3  -3    4.53    0.84
   0  -3  -3    3.54    0.73
   0  -3  -3    4.33    0.88
   0  -3  -3    4.28    0.92
   0   3   3    4.26    1.17
   0   3   3    3.64    0.97
   0   3   3    4.04    0.76
   0   3   3    3.18    0.96
   0   3   3    3.81    0.96
  -1  -3  -3    3.05    0.66
  -1  -3  -3    2.60    0.55
  -1  -3  -3    2.73    0.95
  -1  -3  -3    2.68    0.48
  -1  -3  -3    2.24    0.82
  -1  -3  -3    3.07    0.81
   1   3   3    3.75    1.10
   1   3   3    2.37    1.22
   1   3   3    3.52    0.77
   1   3   3    3.37    0.94
  -2  -3  -3   47.10    2.30
  -2  -3  -3   48.85    1.97
  -2  -3  -3   50.99    1.25
  -2  -3  -3   48.17    1.86
  -2  -3  -3   52.48    2.00
   2   3   3   53.30    1.65
   2   3   3   54.53    2.46
   2   3   3   46.69    2.59
   2   3   3   48.14    1.23
   2   3   3   48.46    2.15
  -3  -3  -3   -0.32    0.78
  -3  -3  -3    1.80    0.80
  -3  -3  -3   -0.53    0.88
  -3  -3  -3    0.73    0.41
  -3  -3  -3    0.82    0.44
   3   3   3    0.42    1.19
   3   3   3   -0.20    0.75
   3   3   3   -0.75    1.36
   3   3   3    1.06    0.98
   3   3   3    0.84    0.65
  -4  -3  -3    9.87    1.47
  -4  -3  -3   11.71    1.36
  -4  -3  -3    8.96    1.18
  -4  -3  -3    8.86    1.41
  -4  -3  -3   10.06    0.93
   4   3   3   11.70    1.51
   4   3   3   10.91    2.10
   4   3   3   11.37    1.06
   4   3   3   10.62    1.75
   4   3   3   11.81    1.60
  -5  -3  -3   78.59    2.52
  -5  -3  -3   77.90    3.09
  -5  -3  -3   74.17    3.89
  -5  -3  -3   84.28    2.96
  -5  -3  -3   78.25    3.05
   5   3   3   77.87    2.51
   5   3   3   77.79    3.57
   5   3   3   75.37    3.01
   5   3   3   73.35    3.86
  -6  -3  -3    0.99    1.02
  -6  -3  -3   -0.29    1.22
  -6  -3  -3   -0.05    0.82
  -6  -3  -3    0.54    0.85
  -6  -3  -3    0.01    0.88
   6   3   3   -0.97    1.19
   6   3   3    1.28    1.39
   6   3   3    2.06    1.71
   6   3   3    0.76    0.94
   6   3   3   -0.82    1.12
  -7  -3  -3   34.80    2.39
  -7  -3  -3   41.46    2.80
  -7  -3  -3   34.02    2.16
  -7  -3  -3   34.69    2.11
  -7  -3  -3   35.08    2.55
   7   3   3   32.14    2.42
   7   3   3   33.95    2.12
   7   3   3   35.31    2.65
   7   3   3   34.54    3.25
   7   3   3   34.67    2.94
  -8  -3  -3    1.91    1.40
  -8  -3  -3    1.66    1.23
  -8  -3  -3    3.95    1.50
  -8  -3  -3    1.96    1.69
  -8  -3  -3    2.43    1.57
   8   3   3    3.53    2.16
   8   3   3    3.46    1.92
   8   3   3    0.12    1.45
   8   3   3    2.14    1.59
   8   3   3    2.10    1.25
  -9  -3  -3   -1.27    1.40
  -9  -3  -3    2.20    1.73
  -9  -3  -3    0.19    1.60
  -9  -3  -3    0.11    1.73
   9   3   3    4.02    2.04
   9   3   3    1.53    1.66
   9   3   3    0.74    2.14
   9   3   3    0.68    1.73
 -10  -3  -3    0.98    1.53
 -10  -3  -3   -1.74    1.84
 -10  -3  -3    0.34    1.61
 -10  -3  -3   -0.17    1.81
  10   3   3   -3.73    1.93
  10   3   3   -0.56    1.93
  10   3   3    1.30    1.67
  10   3   3    1.24    1.86
 -11  -3  -3    2.90    2.10
 -11  -3  -3    4.08    2.08
  11   3   3    3.44    2.19
  11   3   3    2.54    1.80
   9  -4  -3    0.17    1.92
   9  -4  -3    2.23    2.11
  -9   4   3    1.83    1.69
  -9   4   3    1.81    2.06
   8  -4  -3    2.98    1.61
   8  -4  -3    4.77    1.92
  -8   4   3    9.94    2.48
  -8   4   3    6.96    2.26
   7  -4  -3   -0.39    1.74
   7  -4  -3    0.90    1.54
  -7   4   3   -1.44    1.67
  -7   4   3    0.37    1.78
  -7   4   3    1.31    1.39
   6  -4  -3    2.81    1.67
   6  -4  -3    1.77    1.31
   6  -4  -3    5.26    1.63
  -6   4   3    3.20    1.39
  -6   4   3    3.42    1.44
  -6   4   3    4.57    1.63
   5  -4  -3    7.80    0.66
   5  -4  -3    7.45    1.74
   5  -4  -3    8.63    1.37
   5  -4  -3    8.34    1.59
  -5   4   3   10.14    1.78
  -5   4   3    8.67    1.70
  -5   4   3    9.33    1.72
   4  -4  -3   34.58    2.40
   4  -4  -3   32.79    0.96
   4  -4  -3   36.49    2.23
   4  -4  -3   34.49    0.95
   4  -4  -3   30.88    0.99
   4  -4  -3   36.60    1.78
  -4   4   3   30.59    2.10
  -4   4   3   35.36    2.29
  -4   4   3   31.22    0.96
  -4   4   3   38.54    2.58
   3  -4  -3    5.95    1.21
   3  -4  -3    4.97    0.58
   3  -4  -3    6.30    1.33
   3  -4  -3    4.37    0.50
   3  -4  -3    5.33    0.92
  -3   4   3    4.63    0.55
  -3   4   3    4.94    1.35
  -3   4   3    4.51    0.45
  -3   4   3    3.70    1.41
  -3   4   3    5.53    1.35
   2  -4  -3   36.63    1.53
   2  -4  -3   39.95    1.37
   2  -4  -3   35.63    2.09
   2  -4  -3   32.95    1.98
  -2   4   3   43.11    2.40
  -2   4   3   38.67    2.09
  -2   4   3   36.11    1.59
  -2   4   3   36.51    1.47
  -2   4   3   40.34    2.32
   1  -4  -3   55.67    2.23
   1  -4  -3   53.58    1.81
   1  -4  -3   53.49    2.24
   1  -4  -3   54.33    1.89
  -1   4   3   54.36    2.24
  -1   4   3   54.44    2.47
  -1   4   3   53.84    1.95
  -1   4   3   54.27    2.46
  -1   4   3   51.98    2.12
   0  -4  -3   -0.18    0.67
   0  -4  -3   -0.12    0.78
   0  -4  -3    0.78    0.77
   0  -4  -3    0.09    0.77
   0   4   3   -0.32    1.04
   0   4   3   -0.33    0.82
   0   4   3    0.85    0.95
   0   4   3    0.05    0.59
   0   4   3    0.11    1.02
  -1  -4  -3    0.38    0.90
  -1  -4  -3   -0.06    0.71
  -1  -4  -3    0.84    0.47
  -1  -4  -3    2.44    0.86
  -1  -4  -3    0.39    0.83
   1   4   3    0.51    1.08
   1   4   3    0.54    0.88
   1   4   3    0.44    1.13
   1   4   3    0.75    0.49
   1   4   3    1.93    1.35
  -2  -4  -3   42.09    1.73
  -2  -4  -3   39.91    2.23
  -2  -4  -3   38.46    1.89
  -2  -4  -3   38.12    1.85
   2   4   3   42.61    2.35
   2   4   3   37.78    1.70
   2   4   3   39.42    2.56
   2   4   3   40.84    2.23
  -3  -4  -3   52.79    2.08
  -3  -4  -3   53.58    2.36
  -3  -4  -3   52.56    2.27
  -3  -4  -3   51.14    2.69
  -3  -4  -3   49.67    3.06
   3   4   3   51.16    2.62
   3   4   3   55.39    2.55
   3   4   3   55.81    2.85
   3   4   3   48.60    3.07
   3   4   3   54.38    2.00
  -4  -4  -3    3.19    0.90
  -4  -4  -3    2.70    0.87
  -4  -4  -3    3.53    1.23
  -4  -4  -3    3.14    0.52
  -4  -4  -3    1.95    1.75
   4   4   3    1.84    1.44
   4   4   3    0.94    1.75
   4   4   3    2.85    0.97
   4   4   3    3.55    1.39
  -5  -4  -3   46.78    2.42
  -5  -4  -3   47.08    1.69
  -5  -4  -3   50.79    2.21
  -5  -4  -3   47.46    2.58
  -5  -4  -3   44.50    3.34
   5   4   3   45.40    3.32
   5   4   3   45.85    3.01
   5   4   3   45.48    1.99
   5   4   3   47.94    2.56
  -6  -4  -3    5.83    1.59
  -6  -4  -3    5.78    1.96
  -6  -4  -3    4.18    0.98
  -6  -4  -3    5.19    1.19
  -6  -4  -3    3.35    1.28
   6   4   3    5.39    1.56
   6   4   3    4.44    1.74
   6   4   3    8.62    1.65
   6   4   3    5.22    1.21
  -7  -4  -3    0.83    1.33
  -7  -4  -3    2.02    1.16
  -7  -4  -3    3.00    2.30
  -7  -4  -3    2.62    1.04
  -7  -4  -3    2.59    1.58
   7   4   3    2.87    1.43
   7   4   3    2.40    1.73
   7   4   3    3.51    2.06
   7   4   3    3.98    1.27
  -8  -4  -3    1.59    1.32
  -8  -4  -3    3.13    1.26
  -8  -4  -3    1.28    1.45
  -8  -4  -3    0.06    1.66
  -8  -4  -3    0.81    2.47
   8   4   3    5.16    2.68
   8   4   3    2.86    1.65
   8   4   3    0.85    1.86
   8   4   3    2.02    1.32
   8   4   3    3.05    1.80
  -9  -4  -3   24.70    2.95
  -9  -4  -3   33.50    3.03
  -9  -4  -3   28.90    2.34
  -9  -4  -3   30.65    2.92
   9   4   3   36.53    3.65
   9   4   3   29.91    2.72
   9   4   3   29.03    3.03
   9   4   3   31.97    3.78
 -10  -4  -3   -0.72    1.68
 -10  -4  -3   -0.95    1.81
 -10  -4  -3    0.92    2.02
  10   4   3    3.25    1.81
  10   4   3    4.76    2.74
  10   4   3    2.25    1.95
  10   4   3   -0.03    2.05
 -11  -4  -3   -0.55    2.17
 -11  -4  -3    2.42    2.07
 -11  -4  -3   -4.00    1.87
  11   4   3    0.27    1.91
  11   4   3    1.40    1.90
  11   4   3    6.75    2.46
   9  -5  -3    3.55    2.21
   9  -5  -3    6.10    2.39
  -9   5   3    8.15    2.63
  -9   5   3    7.38    2.48
   8  -5  -3   -0.40    1.81
   8  -5  -3    3.23    1.95
  -8   5   3    2.19    2.08
  -8   5   3    0.31    1.82
   7  -5  -3    5.54    2.15
   7  -5  -3    2.71    1.83
  -7   5   3    6.67    2.12
  -7   5   3    5.21    2.23
   6  -5  -3    4.85    1.73
   6  -5  -3    2.19    1.73
  -6   5   3    6.53    2.16
  -6   5   3    6.15    1.72
  -6   5   3    4.69    1.93
   5  -5  -3    6.57    1.79
   5  -5  -3    8.33    1.44
   5  -5  -3    5.79    1.65
  -5   5   3    7.25    1.71
  -5   5   3    6.91    2.02
  -5   5   3    6.04    1.87
   4  -5  -3   -1.08    0.88
   4  -5  -3    0.95    1.19
   4  -5  -3    0.22    1.27
  -4   5   3   -1.02    1.25
  -4   5   3   -0.29    1.09
  -4   5   3   -0.12    1.11
   3  -5  -3   36.01    2.31
   3  -5  -3   34.37    1.72
   3  -5  -3   30.21    2.20
  -3   5   3   31.93    2.43
  -3   5   3   30.00    2.21
  -3   5   3   35.69    2.43
   2  -5  -3   96.65    3.40
   2  -5  -3   93.20    3.33
   2  -5  -3   95.67    2.84
   2  -5  -3   93.34    2.36
  -2   5   3   94.90    3.53
  -2   5   3   91.26    2.44
  -2   5   3   88.68    2.33
  -2   5   3   89.54    2.59
  -2   5   3   92.84    3.32
  -2   5   3   90.85    3.49
   1  -5  -3    0.68    0.95
   1  -5  -3    0.76    0.78
   1  -5  -3    0.56    0.71
   1  -5  -3    1.18    1.01
  -1   5   3    0.01    0.81
  -1   5   3   -0.82    1.23
  -1   5   3   -0.63    0.85
  -1   5   3    0.56    0.68
  -1   5   3    0.60    1.01
  -1   5   3    0.83    1.35
   0  -5  -3   97.55    3.16
   0  -5  -3  104.90    3.32
   0  -5  -3   99.64    3.13
   0  -5  -3   99.79    3.05
   0   5   3   98.80    3.16
   0   5   3  100.79    3.48
   0   5   3   95.77    3.35
   0   5   3   99.48    3.62
   0   5   3   98.98    2.89
   0   5   3  103.81    3.24
  -1  -5  -3    5.56    1.08
  -1  -5  -3    7.39    1.21
  -1  -5  -3    8.09    1.29
  -1  -5  -3    6.66    1.03
   1   5   3    8.67    1.45
   1   5   3    5.50    1.08
   1   5   3    8.56    0.85
   1   5   3    9.85    1.72
   1   5   3    6.76    1.30
   1   5   3    8.30    1.64
  -2  -5  -3   14.33    0.58
  -2  -5  -3   15.09    0.64
  -2  -5  -3   15.94    1.41
  -2  -5  -3   17.12    2.23
  -2  -5  -3   18.40    1.66
  -2  -5  -3   14.44    1.30
  -2  -5  -3   13.97    1.74
   2   5   3   16.24    1.88
   2   5   3   17.12    1.69
   2   5   3   16.63    1.81
   2   5   3   14.28    0.61
   2   5   3   13.33    1.68
   2   5   3   14.57    2.16
  -3  -5  -3    5.79    1.26
  -3  -5  -3    5.93    1.16
  -3  -5  -3    4.70    1.85
  -3  -5  -3    5.84    1.00
   3   5   3    4.68    1.91
   3   5   3    7.60    1.39
   3   5   3    5.52    1.35
   3   5   3    3.08    1.52
  -4  -5  -3   15.97    1.62
  -4  -5  -3   18.81    1.90
  -4  -5  -3   15.76    1.27
  -4  -5  -3   16.93    2.63
   4   5   3   15.48    2.58
   4   5   3   18.53    2.10
   4   5   3   18.26    1.70
   4   5   3   17.45    2.24
  -5  -5  -3   25.74    2.11
  -5  -5  -3   24.11    1.93
  -5  -5  -3   23.88    1.58
  -5  -5  -3   29.34    3.01
   5   5   3   25.50    2.60
   5   5   3   27.13    2.86
   5   5   3   27.72    1.04
   5   5   3   26.57    1.83
   5   5   3   26.72    2.31
  -6  -5  -3    2.42    1.01
  -6  -5  -3    2.74    0.75
  -6  -5  -3    1.30    2.10
  -6  -5  -3    1.40    1.21
  -6  -5  -3    1.58    1.38
   6   5   3    4.23    0.74
   6   5   3    1.58    1.18
   6   5   3    1.20    1.72
   6   5   3    4.57    2.15
   6   5   3    0.95    1.51
  -7  -5  -3   12.75    1.96
  -7  -5  -3   13.80    3.12
  -7  -5  -3   11.05    1.29
  -7  -5  -3   13.01    1.67
  -7  -5  -3   11.98    2.13
   7   5   3   12.61    1.31
   7   5   3   13.31    2.18
   7   5   3   10.15    1.67
   7   5   3   14.71    2.93
   7   5   3   11.45    2.38
  -8  -5  -3   24.80    2.16
  -8  -5  -3   33.45    4.44
  -8  -5  -3   29.63    2.71
  -8  -5  -3   22.53    2.74
   8   5   3   28.84    2.95
   8   5   3   26.37    3.88
   8   5   3   23.99    2.22
   8   5   3   25.90    3.26
  -9  -5  -3   10.74    3.60
  -9  -5  -3   10.45    2.03
  -9  -5  -3    5.33    1.84
  -9  -5  -3    9.68    2.37
   9   5   3   10.27    3.06
   9   5   3   12.22    2.34
   9   5   3   10.20    2.71
   9   5   3    9.26    2.22
 -10  -5  -3    2.01    2.10
 -10  -5  -3    5.82    1.79
 -10  -5  -3    0.48    1.83
  10   5   3    2.83    2.65
  10   5   3    2.03    1.77
  10   5   3    7.32    2.91
  10   5   3    1.68    2.08
 -11  -5  -3    1.27    2.11
 -11  -5  -3    0.86    1.77
 -11  -5  -3   -0.41    2.11
  11   5   3    3.17    2.58
  11   5   3    3.32    1.87
   8  -6  -3    0.50    1.91
   8  -6  -3    0.48    2.00
  -8   6   3    2.47    2.13
  -8   6   3    0.90    2.07
   7  -6  -3   12.23    2.37
   7  -6  -3   14.49    2.41
  -7   6   3   18.90    3.13
  -7   6   3   14.15    2.70
   6  -6  -3   -0.70    1.52
   6  -6  -3   -0.25    1.59
  -6   6   3    2.85    1.44
  -6   6   3    0.43    2.01
  -6   6   3    3.63    1.91
   5  -6  -3    1.79    1.69
   5  -6  -3    5.86    1.47
   5  -6  -3    4.24    1.73
  -5   6   3    5.52    1.90
  -5   6   3    6.69    2.19
  -5   6   3    5.46    1.63
   4  -6  -3    1.99    1.53
   4  -6  -3    1.45    1.06
   4  -6  -3   -1.13    1.30
  -4   6   3    0.32    1.41
  -4   6   3    0.39    1.61
  -4   6   3   -0.15    1.41
   3  -6  -3    1.19    1.30
   3  -6  -3    2.79    1.07
   3  -6  -3    3.67    1.37
  -3   6   3    2.44    1.36
  -3   6   3    4.76    1.75
  -3   6   3    1.99    1.45
   2  -6  -3    2.14    0.99
   2  -6  -3    3.72    1.08
   2  -6  -3   -0.63    0.99
  -2   6   3    1.67    0.46
  -2   6   3   -0.16    0.83
  -2   6   3   -0.17    1.10
  -2   6   3    0.75    0.69
  -2   6   3    0.77    1.39
  -2   6   3    1.47    1.43
   1  -6  -3   -0.08    0.76
   1  -6  -3    0.29    1.09
   1  -6  -3    0.86    1.07
  -1   6   3   -0.78    0.79
  -1   6   3   -0.01    0.65
  -1   6   3   -0.84    1.30
  -1   6   3    1.17    1.02
  -1   6   3    1.23    1.42
  -1   6   3   -0.31    1.04
   0  -6  -3   40.51    2.01
   0  -6  -3   38.88    2.05
   0  -6  -3   42.58    2.10
   0  -6  -3   39.22    2.12
   0   6   3   41.91    2.32
   0   6   3   40.99    1.95
   0   6   3   39.86    2.34
   0   6   3   38.66    2.04
   0   6   3   44.30    2.19
   0   6   3   42.49    2.62
  -1  -6  -3   25.26    1.78
  -1  -6  -3   26.91    1.94
  -1  -6  -3   26.91    1.64
  -1  -6  -3   26.29    2.16
  -1  -6  -3   27.55    1.93
   1   6   3   29.55    2.16
   1   6   3   29.21    2.15
   1   6   3   27.68    2.36
   1   6   3   26.85    2.30
   1   6   3   28.04    1.35
  -2  -6  -3   26.92    1.95
  -2  -6  -3   27.13    2.19
  -2  -6  -3   25.67    2.39
  -2  -6  -3   25.55    1.63
  -2  -6  -3   27.04    1.88
   2   6   3   27.84    2.64
   2   6   3   26.04    2.47
   2   6   3   25.17    2.00
   2   6   3   25.13    2.16
   2   6   3   28.89    2.41
   2   6   3   25.55    1.04
  -3  -6  -3    8.79    1.48
  -3  -6  -3    9.29    1.12
  -3  -6  -3    9.64    1.44
  -3  -6  -3   10.37    2.19
   3   6   3    8.21    2.10
   3   6   3    6.75    1.67
   3   6   3    7.11    1.73
   3   6   3    9.09    1.54
  -4  -6  -3   41.15    2.37
  -4  -6  -3   41.16    1.91
  -4  -6  -3   49.34    2.56
  -4  -6  -3   44.95    3.38
   4   6   3   43.29    2.55
   4   6   3   47.00    3.11
   4   6   3   45.87    2.45
   4   6   3   42.42    3.29
  -5  -6  -3    2.70    0.90
  -5  -6  -3    2.83    2.00
  -5  -6  -3    1.47    1.19
  -5  -6  -3    1.97    1.26
   5   6   3    0.53    1.80
   5   6   3    0.47    1.49
   5   6   3    3.50    1.74
   5   6   3    2.02    1.25
  -6  -6  -3   38.66    2.58
  -6  -6  -3   35.88    2.66
  -6  -6  -3   41.08    3.79
  -6  -6  -3   37.28    2.05
   6   6   3   38.24    2.96
   6   6   3   39.65    3.64
   6   6   3   41.25    2.53
   6   6   3   35.07    3.26
  -7  -6  -3    0.72    1.23
  -7  -6  -3    1.24    1.91
  -7  -6  -3    1.94    1.10
  -7  -6  -3    0.17    1.37
   7   6   3    1.13    1.82
   7   6   3    0.51    1.50
   7   6   3    3.78    2.35
   7   6   3    2.91    1.86
  -8  -6  -3    6.69    3.14
  -8  -6  -3    6.91    1.43
  -8  -6  -3    6.58    2.06
  -8  -6  -3    9.17    2.01
   8   6   3    8.13    2.86
   8   6   3    7.97    2.26
   8   6   3    7.16    1.91
   8   6   3    7.08    2.43
  -9  -6  -3   16.85    2.72
  -9  -6  -3   22.81    4.40
  -9  -6  -3   18.33    2.51
  -9  -6  -3   19.65    2.23
   9   6   3   17.73    3.67
   9   6   3   17.55    3.16
   9   6   3   21.30    2.99
 -10  -6  -3    0.60    1.82
 -10  -6  -3    3.37    2.16
 -10  -6  -3    4.43    3.65
  10   6   3    8.50    3.09
  10   6   3    2.24    2.11
  10   6   3    6.92    2.01
 -11  -6  -3   -2.18    1.96
 -11  -6  -3    1.36    1.87
  11   6   3    4.56    2.48
  11   6   3    4.95    2.02
  11   6   3    5.44    2.89
   7  -7  -3   -1.08    1.73
   7  -7  -3   -0.01    1.84
  -7   7   3   -1.56    1.41
  -7   7   3   -0.05    1.98
   6  -7  -3   -1.05    1.66
   6  -7  -3    1.95    1.87
  -6   7   3    2.42    1.95
  -6   7   3    3.02    1.71
   5  -7  -3    1.84    1.68
   5  -7  -3    1.89    1.43
  -5   7   3    4.22    1.62
  -5   7   3    1.95    2.01
  -5   7   3    0.70    1.73
   4  -7  -3    1.20    1.60
   4  -7  -3    3.14    1.31
   4  -7  -3    0.68    1.54
  -4   7   3   -0.65    1.52
  -4   7   3   -0.12    1.51
  -4   7   3    1.50    2.01
   3  -7  -3    5.26    1.32
   3  -7  -3    2.12    1.46
   3  -7  -3    3.10    1.55
  -3   7   3    3.04    1.87
  -3   7   3    4.13    1.87
  -3   7   3    2.98    1.50
   2  -7  -3    0.84    1.20
   2  -7  -3    3.01    1.18
   2  -7  -3    1.62    1.32
  -2   7   3   -0.25    1.17
  -2   7   3    4.14    1.35
  -2   7   3    2.04    1.35
  -2   7   3    2.61    1.67
   1  -7  -3   18.89    1.84
   1  -7  -3   16.66    1.81
   1  -7  -3   12.33    1.75
  -1   7   3   16.19    2.10
  -1   7   3   14.20    1.46
  -1   7   3   18.85    1.93
  -1   7   3   15.80    2.30
  -1   7   3   16.53    1.29
  -1   7   3   14.87    1.67
   0  -7  -3   28.01    2.19
   0  -7  -3   25.42    1.96
   0  -7  -3   26.36    2.03
   0   7   3   27.59    2.53
   0   7   3   25.64    2.38
   0   7   3   28.12    2.15
   0   7   3   28.54    1.96
   0   7   3   28.60    1.72
   0   7   3   22.28    1.10
  -1  -7  -3   29.81    2.03
  -1  -7  -3   28.96    1.88
  -1  -7  -3   35.15    2.65
  -1  -7  -3   29.81    2.19
   1   7   3   28.44    2.59
   1   7   3   29.35    1.61
   1   7   3   28.20    2.09
   1   7   3   31.76    2.55
   1   7   3   29.48    2.08
   1   7   3   32.94    2.33
  -2  -7  -3    1.47    1.15
  -2  -7  -3    0.16    1.45
  -2  -7  -3   -0.40    0.85
  -2  -7  -3    0.56    1.09
   2   7   3   -0.14    1.52
   2   7   3    1.08    1.44
   2   7   3   -0.35    0.53
   2   7   3    0.61    1.34
   2   7   3   -0.58    1.19
  -3  -7  -3    0.56    0.88
  -3  -7  -3    1.10    0.29
  -3  -7  -3    1.30    1.94
  -3  -7  -3    1.39    1.17
  -3  -7  -3    1.16    1.17
   3   7   3    2.22    1.51
   3   7   3   -0.02    1.53
   3   7   3    1.55    1.70
   3   7   3    1.49    1.36
   3   7   3    1.73    0.29
  -4  -7  -3   23.72    3.24
  -4  -7  -3   23.13    2.32
  -4  -7  -3   21.54    1.56
  -4  -7  -3   22.05    2.10
   4   7   3   21.58    2.68
   4   7   3   22.55    3.21
   4   7   3   19.89    2.53
   4   7   3   22.27    2.30
  -5  -7  -3   -0.18    1.91
  -5  -7  -3   -0.20    0.97
  -5  -7  -3    0.74    1.26
  -5  -7  -3   -1.10    0.76
   5   7   3    0.89    1.75
   5   7   3   -1.49    1.87
   5   7   3    0.12    1.36
   5   7   3   -0.13    1.20
  -6  -7  -3    1.09    1.52
  -6  -7  -3   -1.00    2.05
  -6  -7  -3    0.70    0.86
  -6  -7  -3    2.89    1.40
   6   7   3   -2.35    1.27
   6   7   3   -0.40    1.67
   6   7   3    0.44    2.13
   6   7   3    1.59    1.98
  -7  -7  -3   11.92    2.31
  -7  -7  -3   16.72    1.67
  -7  -7  -3   13.80    2.15
  -7  -7  -3   12.40    3.33
   7   7   3   11.51    2.49
   7   7   3   13.58    2.78
   7   7   3   13.89    3.22
   7   7   3   15.15    2.37
  -8  -7  -3    5.79    1.85
  -8  -7  -3    8.53    3.40
  -8  -7  -3    4.59    2.03
   8   7   3    6.42    1.90
   8   7   3    8.63    3.15
   8   7   3    6.60    2.42
   8   7   3   10.21    2.69
  -9  -7  -3    1.32    3.20
  -9  -7  -3    4.50    1.93
  -9  -7  -3    3.31    2.13
   9   7   3    0.25    2.12
   9   7   3    4.06    2.71
 -10  -7  -3    5.03    2.32
 -10  -7  -3   13.00    2.47
 -10  -7  -3    6.96    3.90
  10   7   3    4.01    2.38
  10   7   3   10.62    3.23
   6  -8  -3    0.91    1.87
   6  -8  -3    0.52    1.49
  -6   8   3    1.50    2.13
  -6   8   3    0.19    1.93
   5  -8  -3    4.62    1.92
   5  -8  -3    5.14    2.00
  -5   8   3    5.38    2.13
  -5   8   3    7.46    2.51
   4  -8  -3    0.11    1.61
   4  -8  -3    0.96    1.24
   4  -8  -3   -0.93    1.55
  -4   8   3    3.74    2.03
  -4   8   3    4.02    2.26
  -4   8   3    0.58    1.51
   3  -8  -3    0.43    1.23
   3  -8  -3    0.78    1.52
   3  -8  -3    4.06    1.67
  -3   8   3    1.34    2.09
  -3   8   3   -0.65    1.38
  -3   8   3    3.25    1.69
   2  -8  -3    0.18    1.28
   2  -8  -3    0.91    1.14
   2  -8  -3   -1.07    1.41
  -2   8   3    0.37    1.84
  -2   8   3    1.98    1.46
  -2   8   3   -1.57    1.75
   1  -8  -3    1.23    1.28
   1  -8  -3   -1.32    1.22
   1  -8  -3   -0.94    1.29
  -1   8   3   -1.13    1.66
  -1   8   3    0.69    1.84
  -1   8   3   -0.57    1.10
  -1   8   3    1.95    1.22
   0  -8  -3    0.71    1.32
   0  -8  -3    3.09    1.24
   0  -8  -3    2.02    1.30
   0   8   3    2.39    0.94
   0   8   3    0.93    1.87
   0   8   3   -0.79    1.11
   0   8   3    0.73    1.07
   0   8   3    2.82    1.49
   0   8   3   -0.95    1.57
  -1  -8  -3   25.48    2.09
  -1  -8  -3   22.32    1.78
  -1  -8  -3   24.01    2.58
  -1  -8  -3   26.30    2.38
   1   8   3   25.02    2.69
   1   8   3   26.76    2.57
   1   8   3   29.33    3.01
   1   8   3   24.88    1.64
   1   8   3   24.42    2.30
  -2  -8  -3    5.03    1.96
  -2  -8  -3    2.82    1.35
  -2  -8  -3    5.86    1.52
  -2  -8  -3    4.11    1.17
   2   8   3    4.50    1.73
   2   8   3    6.09    1.93
   2   8   3    5.27    0.90
   2   8   3    3.23    1.74
   2   8   3    2.57    1.46
  -3  -8  -3   28.00    2.33
  -3  -8  -3   27.04    3.49
  -3  -8  -3   21.85    1.76
  -3  -8  -3   22.78    2.35
   3   8   3   24.07    2.63
   3   8   3   24.94    2.65
   3   8   3   24.38    2.89
   3   8   3   25.72    3.26
  -4  -8  -3    2.27    0.93
  -4  -8  -3    0.41    2.07
  -4  -8  -3    2.76    1.41
  -4  -8  -3    3.50    1.50
   4   8   3    4.99    2.04
   4   8   3    1.76    1.77
   4   8   3    1.93    1.88
   4   8   3    3.26    2.25
  -5  -8  -3    0.63    1.33
  -5  -8  -3   -0.86    2.03
  -5  -8  -3    0.90    0.94
  -5  -8  -3   -0.08    1.30
   5   8   3   -0.50    1.83
   5   8   3   -2.62    2.14
   5   8   3    0.31    1.82
   5   8   3   -0.62    1.71
  -6  -8  -3    1.53    1.58
  -6  -8  -3    1.25    2.48
  -6  -8  -3   -0.85    1.36
   6   8   3    1.11    1.66
   6   8   3   -1.68    2.01
   6   8   3    2.64    1.62
   6   8   3   -0.17    2.41
  -7  -8  -3    0.41    2.55
  -7  -8  -3    0.55    1.57
  -7  -8  -3    0.37    1.72
   7   8   3    3.37    2.65
   7   8   3    0.06    2.05
   7   8   3   -1.49    2.02
   7   8   3    2.81    1.88
  -8  -8  -3    2.29    1.73
  -8  -8  -3    3.49    1.94
  -8  -8  -3   -2.74    2.48
   8   8   3   -0.30    1.99
   8   8   3    0.55    2.09
   8   8   3    0.55    1.73
   8   8   3   -1.45    2.07
  -9  -8  -3   -0.07    1.86
  -9  -8  -3    0.90    1.82
  -9  -8  -3    0.56    2.51
   9   8   3    5.75    2.81
   9   8   3    3.14    2.39
 -10  -8  -3    1.40    1.86
 -10  -8  -3   -0.02    2.01
 -10  -8  -3    0.30    3.50
  10   8   3   -1.38    2.16
  10   8   3    7.19    3.16
   5  -9  -3    0.28    1.86
   5  -9  -3    0.94    1.72
  -5   9   3   -1.56    1.72
  -5   9   3    2.04    2.25
   4  -9  -3    0.62    1.73
   4  -9  -3    3.05    1.85
  -4   9   3    1.67    1.69
  -4   9   3    2.51    1.83
   3  -9  -3   -0.15    1.63
   3  -9  -3   -1.41    1.42
   3  -9  -3    1.39    1.39
  -3   9   3   -0.15    1.76
  -3   9   3   -0.65    1.97
  -3   9   3    1.08    2.18
   2  -9  -3    1.79    1.30
   2  -9  -3   -0.28    1.53
   2  -9  -3    1.83    1.68
  -2   9   3    0.16    1.39
  -2   9   3    1.49    2.12
  -2   9   3    1.68    2.09
   1  -9  -3    4.24    1.51
   1  -9  -3    2.95    1.40
   1  -9  -3    3.05    1.41
  -1   9   3    3.28    1.55
  -1   9   3    3.15    2.16
  -1   9   3    2.10    2.30
   0  -9  -3   13.69    1.99
   0  -9  -3    9.25    1.71
   0  -9  -3   14.75    2.21
   0   9   3   13.83    2.88
   0   9   3   13.51    3.16
   0   9   3   12.16    1.79
   0   9   3   13.53    2.59
   0   9   3   13.98    2.73
  -1  -9  -3    3.95    1.37
  -1  -9  -3    6.17    1.64
  -1  -9  -3    4.10    1.64
   1   9   3    5.06    2.38
   1   9   3    4.07    1.67
   1   9   3    3.64    1.78
   1   9   3    4.21    1.16
   1   9   3    5.34    2.08
  -2  -9  -3    1.91    2.06
  -2  -9  -3    1.32    1.45
  -2  -9  -3    0.82    1.36
  -2  -9  -3   -1.14    1.09
   2   9   3    2.87    1.96
   2   9   3   -3.39    1.34
   2   9   3   -1.05    1.76
   2   9   3    2.43    2.27
  -3  -9  -3   12.61    2.07
  -3  -9  -3   10.50    1.95
  -3  -9  -3   12.50    2.06
  -3  -9  -3   10.31    2.69
   3   9   3   11.78    2.35
   3   9   3   12.06    2.30
   3   9   3   14.53    2.88
   3   9   3   11.02    2.60
  -4  -9  -3    0.57    1.53
  -4  -9  -3   -2.15    1.31
  -4  -9  -3    0.28    2.15
   4   9   3   -0.95    1.73
   4   9   3   -0.61    2.06
   4   9   3    1.82    1.93
   4   9   3   -0.05    1.58
  -5  -9  -3   -1.22    1.41
  -5  -9  -3    1.59    1.62
  -5  -9  -3    0.03    2.43
   5   9   3   -1.08    2.04
   5   9   3    4.30    2.65
   5   9   3   -1.63    1.93
   5   9   3    0.09    2.02
  -6  -9  -3   -3.45    1.40
  -6  -9  -3    1.00    2.66
  -6  -9  -3    1.89    1.75
   6   9   3   -1.06    2.01
   6   9   3    0.16    2.15
   6   9   3   -1.08    2.01
   6   9   3    1.17    2.67
  -7  -9  -3    1.16    2.75
  -7  -9  -3   -1.83    1.57
  -7  -9  -3    1.18    1.63
   7   9   3   -1.40    2.18
   7   9   3   -4.22    1.93
   7   9   3    2.21    2.84
   7   9   3   -1.69    1.99
  -8  -9  -3    0.71    1.72
  -8  -9  -3    0.98    1.83
  -8  -9  -3    0.10    2.81
   8   9   3    4.72    2.53
   8   9   3    2.03    2.81
   8   9   3   -2.45    2.16
  -9  -9  -3    2.90    1.92
  -9  -9  -3   -3.44    3.05
  -9  -9  -3    0.80    1.93
   9   9   3    4.61    2.90
   9   9   3   -2.46    2.15
 -10  -9  -3    3.46    2.19
 -10  -9  -3    2.75    3.78
 -10  -9  -3    6.46    2.33
  10   9   3    1.27    2.19
  10   9   3   -2.30    2.46
   4 -10  -3   -0.88    1.88
   4 -10  -3    0.25    1.96
  -4  10   3    3.19    2.40
  -4  10   3    5.00    2.07
   3 -10  -3    2.10    1.80
   3 -10  -3   -2.31    1.52
   3 -10  -3   -3.01    1.65
  -3  10   3    0.29    2.10
  -3  10   3    1.18    1.64
  -3  10   3    1.56    2.41
   2 -10  -3    2.98    1.91
   2 -10  -3    5.25    1.75
   2 -10  -3    6.67    1.89
  -2  10   3    6.35    1.90
  -2  10   3    4.67    2.52
  -2  10   3    3.00    2.26
   1 -10  -3    1.98    1.46
   1 -10  -3   -2.04    1.64
   1 -10  -3   -0.01    1.44
  -1  10   3   -1.82    2.31
  -1  10   3   -2.38    1.86
  -1  10   3   -1.14    1.29
   0 -10  -3    0.18    1.69
   0 -10  -3   -0.91    1.43
   0 -10  -3    3.10    1.64
   0  10   3   -0.36    2.37
   0  10   3    0.38    1.31
   0  10   3   -1.37    1.48
  -1 -10  -3   -0.37    1.31
  -1 -10  -3   -0.58    1.60
  -1 -10  -3    1.30    1.55
   1  10   3   -2.20    2.32
   1  10   3    2.67    1.92
   1  10   3    0.43    2.01
  -2 -10  -3   30.40    2.99
  -2 -10  -3   30.19    3.00
  -2 -10  -3   30.87    3.61
   2  10   3   33.09    3.46
   2  10   3   36.32    3.62
   2  10   3   28.20    3.07
   2  10   3   34.03    3.90
  -3 -10  -3    1.64    1.68
  -3 -10  -3    2.99    1.73
  -3 -10  -3    5.92    2.55
   3  10   3    6.80    2.33
   3  10   3    2.41    1.92
   3  10   3    5.92    2.72
   3  10   3    6.48    2.49
  -4 -10  -3    2.93    1.79
  -4 -10  -3   -3.13    2.16
  -4 -10  -3    1.33    1.59
   4  10   3    1.06    2.44
   4  10   3    3.69    2.65
   4  10   3    1.73    2.12
   4  10   3   -1.69    1.83
  -5 -10  -3    8.45    2.14
  -5 -10  -3   13.52    2.40
  -5 -10  -3    7.36    3.04
   5  10   3    8.49    2.84
   5  10   3    7.96    2.58
   5  10   3   16.96    3.55
   5  10   3    7.18    2.42
  -6 -10  -3    1.58    2.79
  -6 -10  -3    2.78    1.85
  -6 -10  -3    6.42    2.08
   6  10   3    4.83    2.47
   6  10   3   -1.33    2.24
   6  10   3    2.91    2.54
   6  10   3    5.86    3.01
  -7 -10  -3    1.88    2.97
  -7 -10  -3    5.50    1.98
  -7 -10  -3    2.57    1.95
   7  10   3    9.91    3.55
   7  10   3    3.20    2.54
   7  10   3    1.36    2.19
  -8 -10  -3   -1.16    2.33
  -8 -10  -3   -1.38    1.85
  -8 -10  -3    2.71    2.01
   8  10   3   -3.28    2.26
   8  10   3    8.33    3.38
   8  10   3    4.56    2.58
  -9 -10  -3    4.20    2.30
  -9 -10  -3    5.96    3.63
  -9 -10  -3    5.26    2.47
   9  10   3   12.73    4.05
   9  10   3   -0.74    2.47
   3 -11  -3   -1.40    1.69
   3 -11  -3    2.54    2.13
  -3  11   3    4.47    1.94
  -3  11   3    1.16    2.27
   2 -11  -3    0.10    1.62
   2 -11  -3    2.14    1.71
   2 -11  -3   -0.95    1.81
  -2  11   3   -1.34    1.95
  -2  11   3    4.06    1.98
  -2  11   3    0.10    2.80
   1 -11  -3    3.37    1.93
   1 -11  -3    4.94    1.87
   1 -11  -3    2.54    2.03
  -1  11   3    4.14    2.01
  -1  11   3    6.18    2.60
  -1  11   3    1.49    2.67
   0 -11  -3   -0.51    1.80
   0 -11  -3    3.82    1.68
   0  11   3    1.93    2.30
   0  11   3    0.83    2.66
  -1 -11  -3    5.03    2.04
  -1 -11  -3    0.95    1.85
   1  11   3    0.69    2.75
   1  11   3    3.13    2.32
  -2 -11  -3    1.26    1.72
  -2 -11  -3    2.36    1.92
  -2 -11  -3    1.19    2.33
   2  11   3    1.77    2.15
   2  11   3    1.89    1.93
   2  11   3    3.81    2.85
  -3 -11  -3    0.97    1.73
  -3 -11  -3    1.57    1.87
  -3 -11  -3    1.45    2.37
   3  11   3    3.70    2.29
   3  11   3    0.51    2.73
   3  11   3    2.06    1.91
   3  11   3   -0.79    2.08
  -4 -11  -3    9.13    3.16
  -4 -11  -3    7.66    2.25
  -4 -11  -3    7.17    2.16
   4  11   3   19.01    3.58
   4  11   3    7.41    3.05
   4  11   3    7.71    2.48
   4  11   3    8.98    2.63
  -5 -11  -3    4.81    3.09
  -5 -11  -3    5.59    2.15
  -5 -11  -3    5.43    2.11
   5  11   3    2.61    2.86
   5  11   3   15.27    3.65
   5  11   3    1.06    2.19
   5  11   3    3.02    2.60
  -6 -11  -3   -0.47    2.78
  -6 -11  -3   -2.00    1.57
  -6 -11  -3    3.22    2.00
   6  11   3    3.22    2.99
   6  11   3   -1.59    2.62
   6  11   3   -0.05    2.23
  -7 -11  -3   -2.53    2.75
  -7 -11  -3    3.12    2.02
  -7 -11  -3    2.83    2.06
   7  11   3    7.90    3.44
   7  11   3    0.30    2.38
   7  11   3    1.98    2.25
  -8 -11  -3    2.57    2.29
  -8 -11  -3   -0.45    1.90
  -8 -11  -3   -2.16    3.23
   8  11   3   11.39    3.96
   8  11   3   -1.71    2.52
   1 -12  -3   -1.04    2.10
   1 -12  -3    2.92    1.77
  -1  12   3   -0.10    2.28
  -1  12   3   -3.48    2.82
   0 -12  -3    4.11    1.83
   0 -12  -3    0.68    2.09
   0  12   3    0.84    2.34
   0  12   3   -7.35    2.69
  -1 -12  -3    0.26    1.66
  -1 -12  -3   -0.69    1.89
   1  12   3   -3.57    2.88
   1  12   3    0.87    2.21
  -2 -12  -3   -0.53    1.61
  -2 -12  -3    4.23    2.19
   2  12   3   -0.88    2.15
   2  12   3   -4.26    2.79
  -3 -12  -3   12.15    2.46
  -3 -12  -3    9.51    2.33
  -3 -12  -3    6.63    3.24
   3  12   3   10.58    3.55
   3  12   3   23.19    5.90
   3  12   3   12.54    2.95
  -4 -12  -3    4.03    2.06
  -4 -12  -3    0.90    1.92
  -4 -12  -3    6.30    3.06
   4  12   3    2.29    2.15
   4  12   3    3.98    2.56
   4  12   3    9.89    2.97
   4  12   3    4.16    3.35
  -5 -12  -3   -2.61    2.99
  -5 -12  -3   -0.32    2.02
  -5 -12  -3   -0.93    1.71
   5  12   3    2.02    2.51
   5  12   3    0.90    2.40
   5  12   3   11.50    3.49
  -6 -12  -3   -1.01    3.00
  -6 -12  -3    1.39    1.93
  -6 -12  -3    1.23    2.38
   6  12   3   -0.11    2.78
   6  12   3   -4.20    2.74
   6  12   3    7.21    3.37
  -7 -12  -3    1.80    3.60
   7  12   3   13.14    4.15
   3  11  -4    0.20    2.65
   3  11  -4   -1.70    2.51
  -3 -11   4    2.25    2.96
  -3 -11   4    2.16    2.10
   2  11  -4   -5.29    2.29
   2  11  -4   -3.43    3.54
  -2 -11   4    5.15    2.21
   6  10  -4   -4.22    2.58
   6  10  -4    0.34    2.76
  -6 -10   4   -0.29    2.08
  -6 -10   4    0.46    2.87
   5  10  -4   -1.02    2.63
   5  10  -4   -5.90    2.39
  -5 -10   4    2.72    2.19
  -5 -10   4    0.35    2.88
   4  10  -4   -1.63    1.82
   4  10  -4   -0.24    2.55
  -4 -10   4    1.24    2.03
  -4 -10   4    0.33    2.54
   3  10  -4    3.03    2.01
   3  10  -4    3.06    2.50
   3  10  -4   -3.04    2.40
  -3 -10   4    1.25    1.64
  -3 -10   4    2.02    2.42
  -3 -10   4    5.17    2.23
   2  10  -4    1.73    2.37
   2  10  -4   -1.31    2.44
   2  10  -4    6.39    2.07
  -2 -10   4    4.48    2.04
  -2 -10   4    4.16    2.12
  -2 -10   4    5.14    2.82
   1  10  -4    9.41    2.32
   1  10  -4    4.85    2.29
  -1 -10   4    3.60    1.94
  -1 -10   4    5.12    2.18
   0  10  -4    1.59    1.79
   0  10  -4    1.18    2.63
   0 -10   4    0.39    1.81
   0 -10   4    3.74    2.05
  -1  10  -4    6.80    2.93
  -1  10  -4    7.58    2.36
   1 -10   4    5.79    2.18
   1 -10   4    0.45    1.98
   8   9  -4   -2.58    2.60
   8   9  -4    3.98    2.91
  -8  -9   4    2.85    2.24
  -8  -9   4    1.99    3.03
   7   9  -4    8.62    3.07
   7   9  -4    6.12    2.91
  -7  -9   4    8.99    3.60
  -7  -9   4    6.54    2.34
   6   9  -4    0.46    2.51
   6   9  -4    6.79    2.88
  -6  -9   4    5.00    3.22
  -6  -9   4    8.16    2.37
   5   9  -4    1.26    2.63
   5   9  -4    1.58    2.40
  -5  -9   4    5.68    3.11
  -5  -9   4    3.83    2.17
   4   9  -4    0.62    2.35
   4   9  -4    2.38    1.96
   4   9  -4    1.84    1.93
  -4  -9   4    0.35    2.83
  -4  -9   4    1.90    1.63
  -4  -9   4    0.60    2.07
   3   9  -4    5.14    2.49
   3   9  -4    3.23    2.09
   3   9  -4    7.26    2.03
  -3  -9   4   -2.47    1.72
  -3  -9   4    6.13    2.99
  -3  -9   4    2.69    1.61
  -3  -9   4    7.15    2.40
   2   9  -4    4.95    2.56
   2   9  -4   10.57    2.07
   2   9  -4    7.45    2.78
  -2  -9   4    7.26    2.85
  -2  -9   4    8.04    2.19
  -2  -9   4    9.52    2.36
  -2  -9   4    9.04    2.00
   1   9  -4    5.84    2.73
   1   9  -4    4.86    2.35
   1   9  -4    6.27    2.13
  -1  -9   4    9.27    2.25
  -1  -9   4    4.54    1.89
  -1  -9   4    7.04    2.63
  -1  -9   4    4.24    1.87
   0   9  -4   13.00    3.12
   0   9  -4   15.78    2.67
   0  -9   4   14.62    2.27
   0  -9   4   10.13    2.32
  -1   9  -4    0.42    1.69
  -1   9  -4   -0.78    2.25
   1  -9   4    1.67    1.83
   1  -9   4    1.87    1.87
  -2   9  -4    3.16    2.45
  -2   9  -4    2.79    1.93
   2  -9   4    2.47    1.88
   2  -9   4    0.76    1.92
  -3   9  -4    7.81    2.83
  -3   9  -4    2.67    2.09
   3  -9   4    0.65    2.11
   3  -9   4    2.56    1.91
   9   8  -4    0.73    2.73
   9   8  -4    7.56    2.48
  -9  -8   4    5.65    2.33
  -9  -8   4    4.96    3.73
   8   8  -4   -3.16    2.33
   8   8  -4    1.17    1.86
  -8  -8   4    4.85    3.28
  -8  -8   4    3.51    2.06
   7   8  -4    7.57    2.85
   7   8  -4    8.16    2.89
  -7  -8   4    8.07    2.36
  -7  -8   4    8.78    3.55
   6   8  -4    2.97    2.34
   6   8  -4    3.36    2.74
   6   8  -4   -0.01    2.40
  -6  -8   4    3.02    1.98
  -6  -8   4    2.03    1.78
  -6  -8   4    0.53    2.71
   5   8  -4   -0.11    1.67
   5   8  -4    0.02    2.27
   5   8  -4   -0.24    2.24
  -5  -8   4    1.80    2.72
  -5  -8   4    0.95    1.87
  -5  -8   4    2.50    2.10
   4   8  -4   37.83    3.53
   4   8  -4   37.91    4.03
   4   8  -4   39.40    3.08
  -4  -8   4   45.88    4.47
  -4  -8   4   41.45    3.38
  -4  -8   4   44.10    3.75
  -4  -8   4   41.58    2.71
   3   8  -4   29.65    2.63
   3   8  -4   26.39    3.47
   3   8  -4   33.77    3.47
  -3  -8   4   28.56    4.05
  -3  -8   4   28.11    3.07
  -3  -8   4   24.75    2.42
  -3  -8   4   31.14    3.26
   2   8  -4    0.56    2.29
   2   8  -4    0.16    1.88
   2   8  -4    0.98    1.54
  -2  -8   4    0.16    1.94
  -2  -8   4    1.03    1.50
  -2  -8   4    1.52    1.62
  -2  -8   4    1.90    1.55
   1   8  -4    0.64    1.59
   1   8  -4   -0.21    2.26
   1   8  -4   -0.03    1.71
  -1  -8   4   -2.19    1.53
  -1  -8   4    1.90    1.89
  -1  -8   4    0.13    1.52
  -1  -8   4    3.02    1.57
   0   8  -4   21.42    2.76
   0   8  -4   23.44    2.71
   0   8  -4   20.52    3.30
   0  -8   4   15.32    2.45
   0  -8   4   19.32    2.47
   0  -8   4   21.25    2.44
   0  -8   4   21.55    3.06
  -1   8  -4    2.52    1.75
  -1   8  -4    4.83    2.49
   1  -8   4    3.73    1.69
   1  -8   4    3.25    1.92
  -2   8  -4   -2.26    1.27
  -2   8  -4    0.08    2.17
  -2   8  -4    2.60    2.09
   2  -8   4   -0.44    1.66
   2  -8   4   -0.08    1.69
   2  -8   4   -0.31    1.32
  -3   8  -4    1.34    2.27
  -3   8  -4   -2.81    1.19
  -3   8  -4    0.10    1.72
   3  -8   4   -3.25    1.64
   3  -8   4    1.68    1.44
   3  -8   4    3.49    1.99
  -4   8  -4    1.71    2.36
  -4   8  -4   -0.85    1.47
  -4   8  -4    1.65    1.65
   4  -8   4    2.21    1.63
   4  -8   4   -0.85    1.87
   4  -8   4    3.40    2.11
  -5   8  -4   -0.48    2.45
  -5   8  -4   -2.56    1.65
  -5   8  -4   -0.88    1.83
   5  -8   4    1.22    2.00
   5  -8   4   -0.81    2.11
   5  -8   4    5.16    2.11
   9   7  -4    0.38    2.42
   9   7  -4    6.36    2.61
  -9  -7   4    4.67    2.12
  -9  -7   4    5.42    2.85
  -9  -7   4    4.66    3.57
   8   7  -4    7.39    2.80
   8   7  -4    9.69    2.70
  -8  -7   4    8.40    3.58
  -8  -7   4   10.22    2.36
  -8  -7   4   12.51    3.13
   7   7  -4    3.75    2.41
   7   7  -4    9.36    2.79
   7   7  -4    6.72    3.17
  -7  -7   4    4.02    2.02
  -7  -7   4    9.03    3.42
  -7  -7   4    4.60    2.95
  -7  -7   4    5.62    2.51
   6   7  -4   -0.20    1.64
   6   7  -4    0.31    2.22
   6   7  -4   -2.68    1.70
  -6  -7   4    0.05    1.98
  -6  -7   4    0.44    1.98
  -6  -7   4   -0.09    2.58
  -6  -7   4    2.52    1.87
   5   7  -4    7.56    2.47
   5   7  -4    9.39    2.26
   5   7  -4    9.27    2.15
  -5  -7   4   11.84    2.64
  -5  -7   4   10.90    3.09
  -5  -7   4    9.25    2.24
  -5  -7   4    8.21    2.38
   4   7  -4    3.73    1.75
   4   7  -4    8.87    2.05
   4   7  -4    3.92    2.15
  -4  -7   4    7.18    2.15
  -4  -7   4    6.22    2.00
  -4  -7   4    5.32    1.34
  -4  -7   4    9.76    2.84
   3   7  -4    5.42    1.83
   3   7  -4    2.86    2.16
   3   7  -4    6.24    2.12
  -3  -7   4    4.19    1.36
  -3  -7   4    4.92    2.58
  -3  -7   4    6.01    1.84
  -3  -7   4    4.95    2.10
   2   7  -4    0.23    2.02
   2   7  -4   -1.20    1.53
   2   7  -4    1.39    1.51
  -2  -7   4    0.56    1.45
  -2  -7   4    1.58    1.98
  -2  -7   4    0.09    1.44
  -2  -7   4   -2.46    1.11
   1   7  -4    6.53    1.90
   1   7  -4    8.64    2.08
   1   7  -4    7.73    2.43
  -1  -7   4    7.39    1.95
  -1  -7   4    6.11    2.35
  -1  -7   4    4.55    1.42
  -1  -7   4    5.39    1.76
   0   7  -4    3.84    1.80
   0   7  -4    4.17    1.12
   0   7  -4    5.54    1.73
   0   7  -4    4.87    1.75
   0  -7   4    2.56    1.67
   0  -7   4    4.98    1.14
   0  -7   4    6.64    1.66
   0  -7   4    7.45    2.18
   0  -7   4    4.37    1.52
  -1   7  -4    2.95    1.71
  -1   7  -4    3.35    1.65
  -1   7  -4    1.84    2.18
  -1   7  -4    1.54    1.19
   1  -7   4    5.31    1.31
   1  -7   4    3.03    1.59
   1  -7   4    5.49    1.88
   1  -7   4    6.76    1.99
   1  -7   4    6.20    1.52
  -2   7  -4    1.41    1.41
  -2   7  -4    2.40    1.70
  -2   7  -4    3.36    2.22
   2  -7   4    2.26    1.36
   2  -7   4    0.88    1.80
   2  -7   4    2.85    1.63
  -3   7  -4    2.32    2.21
  -3   7  -4    3.74    1.99
  -3   7  -4   -0.32    1.54
   3  -7   4    4.16    1.94
   3  -7   4    2.51    1.86
   3  -7   4    2.69    1.61
  -4   7  -4    4.17    2.00
  -4   7  -4    6.25    1.82
  -4   7  -4    6.12    2.49
   4  -7   4    5.99    1.77
   4  -7   4    2.06    1.92
   4  -7   4    2.68    2.10
  -5   7  -4    4.91    2.16
  -5   7  -4    5.63    2.31
  -5   7  -4    3.18    2.25
   5  -7   4    3.30    2.08
   5  -7   4    5.85    2.12
   5  -7   4    2.05    2.41
  -6   7  -4    3.75    2.51
  -6   7  -4    3.43    2.25
  -6   7  -4    2.11    1.97
   6  -7   4    7.04    2.72
   6  -7   4    4.42    1.91
   6  -7   4    2.28    2.20
  10   6  -4    4.03    2.25
  10   6  -4    0.88    2.35
 -10  -6   4   -0.52    2.66
 -10  -6   4    2.58    3.60
 -10  -6   4    0.90    2.18
   9   6  -4    9.07    2.62
   9   6  -4    9.55    2.69
  -9  -6   4   11.21    3.03
  -9  -6   4   10.92    2.38
  -9  -6   4   11.31    4.02
   8   6  -4    0.13    1.80
   8   6  -4    3.67    2.27
   8   6  -4    0.69    2.00
  -8  -6   4   -0.78    2.68
  -8  -6   4    1.99    1.93
  -8  -6   4    1.76    2.32
   7   6  -4    1.49    2.03
   7   6  -4    4.49    2.38
   7   6  -4    1.35    1.76
   7   6  -4    2.93    2.27
  -7  -6   4    2.37    2.14
  -7  -6   4   -0.71    2.61
  -7  -6   4    4.52    1.85
  -7  -6   4    0.47    2.09
   6   6  -4    1.85    2.10
   6   6  -4   -0.67    1.44
   6   6  -4    1.00    1.99
  -6  -6   4   -1.02    2.39
  -6  -6   4    0.95    1.87
  -6  -6   4    0.49    1.55
  -6  -6   4    0.47    1.90
   5   6  -4   -1.56    1.73
   5   6  -4    0.48    1.63
   5   6  -4   -0.62    1.37
  -5  -6   4   -1.15    1.67
  -5  -6   4    0.34    1.37
  -5  -6   4   -2.32    1.39
  -5  -6   4   -0.74    2.03
  -5  -6   4    1.24    0.88
   4   6  -4    6.13    2.02
   4   6  -4    2.61    1.66
   4   6  -4    5.43    1.76
  -4  -6   4    4.23    1.91
  -4  -6   4    4.58    2.30
  -4  -6   4    2.92    1.77
  -4  -6   4    4.86    1.69
  -4  -6   4    5.34    1.10
   3   6  -4    2.32    1.89
   3   6  -4    4.58    1.80
   3   6  -4    2.47    1.43
  -3  -6   4    3.49    1.11
  -3  -6   4    3.33    1.53
  -3  -6   4    2.03    1.56
  -3  -6   4    1.38    1.64
  -3  -6   4    3.32    2.09
   2   6  -4   16.03    2.13
   2   6  -4   14.88    2.27
   2   6  -4   13.10    2.06
  -2  -6   4   12.25    2.55
  -2  -6   4   12.37    1.96
  -2  -6   4   13.22    1.48
  -2  -6   4   12.69    2.04
   1   6  -4    4.83    2.02
   1   6  -4    3.11    1.47
   1   6  -4    3.22    0.79
   1   6  -4    2.96    1.40
  -1  -6   4    4.51    0.78
  -1  -6   4    3.96    1.83
  -1  -6   4    4.33    1.59
  -1  -6   4    4.35    1.31
  -1  -6   4    3.46    1.43
   0   6  -4    2.52    1.47
   0   6  -4    2.31    0.92
   0   6  -4    1.01    1.95
   0   6  -4    2.68    1.42
   0  -6   4    3.62    1.68
   0  -6   4    4.64    0.94
   0  -6   4    2.35    1.24
   0  -6   4    0.66    1.39
   0  -6   4    2.77    1.25
  -1   6  -4   28.41    3.10
  -1   6  -4   28.86    2.51
  -1   6  -4   29.93    2.04
  -1   6  -4   26.75    2.13
   1  -6   4   27.79    2.24
   1  -6   4   31.98    2.62
   1  -6   4   25.15    2.51
   1  -6   4   26.22    2.75
  -2   6  -4   17.34    2.70
  -2   6  -4   21.18    2.13
  -2   6  -4   15.82    2.32
   2  -6   4   16.59    2.40
   2  -6   4   19.49    1.95
   2  -6   4   18.96    2.23
   2  -6   4   16.04    2.09
  -3   6  -4   -3.50    1.40
  -3   6  -4    1.16    1.37
  -3   6  -4    1.78    1.54
   3  -6   4    1.46    1.23
   3  -6   4   -0.97    1.64
   3  -6   4    1.78    1.60
  -4   6  -4    0.60    1.92
  -4   6  -4    1.25    1.75
  -4   6  -4    0.38    1.65
   4  -6   4   -0.21    1.70
   4  -6   4    5.20    1.75
   4  -6   4    1.18    1.98
  -5   6  -4    8.54    2.30
  -5   6  -4    9.59    2.50
  -5   6  -4    8.73    2.30
   5  -6   4    8.82    2.31
   5  -6   4   11.96    2.42
   5  -6   4    9.95    2.57
  -6   6  -4    0.73    1.86
  -6   6  -4    1.97    2.14
  -6   6  -4   -0.92    1.79
   6  -6   4   -1.22    2.10
   6  -6   4    1.21    1.64
   6  -6   4   -0.26    1.89
  -7   6  -4    7.72    2.38
  -7   6  -4    3.05    2.22
  -7   6  -4    1.08    2.02
   7  -6   4    2.99    2.28
   7  -6   4    3.09    2.38
   7  -6   4    2.95    1.93
  10   5  -4    3.49    1.80
  10   5  -4    3.63    2.47
 -10  -5   4   -1.44    1.80
 -10  -5   4    2.71    3.43
 -10  -5   4   -0.29    1.77
   9   5  -4    0.42    1.83
   9   5  -4    0.00    2.16
   9   5  -4    5.77    2.20
  -9  -5   4   -0.52    1.58
  -9  -5   4    1.50    2.98
  -9  -5   4    1.13    2.34
   8   5  -4    0.69    2.03
   8   5  -4    2.24    1.83
   8   5  -4    4.27    2.35
   8   5  -4    4.72    2.23
  -8  -5   4    4.60    3.12
  -8  -5   4    1.60    2.16
  -8  -5   4    6.77    2.50
  -8  -5   4    7.04    1.91
   7   5  -4    4.95    1.81
   7   5  -4    0.93    1.56
   7   5  -4   -1.93    1.70
   7   5  -4    1.22    1.46
  -7  -5   4    1.00    1.53
  -7  -5   4    5.22    1.78
  -7  -5   4    5.43    2.82
  -7  -5   4    2.84    2.06
   6   5  -4    0.63    1.54
   6   5  -4    0.62    1.37
   6   5  -4   -0.47    1.71
  -6  -5   4   -0.03    1.30
  -6  -5   4    0.67    1.86
  -6  -5   4    1.69    1.04
  -6  -5   4    0.61    2.28
  -6  -5   4    0.49    1.44
   5   5  -4    1.40    1.75
   5   5  -4   -1.26    1.53
   5   5  -4    0.25    1.30
  -5  -5   4    0.83    0.77
  -5  -5   4   -0.68    1.92
  -5  -5   4    2.56    1.81
  -5  -5   4    1.93    1.67
  -5  -5   4    1.37    1.52
   4   5  -4    0.64    1.55
   4   5  -4   -0.81    1.40
   4   5  -4   -1.89    1.54
  -4  -5   4    0.64    0.74
  -4  -5   4    1.68    1.52
  -4  -5   4    1.24    1.30
  -4  -5   4    1.70    1.60
  -4  -5   4   -2.33    1.52
   3   5  -4   14.68    2.11
   3   5  -4   13.28    1.83
   3   5  -4   10.19    2.04
  -3  -5   4   13.03    2.05
  -3  -5   4   12.64    2.05
  -3  -5   4   12.18    2.51
  -3  -5   4    9.67    1.74
  -3  -5   4    9.33    1.14
   2   5  -4   59.49    3.05
   2   5  -4   62.13    3.03
   2   5  -4   59.46    1.59
   2   5  -4   62.92    3.05
  -2  -5   4   63.97    3.35
  -2  -5   4   63.12    3.77
  -2  -5   4   67.69    3.12
  -2  -5   4   63.28    3.04
  -2  -5   4   63.84    2.49
   1   5  -4    4.25    1.75
   1   5  -4    2.82    0.68
   1   5  -4    4.54    1.33
   1   5  -4    5.10    1.47
  -1  -5   4    4.50    1.41
  -1  -5   4    3.76    1.09
  -1  -5   4    3.01    1.67
  -1  -5   4    1.21    1.36
   0   5  -4   19.12    1.47
   0   5  -4   22.11    2.18
   0   5  -4   17.62    1.62
   0   5  -4   22.63    2.57
   0  -5   4   18.17    2.15
   0  -5   4   21.94    2.10
   0  -5   4   21.53    1.76
   0  -5   4   18.13    2.13
  -1   5  -4   10.87    1.38
  -1   5  -4   10.91    1.76
  -1   5  -4   15.29    2.33
  -1   5  -4   11.24    1.50
  -1   5  -4   10.69    1.80
   1  -5   4   13.90    1.73
   1  -5   4   12.44    2.00
   1  -5   4   11.01    1.56
   1  -5   4   12.33    2.02
  -2   5  -4   -0.03    1.28
  -2   5  -4   -0.76    0.98
  -2   5  -4   -1.96    1.53
  -2   5  -4   -1.55    1.33
  -2   5  -4   -0.38    0.97
   2  -5   4    3.80    1.63
   2  -5   4    2.16    1.04
   2  -5   4    2.27    1.39
   2  -5   4    2.00    1.42
  -3   5  -4   13.27    1.88
  -3   5  -4    8.93    1.79
  -3   5  -4   12.41    2.34
   3  -5   4   16.07    1.88
   3  -5   4   11.25    1.90
   3  -5   4   16.52    1.65
   3  -5   4   10.06    2.20
  -4   5  -4    7.77    1.80
  -4   5  -4    3.98    1.87
  -4   5  -4    4.20    1.96
   4  -5   4    5.05    2.10
   4  -5   4    6.82    1.57
  -5   5  -4    2.22    1.64
  -5   5  -4    1.10    1.84
  -5   5  -4    2.51    1.80
   5  -5   4    2.76    2.03
   5  -5   4    1.32    1.40
  -6   5  -4    8.07    2.39
  -6   5  -4    4.95    2.10
  -6   5  -4    5.48    2.17
   6  -5   4    8.43    2.30
   6  -5   4    8.97    2.14
   6  -5   4    4.37    2.37
  -7   5  -4    1.15    1.96
  -7   5  -4    2.01    1.93
  -7   5  -4   -0.41    1.95
   7  -5   4   -1.17    1.93
   7  -5   4    0.86    2.53
   7  -5   4    1.20    1.72
  -8   5  -4    6.54    3.55
  -8   5  -4    4.79    2.30
  -8   5  -4    1.14    2.19
   8  -5   4    2.53    2.20
   8  -5   4    6.22    2.23
   8  -5   4   -1.78    2.24
  10   4  -4    5.56    2.33
  10   4  -4    1.85    1.76
  10   4  -4    7.90    2.33
 -10  -4   4    3.67    2.60
 -10  -4   4    2.57    2.03
 -10  -4   4    4.42    3.17
   9   4  -4   15.09    2.90
   9   4  -4   12.89    2.78
   9   4  -4   19.89    2.75
   9   4  -4   16.36    2.73
  -9  -4   4   14.12    2.84
  -9  -4   4   18.11    3.98
  -9  -4   4   11.49    2.91
  -9  -4   4   13.66    2.35
   8   4  -4    1.78    1.96
   8   4  -4    2.56    1.94
   8   4  -4    1.91    1.88
   8   4  -4   -1.10    1.37
  -8  -4   4    1.63    2.79
  -8  -4   4    3.60    2.16
  -8  -4   4   -1.11    2.03
  -8  -4   4    3.51    1.77
   7   4  -4   21.52    2.38
   7   4  -4   24.50    2.95
   7   4  -4   24.97    2.98
  -7  -4   4   23.41    3.13
  -7  -4   4   27.84    3.18
  -7  -4   4   28.12    4.14
  -7  -4   4   26.08    2.35
   6   4  -4    1.97    0.84
   6   4  -4    2.06    1.37
   6   4  -4    1.63    1.74
   6   4  -4   -1.48    1.49
  -6  -4   4    3.64    2.39
  -6  -4   4    1.38    0.80
  -6  -4   4    1.00    1.76
  -6  -4   4    1.70    1.81
  -6  -4   4    1.12    1.41
   5   4  -4    2.89    1.68
   5   4  -4    2.29    0.66
   5   4  -4    4.02    1.43
   5   4  -4    1.75    1.45
  -5  -4   4    1.39    1.34
  -5  -4   4    1.31    1.60
  -5  -4   4    3.47    0.80
  -5  -4   4    2.69    2.15
  -5  -4   4    4.26    1.82
   4   4  -4    0.26    0.39
   4   4  -4    0.68    1.17
   4   4  -4    0.70    1.05
   4   4  -4    1.09    1.50
  -4  -4   4    0.59    1.12
  -4  -4   4    1.63    0.66
  -4  -4   4    1.53    1.40
  -4  -4   4    0.27    1.64
  -4  -4   4    0.71    1.36
   3   4  -4  154.87    4.53
   3   4  -4  148.88    4.85
   3   4  -4  150.29    4.96
   3   4  -4  132.49    2.92
   3   4  -4  136.70    2.93
  -3  -4   4  150.90    4.54
  -3  -4   4  143.98    5.13
  -3  -4   4  139.53    4.63
  -3  -4   4  143.22    3.61
  -3  -4   4  144.80    5.57
   2   4  -4    1.17    1.19
   2   4  -4    1.75    1.40
   2   4  -4   -0.96    1.09
   2   4  -4    0.04    0.36
  -2  -4   4    1.09    1.18
  -2  -4   4   -0.72    1.04
  -2  -4   4    0.94    1.63
  -2  -4   4    0.22    1.18
  -2  -4   4   -0.31    0.70
   1   4  -4   12.76    0.97
   1   4  -4   13.24    1.62
   1   4  -4   10.84    1.61
   1   4  -4   13.53    1.76
  -1  -4   4   12.22    2.17
  -1  -4   4   11.18    1.83
  -1  -4   4   11.80    1.21
  -1  -4   4   12.93    1.62
  -1  -4   4   13.73    1.73
   0   4  -4   24.91    2.01
   0   4  -4   32.21    1.78
   0   4  -4   29.19    1.52
   0   4  -4   25.86    2.27
   0   4  -4   31.97    2.17
   0  -4   4   30.88    1.83
   0  -4   4   30.31    2.22
   0  -4   4   30.93    2.44
   0  -4   4   25.47    2.03
  -1   4  -4   19.15    1.52
  -1   4  -4   20.90    1.66
  -1   4  -4   20.07    2.06
  -1   4  -4   22.91    2.18
  -1   4  -4   21.24    2.03
   1  -4   4   20.85    2.12
   1  -4   4   23.12    2.27
   1  -4   4   22.25    1.74
   1  -4   4   17.79    1.85
  -2   4  -4    6.87    1.04
  -2   4  -4    6.01    1.55
  -2   4  -4    4.94    1.65
  -2   4  -4    7.07    1.29
   2  -4   4    8.26    1.59
   2  -4   4    7.91    1.31
   2  -4   4    6.59    1.35
   2  -4   4    7.54    1.81
  -3   4  -4    3.81    1.31
  -3   4  -4    1.94    1.51
  -3   4  -4    1.44    1.50
  -3   4  -4    3.29    1.13
   3  -4   4    2.83    1.73
   3  -4   4    3.21    1.04
   3  -4   4    4.42    1.44
   3  -4   4    3.58    1.30
  -4   4  -4   20.40    2.44
  -4   4  -4   16.03    2.30
  -4   4  -4   19.29    2.17
   4  -4   4   17.64    1.97
   4  -4   4   20.62    2.56
   4  -4   4   20.01    1.78
   4  -4   4   19.38    2.23
  -5   4  -4   25.12    2.91
  -5   4  -4   18.21    2.59
  -5   4  -4   20.30    2.44
   5  -4   4   21.10    2.81
   5  -4   4   16.90    2.33
  -6   4  -4    5.34    1.87
  -6   4  -4    7.36    2.09
  -6   4  -4    5.87    1.80
   6  -4   4   10.11    2.14
   6  -4   4    4.31    2.23
  -7   4  -4    0.70    1.79
  -7   4  -4   -0.21    1.81
  -7   4  -4    1.14    1.91
   7  -4   4    2.39    1.57
   7  -4   4   -2.96    2.22
  -8   4  -4    2.34    2.10
  -8   4  -4    3.77    1.97
  -8   4  -4    0.23    1.68
   8  -4   4   -0.99    2.25
   8  -4   4    1.32    1.41
   8  -4   4    6.62    2.35
  10   3  -4    6.49    2.36
  10   3  -4    4.24    1.81
  10   3  -4    1.97    1.89
  10   3  -4    1.22    1.73
 -10  -3   4    1.05    1.97
 -10  -3   4    2.10    2.24
 -10  -3   4    1.46    2.33
 -10  -3   4    5.42    3.17
   9   3  -4    3.21    2.09
   9   3  -4    2.20    1.96
   9   3  -4    2.77    1.75
   9   3  -4    3.47    1.99
  -9  -3   4    2.20    2.08
  -9  -3   4    1.77    2.16
  -9  -3   4    2.57    2.09
  -9  -3   4    2.40    1.80
  -9  -3   4    3.44    2.82
[truncated: 802,213 more chars]
